# Supplementary material
Source: publisher figshare collection journal article supplement (https://sage.figshare.com/ndownloader/files/17298704)
Supplement: Supplementary file 1 [file 17298704]

## Sheet: Modules
antiquewhite4	bisque4	black	blue	brown	brown4	coral1	coral2	cyan	darkgreen	darkgrey	darkmagenta	darkolivegreen	darkorange	darkorange2	darkred	darkseagreen4	darkslateblue	darkturquoise	floralwhite	green	greenyellow	grey60	honeydew1	ivory	lavenderblush3	lightcyan	lightcyan1	lightgreen	lightpink4	lightsteelblue1	lightyellow	magenta	maroon	mediumorchid	mediumpurple3	midnightblue	navajowhite2	orange	orangered4	paleturquoise	palevioletred3	pink	plum1	plum2	purple	red	royalblue	saddlebrown	salmon
Coq10b	Gin1	Lypla1	Tcea1	3110035E14Rik	B3gat2	Fastkd2	Clk1	Rpl7	Gm6104	Gm10075	Tmem177	Kctd18	Sdpr	Gm15453	Cnot11	Hibch	Ier5	Gm2383	Eif5b	Xkr4	Ncoa2	Sox17	Morn5	Stradb	Gm29084	Ube2w	Asnsd1	Jph1	Rnf2	Rprm	Msc	Mrpl15	Zfp281	Tdpx-ps1	Gm7329	Gm37108	Rfwd2	Stk36	Iars2	Gm7114	Dalir	Gm37567	1700019D03Rik	Carf	Gm37277	Arfgef1	Txndc9	Gm28659	Prex2
Gm10138	Hsd17b7	Snhg6	Rgs20	Sgk3	Wdr75	Catip	Lefty1	Paqr8	St18	Nabp1	Ddx59	AA986860	Osgepl1	Pdk1	Pou3f3	Syt14	Cfap45	Rpl5-ps1	Casp8	Eloc	Gm28756	Terf1	Harbi1	Gm38312	Tor4a	Gm37110	Cyp27a1	Gm15702	Kcnj10	Fap	Bivm	Atp6v1h	Gm38194	Npl	Espnl	Ccdc115	Trp53bp2	Ecel1	Rbm17	Serpinb8	Ino80dos	Mcmdc2	Eif2d	Fmn2	Pcmtd1	Crispld1	Myo1b	D930019O06Rik	Bag2
Eya2	Pigm	Tram1	Rrs1	Gm6473	F11r	Rab3gap1	Eprs	Slc9a4	Gm4852	Gm10561	Snapc4	Scyl3	Gm37607	Bub1b	Fam72a	Echdc3	Cdan1	Arid5a	Dhx9	Ogfrl1	Ptp4a1	Fam135a	Zfp937	BC003331	Dpm1	Ankrd39	Gm26683	Gm19680	4930447M23Rik	Tmco5	Stat1	Cops5	Slc12a6	Fastkd5	Acbd6	Gm6822	P2rx3	Asb1	Etl4	Wdr5	Lamb3	Rdh10	1700034H15Rik	Ptbp2	Cspp1	Mcm3	Kif1a	Nck2	Amer3
Nudt6	Fam171a1	Smt3h2-ps4	Mybl1	Phf3	Ttc30a1	Cenpl	Mtg2	Gm5526	Kansl1l	Rpl10a-ps1	Kyat1	Rgs5	Ankzf1	Gm14308	Rab7b	Coq4	Gm43566	Gm11578	Ccdc181	Gm28439	Slc40a1	Dst	Mme	Lefty2	Gid8	Gm38110	Syt2	Gm5527	Capn3	Cebpb	Rpe	Gm7658	Rmdn3	Mmp24	Nuf2	Fzd7	Thbs1	Gm3531	Mvb12b	Kbtbd4	Cox4i2	Stau2	Eif2ak4	Tacr3	Lactb2	Smap1	Arl8a	C130036L24Rik	Gm8326
Arhgef10l	Ankrd16	Gm15795	Vcpip1	Rab23	Spint1	Gsn	Arsj	Gm28151	Rnf25	Gm6159	Gdap1l1	Gm7694	Gm37738	Slc7a11	Aim2	Nfe2l2	Paxip1	Usp40	Tfb2m	Gm10222	Nbeal1	Hs6st1	Gpr88	Ccdc183	Frem2	Gm28900	C1ql3	Mreg	Bdh2	AI849053	Utp14b	Cnnm3	Gm45447	Tiparp	Fcer1g	Gm15464	Npr1	Gm25911	Strbp	Ddb2	Scand1	Gm37724	Csrp2bp	Stmn1	Khdrbs2	Prim2	Fam129a	Dtymk	Bzw1
Dbf4	Bloc1s2-ps	Tmem14a	A830018L16Rik	Fam168b	Itpa	Xkr8	Mrpl48-ps	Cdk15	Ncl	Gm6136	Polr3c	Nsl1	Gm37485	Rpf1	Sephs1	Zfp831	Zcwpw1	Hes6	Sptan1	Gm28438	D230017M19Rik	Mgat4a	Gbp3	Slc4a11	Taf13	Cflar	Gm13629	Pask	Pla2g5	Psrc1	Gm18180	1500015O10Rik	Kcnd3	Cth	Rsu1	Gm5528	Mxra8	Ttf1	Chn1	Rpusd2	Golim4	Bend6	Rtel1	Ccdc18	Tbc1d8	Zap70	Copa	Rpl28-ps1	Als2
Rasal1	Gm13809	Gm28437	Gdap1	Tsga10	Pcsk2os1	Stbd1	Gm5555	Mff	Epb41l5	Traf3ip1	Agbl4	Rcor3	Sag	Grhl3	Dhtkd1	Etnppl	Setmar	Rab29	Nup188	Gm10925	Ctdsp1	Pnkd	Ripk2	Gm20754	Gm12693	Erbb4	Lrrc55	Panct2	Tmco4	B4galt1	Nifk	Cnppd1	Srsf11	Lzic	Rapgef4	Wnt10a	Rheb	Ermn	Ndufaf1	Ppip5k1	Scamp3	Arhgef4	Gm8797	Flnc	Tgfbrap1	Vwa3b	Gm3809	Batf3	Gm973
Ddx55	Ndufaf5	Gm29216	Rims1	AI597479	Entpd6	Fras1	Cdkl2	Tmem37	Mcm6	Sned1	Azin2	Usp6nl	Tnfrsf11a	Zbtb48	Upf2	Lrrc7	Cpeb1	Gm10171	Fpgs	Gm28661	Zfand2b	Slc4a3	Gm11224	Hapln2	Isg15	Gm5829	Cdh4	Tmem183a	Fgfbp1	Inip	Gm3851	Mrpl44	Fam221b	Lap3	Adal	Rpl19-ps1	P2rx7	Agbl2	Pex11b	Sdcbp2	Syf2	Coa5	Actrt3	Zfp783	Hecw2	Tpp2	Nek2	Suv39h2	Plcd4
Nrf1	Uqcc1	Lmbrd1	Zfp451	Nab1	Cdh22	Kl	Fgf5	Ubxn4	Trmt1l	Gm29514	Capzb	Gm13316	Gm37214	4833413G10Rik	A230005M16Rik	Gpn2	Cars	Smyd2	Gm13736	Ptpn18	Stk16	Ilkap	Zfp27	Amy1	Nat8	Sgpp2	Ppdpf	Colgalt2	Dok1	Mroh7	Nuak2	Serpine2	Sfn	Acads	Gm10762	4933407L21Rik	Stk33	Dnajc24	Prmt6	Actl6a	Hes5	Fhl2	Ankub1	Zfp956	Plcl1	Pms1	Stam	Taf3	2310035C23Rik
Zfp28	Bbs12	Gm3617	Imp4	Trak2	Olfm3	Aqp1	Arf5	Gpr37l1	Rnasel	H3f3a	Nphp4	Ccdc148	Pip5kl1	Nelfa	Card9	Alms1	Taf5l	Ntmt1	Dnajc17	Cox5b	Gm5257	Tsn	Alg11	4930447N08Rik	Pcf11	Ap1s3	Car3	Dusp12	Lair1	Rbm48	Zbtb41	Psmd1	Gm42860	Aldh1l1	Proser1	5033417F24Rik	Nat1	Lrrc57	E130308A19Rik	Ccna2	AW011738	Dnah7a	Anks6	Apobec1	Raph1	Gtf3c3	Tsc1	Mir670hg	Ncf2
Exosc5	Bche	Il1r1	Plekhb2	Fam117b	Abca1	Zfp658	Emg1	Lamc2	Dedd	Gm32200	Rsbn1l	Sord	Ptgs1	Actl6b	Brd3	Zfp14	Zfp202	Cfap157	Nfs1	Mrpl30	Wdfy1	R3hdm1	AI429214	Tstd3	Pycard	Gm7867	Gm2136	Ppox	Kansl2-ps	Agbl5	Arpc5	St8sia4	Mtf2	Zfp606	Gm5641	Tmem185b	Zfp963	Gatm	Gm17244	Gm42568	Bloc1s4	Inha	Efcab7	Dmpk	Stk11ip	Rftn2	Sh2d3c	Mpped2	Glul
Tead2	Alad	Gm28175	Kansl3	Ica1l	Tek	Emsy	Plekha4	Tor3a	Coq8a	Traf5	Ptpn13	Ddx27	Olfml2a	Mtmr14	Cdca7	Igf2	Parp16	Gm13443	Dhx35	Rpl31	Dnajb3	Pigr	Sdr42e1	B4galt2	Gm1943	3110009E18Rik	Henmt1	Usf1	Rps13-ps2	Pgm1	Gorab	Cdh19	Tmem119	Lgi4	Thbs3	Gm8451	Ap3s1-ps2	Srxn1	Ubxn10	Ift80	Parp12	Gm29055	Lurap1	Gpr4	Ngef	Aox1	Baz2b	Kiz	Mettl18
Fes	Hpdl	Tyw5	Actr1b	Abi2	Ddost	Folr1	Homer3	Atp1a2	Abl1	Nrarp	Noc4l	Plk4	Pla2g4e	Ogg1	Zc3h15	Ttc12	Sgk1	Rnd3	Ppid	Pantr1	Asb18	Igfn1	Gpr6	Zbtb8os	Prtg	Tmem163	Grin3a	Zbtb18	Rbmxl1	Rpia	Aldh9a1	Inhbb	4732496C06Rik	St5	Vps72	Rpl31-ps9	Gm6793	Pde7a	Gm694	Cd160	A730020E08Rik	D1Ertd622e	Cwh43	Ccdc97	Lrrfip1	Nif3l1	Ubr3	5430405H02Rik	Tada1
Gm8730	Tnfrsf1b	Aox3	Inpp4a	Pard3b	RP23-92D22.3	Bbs2	Mtfmt	Meig1	Ssb	Sapcd2	Snrnp35	Patj	Ism1	Tfpt	Tcp11l1	Calml4	Hace1	Rbm43	Nexn	Gm20646	Gm17415	Uchl5	AU041133	Nos3	Abhd14b	Snrpe	Zcchc11	Lyplal1	Gm45396	Dguok	Kif26b	Htr5b	Hs3st4	Gm4366	Adamtsl4	Gm29257	Ankrd49	Intu	Sri	Fancg	Ino80b	B230216N24Rik	Crlf2	Tbcb	Ppp1r7	Eif4a-ps4	Scrn3	Zfp968	Adamts4
Foxc2	Cmklr1	Sumo1	2010300C02Rik	Ino80d	Kdelr2	Drc7	Arl1	Dolpp1	Pde11a	Lhx2	BC037034	Atg4c	Pxmp4	Fbxo27	Ganc	Hivep2	Supv3l1	Phospho2	Szt2	Gm8420	Thap4	Sdhc	Nts	Shisa3	Hebp2	Tnni1	Elovl1	A130010J15Rik	Eef1a1	Ap2s1	Sde2	Dars	Col4a2	Prdx2	Phtf1os	Gm8618	RP23-356D13.9	S100a13	Fam185a	Tstd2	1600020E01Rik	Rnf152	Ssh1	Kctd14	Ppip5k2	Idh1	Plcb4	2210418O10Rik	Parp1
Ilf3	Trip6	Rpl31-ps14	Aff3	Zdbf2	Cecr6	Bsn	Gli1	Tor1b	Pacsin3	Nr6a1	Samd9l	Tesk2	Myl9	Sult2b1	Zfp341	Herc4	Mybpc1	Nup35	Depdc5	Gm3940	Lypd1	B4galt3	Bbs10	Pole	Unc5b	Gm19705	Gm26825	Optn	Amt	Tmem147os	Ptpn14	Cfh	Gpr83	Map10	Toporsos	Ube2t	Mns1	S100a16	Ugdh	Ints11	Zfp575	Celrr	Gm8494	Prkcdbp	Clasp1	Smarcal1	Necab3	Rpl13-ps6	Capn2
Neil1	Pot1a	Gm8885	Lonrf2	Creb1	Vwf	Slc29a3	Pym1	Gm13552	Prdm11	Gm26794	Tada3	Rcc1	Slc32a1	Sergef	Spata2	Irgm1	Spryd4	Serping1	Mad1l1	9130024F11Rik	Pappa2	Rgs7	Lamb1	Cabp1	Atox1	Gm37903	Scarb1	Gm13328	Scn5a	Faap24	Ehmt1	Cacna1e	Il10ra	Birc2	Nasp	Ildr2	Fam214a	Lysmd1	Aasdh	Pex1	Tsks	Nckap5	Krba1	Lhpp	Rbbp5	Dnpep	Gm14168	4930579G24Rik	Bpnt1
Plcd1	Shisa7	Gm15843	Npas2	Ccnyl1	Zfp719	Apc2	Asgr1	Scn3a	Cdk5rap1	Neurod1	Bms1	Lypla2	Kcnb1	Fgfr2	2610316D01Rik	Utp18	Wrap53	Ctdspl2	Hnrnpa2b1	Ndufb3	Rabgap1l	Angel2	Arel1	Col26a1	Nme1	Gm37371	6330418K02Rik	Ssna1	Gipc3	Clec11a	Crb2	Gm15429	Myo5c	RP24-406I15.3	Grrp1	Gm6286	Gstt3	Mtmr11	Trim24	Garem2	4930516B21Rik	Gm28800	Asprv1	Gm5607	Klhl12	Gmppa	Ift52	6330549D23Rik	Ccdc3
Lcp2	Erf	Slc23a3	Map4k4	Map2	Spock3	Gm11611	Ptges3l	Calcrl	Acss2	Gm19426	Itfg2	Per3	Hrh3	Ido2	Map9	Serpinb1a	Map2k6	Dusp2	Ccdc174	Bmpr2	Gm37768	Apbb1ip	Hsp90aa1	Rsph10b	Mycbpap	Fcgr2b	Ninj2	Cercam	Adamts2	Urah	Gca	Myoc	Nt5e	Zfyve21	Miip	Ddr2	Gamt	Hist2h2be	Ubn2	D930016D06Rik	Plpp2	Elk4	Wtip	Fam192a	Ppp1r12b	Dock10	Usp13	Gm21541	Nudt5
Rnf112	Zfp382	Fam134a	Gulp1	Ikzf2	Nat2	Cacng5	Sphk1	Mdk	Actr5	Zfp661	Eml2	Gtf2ird1	Cldn11	Brf2	Gm9774	Ccnh	Kif19a	Rin2	Rad51ap1	Eef1b2	Gm37069	Abi1	Gm5441	Brca2	Samd15	Nectin4	Gm44646	Aif1l	Zfp354a	Gm19744	Ccdc141	Rpsa-ps1	Nmbr	Ttc5	Steap2	Rpl27-ps1	Gm10778	Hist2h3c2	Vamp5	Fam109a	Gm5426	Tmem81	Atf5	Vta1	Ivns1abp	Armc9	Gm43205	Gm13304	Trub2
Arrb2	Gm4353	Resp18	Mars2	2017-03-04	Ncan	Fancm	1810032O08Rik	Tspan18	Arfgap1	Nkx2-2	Dedd2	Sh2b2	Ccnl1	Gm10654	E330034L11Rik	Otx2	Trim47	Id1	Mzf1	Gm15793	Aida	Arrdc1	Zfp58	Abtb1	Bloc1s5	Opn3	Gm44898	Arpc5l	Cyb5d2	Ssbp4	Gm13910	Blzf1	Tmtc2	Ephx2	1700096K18Rik	B230369F24Rik	Pno1	Gm43848	Isy1	Pms2	Tnfrsf13b	Rabif	Det1	Gm527	Smyd3	Cops7b	Anxa5	Ccl21b	Uck1
Crlf3	Adamts8	Tmem198	Satb2	Cnot9	Usp38	Slf1	Tpt1	Slc1a2	Uckl1	Commd7	Sars2	Zscan21	Gm20628	Mvb12a	Sec22b	Chtf18	Sirt7	Rpl5-ps2	Saxo2	Tmem169	Dtl	Med27	Ptprg	Clasrp	Dhfr	Gm8101	1810026B05Rik	Rps6-ps4	Gm11539	Lsm4	Kif18a	Ephx1	Adam19	Sucla2	5930412G12Rik	Gm37070	Nemf	Col25a1	Zfp444	Zkscan14	Pfn1	Tnnt2	Atg16l2	Gm26512	Cdc42bpa	Mterf4	Ubap2l	Ccl21a	Zbtb6
Wdr70	RP23-193N1.2	Bok	Fam126b	Dnajb2	Foxred1	Xrcc4	Diaph3	Apip	Fat4	Dnttip1	Trim3	Mcm7	Rbm8a	Gm7984	Fam46c	Mut	Cdhr3	Acot8	Sugp1	Rpl37a	Gm10516	Miga2	1810041L15Rik	Zfp30	Vdac2	Kcnk2	2310010J17Rik	Clp1	Top2a	Tradd	Haus2	Tgfb2	Dnah2	Capsl	Micall2	Srp9	Pinx1	Tet2	Zfp574	Bmt2	Rps6kb1	Gm29170	Xndc1	Pdcd6	Mark1	Stk25	Cgn	Slc44a1	Rif1
Zbtb12	Moxd1	Cdh7	Cbx3-ps7	Agfg1	Snupn	Pspc1	Chrd	Gm9864	Supt20	Snx21	Paox	Uspl1	5330417C22Rik	Hook2	C130013H08Rik	Lars	Acot5	Rbm38	Phyhipl	Pde6d	Gm45902	Garnl3	Trmt10c	P2ry6	Gm24447	A430027H14Rik	Gm15500	Pex16	Btbd7	Zfp821	Eif3j1	Slc30a1	Gm24187	Cmbl	Mdfic	Pdcd5-ps	Abcc4	Ubxn2b	Snrpa	Herc3	Gm16861	2810414N06Rik	Arfip2	Gm6145	Camsap1	Neu4	Gstm1	Tusc1	Tanc1
Tnfaip8l1	Thg1l	Insig2	Mdh1b	2810459M11Rik	Nmnat3	Lmo7	Cyp4f16	Nop10	Crabp2	Mmp9	Abhd8	Nod1	Gm37928	Cdk10	Necab1	Acaa2	B3galnt2	Stmn3	Bcl11a	Neu2	E030013I19Rik	Rabepk	Lclat1	Rbbp6	Dazl	Cstad	Kcnq1ot1	Ccdc32	Dio3	Rpl13	Gm14117	Kcnh1	3110070M22Rik	Atad2	Gm20387	Msrb2	Clybl	Gm12751	Eid2b	Pex26	Gfer	1700025G04Rik	Cilp2	Zic2	Mrps2	Gm6430	Stxbp3	Fabp3	Agps
Ercc3	Recql5	Thsd7b	Klf7	Ptma	Qars	Cmtr1	Btk	D330050G23Rik	Gdap2	Trp53rka	Asna1	Aplf	Slc9b2	Afg3l1	Ddx58	Entpd1	Cdk20	Gm10254	Psme4	Twist2	Arl5b	Pkp4	Cnnm1	Deaf1	Tpgs2	Gm13493	Dctn6	Cdc25b	Zkscan3	Acta1	Zfp120	Phyh	Ndufb9	4930481A15Rik	Rpusd3	Tmem141	Abhd10	Zfp37	Osbpl5	Zfp324	Nrtn	Stx6	Gm10638	Pabpc1	Gtf3c5	Ddx18	Ank2	Thap3	Dusp19
	Taf1b	Lemd1	Plekhm3	Eif4e2	Adat2	Kdm5d		Crls1	Slc25a24	Gm14387	Fbxo31	Hmces	Gbp2	Ppan	Ubap2	Gprasp1	Gm10409	Gm9762	Nup88	Cops9	Mllt10	Dync1i2	Kdm6a	Car7	Ankhd1	Slc39a13	Fam32a	1110034G24Rik	Zfp563	Zfp653	Dsn1	Sec61a2	Cdpf1		Atp5sl	Rpl7a	2017-03-03	Gm12655	Ckap2	Ercc1	A730017C20Rik	Sdccag8	E2f4	Irak4	Setx	Actr3	Ddit4l	Fam53a	Arfgap2
	RP24-226N22.2	Adora1	Unc80	Efhd1	Tube1			Sec23b	Rpsa-ps10	Gm5846	Tyk2	Grip2	St6galnac3	Kri1	Klf4		Oxnad1	Rhoc	Taf15	Dusp28	Surf2	Metap1d	Ccdc160	Zdhhc1	Ifit1	Cd59a	Gm26721	Spag4	Rbm22	9530077C05Rik	Rbl1	Itga8	Hmgn1		Gm9294	Adamts13	Aifm1	Mier1	Kars	Apba2	Srpk3	C130074G19Rik	Pkd1l3	Nde1	Rapgef1	Gm4204	Dnaja1	Gm42528	Abtb2
	Gstz1	Adipor1	Tns1	Gigyf2	Man1a			Cst3	Grhpr	Elf2	Ift46	AW146154	Manea	Ppm1m	Foxo6		Ska3	Dbt	Bcas3	Gm15427	D2Bwg1423e	Cir1		Pstpip1		Gjd2	Hsf4	Gnas	Kat5	4930581F22Rik	Nnat	Slc39a12	Ifit1bl2		Cd37	Rpl12	Mospd1	Pcsk9	Ccdc159	Iqgap1	Gm15201	D730003I15Rik	Ppp2r3d	Olig1	Lrsam1	Lhx9	Anp32b	Alkbh2	Bbox1
	AW209491	Shisa4	Usp37	Arl4c	RP23-43M12.2			Pofut1	Prpf4	Sertm1	Scaper	D430042O09Rik	Tmem8b	Slc26a6	Clspn		Mtbp	Sec24d	Dnajc7	Pign	Slc25a25	Cwc22		Faim		A530058N18Rik	Zfp810	Edn3		Zwilch	Top1	Thnsl1	Slc10a3		Plk1	Gm13408	Apool	Ttc22	Ccdc151	Apbb1	mt-Co1	Gm13375	Gnaz	Dscr3	Gpd2	Gm5837	Snapc3	Acad10	Mga
	Trim27	Rgsl1	Bcs1l	Col6a3	Tefm			Sdc4	Kti12	Dcst1	Cep63	Vps36	Zcchc7	Kiss1r	Pef1		Bcl6	Rbm12b1	Plekhh3	Etnk2	Ptrh1	Frzb		Ano4		Zfyve19	Cdon	Pcmtd2		2900079G21Rik	Ppp1r3d	Tprn			C030029H02Rik	Gm13436		Akirin1	Herc1	Rspry1		Rnf208	Ccm2	Dll1	Tbr1	Swt1	Ift74	Gm10051	Ubr1
	Tdp2	Gm2000	Ttll4	Ube2f	Fbxo33			Slc13a3	Dmrta2	Lrif1	Nat6	Lonrf1	Txn1	Cdkl3	Nudc		Zfp942	3110043O21Rik	Cep131	Gm26781	Arl5a	Kcna4		Ndufa12		Kcnip3	Gm29562	Gm9169		Klhl40	Tpd52l2	Ptgds			Yjefn3	Rpl35		Fam131c	Cdk1	Ets1		C330006A16Rik	Nacad	Npas4	Gad1	Cacybp	Macf1	Prkrip1	Lcmt2
	Zfp72	Soat1	Cdk5r2	Gm29100	Serpinb9			Lama5	Slc6a9	Arhgap29	Mum1	Klhl2	Trabd2b	Gm12335	Gpatch3		Lrrc73	Fktn	Dcxr	2310009B15Rik	Gm13601	Fam98b		Commd1		Adam33	Parp3	Plekho1		Atp23	Sox18	Angptl2			Ifi30	Timm10		Slc25a34	4930430F08Rik	Fbxo22		Dnlz	Nt5m	Pla2g16	Dcaf17	Prdx6	Hspg2	Clec5a	Sqrdl
	Cenpm	Suco	Nhej1	Rnpepl1	Il17rd			Pex2	Ppie	Decr1	Tle2	Exog	Grik3	Skap1	Fv1		Gm5093	Jun	Atp6v1d	Gm16305	Lmo2	B2m		Stc2		Pdrg1	RP24-286B23.3	Pias3		Mpg	Ralyl	Stom			Wdr83os	Commd9		Gm27202	Slc46a1	Mlh1		Fam78a	Gps2	Bex2	Sp9	Kifap3	Usp48	2017-03-08	Trmt6
	Trmu	Sft2d2	Speg	Capn10	Gnl3			Crh	Heyl	Rpp25l	Cdk2	Hbs1l	Gm12963	Lrrc46	Slc4a1ap		Tmco6	Mycl	Rbm25	Glrx2	Rpl10-ps1	Trpm7		Wnt9a		Snhg11	Ank3	Nras		Usp43	Armc1	Mmadhc			Esam	Gm14004		Gm45495	Endov	Washc4		6330409D20Rik	4933427D14Rik		Hnrnpa3	Dcaf8	Ubr4	Rimklb	Btbd3
	Chkb	Creg1	Nyap2	Gm7895	Eef1akmt1			Commd2	Cdca8	Msantd3	Pes1	Bend3	Man1c1	H3f3b	Zbtb49		Rpl3-ps1	Stk40	Scgn	Teddm2	Katnbl1	Pdyn		Myh3		Gm14303	Tmem198b	AI115009		Tax1bp3	Gm7488	Hat1			Gm26631	Zfp133-ps		Unc119b	Kif13a	Eml6		Mapkap1	Efcab5		Sestd1	Fh1	Zfp991	Borcs5	Dstn
	Txnrd2	Gm7299	Irs1	Zcchc2	Adck5			Pdgfc	Ttc34	Caap1	Gm12033	Rps15	Eif4g3	Cdkl1	Fam184b		Utp14a	Zbtb8a	Ssbp2	2810025M15Rik	Snx5	6820408C15Rik		Ube2g1		Pmepa1	Pik3r6	Casp8ap2		Ccdc57	Rnpc3	Atp5g3			Bbs4	Nxt1		Mrps17	Kcnma1	Gemin5		Tank	Wnt3		Zfp804a	Lin9	Slc4a2	Gm26653	Plagl2
	Hdac3	Fcgr3	Pid1	Tfcp2l1	Scube1			Ctso	Gm7332	Echdc2	Adprm	Matk	Nat8l	Polr3g	Mob1b		DXBay18	Trmt112-ps2	Dnajc21	Mrps14	Raly	Mcts2		Rad51d		Zfand1	Gjd3	Ccdc163		Pou6f2	Cdc14a	Tfpi			Reps1	2500004C02Rik		Mlxipl	Neil2	A530017D24Rik		Plekha3	Slc25a47		Atg13	Pycr2	Fam193a	Zfp583	Ywhab
	0610009O20Rik	Tma7-ps	Gm6264	Ptpn4	Kcnj6			Pbxip1	Khk	Cmpk1	Ctc1	Irak3	Rab28	Ppp3cc	Crybb1			Slc25a33	Lrrc24	Gas5	Gm14399	Tti1		Ccdc103		Kcnmb2	B3gntl1	Rps8		Nr2f1	Tifa	Tnks1bp1			Tpd52l1	Eif2s2		Hip1	Hmbox1	Alox8		Gm13688	Phf7		Ino80	Prox1	Ep400	Meis3	Ogfr
	Igsf1	Gm37065	Gm2427	Pfkfb2	Slc8a1			Il6ra	Nop14	Snip1	Inca1	Tbrg4	Pkd2	Maf1	Pxn			Tnip2	Pick1	Gm37767	Zfp965	Fam83d		BC006965		Gm2011	Gm26777	Ppcs		Hspb3	Trp53inp1	Lrp4			RP23-240G3.2	Romo1		3110082I17Rik	Zfp41	Slc25a11		2810002D19Rik	Slc25a32		Oip5	Atp5c1	Tchp	Zfp428	Zgpat
		Gm2710	Cab39	Yod1	Ccbe1			S100a11	Zcchc4	Pusl1	Aspa	Pgam1-ps1	Flt1	Efcab6	Psmd9			Trmt44	Pus7l	Gm32391	Fam217b	Ptprt		Nova1		Lhfp	Tbc1d7	Utp11		Il17d	Ttpa	Hsd17b12			A830031A19Rik	Oser1		Gng11	Parp10	Arf2		Aven	Wisp1		Rpap1	Nsun6	Sirt4	Zfp36	Acad9
		Grem2	Dgkd	Rassf5	Gm8822			Gm20632	Zfp326	Zfp513	Osr1	Atpaf2	Kcnd2	Rhebl1	Agfg2			Stk32b	Maats1	Gm15853	Mrgbp	Chrna4		RP24-225A16.3		Il12a	Tnnc1	Ccdc28b		Gm16835	Mob3b	Ttc17			Xaf1	2900093K20Rik		Gprin3	1810021B22Rik	Pnpla8		2700033N17Rik	Eef1d		Spg11	Yme1l1	Pitpnm2	Zfp568	Abhd18
		Gm5561	Mroh2a	Nucks1				Atp5f1	Adgrd1	Tacc3	Vrk1	Atad5	Nfe2l3	Epha6	Rnf216			Msx1	2310061I04Rik	Gm16701	Rgs19	Kcnq2		Rmi1		Gm10040	Scel	Gpr3		Zfp707	Zbtb5	Rcn1			Hrh2	Pfdn4		Smyd1	Tymp	Prkd1		Rhov	Fam227a		Mrps5	Tubb4b	Zfp157	Gtf2h1	Pfn2
		Stum	Hjurp	Klhdc8a				Csf1	Sbds	Lyar	Mak	Tubg2	Inmt	Pkdcc	Tpk1			Pxmp2	Dock11	Ufc1	Pkia	Rxfp1		Elovl7		Slc25a44	Panx2	Pdik1l		Arfgap3	Gm11223	Dtwd1			Etohd2	Atp5e		Gcfc2	Rbfox1	Brf1		Rtf1	Spats2		Ubox5	Rabl6	A430033K04Rik	AV356131	Gm5539
		Tmem63a	Agap1	Mdm4				S1pr1	Vps37d	Gm5866	Gmpr	Ttll5	C87436	Cabyr	Mthfd2			C130026L21Rik	Amer1	Pfdn2	Pag1	Rabggtb		Flnb		Elovl6	Hira	AB041806		Snrpc	Gm12669	Blvra			Zbtb11os1	Gm14434		Tprkb	Shisa9	Kif13b		Catsper2	Aifm3		Plcb1	Rpsa-ps9	Tecpr1	Lsp1	Arhgef26
		Cnih4	Scly	Sox13				Bmpr1b	Hspb1	Fam114a1	Thoc3	Zfp839	Slc6a6	Fibp	Setd5			Wdr66	Hnrnph2	Alyref2	Bhlhe22	Nsmaf		Ldlrad4		Bank1	Gm15743	Otud3		Zbtb22	Tal1	Nop56			Has1	Mrps28		Trh	Ube2l3	Tsg101-ps		Hypk	Park2		Cfap61	Ak8	Gm43597	Sgcz	Trim59
		Rpl35a-ps2	Per2	Btg2				Cyr61	E130309D02Rik	Rest	Fancc	Gm37276	Fancd2	Gm14608	Fam60a			Bud31	Ofd1	Dusp23	Sox2ot	Galt		Doc2g		Gm11942	Pkd1	Mrto4		Stk19	Hivep3	Mcm8			Tmem8	Sclt1		Etv6	Yeats2	Gsdmd		Bloc1s6	Fance		Cep250	Ddx31	Ccdc136	Ing2	Kpna4
		Cnih3	Hdac4	Ppfia4				Gm10288	Cyth3	Stap1	Msh3	Pde12	Rtn2		Isoc2a			Mtif3		Disp1	Spry1	Dock7		Dnajc4		Ccl27b	Cd14	Gm13202		Gm26910	Hmgcl	Naa20			Mad2l1bp	Gm42644		Mansc4	Rnf39	Parvg		Dut	Ino80c		Soga1	Gle1	Strip2	Ccdc130	Fmo5
		Nenf	Hdlbp	Phlda3				Slc44a5	3110062M04Rik	Rsrc2	Camk2g	Il17rb	Gm45819		Zfp628			Irf5		Slc30a10	5930409G06Rik	Ttc39a				Svbp	Gm17018	Gsap		Sssca1	Mul1	Crnkl1			Prr16	AW047730		9430041J12Rik	Sh3gl1	Dnaja3		Cep152	Pias2		Ralgapb	Asb6	Arhgap25	Cmc2	Gm43076
		Gpr158	Atg4b	Lad1				Tmem67	Gars	9130604C24Rik	R3hcc1	Tinf2	Csgalnact1		Nova2			Klf15		Lpgat1	Rfxap	Mknk1				P3h1	Rbmx2	Rnf32		Znhit2	Szrd1	Gss			Ptpn2	Polr3gl		Zfp78	Hdgfrp2	Nubp1		Slc27a2	Ehbp1l1		Ncoa3	Prrx2	Iqsec1	A230050P20Rik	Dpyd
		Gm13340	Ing5	Prg4				Rmdn1	Gm16433	Ppp1r35	Tars	Dgkh	Slc38a7		Zfp526			Adamts9		Gm26315	Tsc22d2	Tmem53				Fndc5		Slbp		Tceal3	Zfp933	Lbp			Ppp1r32	Bcas2		Zfp773	Tgif1	Cep97		Zc3h8	Incenp		Arfgef2	Exosc2	Itpr1	Sltm	Ube2d3
		Spopl	D2hgdh	Rgs16				Cnr1	Cecr2	Mkrn2os	Zfp7	Nepro	Rab4a		Pak4			Suclg2		Gm13293	Serp1	Atp13a2				Atpif1		5730480H06Rik			Grpel1	Matn4				Rpl34		Akt2	Asxl3	Rwdd2b		1700037H04Rik	Psd		Arfrp1	Cdk9	Cand2	4833445I07Rik	Eif4e
		Mrpl41	Gm3608	BC034090				Gm12350	Slc25a18	Tmcc1	Ttll1	A930017K11Rik	Slc44a2		A230056P14Rik			Ints13		A930004D18Rik	Rap2b	Tnfrsf8				Slc35e2		Gm42933			Tbc1d14	Col9a3				H2afz		Zfp626	Zfp532	Usp16		Spef1	Rpl10		Impa1	Gm13414	Bid	Kcnmb4os2	Pkn2
		Adamtsl2	Phlpp1	Fam163a				Gm12372	Bhlhe41	Fbxl14	Mettl22	Anks1	Spc24		Homer2			Rps4l		Gm13341	Lekr1	Pex14				Cptp		Rpap2			Sepsecs	Gm5844				Enho		Zfp383	Rbm4b	Spsb3		Ap5s1	Tceal7		Cog6	Rabgap1	Mical3	Arhgef25	Rab2a
		Col5a1	Bcl2	Abl2				Ndufb6	Gltscr2	Slc6a13	Telo2	Pde9a	Pcsk7		Arap1			2810474O19Rik		Gm13339	Isg20l2	Rps4x-ps				Gm37090		Triap1			Chfr	Bbs7				Gm13306		Cox7a1		Fgd2		Tasp1			Dclk2	Nek6	Gapdh	Nabp2	Cpne3
		Olfm1	Vps4b	Ralgps2				Cntfr	Zfp61	Ccdc106	Vars2	Med20	Pih1d2		Plekha7			Psmd8		Dph7	Tchh	Orc5				Gm3510		Rita1			Phkg1	Mfsd8				Rps6		Rasip1		Wdr46		Syndig1			Smg5	Psmb7	Ncapd2	Ftl1-ps2	Smu1
		Zdhhc12	Gli2	Rasal2				Igfbpl1	2310022A10Rik	Prkd2	Riok3	Ctdp1	Tmem202		Pik3c2a			Zfp939		BC029214	Gm20634	Shh				Lhfpl3		Gm42918			Gna12	Eif2a				9530080O11Rik		Car11		Dxo		Rbck1			Trim46	Gm13461	Ano2	Rasl10a	Klhl9
		Tor1a	Ccdc93	Rc3h1				Gm11266	Fbl	Pex11a	Gm16286	Acy3	Parp6		Fam175b			Bcl2l12		Edf1	Prkab2	Ppm1g				2310074N15Rik		Ap1s1			Mpp6	Slitrk3				E130114P18Rik		Prc1		Gm10093		Dusp15			Lor	Orc4	Plekha5	Cnrip1	Ak4
		St6galnac4	Ccnt2	Ankrd45				Itgb3bp	Dbp	Ndufab1-ps	Fam111a	2017-03-05	Prss35		Tcerg1l			Gas2		Bmyc	Zfp697	Bre				Kcnk3		Fam220a			Tia1	Gria2				Uqcrh		Itpripl2		Trappc8		Chmp4b			Rorc	Gm13509	C2cd5	Sap30l	Pde4b
		Eng	Map3k19	Prrx1				Slc35d1	Lrrk1	Zscan2		Cwf19l1	Paqr9		Fadd			Chsy1		Sdccag3	Atxn7l2	Dok7				Gm42730		Hmgb1			Arpc4	Fcrls				Yrdc		Eri2		Pcdhac2		Dynlrb1			Anp32e	Wdsub1	6330408A02Rik	Unc119	Gm12715
		Arhgap15	Gm6170	Rcsd1				Plpp3	Rccd1	Rassf10		Casp7	Tmem108		Gm26804			Unc45a		Notch1	Gm12522	Acox3				A630023P12Rik		Alox5ap			Tatdn2	Bcan				Lsm10		Rgs10		Mus81		Map1lc3a			Rnf115	2017-03-07	Dhx34	Gm45716	Ythdf2
		Lypd6b	Mapkapk2	Pou2f1				Dnali1	Ppfibp2	Zfp768		Eno4	Grm1		Rbpms			Zfand6		Cacfd1	Tmem167b	Tbc1d19				Miat		Atoh8			Cdkn1b	Paqr6				Tmem234		Gtf2e2		Scyl1		Cnbd2			Camk2d	Psmd14	Actn4	Gngt2	Pithd1
		Lypd6	Srgap2	Pogk				C1qb	Cog7	Nkx6-2		Plxna3	E130307A14Rik		Primpol			Ccdc90b		Fam163b	Gm43379	Ube2k				Rpl37rt		Htra2			Tmem86b	Hax1				Dcdc2b		Zfp617		Rcor2		Snhg17			Rap1gds1	Ifih1	Shank1	Acbd4	Aldh4a1
		Galnt13	Cdk18	Fam78b				C1qc	Ppp4c	Smarce1-ps1		Brwd3	Ppil6		Rfxank			Insc		1700001O22Rik	Gm17501	Cox18				Gm15860		Pcgf1			Sbk3	Slc27a3				1700003M07Rik		Gm5909		Rbm41		Gm14204			Gbp7	Ttc21b	Myh14	Rprml	Crot
		Kcnj3	Tmcc2	Uck2				Gm13123	Mvp	Junb			RP23-309H21.1		Jak3			Prss36		D330023K18Rik	Triqk	Hnrnpdl				Fis1		Xpc			Zfp974	Ilf2				Zfp593		Gm45529		Alg13		Zfp335os			Tyw3	Gm4735	Cyth2	Gm11642	Pus7
		Acvr1c	Dstyk	Pbx1				Dhrs3	Ccdc189	Nol3			Hkdc1		Smad1			Dusp4		Swi5	Tmem55a	Helq				Gm3294		Brk1			Zfp619	Vps45				Rsrp1		Zfp612				Phactr3			Fpgt	Gm13680	Ttc23	Rab40b	Dnajb6
		Upp2	Pik3c2b	Uap1				H6pd	Taldo1	Gins2			Sirt6		Ier2			Casp3		1110008P14Rik	Bach2	Nudt9				Podxl		Mbd4			Kif7	Hfe2				A430005L14Rik		Nrgn				Samd10			Sdcbp	Rtn4rl2	Clpb	Rpl36-ps3	Eif2b4
		B3galt1	Plekha6	Pcp4l1				B3galt6	Cdkn1c	Abcb10			Zrsr1		Nfix			Zfp866		Dpm2	Srsf12	BC005561				8030453O22Rik		Apold1			Gm7964	Olfml3				Gm42847		Cbl				Mir124-2hg			Whrn	Psmc3	Dctn5	Foxn3	Yes1
		Cers6	Ptpn7	Usp21				Fam133b	Tma16	Smco4			Aloxe3		A230103J11Rik			Pgpep1		St6galnac6	Gm21955	Prkab1				Gm8129		1700027J19Rik			Clns1a	Slc16a1				9230114K14Rik		Zfp609				Gm43672			Trim32	Cat	Ank1	Siva1	Ccdc96
		Ssfa2	Ipo9	Arhgap30				Fzd1	Cpne2	RP23-228B2.3			Kcnab3		Gm45836			Dhps		Cntrl	Glipr2	Gm15728				Gxylt2		Gm18194			Ucp3	Rap1a				Pi4k2b		Rsl24d1				Tbl1xr1			Cntln	Nat10	Map3k21	Ninj1	Nwd2
		Mtch2	Nav1	Pea15a				Mpv17	Fbxl8	Imp3			Slc2a4		2310022B05Rik			Nip7		Gm13446	Slc25a51	Oas1c				Ret		Zfp108			Rrp8	Vcam1				Rpl9		D430036J16Rik				Gm6505			Sh3gl2	Depdc7	Slc37a2	Zfp874b	N4bp2
		Ptpmt1	Csrp1	Chml				Cd38	Vac14	Ifrd2			Gm11613		Amotl1			Fam89a		Gm13453	Mrpl50	Plod3				A2ml1		Zfp94			Rabep2	Snx7				Gm6051		Lca5				Gm43667			Elavl4	Mettl15	Trappc4	Gm10340	Uchl1
		1700029I15Rik	Kif21b	Gm38300				Slc4a4	Bcar1	RP24-347C6.4			Mgat5b		Carm1			Sdhd		Zeb2os	Cdc26	Cnpy4				Gm44215		Sertad1			9130023H24Rik	F3				Parm1		Slco2a1				Mccc1os			Mast2	Rad51	Usp28	Scx	Gm5869
		Cd82	5730559C18Rik	Efcab2				Paqr3	Gas8	Dnajc12			RP23-118L13.2		Arid3b			Morf4l1		Dpp4	C630043F03Rik	Eif2ak1				BC064078		Dll3			Ctbp2	Aimp1				5430403G16Rik		Tmie				4921539H07Rik			Ipo13	Ciao1	Peak1	C1qtnf6	Cdc7
		Immp1l	Camsap2	Cnst				Coq2	Zfp599	Snrpd3			Dcaf4		Smad6			Twf2		Scn9a	Acer2	B3glct				Gm43949		Med29			Edrf1	Ctbs				Gm15559		Tet1				Gm37696			Srsf4	Fahd2a	Hcn4	Nol12	Ddx51
		Ltk	Nek7	Enah				Gpat3	Cep164	1810043G02Rik			Bbof1		Csnk1g1			Mapkapk3		Mettl5os	Cyp2j12	Ing3				Ndufa3		Ptov1			Mki67	Ptger3				Pop5		Gzmm				Sptssb			Oprd1	Anapc1	Lrrc49	Ccdc14	Fbxw8
		Tmem87a	Cdc73	1700047M11Rik				Dmp1	Bco2	Cdc34			Spata7		Nphp3			Katna1		Gorasp2	Ssbp3	Gm37940				Gm44890		Gm35040			Glrx3	Osgin2				Rpl6		Midn				Etv3			Hnrnpr	Gm14026	Cgnl1	1110004E09Rik	Acad12
		Casc4	Trove2	Fbxo28				Zfp951	Man2c1	Cnn2			Olfr11		Cdc25a			Gm9824		Sp3os	Dmrtb1	Mest				Ryr1		Gm2115			Cracr2b	Nudt2				Tmem116		D10Wsu102e				Gpatch4			Rap1gap	Idh3b	Myo5a	Dynlt1c	Ran
		Fbln7	Rgs2	Dusp10				Fgfrl1	Uaca	Mex3d			Mboat1		Fbxo30			Ddo		Itga4	Gm12816	Gpnmb				Polr2i		Thap12			Slc25a15	AI464131				Chchd2		Csrp2				1500004A13Rik			Rcc2	Vps16	Mlip	Tagap1	Alkbh4
		Gm14044	Tpr	Gm2061				Vps29	Pgm3	Hmg20b			Dtnbp1		Utrn			Aifm2		Selenoh	Col9a2	Fam221a				Hspb6		Gm5905			Gins4	Fbxo10				Rcc1l		Slc39a5				Zbtb7b			Fbxo42	Gm14285	Gclc	Tcte2	Gm5564
		Rnf24	Rgl1	Esrrg				Gusb	Zic4	Mdm1			S1pr3		Rnf146			RP23-65M10.2		Ypel4	Map7d1	Tax1bp1				Dmkn		Zfp964			Cdkn2aip	Nr4a3				Abhd11		Pisd-ps1				4632404H12Rik			Mthfr	Fermt1	1190002N15Rik	Axin1	Mrm2
		Gins1	Smg7	Vash2				Gm15920	Cep70	Mars			Ercc6l2		RP24-366H8.3			Mmp11		Gm13772	CK137956	Grid2				Zfp788		Syce2			Zfp869	Nipsnap3b				Gm4963		Zfp2				Trim45			Kif1b	Mgme1	Sema3b	Notch4	Aimp2
		Rps15a-ps7	Nmnat2	Sertad4				Mmd2	Pik3r4	Gm12712			Zfp459		Bicc1			Gm8394		Rapsn	Ptp4a2	Elmod3				Vsig10l		Exoc3l			Gtpbp3	Cyp2j6				Lamtor4		Cdc42se2				A230001M10Rik			Ube4b	Dtd1	Ltv1	Nfkbil1	Zscan25
		BC029722	Rgs8	Nmt2				0610040B10Rik	Fam212a	Zfp830			Adamts16		Syde1			Pawr		A330069E16Rik	Nkain1	Gm44231				Iglon5		Pard6a			Gipc1	Cyp2j9				Zfp853		Cenpv				Trmt13			Chd5	Gm14121	Gm7399	Dnph1	Rasl11a
		Tmem189	Mr1	Fam107b				Rpa3	Eomes	Pex12			Jmy		Ascl1			RP23-360L4.4		Trp53i11	Cd164l2	Txnrd3				Ccdc114		Tmem170			Ist1	Cachd1				Polr1d		Ntn1				Ap1ar			Plch2	Gm14150	Ascc1	Mrps10	Pds5b
		Fabp5	Cep350	Celf2				Agbl3	Vill	Nt5c3b			Rad17		Gas2l3			Naca		Ldlrad3	Agmat	Slc25a26				Gm45311		2610044O15Rik8			Banp	1700024P16Rik				Fmc1		6330403K07Rik				5730508B09Rik			Gm29755	Hck	Smtn	Safb2	Pdk4
		1810022K09Rik	BC026585	Gm37499				Creb3l2	Rev3l	Gps1			Ppwd1		Nr2c1			Erbb3		BB218582	Ctnnbip1	Cpne9				Gabrg3		Barx2			Tarbp1	Magoh				Mad2l1		Cacnb1				Gar1			Mapre3	Eif6	Pgam2	Trmt61b	Ccser1
		Mtfr1	Zbtb37	Cacnb2				Tril	Sirt1	Atad2b			Cwc27		Nab2			Pex13		Gm21596	Errfi1	Grcc10				Atp10a		Rbm7			9230110C19Rik	Nrd1				Reep1		Stac2				Gm43254			Gtf3c2	Phf20	Sptbn1	4833418N02Rik	Kdm3a
		Rpl22l1	Dnm3	Nebl				Gm9794	Dapk3	Ttc32			Nnt		Ikzf4			Papolg		Srp14	Vamp3	Tgfb1				A230103L15Rik		AU019823			Atg4d	Urod				Vamp8		Eif1				Wwp1			Zfyve28	1110008F13Rik	Kcnip1	Emx2	Mat2a
		Gm15496	Prrc2c	Skida1				Ggcx	Gna15	Gm4294			Rec8		Limk2			Gm12138		1700020I14Rik	Phf13	Zfp566				Cpeb1os1		Csk			Bud13	Ptprf				Gm20383		Mlx				Pnrc1			Sh3bp2	Tgm2	Slu7		Mrpl19
		Gm38025	Rxrg	Acbd5				Capg	Gatsl3	Gm5786			Mapk12		Hus1			Irf1		Serf2	Tnfrsf25	Gpatch1				Stard10		Fam46a			Rab39	Col8a2				Lsm3		Hexim1				Ube2r2			Add1	L3mbtl1	Tbc1d9b		Rtkn
		Ndufb5	Rgs4	Ubac1				Eva1a	Zmat5	Rhoj			Dennd6b		Pdlim4			Nme2		Slc30a4	Rnf207	Grin2d				Olfr482		Gm37805			Rab8b	Iqcc				Rpl32		Cdc42ep4				Gm17167			Htt	Zswim3	0610009B22Rik		Gm9769
		Dnajc19	Ccdc190	Surf6				Nat8f1	Fbll1	Fos			Ano6		Grap			Ccdc43		Ctxn2	Dffb	Gm7336				Polr3e		Nudt16			Leo1	Tinagl1				Rpl36a-ps3		Narf				Tpm2			Rgs12	Trp53rkb	Mprip		Hdac11
		Gm5148	Uhmk1	Med22				Chchd6	Top3a	Rin3			Lmbr1l		Srr			Ubald2		Fbn1	Ccnl2	Gm45169				Gsg1l		3000002C10Rik			Glyctk	C1qa				Etfrf1		2810032G03Rik				Tbc1d2			D5Ertd579e	Mocs3	Aldh3a1		Nr2c2
		Selenot	Nos1ap	Rxra				Tpt1-ps3	Dvl2	Mpc1-ps			Slc4a8		Rnf135			Cbx8		Usp50	Gm3724	Lcmt1				1700008J07Rik		Nme6			Stac	Mfap2				Rps25-ps1		Cmpk2				Col15a1			Kcnip4	Rae1	Myh10		Irak2
		P2ry12	Tomm40l	Ppp1r26				Lrrn1	Nle1	Gm266			Myh11		Heatr6			Alyref		Sppl2a	4932441J04Rik	Kctd13				Chst15		Cmtm7			AU023762	Mad2l2				Chmp2a		Ispd				Gm12709			Arap2	Nelfcd	Pitpnm3		Syn2
		1110032F04Rik	Pex19	Ralgds				Slc6a11	Ddx52	Abt1			Smpd4		Synrg			Wdr45b		1500011K16Rik	Apbb2	Fus				Nadsyn1		Csrnp1			Lats1	Disp3				B9d2		Lin52				C530005A16Rik			Fryl	Psma7	Shpk		Kdm5a
		Bglap3	Cep170	Sh3glb2				Timp4	Rad51c	Sox4			C2cd2		Fam117a			F730043M19Rik		Zc3h6	Ociad2	Cpxm2				Smim19		RP24-82M14.1			Nhsl1	Mterf1b				Rps16		Gm9726				Rnf220			Dck	Myt1	Myo18a		Rerg
		Krtcap2	Akt3	BC005624				Ltbr	Rnf43	Ftl1-ps1			Pigq		Thra			1110008L16Rik		Chchd5	Ccni	Zranb1				Htra4		2010107G23Rik			RP23-356G7.6	Grm3				Rpl13a		Prss16				Zfp691			Ankrd17	Car2	1700020L24Rik		Pyroxd1
		Dpm3	Gm8010	Ncs1				Hebp1	Phospho1	Ccno			Def6		Kansl1			Gm5436		Gm4430	Gm43681	D7Ertd443e				Nrg1		Egr2			Soga3	Sema3d				Lin7b		Hist1h4i				Ccdc30			Rasgef1b	Hps3	Akap1		Rdh13
		Efna3	Desi2	Fubp3				Mgst1	Ezh1	Gm2897			Rnf8		Cbx4			Zc2hc1c		Gfra4	Ccng2	Trappc5				D130040H23Rik		Polr2e			Atg5	Sema3a				Bax		Hist1h1c				Pabpc4			Wdfy3	Mrpl47	Epn3		Bckdha
		Atp8b2	Hnrnpu	Ciz1				Pthlh	Ifi35	Dnajc9			Slc37a1		Cenpo			Gm6863		Cenpb	Brdt	Chrnb3				Kxd1		Nfyb			Msl3l2	Pclo				Emp3		Rreb1				Zmym6			Arhgap24	Exosc9	Pnpo		Itpkc
		4933434E20Rik	Acbd3	Naif1				Isoc2b	Psmc5	Klhl33			Yipf3		Vsnl1			A230065H16Rik		Tmem230	Dr1	Tenm3				Rnf150		Dusp6			2310011J03Rik	Psmc2				Gm44644		Ranbp9				Tmem35b			Ube3b	Gm5537	Tanc2		Gm37494
		Jtb	Nvl	Fam102a				Gm45844	Smarcd2	Sap18			Atp8b1		Mycn			Klf6		Mkks	Hps4	Ano8				Mt3		Rpl6l			Gm3055	Sod3				Coa4		Id4				Zfp362			Git2	Dhx36	Bptf		Gm5898
		S100a6	Wdr26	Ak1				Axl	Tepsin	Gtf2f2			Cep192		Etv1			Sugct		Ovol2	Hrk	Zfp330				Ccl17		Tph2			RP23-324E2.11	Anapc4				Dchs1		Dok3				Gm12992			Oasl2	Smc4	Helz		Tjp1
		Gm4349	Brox	Ralgps1				Tyrobp	Zc3h14	Nufip1			Tex40		Gm1818			Ppp1r3g		Tmem74b	Mphosph9	Mri1				K230015D01Rik		Zc3h10			Rpsa-ps2	Gabrg1				Rps13		Trpc7				Trnp1			Bicdl1	Nmd3	Rnf157		Ngrn
		Ngf	Taf1a	Zbtb34				Rpl14-ps1	Setd3	Rgcc			Acta2		Zfp36l1			Arl10		Nrsn2	2810006K23Rik	Adcy7				Trhr2		Gm12164			Tbc1d10a	Chek2				Tmem219		Ankrd55				Myom3			Wsb2	Fnip2	Prpsap1		Tmem135
		Cd53	Gpatch2	Zbtb43				Luzp2	Slc25a29	Bora			Ints6l		Rnf113a2			Nop16		Manbal	Ccdc92	Arl2bp				Gm4316		Fam183b			Ccdc117	Selplg				Dctpp1		Fam107a				E2f2			Rph3a	Plrg1	Aatk		Trim21
		Gm4332	Gm37254	Pbx3				Chrna7	Foxq1	Tst			Gm6472		Vash1			Ddx41		Blcap	Limk1	Cntnap4				Slc35f3		Trim17			Fignl1	Usp30				Gm20501		Rpl15				Camk2n1			Gm15800	Gatb	RP23-228C13.2		Aldoa
		Tmem56	Kctd3	Lhx6				Acan	Rpp40	Maff			Vegfd		Dicer1			Gkap1		Pkig	6330403L08Rik	Kcng4				Slc36a4		Mief2			Pus10	Arpc3				R74862		2310069G16Rik				Iffo2			Brap	Mrpl24	Ankmy2		Sec23ip
		Snhg8	Ints7	Rbm18				Fzd4	Bmp6	Prph			Eif2s3y		Sp8			Zfp748		Pcif1	Adap1	Spg7				Epor		Zkscan6			Rpsa-ps4	Atp2a2				Tssc4		9930014A18Rik				Tas1r1			Atxn2	Cct3	Srp54a		Uros
		Mttp	Diexf	Rc3h2				Ndufc2	Brd9	Tfap4					Adarb2			Zfyve16		Zfas1	Zfand2a	Zpr1				Msantd2		Kdm6b			Zfp672	A930024E05Rik				Polb		Mroh5				Mmel1			Ppp1cc	Lmna	Sptb		Pwwp2b
		Tspan5	Camk1g	Zbtb26				Thrsp	Ccdc66	Tra2b					Sfxn1			Gm2904		1110018N20Rik	Zfp12	Rexo2				Ccdc84		Rpain			Gm12258	Orai1				Lsm1		Ccdc166				Faap20			Eif2b1	Pmvk	Actn1		Pgghg
		Rpl36a-ps2	A330023F24Rik	Zeb2				Gprc5b	Gm5803	Hes1					Klhl3			Shisa2		Tshz2	BC030343	Chrna3				AI593442		Nek8			Gm12612	Slc29a4				Sap30		Serhl				Tmem88b			Glt1d1	Ints3	Sipa1l1		Ccnd1
		Rps20	Dclre1c	Mbd5				Mgmt	Phf20l1	Lnp1					Hnrnpa0			Gm7666		Prelid3b	Zfp655	Adpgk				Col6a4		Poldip2			Ubb	Rfc3				Borcs8		Odf3b				Gatad1			Syna	Rplp0-ps1	9030617O03Rik		Camsap3
		Impad1	Frmd4a	Cacnb4				Gm4459	Naprt	Vgll3					Mef2c			Ankrd54		Gm14391	Gtf3a	Igdcc4				Cacna2d2		Dusp14			Smtnl2	Vps50				2010320M18Rik		Tvp23a				5031425E22Rik			Tnrc18	Them4	Ppp4r4		Rasa3
		Dpy19l4	Prpf18	Stam2				Tspan4	Tigd5	D16Ertd472e					Rnf180			Mcat		Gm6710	C1galt1	Rbm6				Tusc2		Tbx2			Gm12345	Col1a2				Slc5a5		Socs1				Kmt2e			Smurf1	Tdrkh	Serpina9		Ash2l
		Ggh	Bend7	Rbms1				Nudc-ps1	Hgh1	Lix1					Zmiz1			Krt2		Gm14296	Gm9825	Setd2				Trank1		Rpl19			Nufip2	Pon2				Use1		Parp14				4933427G23Rik			Cttnbp2	Mrpl9	Ak7		Prosc
		Smim8	Camk1d	Fign				Slc7a2	Mcrs1	Kremen2					Slc7a7			3110001I22Rik		Gm14326	Umad1	Scp2-ps2				Gm21781		Neurod2			Suz12	Ptprz1				Smim7		Dubr				Fastk			Impdh1	Psmb4	Ncapg2		Zfp882
		Sigmar1	Sfmbt2	Cobll1				Siah1a	Bdh1	Mrps34					Xkr6			Efcab1		Rps21	Ybx1-ps2	Trmt11				Gm10335		Psmc3ip			Gm12355	Snd1				Ndufb7		Gm2541				Gm9899			Tcaf1	Selenbp1	Vps41		1700030K09Rik
		Tomm5	Pfkfb3	Tlk1				Cbln1	Hcls1	Tmem204					Zic5			Sdf2l1		Gm27032	Zc3hav1l	Rwdd1				Mfsd4b4		Mrps7			Rdm1	Calu				Gm10643		Kctd5				Grk4			Zfp282	Pi4kb	Nol8		Smarca5
		Tgfbr1	Fbxo18	Dlx1				Tk2	Atg3	Clic5					Dab2			Ranbp1		Polr3k	Zfp862-ps	Srgn				RP24-286B23.1		Tsen54			Mettl2	Smo				4921524J17Rik		Gm26694				2210406O10Rik			Hpgds	Pip5k1a	Mccc2		Ddx39
		Tmeff1	Bmi1	Dlx2				Cmtm3	Mrpl39	Rrp36					Gga1			Cmss1		Gm2464	Gm7887	Kif1bp				RP24-270I10.1		Unk			Mif4gd	Tmem209				Aprt		Ggnbp1				Gm42427			Mrpl35	Tnfaip8l2	Usp54		Coq9
		Zfp189	Pip4k2a	Sp3				Has3	Hunk	Vmac					Baiap2l2			Mrps6		Gm43674	Prr15	Col6a2				RP24-323H7.5		Mrpl12			Sap30bp	Gm13835				Fbxl12		Gpsm3				Gm43268			Ctnna2	Setdb1	Adk		Edc4
		Slc31a2	Otud1	Wipf1				Crispld2	1700010I14Rik	Commd10					Ttc38			Zfp160		Gm7536	Plekha8	Hcn2				Col6a1		Lrrc45			1110002L01Rik	Akr1b3				Elof1		Cdsn				Gm20033			Smyd5	Tars2	Mettl17		Cmtr2
		Tnc	Gad2	Atf2				Zdhhc7	Tbcc	Srfbp1					Smarcd1			Metrn		Ttc14	Mturn	Abca7				Fgf22		Rps7			Slc26a4	Fam180a				Pigyl		Rab31				Smim14			Add2	Car14	Fam160b2		Mlycd
		Tmem261	Psd4	Zfp385b				Fam92b	Tfeb	Grpel2					Krt80			Stub1		8430422M14Rik	0610030E20Rik	Cradd				Rnf126		Ccdc71l			Arid4a	Tmem176a				Sc5d		Rhoq				Nsun7			Gm44421	Txnip	Plec		Tldc1
		Med8	Nsmf	Fnbp4				Itgb1	Fsd1	Aip					Sp7			Mrpl28		Gm11549	Tgfa	Osbp2				R3hdm4		Arl4a			Ngb	Ccdc126				Dapk2		Zfp438				Commd8			Rbsn	Nudt17	Lrrc14		Emc8
		Gm12966	Nacc2	Celf1				Cwc15	Myl12a	Zfpl1					Dtx3l			Angptl4		Cetn4	Tmf1	Ewsr1				1500009L16Rik		Dact1			Dio2	Hibadh				Rps27l		Gm10125				Kdr			Gm44429	Chd1l	Myh9		Pgbd5
		Serinc2	Gpsm1	Nr1h3				St3gal4	Gm7729	Pcgf5					Nsun3			Ddah2		Larp1b	Zfp239	Adcy1				Igf1		Zfp410			Yy1	Herc6				Snhg5		Kctd1				Hnrnpd			Gm44053	Phgdh	Vwa5b2		Mtmr2
		Gm13033	Inpp5e	Phf21a				Hepacam	Wdr55	Hhex					Sod1			Rpl7l1		Pgrmc2	Ptms	Pttg1				RP24-134D11.2		Jdp2			Dlk1	Abcg2				Rpl14		Gypc				Gm10419			Tmem72	Gm12428	Tbc1d23		Rab3d
		Aim1l	Sec16a	Gm13889				Spa17	Jakmip2	Gm15801					Zbtb21			Alk		Ndufc1	Gm26673	Trappc1				RP23-167J19.2		Gm8300			Exoc3l4	Prdm5				1110059G10Rik		Pcdhga12				2210016L21Rik			Mlf2	Ddx20	Clic6		Tbrg1
		Ubxn11	Rexo4	Prr5l				Fdx1	Ctxn3	Mrpl43					Cramp1l			Galm		5031434O11Rik	BC035044	Txndc17				Lgr5		Aspg			Cdca4	Loxl3				CAAA01180111.2		Gramd3				Gatc			Chd4	Wdr77	Dact2		Zw10
		Nbl1	Gtf3c4	Trim44				Scamp2	Tcf4	Lzts2					Uhrf1			Taf7		Ufm1	Gabarapl1	Zzef1				Kremen1		Tmem196			Arid4b	Antxr1				Rmnd1		Mrpl49				Suds3			Far2	Gstm5	Zfp960		Sik2
		Gm13031	6530402F18Rik	Hipk3				1600029O15Rik	Pstpip2	Npm3					Cdkl4			Sall3		Tm4sf1	Crebl2	Inpp5k				Vwc2		Ggps1			Carmil1	Sec61a1				RP23-464F18.3		Kif11				Iqcd			Ppp6r1	Gstm6	Zfp994		Atm
		Ubiad1	Set	Pax6				Elovl5	Fam69c	Ppp1r3f					Epas1			Rbm4		Fam198b	Fgfr1op2	Nsrp1				Nipal4		Acot13			Mcur1	Wnt7a				Abracl		Pdzd7				Gm43034			Zfp865	Gstm2	Rab11b		Cul5
		Slc2a5	Tbc1d13	Lin7c				Slc38a3	Aldh3b1	Ccdc120					Rock1			Hectd2		Arfip1	Arntl2	2610507B11Rik				Slc36a1		Aaed1			Rnf182	Uba3				RP23-288C18.3		AW822252				Stx2			Zfp418	Gnai3	Rab5a		Acsbg1
		Trp73	Crat	Fmn1				Cmtm6	Gm960	Rnf113a1					Epb41l4a			Smndc1		Gm3764	Leng9	Spag5				Fam57a		Gm5451			Nup153	Hrh1				Gm10275		Cetn2				Crcp			Zbtb45	Psma5	Clip4		Ireb2
		9430015G10Rik	Ptpa	Arhgap11a				Gm9385	Ccdc85b	Foxo4					Prob1			Zfp300		Tsacc	Tnnt1	Tada2a				2210008F06Rik		Rpl9-ps4			Gadd45g	Phb2				RP24-347C6.5		Gm20775				Dnajc30			Arhgap35	Sars	Map4k3		Hykk
		Cldn12	Fnbp1	BC052040				Slc18b1	Tkfc	Bex4					Pcdhgb7			Gpr101		Pmf1	Kmt5c	Luc7l3				Sebox		Zcchc9			Mxd3	Lag3				Cd164		Mid1-ps1				Mospd3			Irf2bp1	Rtca	Thada		Gm24270
		Tmem60	Lamc3	Meis2				RP23-356P21.1	Lpxn	Nxt2					Gnpda1			Rps6ka6		Lamtor2	Zfp524	Fbxl20				AA465934		Nsa2			Rsl1	Ndufa9				Cd24a						Gjc3			Dmwd	Plppr5	Rit2		Rab27a
		Gm15421	Prrc2b	Spred1				Gja1	Dmrt2	Zcchc16					Phax			Tceal8		Slc50a1	Zscan18	Ttc25				B230206L02Rik		Gm9828			Zfp493	Slco1c1				RP23-269H21.1						Usp42			Ethe1	Dnttip2	Sptbn2		Mto1
		Tomm7	Golga2	Bmf				Smpdl3a	Ifit1bl1	Piga					Rela			Maged2		Gm15417	Zscan22	Fam171a2				Mien1		Foxd1			Arrdc3	Itpr2				Rps8-ps1						Pdap1			Sptbn4	Mcub	Ccdc87		Rwdd2a
		Tmub1	Fam129b	Pak6				Npffr1	R3hcc1l						Patl1					Rps27	Vasp	Fzd2				Fads6		Smn1			Gm6055	Apoe				Cstb						1810059H22Rik			Sipa1l3	Gm5855	Map4k2		Bfsp2
		Selenoi	Gapvd1	Plcb2				Tspan15	Fbxl15						Papss2					Rab13	Zfp180	Strada				Snhg20		Rpp14			Psme1	Timm50				Gpx4						Bet1			Zfp74	Hadh	Fth1		Slc25a20
		Ost4	Dab2ip	Inafm2				Gm10146	Trub1						Ide					Snapin	Rinl	Dtnb				Rfng		Kctd6			Cab39l	Yif1b				Lsm7						Hipk2			Proser3	Adh5	Aldh1a1		Lars2
		Fndc4	Ttll11	A430105I19Rik				Ikbip	Pqbp1						Ccnj					Scnm1	Zfp420	Bzw2				Rnaseh1		Mettl6			Stc1	Aplp1				Ttc41						Igf2bp3			Med25	Usp33	Ifit2		Sacm1l
		Mrpl33	Mrrf	Chac1				Dcn	Cxx1c						AI606181					Cers2	Gm5113	Sptlc2				RP23-77B14.2		Gm15516			Pdlim2	Gramd1a				Cfap54						Cbx3			Irf3	Acadm	Hells		Gm8355
		Rbks	Pdcl	Chp1				Tmtc3	Ldoc1						Arhgap19					Ensa	Usf2	Gm20604				4930447C04Rik		Gm1821			Klf5	Slc7a10				Helb						Rnf181			Scaf1	Rpe65	Smc3		RP23-103E4.3
		Plb1	Golga1	Zfp106				Trhde	Fundc2						Pcgf6					Mrps21	Cebpg	Akr1c18				Gm16339		Mdp1			Prkaa1	2610021A01Rik				Rpl41						Gm44210			Prr12	Lyn	Maob		Rsph4a
		Gm1673	Scai	Snap23				Ormdl2	Jpx						Gm5931					Bola1	Nudt19	Gpr137b				Gm16596		Cenpj			Rrm2b	Etfb				Uqcr10						Cfap100			Herc2	Car8	Efhc2		Nt5dc1
		Mfsd10	Gm13456	Ttbk2				Cd63							Ocrl					Ankrd35	A230077H06Rik	Snrnp48				Meg3		Sftpc			Trib1	2410002F23Rik				Mrps24						Gm765			Myo7a	Ccne2	Slc9a7		Ranbp2
		Prom1	Kif5c	Trp53bp1				Pik3ip1							Arx					Man1a2	Cd33	Auh				Zfp386		Stk3			Arc	Fuz				Igfbp3						Gm26982			Ppme1	1110037F02Rik	Slc25a5		Tysnd1
		Gm42429	Prpf40a	Frmd5				Rnf215							Kcne1l					Slc22a15	Ppp1r15a	H2afy				Gm10421		Klf10			Puf60	Fcgrt				Gm12013						Tmem40			Rhog	Gem	Dkc1		Rhobtb1
		Tmem33	Csrnp3	Shf				Rps15a-ps6												Tspan2	A030001D20Rik	Mterf3				Nrsn1		Aard			Sh3bp1	Nucb1				Gm12031						Zfp248			Trim66	Nbn	Med12		Appl2
		Gabra4	Stk39	Eid1				Egfr												Mov10	Gm45441	Zfp825				Serpinb1b		Col22a1			Rpl3	Tmem143				Rps27a						Gm5112			Dennd5a	Ccnc	Huwe1		Pwp1
		Mthfd2l	Map3k20	Bcl2l11				Prorsd1												Lamtor5	Svip	Atp6ap1l				Faf2		Rpl8			Trabd	Gm5776				Snrnp25						Atn1			Ampd3	Coq3	Trappc2		Apaf1
		Fam175a	Gpr155	Gm4430				Sparc												Cyb561d1	Adamts17	Gm3839				Gm10767		Zbed4			Zfp263	Siglech				Gm12254						Vamp1			Usp47	Mdn1			Nedd1
		Lrrc8b	Osbpl6	Stk35				Mfap3												A930005H10Rik	Aen	Cacna1d				AW495222		Gm45465			Gm6142	Pcsk6				Hist3h2a						9330179D12Rik			Vwa3a	Rars2			Zfc3h1
		Gm28050	Ctnnd1	Hspa12b				Gjc2												Alg14	Fam181b	Oxa1l				Lrrc3b		Atf1			Ube2v2	Mfge8				2810001G20Rik						9330102E08Rik			Prkcb	Aco1			Rap1b
		Hscb	Med19	Slx4ip				Atp1b2												1810037I17Rik	Gm10605	2410022M11Rik				Tmem55b		Nr4a1			Rimbp3	Cib1				Tmem107						Rhno1			Atxn2l	Topors			RP23-468J15.5
		Gm27004	Ube2l6	Rbbp9				Med31												Gm43194	Lipt2	Fbxo16				Cdadc1		Krt77			Cpox	Folh1				Mpdu1						Nrip2			Zfp764	Dctn3			Ptges3
		Gm42864	Zfp408	Insm1				Pigs												Dnajb14	Nfatc2ip	Stmn4				Mir124a-1hg		Eef2kmt			Rgmb	Prcp				Mir22hg						Ybx3			Stx1b	Nans			Mtfp1
		2410131K14Rik	Arhgap1	Ralgapa2				Brip1os												Lmo4	Sh2b1	Lpar6				Gm10233		Mylk			Zfp760	Serpinh1				Bhlha9						Smim10l1			Th	Gm12435			Xpo1
		Tpcn1	Dgkz	Fkbp1a				Gdpd1												Gng5	Sephs2	Mycbp2				Rpl37		Tagap			Zfp213	Mrpl17				Gm11425						Gm45769			Evi5l	Ikbkap			Ccng1
		Adam1a	Mapk8ip1	Tbc1d20				Supt4a												Gipc2	Srcap	2410089E03Rik				2017-03-11		Gm1604a			Rpl10a	Copb1				Znhit3						St8sia1			Ido1	Ptgr1			Ccnjl
		Diablo	Cry2	Sox12				Tmem100												4930570G19Rik	Ikzf5	Lrrc6				St3gal1		Gm16702			Brd4	Coq7				Gm11518						Cacng6			Pdlim3	Hdhd3			Skp1a
		Tmem248	Alx4	Zcchc3				Tob1												Gm11808	Ing1	Shisa8				Kifc2		Zfp13			Nfkbie	Nsmce1				Gm10039						Zfp787			Crtc1	Tle1			Gm12226
		Gm7285	Itpa-ps1	Ttll9				Ramp2												4930412C18Rik	Tdrp	Fmnl3				Cacng2		Rab26			Polh	Sult1a1				Rpl27						Smim17			Gm18860	Rraga			Fnip1
		Pdgfa	Api5	Asxl1				C1ql1												Gm12918	2610005L07Rik	Galnt6				Rbx1		Rps2			Plin3	Nsmce4a				Prcd						Ube2m			Tom1	Plin2			Acadvl
		Gpr146	Traf6	Nol4l				Ern1												Tmem64	Purg	Mzt2				Gm29666		Ndufb10			Crem	Htra1				2900041M22Rik						Inafm1			Arhgap10	Plaa			Ncbp3
		Ttyh3	Caprin1	Mapre1				Arsg												Fut9	Gsr	P2rx6				Zfp641		Fam195a			Cables1	Ctsd				Pomc						Mypop			Tbc1d9	Oma1			Ovca2
		Zdhhc4	Qser1	Myh7b				Cant1												4933421O10Rik	Irf2	Gp5				Asic1		Mettl26			Dtna	Pnpla6				RP24-490H13.8						Nkpd1			Zfp791	Mrpl37			Rpa1
		Gpr12	Arl14ep	Rbm12				Sf3b6												Gm12371	Myo9b	Ccdc191				Snn		Decr2			Trim36	Slc20a2				Rpl36al						Gm19345			Nudt21	Cpt2			Adap2
		Pomp	Zfp770	Rbm39				Ntsr2												Gm12396	Zfp961	Ift57				Tmem191c		Dusp1			C330018D20Rik	Fat1				Timm9						Zfp93			Gins3	Prpf38a			Tmem132e
		Sem1	Rasgrp1	Rprd1b				Dus4l												Bag1	4930432K21Rik	Filip1l				Tmem41a		Kifc5b			Amd-ps3	Cyp4v3				Acyp1						Pou2f2			D230025D16Rik	Lrrc41			Lig3
		Nxph1	Ankrd63	Mafb				Immp2l												1110017D15Rik	Tppp3	Tfb1m				Pdia5		Rps10			Malt1	Aga				Tnfaip2						Cyp2s1			Vps4a	Tmem69			Tubd1
		Gpr85	Bahd1	Zhx3				RP23-278O17.1												Ccl27a	Zfhx3	H2-DMa				Polq		Taf11			Mro	Glra3				Gm11361						Ttc9b			Terf2	Prdx1			Cltc
		2610001J05Rik	Nusap1	Srsf6				Smoc1												Gm20878	9430091E24Rik	Tnxb				Abi3bp		Zfp811			Fosl1	Scrg1				Psmg4						Eid2			Phlpp2	Toe1			Klhl11
		1110019D14Rik	Mapkbp1	Tox2				Inhba												Gm26881	Hsbp1	Zfp119a				Rbm11		BC051226			Esrra	Cers1				Gas1						Sbsn			Gan	Hectd3			Gfap
		Tspan12	Sptbn5	Jph2				Hist1h2ai												Reck	A130014A01Rik	Svil				B3galt5		Gpank1			AI846148	Slc27a1				1700001L19Rik						Usf2-ps1			Gse1	Gm12844			Map3k14
		Cped1	Ehd4	Dbndd2				Lman2												Xpa	Cdt1	Greb1l				4732491K20Rik		Tomm6os			Zbtb3	Colgalt1				Ndufs6						Kctd15			Zfpm1	Cdc20			Taco1
		Ndufa5	Stard9	Ptgis				Naa35												Sec61b	Zfp276	Pcdhb8				Zfp944		Gm10557			Asrgl1	Dnase2a				A830082K12Rik						1700008O03Rik			Spire2	Ctps			Gm6682
		Prrt4	Zscan29	Rnf114				2010111I01Rik												Wdr31	Sprtn	Pcdhb22				Nrm		Smim3			Rab3il1	Vps35				Nudt13						Josd2			Tcf25	Gm12892			Odc1
		Hilpda	Map1a	Pard6b				Ice1												Atp6v1g1	Irf2bp2	Pcdhga6				Mea1		Sh3tc2			Sdhaf2	Adgrg1				Mrps16						Gm45619			Tsnax	Rragc			Ywhaq
		Atp6v1f	Mfap1b	Nfatc2				Lhfpl2												Tmem268	Gm26592	Sema6a				2700062C07Rik		B430212C06Rik			Rfk	Cdh5				2810402E24Rik						Mamstr			Smarca4	Adprhl2			Dock4
		Mkln1os	Mfap1a	Zfp64				Fhit												Megf9	Swsap1	Ppargc1b				Sft2d3		Fau			Ppp1r3c	Lcat				Chchd1						Snhg14			Tirap	Ak2			Snx6
		9330158H04Rik	Wdr76	Bcas1				Timm23												Zdhhc21	Zfp809	Pqlc1				Gm3650		Sac3d1			Rbm20	Dus2				Plac9a						A230057D06Rik			Phldb1	Rbbp4			Prps1l3
		Ptn	Slc24a5	Dok5				Cdhr1												Cyb5rl	H2afx	Men1				A930012L18Rik		Ptar1			Apln	Dhodh				Stab1						Gm20457			Sik3	Hdac1			Klhl28
		Ndufb2	Myef2	Ppp4r1l-ps				Tnfrsf19												Ndc1	2310030G06Rik	1700018L02Rik				Dtwd2		A830019P07Rik			Arhgap36	Agt				Dph3						Mesp2			Nrg4	Eif3i			Fkbp3
		Atp6v0e2	Shc4	Rab22a				Fzd3												Lrp8os3	Ppcdc	Stn1				4930503L19Rik		Rpl10-ps6			Emd	Cwf19l2				Gnpnat1						Stard5			Anp32a	Mecr			L2hgdh
		Crhr2	Secisbp2l	Vapb				Itm2b												Scp2	Fam219b	Kcnd1				Rps6kb2		As3mt			Rab39b	Kbtbd3				Ajuba						Knop1			Coro2b	Sytl1			Pygl
		Rn7s6	Gabpb1	Stx16				Mtrf1												Btf3l4	6030419C18Rik	Pcsk1n				Malat1		Taf5			Pabpc1l2a-ps	Trpc6				Rpl13-ps3						Gm9905			Dennd4a	Id3			Acot2
		Tmem150a	Usp8	Gm4631				Ednrb												Rnf11	Rbpms2	Upf3b				Syt7		Dusp5			Tsr2	Fat3				Adra1a						Tnrc6a			Rfx7	Kdm1a			Acot1
		Tgoln1	Ap4e1	Zfp970				Cldn10												Efcab14	M5C1000I18Rik	Gm14597				Rbp4		1810030O07Rik			Arhgap6	Kank2				Gm16409						Ypel3			Nedd4	Pink1			Ptgr2
		Tex261	Ncaph	Zfp931				Ggact												Ccdc17	Fam63b	Nsdhl				Marveld1		Il13ra1				Acad8				Dnajc15						Fam57b			Gnb5	Akr7a5			Ylpm1
		Snrpg	Stard7	Lsm14b				Ghr												Hyi	Irak1bp1	Igbp1				Gm29595		Rai2				Gm10698				Spag1						Hirip3			Tbc1d2b	Gm13127			Ahsa1
		2310040G24Rik	Ttl	Ss18l1				Gm10250												Ndufs5	Dusp7	Rps4x				Bbip1		Siah1b				Nnmt				Cthrc1						Stx4a			Pls1	Vps13d			Unc79
		Tpra1	Lzts3	Cables2				Lifr												Mycbp	Gpx1	Pbdc1				Firre						Psma4				Gm3244						Tgfb1i1			Acad11	Smarca5-ps			Dync1h1
		Fam19a1	4930402H24Rik	Tcfl5				Slc1a3												Rspo1	Azi2	Asb11				C230004F18Rik						Etfa				Rps6-ps1						Lrrc27			Dock3	Fbxo2			Rapgef5
		Chl1	A730017L22Rik	Dnajc5				Nipal2												Mrps15	Ppp1r14c					Ids						Cspg4				Commd5						Lrrc56			Klhl18	Exosc10			Tbce
		Gt(ROSA)26Sor	Mavs	Zfp512b				Trhr												Rpl28-ps3	Gm9797					Gm14827						Stra6				Pnpla3						Tmem80			Nbeal2	Wrap73			Ippk
		Slc6a1	Smox	Zc2hc1a				Tnfrsf11b												Eva1b	Akap7					Gjb1						Loxl1				1700120C14Rik						Ctxn1			Snrk	Pex10			Syk
		Wnt5b	Rassf2	Tpd52				Pdgfb												Gm12940	Atoh7					Ftx						Thsd4				Pfdn5						Ccl25			Zbtb2	Ssu72			Rgs14
		Rad52	Macrod2	Zbtb10				Mgat3												Smim12	Nrbf2					Zdhhc15						Ints14				Pam16						9530085L11Rik			Bclaf1	Atad3a			Ell2
		Lrrc23	Dzank1	Zfp704				Endou												Zcchc17	2610008E11Rik					Gpr173						Ctsh				Nagpa						Gm21811			Eya4	Tubb4b-ps1			Fam169a
		P3h3	Polr3f	E2f5				Fkbp11												Laptm5	Plekhj1											Plscr1				Fopnl						6820431F20Rik			Zbtb24	Slc25a40			Trim23
		Pianp	Gzf1	Eif5a2				Emp2												Snhg12	Oaz1											Plscr2				2510002D24Rik						Golga7			Cep57l1	Armc10			Dlg5
		Tapbpl	Acss1	Zmat3				Alg3												Zdhhc18	Prdm4											Atr				Rps10-ps2						Gm17484			Rtn4ip1	Pmpcb			Gm2274
		Kcna6	Snph	Pik3ca				Ece2												Hmgn2	Cep83os											Copb2				Sec22a						Gm45470			Fam184a	Fam126a			Glud1
		Clec2d	Fam110a	Gm37459				Rfc4												Sh3bgrl3	Socs2											Lamb2				Ndufb4						Eif4ebp1			Micu1	Klhl7			Fermt2
		H2afj	Scrt2	Sox2				Cldn1												Minos1	Fam19a2											Plxnb1				Gm9843						Dusp26			Hnrnph3	Cdk5			Exoc5
		Med21	Bcl2l1	Dcun1d1				Atp13a4												Gm29367	Mbd6											Exosc7				Atp5j						BC030500			Atcay	Actr3b			Ndrg2
		Myadm	Tpx2	Fgf2				Xxylt1												Fhad1	Rnf41											Slc2a12				Tmem50b						Ell			Gna11	Ube3c			Hnrnpc
		Eps8l1	Tspyl3	Wwtr1				Apod												Gm13226	Sarnp											Med23				Zfp948						Jund			Fbxo7	Cad			Mettl3
		Nat14	Kif3b	Gm43437				Tfrc												Gm13205	Gal3st1											Gtf3c6				BC003965						Gm10649			Scyl2	Nrbp1			Dhrs4
		Tmem160	Cbfa2t2	Siah2				Hacd2												Gm13092	Lgalsl											Vsir				Gng13						Scoc			Cs	Qdpr			Mtmr9
		Snrpd2	Itch	Mbnl1				Tmem39a												Gpr153	A630052C17Rik											Icosl				AI413582						Palm3			Gm17201	Dhx15			9930012K11Rik
		Trappc6a	Trp53inp2	Gm37305				BC002163												Rpl22	N4bp3											Ilvbl				H2-M5						Mylk3			Inpp5j	Guf1			Kbtbd7
		Gemin7	Ncoa6	Rsrc1				Jam2												Ccdc27	Cdkn2aipnl											Chst11				Gm7334						Nkd1			Gas2l1	Gnpda2			Oxct1
		Pvr	2900097C17Rik	Trim2				Atp5o												5830444B04Rik	Ube2b											Mterf2				Rpl36						Gm6658			Zmiz2	Tec			Nadk2
		Gm10175	Epb41l1	Sh3d19				Gm10231												Fndc10	Fam114a2											Nup37				Clpp						Acd			Gm11993	Noa1			Sybu
		Rps19	Dlgap4	Prcc				Rnaset2a												Abcb1b	Galnt10											Utp20				C030034I22Rik						Enkd1			Glns-ps1	Polr2b			Rad21
		Lin37	Src	Hdgf				Slc22a3												Gm10108	2310058D17Rik											Lum				Gm10269						Atmin			Cyfip2	Mrpl1			Pycrl
		Psenen	Gm14176	Mex3a				1600012H06Rik												Gm10221	Gm16062											Rdh5				Rnf138						Zc3h18			Trim41	Prdm8			Oplah
		Cox6b1	Ppp1r16b	Ubqln4				Elob												Gm26894	Zfp286											Tcn2				Polr2d						Spata33			Mapk9	Klhl8			Cyc1
		Tmem147	Plcg1	2810403A07Rik				Bnip1												Gm16288	Arhgef15											Chac2				Rttn						2810455O05Rik			Phykpl	Pus1			Ncf4
		Fxyd1	Chd6	Rusc1				Psmb9												Cgref1	Gucy2e											Rack1				Mrpl11						Birc3			2017-09-08	Mvk			Atxn10
		Plekhf1	Sgk2	Shc1				D17H6S53E												Gm10461	Fgf11											Zfp354b				Bloc1s2						Ccdc82			Zfp39	Coq5			Alg10b
		Vstm2b	Ttpal	Pygo2				Spats1												Htra3	Rnasek											P4ha2				2310034G01Rik						Robo3			Usp22	Rplp0			Tuba1b
		Rps11	Rims4	Ube2q1				Mrpl14												Evc	1700016P03Rik											Acsl6				Mirt1						2610203C20Rik			Gm12291	Rfc5			Nmral1
		Dkkl1	Tomm34	Gatad2b				Ndufa11												Med28	Eral1											Gm12251				Rps12-ps3						Fxyd2			Myh8	Sdsl			Rogdi
		3110040N11Rik	Stk4	Chtop				Adgre1												N4bp2os	Slfn2											Srebf1				Llph-ps2						1110032A03Rik			Trp53	Trafd1			Snx29
		Aamdc	Zfp335	Celf3				Fez2												Chic2	Myo19											Prpsap2				Gpr34						Oaz2			Mink1	Naa25			Dgcr14
		Mrpl48	Ncoa5	Rfx5				Tmem241												Gm7467	Mrps23											Ttc19				Pin4						2310009A05Rik			Ssh2	Aldh2			Tbccd1
		Relt	Elmo2	Zfp687				Npc1												Adamts3	Ankrd40											Psmb6				Tmem29						Arpp19			Git1	Gtf2h3			Iqcg
		Lrrc51	Zfp334	Gabpb2				Yipf5												Rchy1	D030028A08Rik											BC030499				Sat1						RP24-189I2.4			Acsf2	Psph			Adcy5
		Lmo1	Zmynd8	Mllt11				Ndufs8												Gm43172	Msl1											Vtn										Lysmd2			Arhgap23	Cct6a			Kpna1
		Rpl27a	Prex1	Cdc42se1				Unc93b1												Hpse	Ptrf											Fam58b										Poc1a			Krt9	Asl			Gtf2e1
		4930431P19Rik	Stau1	Fam63a				Prdx5												Cds1	Brca1											Ggnbp2										Pcbp4			Jup	Wbscr22			Atp6v1a
		Tmem41b	Znfx1	Arnt				Gm9493												Ephx4	Arl4d											Fkbp10										6430571L13Rik			Vps25	Mdh2			Dzip3
		Adm	Gm14270	Gm26594				Fam189a2												Atp5k	Asb16											Ace										Ndufaf3			Nbr1	Dtx2			Gm6767
		Xylt1	Fam210b	Otud7b				Rnls												Zfp932	Limd2											Kcnj16										Gm42433			Plekhm1	Get4			Zbtb11
		Iqck	Rtfdc1	Ankrd34a				Adra2a												Plcxd1	Cep112it											Btbd17										Ccdc12			Rgs9	Nudt1			Btg3
		Tmem159	Taf4	Bcl9				A230072C01Rik												Iscu	Wipi1											Cd300c2										Lrrfip2			Sec14l1	Arpc1a			Dnajc28
		Cacng3	Adrm1	Sike1				Lamp2												1500011B03Rik	Fam195b											Grin2c										Gm2415			Nploc4	Asns			Cbr3
		Bcl7c	Dido1	Syt6				Tmem47												Dynll1	Foxk2											Atp5h										Ccdc13			Akap6	Mios			Serac1
		Adam12	Ythdf1	Cttnbp2nl				Zmat1												Srsf9	Fam228b											Mettl23										Zfp105			Cfl2	Aass			Zfp983
		Adgra1	9230112E08Rik	4933431E20Rik				Atg4a												Cox6a1	Cys1											Lgals3bp										Hs3st5			Baz1a	Cadps2			Nubp2
		Rplp2	Gmeb2	Fam102b																AI480526	Gm9866											Sgsh										Snx3			Mipol1	Copg2			Narfl
		Cd151	Zbtb46	Sass6																Denr	Trappc12											Adcy3										RP24-236E2.1			Nin	Nup205			Stk38
		Pet100	Zfhx4	Cnn3																Ccdc62	Prpf39											Nbas										Nus1			Trmt5	Cul1			Zfp472
		Cers4	Hey1	Fnbp1l																Arl6ip4	Prkch											Pdia6										Ccdc138			Zfyve26	Gimap6			Zfp763
		Col4a1	Gm9833	Synpo2																Dnah10	Dbpht2											Snx13										Eif4ebp2			Ttc7b	Fam188b			Zfp955b
		Lamp1	Snx16	Ndst4																Rps16-ps2	Ift43											Scfd1										Rab36			Prima1	Tigd2			Kifc1
		Thsd1	Ythdf3	Lef1																Vkorc1l1	Alkbh1											Ppp2r3c										Mif			Cep170b	Smarcad1			Hspa1b
		Sfrp1	4632415L05Rik	Cxxc4																Wbscr27	Eml5											Gemin2										Sumo3			Asb13	Immt			Dus3l
		Kcnu1	Fndc3b	1110002E22Rik																Abhd11os	Cinp											Atp5s										E130317F20Rik			Rala	Suclg1			Prkd3
		Adrb3	Tnik	Trmt10a																Rasa4	BC022687											Psma3										Stk11			F13a1	Gm6210			Rmdn2
		Unc5d	Mynn	Pdlim5																Muc3a	Gm6750											Med6										Dazap1			Phactr1	Spr			Arhgap12
		Smim18	Phc3	Gbp5																Ephb4	Net1											Ttc8										Adamtsl5			Iars	Cct7			3110002H16Rik
		Leprotl1	Prkci	Sh3glb1																D130017N08Rik	Zfp322a											Akr1e1										Mbd3			Grk6	Ruvbl1			Osbpl1a
		Bst2	Skil	Znhit6																Bri3	Pxdc1											Ryr2										Tcf3			Zfp595	Frmd4b			Gm4835
		Klf2	Gnb4	Bcl10																Atp5j2	Prelid1											Psma2										Aes			Zfp87	Lmcd1			Dmxl1
		Orc6	Gm43668	Syde2																Rpl21	Zfp935											Gpld1										Elk3			Cep72	Thumpd3			Aldh7a1
		Cnep1r1	D3Ertd254e	Fubp1																Slc46a3	Zfp367											Ly86										Cep83			Hnrnpa1l2-ps	Brpf1			Dctn4
		Aktip	Ankrd50	Zzz3																Medag	Zfp874a											Dsp										RP23-16N3.16			Mctp1	Camk1			Hmgxb3
		Pllp	Jade1	Zranb2																Zar1l	Zfp738											Tgfbi										Ccdc59			Pbrm1	Sec13			Zbtb7c
		Usb1	D3Ertd751e	Ankrd13c																N4bp2l1	Fastkd3											Erap1										RP23-413G8.2			Pnp2	D6Wsu163e			Smad2
		Bean1	Noct	Fam110b																Sdhaf3	C130071C03Rik											Pcsk1										Yeats4			Arhgef40	Ccnd2			Ppp1ca
		Nutf2	Rab33b	Tox																A430035B10Rik	Gm2956											Hapln1										Rassf3			Lats2	Cracr2a			Ssh3
		Slc7a6	Setd7	Chd7																Gm4876	Gm6740											Thbs4										Ddit3			Kctd9	Dera			Myrf
		Dynlrb2	Maml3	Plekhf2																Cav1	1700123O20Rik											Arsb										Tac2			Nefm	Tsen34			Ddb1
		Mphosph6	Foxo1	Runx1t1																2210408F21Rik	Bcl2l2											Mrps30										Gls2			Nefl	Zfp667			Osbp
		Ntpcr	Smad9	Otud6b																Gm6117	Myh7											4833420G17Rik										Myl6b			Sorbs3	Zfp954			Psat1
		Kcnk1	Spg20	Pou3f2																Chchd3	Zmym5											Tmem267										Rtn4			Hr	Lig1			Abhd17b
		Coa6	Dclk1	Map3k7																1810058I24Rik	Ints6											Ngly1										Pwwp2a			Lrch1	Ehd2			Tjp2
		Casp1	Med12l	Rragd																Clec2l	Pbk											Top2b										Rasgef1c			Vwa8	Kptn			Dock8
		Angptl6	Gm8325	Ube2j1																Mrps33	4930480K23Rik											Nkiras1										Zfp454			Klhl1	Ccdc8			Ranbp6
		S1pr2	Plch1	Akirin2																Tmem178b	Fbxo4											2700060E02Rik										D930048N14Rik			B930095G15Rik	Ppp5c			Btaf1
		Yipf2	Gmps	Chmp5																Trbc1	Skp2											Itih3										Lyrm7			Card6	Ccdc61			Noc3l
		Prkcsh	Kcnab1	Nfx1																Trbc2	Dap											Gdf10										Sh3bp5l			Pdzd2	Cd3eap			Zfp518a
		Jam3	Schip1	Dcaf12																Trpv6	Zfpm2											Ero1l										9330160F10Rik			Drosha	Ppp1r13l			Scd2
		Opcml	Gucy1a3	Ubap1																Cycs	Tmem65											Tmem260										Borcs6			Fam49b	Relb			Prdx3
		Gm10177	Fhdc1	Fam219a																Lsm5	Peg13											Parp2										Gm45606			Zfat	Zfp235			Usp9x
		Clmp	Rrnad1	Gm10601																Pyurf	Gm3150											Osgep										Rflnb			Rac2	Zfp111			Jade3
		Oaf	Mef2d	Gm13302																Particl	Zfp251											Chd8										Coro6			Card10	Pafah1b3			Ube2a
		Mcam	5830417I10Rik	Gm13303																Kcmf1	1110038F14Rik											Tm9sf1										Rab34			Triobp	Rab4b			Cul4b
		Ccdc153	Gon4l	Gm21093																Tmsb10	Micall1											Ift88										Gm11196			Pla2g6	Coq8b			Gm14680
		Cadm1	Ash1l	Gm37530																Pole4	Josd1											Fdft1										Lyrm9			Tab1	Pgam1-ps2			Xlr3a
		Gm5617	Kcnn3	Gm3892																Wbp1	Cbx6											Scara3										Rpl13-ps1			Mkl1	Sertad3			Gm14685
		Rpl10-ps3	Adar	Gm10600																Bola3	Atf4											Gm21685										Ska2			Tubgcp6	Zfp850			Vbp1
		Commd4	Tpm3	Fam205a3																Emx1	Srl											Esd										Tspoap1			Shank3	Psmc4			Prrg1
		Gm17322	Dennd4b	Fam205a2																Pradc1	Mpv17l											Akap11										Dynll2			Scaf11	Plekhg2			Gk
		Fam96a	Gm4202	Fam214b																Snrnp27	Ypel1											Pcdh20										2010015M23Rik			Nckap5l	Paf1			Ogt
		Aph1c	Snx27	Tln1																2610306M01Rik	Tango2											Gpc5										Mbtd1			Racgap1	Nfkbib			Phka1
		Gtf2a2	Tuft1	Rgp1																Chchd4	Cep19											Prlr										Rsad1			Hnrnpa1	Hnrnpl			Pgk1
		C920006O11Rik	Pogz	Rnf38																Eif4e3	Fbxo45											Rxfp3										Spop			Coro7	Uba2			Bhlhb9
		Hmgn3	Prune1	Trmt10b																Gpr27	Rnf168											Cpq										Pcgf2			Pmm2	Pepd			Mum1l1
		Atp1b3	Golph3l	Shb																Gm15631	Chmp2b											Mtdh										Arl5c			Cpped1	Rhpn2			Tbc1d8b
		Abhd14a	Mcl1	Stx17																Lhfpl4	Scaf8											Angpt1										Krt222			Pdxdc1	Ccne1			Morc4
		Shisa5	Prpf3	Rad23b																9530062K07Rik	Oaz1-ps											Eif3e										Krt12			2900011O08Rik	Ctu1			Amot
		Rpsa	Lix1l	Fam206a																Zfp637	Pbx2											Tmem74										A830036E02Rik			Arvcf	Tbc1d17			Lrch2
		Tmem42	Acp6	Pole3																Cacna2d4	Gm8741											Enpp2										Wnk4			Cdc45	Pnkp			Fam120c
		Gm15536	Pde4dip	Rgs3																Mrpl51	Cd2ap											9130401M01Rik										Slc25a39			Ufd1l	Prmt1			Ddx3y
		Lrp11	Wars2	Col27a1																A830011K09Rik	Slc25a23											Ift27										Gjc1			Ehhadh	Aldh16a1
		Ust	Vangl1	Psip1																Gm15706	Spast											Elfn2										1700052K11Rik			Mb21d2	Snrnp70
		Rps12	Trim33	Hook1																Tmtc1	Pigf											Sun2										Cep95			Spice1	Grwd1
		Gm9803	Hipk1	Nfia																Etfbkmt	Wac											Polr3h										Hn1			Tfg	Saal1
		Ggt5	Dclre1b	Kank4																Cacng7	Ccny											Srebf2										Ten1			Dopey2	Tsg101
		Derl3	Rsbn1	Gm12791																Prpf31	Iws1											Mlc1										2810410L24Rik			Afdn	Prmt3
		Pofut2	Magi3	Gm12799																Leng8	Ube2d2a											Slc2a13										Fkbp1b			Lnpep	Cyfip1
		Pttg1ip	Capza1	Sgip1																Ptprh	Ablim3											Slc11a2										Pqlc3			Zfp758	AU020206
		Prtn3	Fam212b	Dab1																Gm15510	Gm7276											Aaas										3110053B16Rik			9530082P21Rik	Mrpl46
		1600002K03Rik	Chia1	Tceanc2																Zfp580	Adnp2											Itga5										Zfp125			Fbxl16	Rlbp1
		Uqcr11	AI504432	Lrp8os2																Selenow	Cbln2											Adcy9										Atxn7l1			Wdr90	Il16
		Adat3	Rbm15	Gm17354																Plaur	Gm45871											Rsl1d1										Pnn			Brpf3	Eed
		Timm13	Ahcyl1	Cdkn2c																Gm9844	Cnih2											Yars2										Sav1			Cpne5	Nars2
		1190007I07Rik	Gstm3	Gpbp1l1																Tmem91	Ttc9c											Eif2b5										Vti1b			Kank3	Eif3f
		Ckap4	Gpsm2	Akr1a1																Capn12	Lbhd1											Lsg1										2310015A10Rik			Trim26	Ctr9
		1810014B01Rik	Vav3	Btbd19																Kcnk6	D030056L22Rik											Lmln										Gm28370			Gtpbp2	9030624J02Rik
		Snrpf	Agl	AU022252																Ppp1r14a	Gm6563											Itgb5										Glrx5			Mocs1	Crym
		RP23-137I3.2	Gclm	Ybx1																C230062I16Rik	Blnk											Adprh										Bcl11b			Daam2	Uqcrc2
		RP23-70B19.5	Bcar3	Rimkla																Sdhaf1	Avpi1											Lsamp										Degs2			Tbc1d5	Kdm8
		Lemd3	Pde5a	Frg2f1																Fxyd7	Golga7b											Ccdc80										Rtl1			Satb1	Eif3c
		Slc16a7	Usp53	Foxj3																Pdcd5	Scd3											Arl6										Xrcc3			Rfx2	Coro1a
		Tspan31	Dapp1	Scmh1																Gm6851	Slc18a2											Adamts1										Gm10357			Mettl4	Zfp747
		B4galnt1	Ddah1	Cited4																1700028J19Rik	Emx2os											Cryzl1										Elmo1			Fzd8	Ctf1
		Nxph4	Ssx2ip	Rims3																Ccdc155	Xiap											Kcne2										AK157302			Usp14	Bckdk
		A430046D13Rik	Prkacb	Smap2																Ftl1	Smim10l2a											Ttc3										Gmnn			Gm6277	Kat8
		Dnajc14	Ttll7	Pou3f1																Fancf	Pdzd4											Bace2										5033430I15Rik			Ankrd29	Gm9299
		Bloc1s1	Dnajb4	Fhl3																Gm9962	Zfp711											Pacrg										Cltb			Elp2	Mcmbp
		Olfr784	Erich3	Inpp5b																Mcee	Tceal9											Zfp677										Isca1			AW554918	Wdr11
		Emid1	Clvs1	Mtf1																Fam189a1	Eif1ax											Pkmyt1										Ptch1			Map3k2	Oat
		Znrf3	2610301B20Rik	Meaf6																Lysmd4												Atp6v0c										Zfp369			Apc	Ppp2r2d
		Gck	Pdp1	Ago1																4833412C05Rik												Mdga1										4930525G20Rik			Cpt1a	Dpysl4
		Snhg15	Usp45	5730409E04Rik																Fam174b												Cyp4f14										Gm10037			Grk2	Echs1
		Gm11989	Faxc	Zscan20																Gm9885												Cyp4f13										Glrx			Pacs1	Ric8a
		Sec61g	Klhl32	Phc2																Mir9-3hg												Cd320										Gm4117			Cfl1	Psmd13
		C1d	Ankrd6	Bsdc1																Rps17												H2-K1										Zbed3			Neat1	Gm15542
		Vps54	Rngtt	Marcksl1																Hikeshi												H2-Aa										Rgs7bp			Smarca2	Rnh1
		5730522E02Rik	Zfp292	Epb41																E230029C05Rik												C4b										Ube2e2			Ifit3b	Timm44
		Acyp2	Aptx	Gmeb1																Crebzf												Pla2g7										Fam149b			Plce1	Zfp958
		Bod1	Fam205a4	Phactr4																Gdpd5												Mrpl2										Socs4			Pdlim1	Cars2
		Gm12174	Gm3883	Dnajc8																Anapc15												Ndufv2										Sdr39u1			Cox15	Cul4a
		Mrnip	Phf24	Ppp1r8																Lamtor1												Ltbp1										Fam124a			Fbxw4	Grtp1
		Zcchc10	Dnajb5	Stx12																Pgap2												Vit										Gm2824			Nudt10	Cdc16
		Hint1	Tesk1	Fam76a																Taf10												Adcyap1										Rpl7a-ps3			Prickle3	Fbxo25
		Guk1	Clta	Cep85																Akip1												Snrpd1										Zfp706			Tfe3	Erich1
		Mrpl55	Polr1e	Pafah2																1110004F10Rik												Abhd3										Kcnq3			Dcaf12l1	Fnta
		Pemt	Dcaf10	Mtfr1l																Lyrm1												Aqp4										Ptp4a3			Htatsf1	Slc25a4
		Rps13-ps5	Coro2a	Srrm1																9030407P20Rik												Ttr										2810039B14Rik			Abcd1	Wdr17
		Pigl	Invs	Asap3																BC030336												Tmem173										Cyhr1			G6pdx	Hpgd
		Tvp23b	Tex10	Zfp46																Mettl9												Cd74										Ppp1r16a			Klhl15	Gm9755
		Stx8	Fsd1l	Luzp1																Hs3st2												Csf1r										Txn2			Nono	Ints10
		Efnb3	Zfp462	Hp1bp3																Zkscan2												Mppe1										1500009C09Rik			C77370	Gmip
		Tmem256	Ctnnal1	Necap2																Nupr1												Slc14a1										Fam19a5			Drp2	Armc6
		Ctdnep1	Epb41l4b	Arhgef19																Slx1b												Lrp5										Rabl2			Frmpd3	Ddx49
		Slc16a13	Ptpn3	Zbtb17																Bola2												Pitpnm1										Gxylt1			Kctd12b	Sin3b
		Spns2	Ptbp3	Casp9																Kif22												Yif1a										Slc38a4			Ptchd1	Mcm5
		Emc6	Hsdl2	Efhd2																2017-09-01												Pola2										Kansl2			Cdkl5	Nr3c2
		Rilp	Snx30	Kazn																Cox6a2												Arl2										Pou6f1			Ap1s2	Prmt9
		Slc43a2	Zfp618	Znf41-ps																Gpr26												Fads2										Fignl2				Mmaa
		Gm12338	Cdk5rap2	Spsb1																Mettl10												Fads1										Zfp740				Dcaf15
		Gm12571	Gm11226	Smim1																9430038I01Rik												Tmem132a										Prr13				Farsa
		Evi2a	Ttc39b	Prdm16																Mapk1ip1												Vps13a										Tekt5				Rnaseh2a
		Asic2	Dennd4c	Gm13111																Zfp511												Anxa1										Ntan1				Fbxw9
		Atp5l-ps2	Mllt3	Ski																Fuom												Gm5514										Hic2				Lonp2
		Fam134c	Elavl2	Prkcz																Bet1l												Ifit3										Camk2n2				Heatr3
		Gm11627	Mysm1	Cfap74																Ifitm3												Wdr45										B130034C11Rik				Snx20
		Crhr1	Gm12696	1500002C15Rik																Hras												Mcts1										Brwd1				Nup93
		Mrc2	Usp1	Cdk14																Polr2l												Rab33a										Dynlt1a				Polr2c
		1810010H24Rik	Raver2	Dmtf1																Fcor												Gpc4										Tmem181b-ps				Kifc3
		Slc39a11	Dnajc6	Magi2																Fam155a												Hprt										Prdm9				Rrad
		Fam104a	Wdr78	Srpk2																Coprs												Bgn										Hn1l				Atp6v0d1
		Gm11703	Prkaa2	Nupl2																Gm10699												Apoo										2810468N07Rik				Prmt7
		Rps11-ps2	Acot11	Agap3																Gm45453												Heph										Ccdc167				Tango6
		Myadml2	Zyg11b	Xrcc2																Plpp5												Eda										Zfp414				Cog8
		Cd7	Zfyve9	3110082J24Rik																Rnf122												Slc16a2										Atp6v1g2				Cog4
		Metrnl	Osbpl9	Drc1																Ubxn8												Hsd17b10										Tcf19				Wdr59
		1700030C10Rik	Eps15	Zfp512																Gm45653												Egfl6										Znrd1				Nudt7
		Pxdn	Faf1	Gm43660																Zdhhc2																						Vegfa				Plcg2
		Sypl	Atpaf1	Fosl2																Ankrd37																						Usp49				Hsdl1
		Efcab10	Nsun4	Ctbp1																Gm8623																						Rab12				Mvd
		Twist1	Pik3r3	Uvssa																Dctd																						Ypel5				Ctu2
		Sptssa	Mmachc	Nsd2																Mfap3l																						Esco1				Cpne7
		3110056K07Rik	Zswim5	Adra2c																Pbx4																						Rbbp8				Gnpat
		Gpr135	Ebna1bp2	Ablim2																Ndufa13																						A830052D11Rik				Med17
		Rtn1	Exo5	Mrfap1																Nr2c2ap																						Gm10548				Eif3g
		Sgpp1	Cap1	Ppp2r2c																2810428I15Rik																						Ppp2r2b				Dock6
		Churc1	Hpcal4	Jakmip1																Arrdc2																						Snx24				Ecsit
		Entpd5	9930104L06Rik	Bod1l																Ccdc124																						Zfp608				Ncapd3
		Zdhhc22	Thrap3	Cpeb2																Rpl18a																						Mbd2				Fam118b
		Slirp	Ago3	Lcorl																Ocel1																						Gm10524				Ddx25
		D130020L05Rik	Ago4	Ccdc149																Plvap																						Tshz1				Vwa5a
		Chga	Zmym4	Gm9954																Gm10282																						Gng3				Acat1
		Tmem251	Sfpq	0610040J01Rik																Gm2225																						4430402I18Rik				Wdr61
		Mirg	Zmym1	Klf3																Lsm6																						9930021J03Rik				Edc3
		2010107E04Rik	Dlgap3	Rhoh																2210011C24Rik																						2700046G09Rik				Map2k5
		Gm10029	Trim62	Bend4																D8Ertd738e																						Ubtd1				Rpl4
		Nid1	Rnf19b	Kctd8																Dand5																						Morn4				Rab11a
		Stard3nl	Hpca	Slain2																Gm42031																						Slc25a28				Clpx
		Gm11353	S100pbp	Usp46																Gm2694																						Mxi1				Spg21
		Nrn1	C77080	Cep135																Gm45428																						Zfp950				Snx1
		Nol7	Lck	C530008M17Rik																C78859																						Csf2ra				Gsta4
		Cks2	Txlna	Sowahb																Sap18b																						Cdr1				Phip
		Caml	Khdrbs1	Cnot6l																Cmtm4																						Hmgb3				Bckdhb
		Zfp273	Pum1	Gm42902																Fam96b																						Slc6a8				Mrps22
		Adgrv1	Tmem200b	A830010M20Rik																Gm10073																						Pdzd11				Armc8
		Cox7c	Sesn2	Pcgf3																Txnl4b																						Cldn34c1				Nck1
		Tmem167	Eya3	Cplx1																St3gal2																						Armcx4				Ky
		Rps23	Themis2	4930522L14Rik																Fa2h																						Tceal6				Topbp1
		Scamp1	Ahdc1	Golga3																1190005I06Rik																						Tceal5				Alas1
		Gm9776	Wasf2	Srrd																Gm20735																						Tmsb15b1				Nprl2
		Tbca	Wdtc1	Grk3																Gm45898																						Kantr				Zmynd10
		Gcnt4	Arid1a	2900026A02Rik																Arv1																						Zrsr2				Rassf1
		Btf3	Ldlrap1	Mmab																Tmem123																						Mid1				Rbm5
		Cartpt	Clic4	Fam222a																Fam76b																						G530011O06Rik				Gmppb
		Ccnb1	Rcan3	Gltp																Kdm4d																						Gm21887				Impdh2
		Ercc8	Stpg1	Ankrd13a																Vstm5																										Wdr6
		Slc38a9	Srsf10	Rnf10																Taf1d																										Ip6k2
		D830030K20Rik	Eloa	Msi1																Ubl5																										Elp6
		Rps24	Htr1d	Cit																Pin1																										Cnot10
		Tmem110	Zbtb40	Srrm4																Rp9																										Acaa1b
		Vstm4	Sh2d5	Taok3																Herpud2																										Slc25a38
		Bmpr1a	Kif17	Tesc																B3gat1																										Mtrf1l
		Gm7206	Fam43b	Med13l																Ei24																										Nup43
		Rnase4	Vwa5b1	Sh2b3																Vsig2																										Pex7
		Rps19-ps2	Spen	Cux2																Rps25																										Lama2
		Mrpl52	Ddi2	Fam216a																Tmem25																										RP23-331E5.10
		Pabpn1	Prdm2	Camkk2																Atp5l																										Clvs2
		Mrpl57	Pramef8	Bcl7a																Timm8b																										Zufsp
		Zdhhc20	Gm13034	Cdk2ap1																Cplx3																										Hdac2
		Bmp1	Zfp992	Kmt5a																Cyp11a1																										Fig4
		Commd6	Tardbp	Zfp664																Cd276																										Mical1
		Fam134b	Dffa	Rabgef1																B930082K07Rik																										Pdss2
		Cox6c	Nmnat1	Caln1																Rplp1																										Mcm9
		Ebag9	Rere	Gatsl2																Itga11																										Hsf2
		Mal2	Camta1	Bcl7b																2300009A05Rik																										Ddx50
		Nov	Klhl21	Srrm3																Snapc5																										Tfam
		Pvt1	Nol9	Cux1																Tipin																										Prmt2
		Chrac1	Cep104	4933404O12Rik																Ccpg1os																										Itgb2
		Them6	Tprgl	Gigyf1																Hcrtr2																										Pfkl
		Foxred2	Pank4	Nyap1																Cox7a2																										Pwp2
		Lgals1	Gnb1	Mepce																A330041J22Rik																										Ptbp1
		Cby1	Nadk	Mafk																Ripply2																										Thop1
		Rps19bp1	Dvl1	Psmg3																Mthfsl																										Rtcb
		Chadl	Acap3	Rbak																Mthfs																										Actr6
		Mei1	Perm1	Zkscan5																Gk5																										Lta4h
		Ccdc134	Plekhn1	Rnf6																Anapc13																										Cep290
		Slc48a1	Cdk6	Wasf3																Rpl29																										Tbc1d15
		Faim2	Ankib1	Usp12																Gpr62																										Cct2
		Cela1	Akap9	Gm6054																Tma7																										RP23-468J15.4
		Mfsd5	Gtpbp10	Gm15721																Rps27rt																										Xpot
		Rpl39-ps	Rundc3b	Mtus2																Cmc1																										Prim1
		1700037C18Rik	Gnai1	Gm15411																Mobp																										Timeless
		Grin2a	Gm6560	Slc25a13																Ss18l2																										Pan2
		Cebpd	Rint1	Dlx6os1																Higd1a																										Drg1
		Car15	Smarcd3	Dlx6																RP23-361B11.3																										Patz1
		St6gal1	Kmt2c	Dlx5																Zdhhc3																										Cabp7
		Rpl35a	Rbm33	Foxp2																Tmem158																										Nipsnap1
		Fam162a	Tyms	Gm26809																Gm16148																										Pold2
		Fstl1	Otof	Wasl																Cenpw																										Ddx56
		Timmdc1	Dpysl5	Tmem229a																Nkain2																										Gm11992
		Alcam	Preb	Gm42547																Fam229b																										Rab1a
		Rpl24	Ift172	Gcc1																Slc16a10																										Ugp2
		Mir99ahg	Ppp1cb	Ube2h																9030612E09Rik																										Wdpcp
		9430092D12Rik	Pisd	Cep41																Slc35f1																										Cct4
		Mis18a	Prr14l	Mtpn																Pkib																										Ppp4r3b
		Pigp	Rnf4	Mkrn1																Anapc16																										Asb3
		Wrb	Gm43860	Braf																Pcbd1																										Gabrb2
		Tmem242	Sh3tc1	Casp2																Reep3																										Ublcp1
		Gtf2h5	Afap1	Zyx																Ube2d1																										Gm12231
		Sft2d1	Gm1043	Ezh2																Cisd1																										Cnot8
		Wtap	Zfp518b	Zfp777																Chchd10																										Snap47
		Tnfrsf12a	Fbxl5	Zfp746																RP24-373J20.5																										Flcn
		Paqr4	Ppargc1a	Gm44696																Pcsk4																										Cops3
		Nme4	Rbpj	Zfp467																Reep6																										Rasd1
		Gm8186	Tbc1d1	AI854703																Izumo4																										Drc3
		Ergic1	Klhl5	Jazf1																Jsrp1																										Dnah9
		Rsph1	Pds5a	Creb5																Mrpl54																										Cfap52
		Ndufa7	Limch1	Chn2																Ankrd24																										Per1
		Rps18	Slc10a4	Znrf2																1500026H17Rik																										Alox12b
		Agpat1	Gm42732	6430584L05Rik																Ntn4																										Eif4a1
		Aif1	Dcun1d4	Nap1l5																Mrpl42																										Pld2
		Ier3	Fip1l1	Gng12																Mettl25																										Tekt1
		H2-T22	Clock	Rmnd5a																RP23-240M3.1																										Glod4
		H2-T10	Uba6	Chmp3																Ptprb																										Mrm3
		Rpp21	Grsf1	1700003E16Rik																Kcnmb4																										Nxn
		Oard1	Thap6	Mob1a																5330438D12Rik																										Gm12346
		St6gal2	G3bp2	Tet3																Llph																										Ints2
		Zfp959	Sdad1	Dusp11																RP23-316F10.2																										Ptrh2
		Twsg1	Nup54	4930553P18Rik																Ndufa4l2																										Smg8
		Crim1	2017-09-11	Pcbp1																Myl6																										Phb
		Cox7a2l	Gm43682	Mxd1																Rps26																										Scrn2
		B4galt6	Bmp2k	Efcc1																Gm12592																										Psmd3
		Epb41l4aos	Prkg2	H1fx																8430429K09Rik																										Hap1
		Reep5	Lin54	Gm26588																Pla2g3																										Tubg1
		Reep2	Gm43270	Mitf																Selenom																										Becn1
		Ecscr	Aff1	Foxp1																Ube2d-ps																										Gm11585
		Pfdn1	Zfp644	Rybp																H2afv																										Plcd3
		Sra1	Evi5	Vhl																Ramp3																										Psmd12
		Pcdhb7	Dgkq	Vgll4																Gm12091																										Fdxr
		Ap3s1	Gtpbp6	Zfand4																Gm8098																										Hid1
		Rps14	Pgam5	Zfp422																Gm12166																										Nt5c
		Rpl17	Gm42595	Rassf4																Havcr2																										Nup85
		Hsbp1l1	Ulk1	Wnk1																Mgat1																										Mrpl38
		Rce1	Ttc28	Phc1																Nhp2																										Jmjd6
		Zdhhc24	Pitpnb	Foxj2																Uqcrq																										Rptor
		Drap1	Mn1	Necap1																Gpx3																										Rac3
		Efemp2	Sgsm1	Cd4																Hist3h2ba																										Dus1l
		Gpr137	Ung	Zfp384																2310033P09Rik																										Gm11793
		Fkbp2	Acacb	Tigar																Map2k3os																										Tbcd
		Cox8a	Myo1h	Gm42741																Gm45605																										Wdr35
		Rtn3	Kctd10	Foxm1																2410006H16Rik																										Pgk1-rs7
		Slc22a6	Rab35	Fkbp4																Pmp22																										Ddx1
		B3gat3	Hspb8	Atf7ip																Rpl26																										Gm6736
		Rom1	Pebp1	Lmo3																Hes7																										Iah1
		Cyb561a3	Ksr2	Aebp2																Chd3os																										Grhl1
		1110059E24Rik	Nos1	Sox5																Naa38																										Rrm2
		Gm10053	Rbm19	Rassf8																Tnfsf12																										Pik3cg
		Cbwd1	Ptpn11	Ccdc91																Med11																										Nubpl
		Fgfbp3	Pptc7	Oscar																Spag7																										RP24-226N22.1
		Exosc1	Gm42829	Ppp1r12c																4930563E22Rik																										Srp54b
		Entpd7	Rhof	Cox6b2																1700016K19Rik																										Psma6
		Erlin1	Setd1b	Rpl28																Timm22																										Sstr1
		Wbp1l	Mlxip	Zfp579																Rpl36-ps2																										Gm6395
		Atrnl1	Vps33a	Fiz1																Rpl23a																										Syne2
		Gm9432	Hip1r	Gm45133																Proca1																										Mthfd1
		Elk1	Sbno1	U2af2																Ift20																										Hspa2
		Rpl39	Rilpl1	Epn1																Tmem98																										Eif2s1
		Ndufa1	Ubc	Zim1																Gm22068																										Dpf3
		Tmem255a	Dhx37	Zfp329																Mmd																										Riox1
		Mmgt1	Rimbp2	Gltscr1																Abcc3																										Acot3
		Prrg3	Zfp11	Ccdc9																Mrpl27																										Coq6
		Lage3	Gbas	Bbc3																Gm9796																										Aldh6a1
		Efnb1	Kctd7	Zc3h4																Zfp652os																										Rps6kl1
		Cox7b	Auts2	Gng8																Atp5g1																										Tdp1
		2810403D21Rik	Clip2	Calm3																Copz2																										Ppp4r3a
		Armcx5	Eif4h	Opa3																Cisd3																										Ifi27
		Arxes2	Ywhag	Fosb																Atp5l2-ps																										Wdr20
		mt-Te	Trim56	Ppp1r37																Rpl23																										Mok
			Srrt	Zfp109																B230217C12Rik																										Trmt61a
			Zkscan1	Gsk3a																Igfbp4																										Idi1
			Zfp113	Egln2																Krt20																										Heatr1
			Ap4m1	BC024978																Myl4																										Gm2423
			Zfp68	Numbl																2017-03-10																										Cdkal1
			Prkar1b	Map3k10																Snord104																										Uqcrfs1
			Dnaaf5	Zfp607b																Cacng4																										Gmds
			Snx8	Mrps12																Slc16a6																										Serpinb6a
			Iqce	Fam98c																Rpl38																										Tubb2a
			Amz1	Zfp260																Ttyh2																										Tubb2b
			Foxk1	Zfp146																Sumo2																										Fars2
			Radil	Capns1																Mxra7																										Pak1ip1
			Wipi2	Kmt2b																Gm8624																										Fbxw17
			Fbxl18	Gm4673																Ndufaf8																										Nsun2
			Fscn1	Lsm14a																0610009L18Rik																										Nkd2
			Lnx2	Cebpa																Arl16																										Ttc37
			Pan3	Tshz3																Anapc11																										Mblac2
			Ubl3	Uri1																Cenpx																										Rasa1
			Katnal1	1600014C10Rik																Rab10os																										Iqgap2
			Hsph1	Zfp975																Ptrhd1																										Arhgef28
			Peg10	Nr1h2																Bnip3l-ps																										Gtf2h2
			Tac1	Akt1s1																Gm19196																										Dimt1
			Zfp800	Gm45629																2410018L13Rik																										Smim15
			Rbm28	9330162G02Rik																RP24-345F16.1																										Plk2
			Ahcyl2	Gm38393																Tmem18																										Fgf10
			Klhdc10	Snrpn																RP23-149L23.1																										Slc25a5-ps
			Mkln1	Gm7367																3110039M20Rik																										Psmd6
			Cald1	Gm44718																RP24-142I9.2																										Ecd
			Cnot4	Klf13																Trappc6b																										Anxa7
			Dgki	Mef2a																Rps29																										Gm2260
			Zc3hav1	Arrdc4																9330151L19Rik																										Arhgef3
			Ttc26	A730056A06Rik																RP24-454N4.2																										Actr8
			Luc7l2	Rhcg																Tmem229b																										Capn7
			Kdm7a	Gm44950																RP23-454I20.1																										Hacl1
			E330009J07Rik	Arpin																Isca2																										Wdhd1
			Zfp786	Zfp710																Rpl30-ps8																										Apex1
			Zfp398	Hddc3																Gon7																										Gm6755
			Lrrc61	Crtc3																Rian																										Psmb5
			Repin1	Zfp592																Rps19-ps6																										Carmil3
			Zfp775	Fam103a1																2810029C07Rik																										Cpne6
			Tra2a	Hdgfrp3																Apopt1																										Gmpr2
			Dfna5	Mex3b																Crip1																										Rabggta
			Osbpl3	Mesdc1																Ighg2c																										Nop9
			Skap2	Picalm																Ighm																										Cryl1
			Wipf3	Rab30																Yae1d1																										Micu2
			Scrn1	Map6																Nkapl																										Mipep
			Pde1c	Rnf169																Gm11273																										Kpna3
			Avl9	Ucp2																Hist1h2bc																										Entpd4
			Kbtbd2	Fam168a																9330162012Rik																										Rcbtb2
			Ppm1k	Dnhd1																Dcdc2a																										Kctd4
			Lancl2	Tub																A330102I10Rik																										Sugt1
			Fam13a	Zfp143																Dusp22																										Rps3a2
			Gadd45a	Wee1																Slc22a23																										Pibf1
			Tcf7l1	Rnf141																Lyrm4																										Ipo5
			Tacr1	Mrvi1																Fam8a1																										Nup155
			Paip2b	Eif4g2																A330048O09Rik																										Ranbp3l
			Zfp638	Sox6																A830005F24Rik																										Amacr
			Cyp26b1	B230311B06Rik																6720427I07Rik																										Myo10
			Sfxn5	Dcun1d3																Fam120aos																										Gm6361
			Rab11fip5	Usp31																Card19																										Cct5
			Fbxo41	Ubfd1																Higd2a																										Vps13b
			Aak1	Maz																Tspan17																										Dcaf13
			Cnbp	Cd2bp2																Fam193b																										Nudcd1
			Rab7	Zfp553																Pcbd2																										Eif3h
			Fgd5	Zfp771																Idnk																										Taf2
			Prickle2	E430018J23Rik																Uqcrb																										Wdyhv1
			Magi1	Prr14																Srd5a1																										Gm7935
			Kbtbd8	Fbrs																Mrpl36																										Tonsl
			Srgap3	Zfp629																Gm15912																										Gpt
			Ttll3	Fbxl19																Ccdc127																										Eif3d
			Gm7292	Setd1a																Gm4149																										Gcat
			Hnrnpf	Zfp668																Gm6311																										Eif3l
			Rasgef1a	Itgam																Rfesd																										Nfam1
			Ankrd26	Inpp5f																2810049E08Rik																										Sult4a1
			Ccdc77	Plekha1																Serinc5																										Samm50
			Bcl2l13	2310057M21Rik																F2r																										Hdac10
			Tuba8	Fam53b																Gm5453																										Dbx2
			Iqsec3	Fam196a																Serf1																										Rapgef3
			Lpcat3	Bnip3																Ak6																										Ddx23
			Ptpn6	Jakmip3																Mrps36																										Prkag1
			Kcna5	Nlrp6																Plpp1																										Atg101
			Tpi-rs11	Rassf7																Mocs2																										Krt73
			Parp11	Cend1																Nim1k																										Tns2
			Prmt8	Zfp358																3830406C13Rik																										Trap1
			Tulp3	Prr36																6230400D17Rik																										Nudt16l1
			Arhgdib	Arglu1																Nrg3																										Anks3
			Eps8	Ankrd10																Nedd8																										Rrn3
			Pde3a	Sox1																Gm16973																										Prkdc
			Recql	Proz																Gjb2																										Pkp2
			Etnk1	Dcun1d2																Fgf9																										Spag6l
			Bcat1	Tfdp1																Dleu2																										Top3b
			4930479D17Rik	Zmat4																Dleu7																										Ppil2
			Ppfibp1	Tacc1																Msra																										Klhl22
			Klhl42	Nsd3																Bin3																										Abcf3
			Ipo8	Bag4																Reep4																										Psmd2
			Dennd5b	Hook3																Gm4285																										Fam131a
			Bicd1	Thap1																Serp2																										Gm6467
			Gm7353	Zfp703																Ccdc122																										Eif4a2
			Cnot3	Ppp2cb																Rpl36a-ps1																										Zbtb20
			Leng1	Tnks																Gm10076																										Gm9816
			Hspbp1	6430573F11Rik																Sub1																										4930453N24Rik
			Brsk1	Dlc1																Snhg18																										Gbe1
			Peg3	Mtus1																Rpl30																										Ltn1
			Usp29	Fam149a																Eny2																										Cbr1
			Zfp772	Cfap97																Med30																										Rsph3b
			Zfp446	Stox2																Tatdn1																										Tcp1
			Trim28	Sh3rf1																Lynx1																										Psmb1
			Sae1	Naf1																Pvalb																										Zfp54
			Dact3	Psd3																Dnal4																										Gm10226
			Pnmal1	Zfp930																Phf5a																										Zfp943
			Gm42372	Gatad2a																Smdt1																										Thoc6
			Mark4	Slc25a42																Ndufa6																										Pgp
			Bloc1s3	Fkbp8																Yaf2																										Tbl3
			Zfp114	Babam1																Zcrb1																										Hagh
			Irgq	Tpm4																Slc38a1																										Ift140
			Cic	Eps15l1																Slc38a2																										Wdr24
			Shkbp1	Hmgxb4																Tmem106c																										4930526A20Rik
			Zfp60	Hmox1																Olfr287																										Slc39a7
			Zfp780b	Zfp827																B130046B21Rik																										Hspa1a
			Dyrk1b	Otud4																Cox14																										Vars
			Samd4b	Hhip																C330013E15Rik																										Aars2
			Gmfg	Inpp4b																Igfbp6																										Xpo5
			Sirt2	Asf1b																Tarbp2																										Polr1c
			Spred3	Samd1																Ppp1r1a																										Ubxn6
			Dpf1	Rfx1																Dexi																										Trip10
			Zfp84	Zswim4																Ccdc116																										Fer
			Zfp790	Lyl1																Ccdc74a																										Wdr43
			Clip3	Rad23a																Dgcr6																										Ttc27
			Nfkbid	2310036O22Rik																1300002E11Rik																										Ndufaf7
			Arhgap33	N4bp1																Tmem44																										Cyp1b1
			4931406P16Rik	Sall1																Pigz																										Msh6
			Zfp507	Chd9																0610012G03Rik																										Cul2
			Gm45768	Zfp319																Heg1																										Ttc39c
			Zfp536	Gm45851																Cox17																										Wdr36
			Gm26526	A330008L17Rik																Eva1c																										Matr3
			Zfp976	Cbfb																Smim11																										Hars
			Nup62	4931428F04Rik																Setd4																										Pcdhgc3
			Dhdh	Gm45763																Lca5l																										Pcdhgc5
			Sphk2	Ctcf																Pcp4																										Cdo1
			Hps5	Carmil2																Tmem181a																										Hsd17b4
			Uevld	Gfod2																Dynlt1b																										Snx2
			Spty2d1	Thap11																Mpc1																										Txnl1
			Nav2	Pskh1																Mrpl18																										Myo5b
			Gm10297	Nfatc3																Hcfc1r1																										Hdhd2
			B230209E15Rik	Slc7a6os																Flywch2																										Ndufv1
			Mkrn3	Sntb2																Mir5125																										Gstp1
			Tarsl2	Cyb5b																Prss22																										Pcx
			Aldh1a3	Nfat5																Rab26os																										Ap5b1
			Asb7	Atxn1l																Msrb1																										Ehd1
			Lins1	Ddx19b																Gm10012																										Cdc42bpg
			Synm	Znrf1																Arhgdig																										Nudt22
			Nr2f2	Wwox																Rgs11																										Polr2g
			Chd2	Maf																Cuta																										Eef1g
			Akap13	Gm45733																Uqcc2																										Mrpl16
			Klhl25	Necab2																Ndufv3																										Cep78
			Pde8a	6430548M08Rik																Zfp101																										Gm10819
			Btbd1	Mthfsd																2017-03-02																										Fxn
			Arnt2	Map1lc3b																Gm17251																										Pgm5
			Dlg2	Zcchc14																Rps28																										Pum3
			Gab2	Jph3																Pfdn6																										Rcl1
			Usp35	Gm22																1110038B12Rik																										Gldc
			Kctd21	Rnf166																Lsm2																										Stambpl1
			Rsf1	Cbfa2t3																Lst1																										Exoc6
			Pak1	Cdh15																Ppp1r18																										Hps6
			Capn5	Ankrd11																Ppp1r11																										Arl3
			Uvrag	Chmp1a																Znrd1as																										Nt5c2
			Arrb1	Def8																Gm7335																										Pdcd4
			Neu3	Dbndd1																Slc29a1																										Nhlrc2
			Pgm2l1	Rhou																Gm20517																										Was
			C2cd3	Trim67																Frs3																										Ftsj1
			Rab6a	2810004N23Rik																Mrps36-ps1																										2017-09-06
			Fchsd2	Egln1																Shd																										Stag2
			Inppl1	Rbm34																Mpnd																										Dcaf12l2
			Numa1	Alkbh8																Efna5																										1110012L19Rik
			Nup98	Gm7390																Akain1																										Mtm1
			Syt9	Yap1																Cebpzos																										Pnma3
			Nrip3	Cep126																Gemin6																										Xlr3b
			Parva	Pgr																Morn2																										Pnck
			Tead1	Cep57																1110020A21Rik																										Las1l
			Arntl	Zfp26																Cript																										Vcp-rs
			Far1	Cdkn2d																2700099C18Rik																										Magee2
			Rps15a	Elavl3																Gm1976																										Nap1l3
			Smg1	Prdm10																Rpl27-ps3																										Gprasp2
			Syt17	Fli1																Dsg2																										Zcchc18
			Ccp110	Pknox2																Nrep																										Psmd10
			Gm5601	1700063D05Rik																Srp19																										Tro
			Cdr2	Tbcel																Snhg4																										Rragb
			Gga2	Arhgef12																Pura																										Spin2c
			Sbk1	RP23-162P10.8																Cystm1																										Cnksr2
			Mapk3	Hinfp																Slc35a4																										Phka2
			Taok2	Gm9830																Ndufa2																										Ctps2
			Tbc1d10b	Bcl9l																1700086O06Rik																										Car5b
			Zfp689	Ddx6																2900055J20Rik																										Tceanc
			Rnf40	Gm16536																Rps2-ps10
			Zfp646	RP23-103O7.2																1500015A07Rik
			Bag3	Pts																Adrb2
			Plpp4	Dixdc1																Poli
			Ate1	Zc3h12c																BC031181
			Dhx32	Ube2q2																Cyb5a
			Stk32c	Hmg20a																Tmem134
			Inpp5a	Rpp25																Slc29a2
			Zfp941	Ulk3																Cst6
			Pnpla2	Clk3																Banf1
			Tollip	Celf6																Eif1ad
			Brsk2	Gramd2																Rnaseh2c
			Dusp8	Megf11																Slc25a45
			Shank2	Pdcd7																Gm14964
			Ppfia1	Rasl12																Trmt112
			Oraov1	Snx22																Ppp1r14b
			Map2k7	Tpm1																Vegfb
			Snapc2	Rora																Trpt1
			Elavl1	Ice2																Snhg1
			Irs2	Fam81a																Nxf1
			Arhgef7	Polr2m																Uqcc3
			Mcf2l	Pygo1																Tmem258
			Pcid2	Tmod2																Plpp6
			Champ1	Lrrc1																Gm10136
			Dlgap2	Fbxo9																Rpl9-ps6
			Arhgef10	Ick																Htr7
			Kbtbd11	Sh3bgrl2																Opalin
			Mcph1	4933431K14Rik																Kazald1
			Gm26853	Ube2cbp																Gm28578
			Nek3	Snap91																Gm6807
			Ikbkb	Syncrip																Mfsd13a
			Kat6a	Ankrd34c																Borcs7
			Plekha2	Zic1																B230217O12Rik
			Star	Slc25a36																Fam204a
			Adgra2	Msl2																2010204K13Rik
			Rab11fip1	Cdv3																Praf2
			Tti2	Rbm15b																Xk
			Mak16	Cish																Ndp
			Eri1	Mon1a																Araf
			Mfhas1	Amigo3																Cfp
			Vps37a	Ccdc71																Uxt
			Rwdd4a	Prkar2a																Gm4853
			Wwc2	Gm42641																Gm14586
			Galnt7	Map4																Vma21
			Nek1	Kif9																Cmc4
			Palld	Als2cl																Dmrtc1a
			Lzts1	Arpp21																5530601H04Rik
			Gm10033	Ubp1																Pcdh11x
			Upf1	Rbms3																Timm8a1
			Pik3r2	Gm17396																Rpl36a
			Mast3	Golga4																Tceal1
			Zfp709	Ctdspl																Plp1
			Ccnb2-ps	Oxsr1																Slc25a53
			Rab8a	E530011L22Rik																2210013O21Rik
			Cherp	Zfp651																Tmsb4x
			Med26	Limd1																Hccs
			Nwd1	Gm10052																Erdr1
			Rasd2	Akap12																mt-Nd1
			Gab1	Ipcef1																mt-Nd2
			Dnajb1	Cnksr3																mt-Co2
			Prkaca	Tab2																mt-Atp8
			Nacc1	Samd5																mt-Atp6
			Tnpo2	Plagl1																mt-Co3
			Gpt2	Cited2																mt-Nd3
			Zfp423	Heca																mt-Nd4l
			Papd5	Map7																mt-Nd4
			Cyld	Tbpl1																mt-Nd6
			Tox3	Stx7																mt-Cytb
			Rbl2	Epb41l2
			Rpgrip1l	L3mbtl3
			Gnao1	RP23-128C4.4
			Ogfod1	Tspyl1
			Ciapin1	Marcks
			Dok4	Cdk19
			Ccdc102a	Foxo3
			Ndrg4	Scml4
			Gm7192	Sobp
			Dync1li2	Fabp7
			Elmo3	Lims1
			Fhod1	Rpl27a-ps1
			Ranbp10	Lrrc20
			Chtf8	Slc25a16
			Utp4	Pbld2
			Ap1g1	Zfp365
			Mtss1l	Ccdc6
			Pdpr	Lrrc75b
			Rfwd3	Zfp280b
			Adat1	Pcbp3
			Terf2ip	Adarb1
			Mon1b	Fam207a
			Vat1l	C2cd4c
			Cdyl2	Palm
			Cenpn	Arid3a
			1700030J22Rik	Sbno2
			Taf1c	Atp5d
			Cotl1	Klf16
			Usp10	Abhd17a
			Irf8	Csnk1g2
			Vps9d1	Gm26541
			Ccsap	Dot1l
			Exoc8	Lmnb2
			Pard3	Diras1
			Msantd4	Sgta
			Gm16485	Apba3
			Maml2	Cactin
			Sesn3	Nfic
			Chordc1	Celf5
			Zfp317	Tmem263
			Zfp426	Tmpo
			Zfp266	Tmcc3
			Pde4a	Nudt4
			Anln	Poc1b
			Vps26b	Gm15663
			Adamts15	Lin7a
			Zbtb44	Nav3
			Arhgap32	Phlda1
			AW551984	Krr1
			Gramd1b	Atxn7l3b
			Ubash3b	Thap2
			Kmt2a	Rab3ip
			RP23-3F1.8	Frs2
			Rnf214	Mdm2
			Pafah1b2	Dyrk2
			Zbtb16	Grip1
			Dlat	Msrb3
			Cryab	BC048403
			Fdxacb1	Ctdsp2
			Arhgap20	Cdk4
			Npat	Dtx3
			Dnaja4	R3hdm2
			Crabp1	Zbtb39
			Snx33	Baz2a
			Ptpn9	Rbms2
			Pml	Smarcc2
			Arih1	Eif4enif1
			Senp8	Tug1
			Larp6	Dusp18
			Fem1b	Ccdc157
			Pias1	Nf2
			Aagab	Nefh
			Smad3	Polm
			Dis3l	Purb
			Dpp8	Ikzf1
			Plekho2	Grb10
			Trip4	Plek
			Usp3	Spred2
			Tln2	Sertad2
			Bnip2	Aftph
			Rnf111	Peli1
			Zfp280d	Otx1
			Unc13c	Gm12059
			Mapk6	Rel
			Filip1	Ccdc85a
			Htr1b	Cpeb4
			Ibtk	Fam196b
			Tbx18	Pank3
			AF529169	Ebf1
			Rasa2	Clint1
			Zbtb38	Gm12184
			Spsb4	Zfp62
			Pik3cb	Cnot6
			Mras	Maml1
			Dzip1l	Hnrnpab
			Amotl2	Gm45818
			Rab6b	Shroom1
			Mrpl3	A430108G06Rik
			Acy1	Tnip1
			Rad54l2	Larp1
			Ip6k1	Rnf187
			Nicn1	Jmjd4
			1700102P08Rik	Med9
			Usp19	Gid4
			Qrich1	Natd1
			Pfkfb4	Lrrc75a
			Smarcc1	Cox10
			Ptpn23	Gas7
			Lrrc2	Vamp2
			Epm2aip1	Zbtb4
			Dclk3	Plscr3
			RP24-300B21.2	Kctd11
			Pdcd6ip	Eif5a
			Gpd1l	Ybx2
			Myd88	Phf23
			Myrip	Dlg4
			Trak1	Zfp3
			Nktr	Rabep1
			Abhd5	Ccdc92b
			Tcaim	Mnt
			Zfp445	Hic1
			Zkscan7	Crk
			Lztfl1	Rph3al
			Fyco1	Gosr1
			2010315B03Rik	Taok1
			Plekhg1	Phf12
			Esr1	Fam222b
			Syne1	Nlk
			Rgs17	Lgals9
			Sash1	Ksr1
			Rab32	Rab11fip4
			Shprh	Rhbdl3
			Phactr2	5730455P16Rik
			Arfgef3	Zfp207
			Pde7b	Cdk5r1
			Ahi1	Rffl
			Enpp1	Dhrs11
			Gm10145	Med13
			9330159F19Rik	Ypel2
			Ncoa7	Srsf1
			Hey2	Vezf1
			Tspyl4	Cuedc1
			Amd2	Msi2
			Amd1	Hlf
			Wasf1	Samd14
			Armc2	Zfp652
			Lace1	Snx11
			Nr2e1	Sp2
			RP23-285L15.1	Socs7
			Cep85l	Epop
			RP24-496C8.8	Cwc25
			Tbc1d32	Lasp1
			Gcc2	Casc3
			Sh3rf3	Wipf2
			2017-09-10	Rara
			Sowahc	Smarce1
			Ddx21	Aoc2
			Stox1	Etv4
			Ctnna3	Lsm12
			Ado	Atxn7l3
			Arid5b	Gpatch8
			Fam13c	Hexim2
			Ipmk	Arhgap27
			RP24-498F21.2	Gosr2
			Bcr	Mapt
			Adora2a	Kcnh6
			Dip2a	Smurf2
			Ybey	Sox9
			Trappc10	2610035D17Rik
			Pdxk	Rab37
			Btbd2	Slc9a3r1
			Gng7	Ush1g
			Zbtb7a	Kctd2
			Zfr2	Armc7
			Pip5k1c	Slc25a19
			Zfp781	Grb2
			Txnrd1	Unc13d
			Rfx4	Wbp2
			Ric8b	Fbf1
			Cry1	Cygb
			Btbd11	Srsf2
			Uhrf1bp1l	Tnrc6c
			Anks1b	Cyth1
			Cdk17	Rbfox3
			Fgd6	Cbx2
			Ube2n	Gm44935
			Eea1	Ccdc137
			Kitl	Arhgdia
			Ppp1r12a	Mafg
			Osbpl8	Hmga1-rs1
			Rab21	Asxl2
			Cpsf6	Dnmt3a
			RP23-468J15.3	Dnajc27
			Tbc1d30	Ubxn2a
			Srgap1	Hs1bp3
			Ppm1h	Pum2
			Agap2	Fam84a
			Kif5a	E2f6
			Stat6	2410004P03Rik
			Stat2	Gm6969
			Ankrd52	Klf11
			Rab5b	Rnf144a
			Rnf185	Sox11
			Sf3a1	Prkar2b
			Mtmr3	Gm18025
			Ascc2	Ahr
			Xbp1	Foxg1
			Dbnl	Nkx2-1
			Tns3	Klhdc1
			Cobl	Arf6
			Ppp3r1	1700086L19Rik
			Wdr92	Akap5
			Etaa1	Rab15
			Meis1	Max
			Cep68	Dcaf5
			Ehbp1	Plekhd1
			0610010F05Rik	Ccdc177
			Ccdc88a	Synj2bp
			Sh3pxd2b	Ttc9
			Ubtd2	Map3k9
			Stk10	Numb
			Fbxw11	Elmsan1
			Wwc1	4732487G21Rik
			Lsm11	Esrrb
			Fndc9	Irf2bpl
			Sqstm1	Cipc
			Zfp354c	Tmed8
			Sec24a	Cep128
			Jade2	Gtf2a1
			Ppp2ca	Gm28933
			Tcf7	Calm1
			Hspa4	Atxn3
			Aff4	Golga5
			Sowaha	Tunar
			Il4	D430019H16Rik
			G3bp1	Ccnk
			Irgm2	Eml1
			2810021J22Rik	Evl
			Iba57	Wdr25
			Zkscan17	Begain
			Tom1l2	Rcor1
			Alkbh5	Eif5
			Gm12623	Bag5
			Llgl1	Akt1
			Smcr8	Crip2
			Epn2	Sp4
			Ulk2	Larp4b
			Specc1	Zmynd11
			Arhgap44	Gng4
			Pik3r5	Gli3
			Ccdc42	Mplkip
			Ndel1	Zscan26
			Pfas	Zfp184
			Chd3	BC005537
			Cyb5d1	E2f3
			Senp3	Foxf2
			Polr2a	Cage1
			Pelp1	A730081D07Rik
			Dhx33	Smim13
			Mis12	Tmem170b
			Atp2a3	Jarid2
			Rap1gap2	Mylip
			Cluh	Atxn1
			Pafah1b1	Rbm24
			Mettl16	Tpmt
			Tsr1	Dek
			Snord91a	Rnf144b
			Dph1	Fgd3
			Pitpna	Cplx2
			Doc2b	Simc1
			Ankrd13b	4833439L19Rik
			Flot2	Gprin1
			Sarm1	Sncb
			Tnfaip1	Zfp346
			Nf1	Nsd1
			Myo1d	Ddx46
			Ap2b1	B230219D22Rik
			Rasl10b	Ubqln1
			Mrm1	6720489N17Rik
			Usp32	Habp4
			Appbp2	Zfp65
			Ppm1d	Zfp85os
			Trim37	Papd7
			Ppm1e	Tppp
			Mtmr4	Fam172a
			Coil	4833422C13Rik
			Trim25	Ankrd34b
			Pctp	Mtx3
			Stxbp4	Aggf1
			Spag9	Poc5
			Lrrc59	Ankdd1b
			Ppp1r9b	Pik3r1
			Kat7	Srek1
			Ngfr	Trappc13
			Ube2z	Mier3
			Mrpl10	Arl15
			Tbkbp1	Isl1
			Kpnb1	Pxk
			Srcin1	4930452B06Rik
			Mllt6	Gm9800
			Pip4k2b	Fezf2
			Med1	Atxn7
			Cdk12	Thrb
			Ppp1r1b	Gng2
			Erbb2	Ap3m1
			Grb7	Kat6b
			Rapgefl1	Zfp503
			Acly	Ppif
			Nkiras2	Zcchc24
			Kat2a	Slmap
			Rab5c	Sh3bp5
			Stat5b	Eaf1
			Stat5a	Ldb3
			Stat3	Gmfb
			Psme3	Mapk1ip1l
			Rundc1	Peli2
			Vat1	Gm26782
			Dusp3	Zfp219
			Mpp2	Tox4
			BC030867	Gm43305
			Ubtf	4931414P19Rik
			Rundc3a	Acin1
			Fmnl1	Ppp1r3e
			Cdc27	Efs
			Tlk2	Myh6
			Map3k3	Thtpa
			Pitpnc1	Ap1g2
			Axin2	Jph4
			Abca9	Parp4
			Cdr2l	Amer2
			Gga3	Bnip3l
			Evpl	Nkx3-1
			Foxj1	Fndc3a
			Ube2o	Cbx3-ps6
			Usp36	Zc3h13
			Tbc1d16	Cog3
			Baiap2	Gpalpp1
			Bahcc1	Tsc22d1
			Actg1	Epsti1
			Pycr1	Wbp4
			Fasn	Dis3
			Fn3krp	Kctd12
			Rab10	Slain1
			Kif3c	Rbm26
			Ncoa1	Gm17066
			Itsn2	Spry2
			Wdcp	Sox21
			Klhl29	Mbnl2
			Rhob	Rap2a
			RP23-36H21.3	Itgbl1
			Fam49a	Fgf14
			Trib2	Rai14
			Lpin1	Mtmr12
			Rock2	Golph3
			Atp6v1c2	Basp1
			Hpcal1	Otulin
			Asap2	Ankrd33b
			Adi1	Tspyl5
			Myt1l	Rims2
			Cbll1	Trps1
			Cog5	Samd12
			Hbp1	Deptor
			Hdac9	Zhx1
			Dgkb	Mtss1
			Stxbp6	Fam84b
			G2e3	Myc
			Arhgap5	Ly6e
			Npas3	Zfp623
			Egln3	Fam83h
			Brms1l	K230010J24Rik
			Fam179b	Scrib
			Sos2	Hsf1
			Map4k5	H1f0
			Trim9	Sox10
			Daam1	Cbx7
			Ppm1a	Tnrc6b
			Zbtb1	Tef
			Mpp5	Tob2
			Plekhh1	Csdc2
			Arg2	2017-09-03
			Gm3693	Rrp7a
			Rgs6	Cyb5r3
			Acot6	Parvb
			Dnal1	Phf21b
			Fam161b	Nup50
			Syndig1l	5031439G07Rik
			Dlst	Cerk
			Mlh3	Pphln1
			Nek9	Arid2
			Gpatch2l	Hdac7
			Rps6ka5	Ccdc184
			Ccdc88c	Cacnb3
			Trip11	Fam186b
			Itpk1	Prpf40b
			Ubr7	Dazap2
			Otub2	Krt1
			Atg2b	Eif4b
			Gskip	Sp1
			Papola	Atf7
			Ccdc85c	Cbx5
			Ppp2r5c	Zfp385a
			Traf3	Zfp597
			Mark3	Naa60
			Kif26a	Gm15879
			Inf2	Hmox2
			Pacs2	Cdip1
			Fam208b	Ubald1
			Pitrm1	Carhsp1
			Wdr37	1810013L24Rik
			Dip2c	Litaf
			Actn2	Marf1
			Lgals8	Med15
			Lyst	Map6d1
			Hecw1	Lpp
			Gm26645	Ccdc50
			Cdk13	Fgf12
			Zscan12	Hrasls
			Zkscan8	Fam43a
			Hist1h2bl	Acap2
			Hist1h2bn	Pcyt1a
			Hist1h2be	Zfp148
			Fam65b	Lrrc58
			Aldh5a1	Gsk3b
			Mrs2	Gap43
			Foxc1	Usf3
			Nqo2	Pcnp
			Prpf4b	Cggbp1
			Cdyl	Bach1
			Riok1	Scaf4
			Nedd9	Olig2
			Gfod1	Itsn1
			Cap2	Dyrk1a
			Nhlrc1	Prdm15
			Kdm1b	Pisd-ps2
			Zfp169	E430024P14Rik
			Ptpdc1	Fgfr1op
			Phf2	Prr18
			Fam120a	Qk
			Wnk2	Phf10
			Bicd2	A930024N18Rik
			Tes3-ps	Tbp
			Spin1	Zfp946
			Shc3	Srrm2
			Diras2	Amdhd2
			Nfil3	Rnps1
			Rnf44	E4f1
			Tifab	Traf7
			Smad5	Slc9a3r2
			Gm45623	Zfp598
			Dapk1	Eme2
			Cdc14b	Ube2i
			Rybp-ps	Sox8
			Zfp712	Capn15
			Zfp458	Rab11fip3
			Zfp729b	Bak1
			Zfp729a	Hmga1
			Gm9625	Nudt3
			Ube2ql1	D17Wsu92e
			Exoc3	Zfp523
			Cast	Ppard
			Rhobtb3	Fkbp5
			Gm8399	4930539E08Rik
			Gm8546	Tbc1d22b
			Rasgrf2	Gm28043
			Papd4	Zfand3
			Homer1	Wdr4
			Pde8b	Pknox1
			Col4a3bp	Rrp1b
			Enc1	Zfp870
			Fcho2	Zfp81
			Tnpo1	Daxx
			Map1b	Brd2
			Bdp1	Nelfe
			Mast4	Mdc1
			Erbin	Atat1
			Sgtb	Ppp1r10
			Zswim6	Prr3
			Rab3c	Trim39
			Map3k1	Slc25a27
			Snx18	Runx2
			Cadps	Tcte1
			Oxsm	Gltscr1l
			Rarb	Gm5814
			Nr1d2	Foxp4
			Ube2e1	Nfya
			Sec24c	Ccdc94
			Dennd6a	Ticam1
			Fam208a	Safb
			Erc2	Ranbp3
			Chdh	Mllt1
			Dcp1a	Khsrp
			Prkcd	Vapa
			Sfmbt1	Ralbp1
			Nek4	Epb41l3
			Bap1	Zbtb14
			Dnah1	Lbh
			Ncoa4	Gpatch11
			Parg	Cdc42ep3
			Chat	Sos1
			Ercc6	Zfp36l2
			Wdfy4	Ppm1b
			Sncg	Six3
			Wapl	Prkce
			Ccser2	Socs5
			Ghitm	Foxn2
			Ddhd1	Epc1
			Samd4	Mkx
			Atg14	Mib1
			Naa30	Gm6457
			Sall2	Taf4b
			Abhd4	Klhl14
			Rem2	Nol4
			Homez	Zfp35
			Zfhx2	Zfp24
			Khnyn	Celf4
			Zmym2	Lims2
			Rcbtb1	Pkd2l2
			Nupl1	Fam53c
			Mtmr6	Ctnna1
			Spata13	Cxxc5
			Zfp395	Psd2
			Trim35	Igip
			Dpysl2	Dnd1
			Pnma2	Zmat2
			Dock5	Rell2
			Slc25a37	Arhgap26
			Chmp7	Rbm27
			Rhobtb2	Tcerg1
			Egr3	Dcp2
			Polr3d	Mcc
			Phyhip	Eif1a
			Dmtn	Atg12
			Xpo7	Lmnb1
			Rb1	Prrc1
			Enox1	Tcof1
			Kbtbd6	Pmaip1
			Elf1	Chmp1b
			Pcdh17	Fam210a
			Gm10110	Rab27b
			Dach1	Mex3c
			Tbc1d4	Mbd1
			Fbxl3	Smad7
			Rnf219	Zfp236
			Tpm3-rs7	Neto1
			Farp1	Socs6
			Stk24	9330132A10Rik
			AW549877	Cdk2ap2
			Ttc33	Sf3b2
			Rictor	AI837181
			Npr3	Snx15
			Zfr	Sf1
			Trio	Naa40
			Dnah5	Hnrnpul2
			Ctnnd2	Ubxn1
			Pop1	Eml3
			Kcns2	Vps37c
			Rnf19a	Ccdc86
			Ankrd46	Dtx4
			Ywhaz	Zfp91
			Ncald	Prune2
			Ubr5	Trpm6
			Baalc	Rorb
			Oxr1	Zfand5
			Zhx2	Klf9
			Fbxo32	Apba1
			Fam91a1	Rfx3
			Asap1	Pten
			Sla	Lipo3
			Khdrbs3	Tbc1d12
			Fam135b	Frat1
			Ago2	Sfxn3
			Jrk	Poll
			Zc3h3	Nolc1
			Scrt1	Trim8
			Rbfox2	Sfr1
			Kctd17	Shoc2
			Cdc42ep1	Vti1a
			Csnk1e	Ccdc186
			Ddx17	Ablim1
			Gtpbp1	Shtn1
			Mief1	Rab11fip2
			St13	Cacul1
			Xpnpep3	Nanos1
			Ep300	Grk5
			Rangap1	Nudt11
			Zc3h7b	Shroom4
			Desi1	Usp27x
			Tcf20	Gripap1
			Poldip3	Otud5
			Pacsin2	Suv39h1
			Ldoc1l	B630019K06Rik
			Prr5	Dynlt3
			Fam118a	Mid1ip1
			Tbc1d22a	Rbm10
			Selenoo	Cdk16
			Mapk11	Gm5124
			Kif21a	C330007P06Rik
			Abcd2	Nkap
			Lrrk2	Rap2c
			Pdzrn4	Phf6
			Rpap3	Fam122b
			Senp1	Cxx1a
			Ccnt1	Cxx1b
			Adcy6	Fhl1
			Arf3	Rbmx
			Ddn	Zic3
			Kmt2d	Fgf13
			Gpd1	Gm715
			Larp4	Sox3
			Dip2b	Gm14698
			Csrnp2	Zfp275
			Tfcp2	Mecp2
			Rarg	Ubl4a
			Calcoco1	Prkx
			Smug1	Pcyt1b
			Pde1b	Zfx
			Zfp174	Gm26617
			Dnase1	Zc3h12b
			Crebbp	Ar
			Glis2	Tmem28
			Mgrn1	Snx12
			Glyr1	Cited1
			Ubn1	Chic1
			Abat	Taf9b
			Zc3h7a	2610002M06Rik
			Gspt1	Sh3bgrl
			Ercc4	Hdx
			Mkl2	Cstf2
			Fgd4	Bex1
			Ppm1f	Bex3
			Mapk1	Ammecr1
			Snap29	Dcx
			Crkl	Ubqln2
			Slc25a1	Rps6ka3
			Trmt2a	Map7d2
			Dgcr8	Sh3kbp1
			Gnb1l	Nhs
			Gp1bb	Reps2
			2017-09-05	Syap1
			Klhl24	Mospd2
			Dvl3
			2510009E07Rik
			Map3k13
			Senp2
			Etv5
			Ppp1r2
			Dlg1
			Ncbp2
			Senp5
			Pak2
			Ubxn7
			Tnk2
			Rubcn
			Fyttd1
			Lrch3
			Arhgap31
			Qtrtd1
			Naa50
			Gtpbp8
			Plcxd2
			Bbx
			Cblb
			Nfkbiz
			Tomm70a
			Crybg3
			Arl13b
			Zfp654
			Nrip1
			Gabpa
			Tiam1
			Rcan1
			Hlcs
			Psmg1
			Tiam2
			Arid1b
			Snx9
			Synj2
			Tulp4
			Rps6ka2
			Pde10a
			Sod2
			Chd1
			Zfp51
			Zfp229
			Pdpk1
			Tbc1d24
			Ccnf
			Mlst8
			Caskin1
			Nthl1
			Unkl
			Baiap3
			Rpusd1
			Rhot2
			Rab40c
			Phf1
			Syngap1
			Pacsin1
			Mapk14
			Kctd20
			Srsf3
			Cdkn1a
			Mtch1
			Pim1
			Wiz
			Zfp871
			Zfp799
			Zfp952
			Ring1
			Rxrb
			Prrt1
			Ehmt2
			Bag6
			Abcf1
			Gnl1
			Gm26917
			Cenpq
			Rcan2
			B230354K17Rik
			Tjap1
			Ttbk1
			Srf
			Klc4
			Ppp2r5d
			Trerf1
			Kat2b
			Slc5a7
			Pot1b
			Chaf1a
			Plin4
			Dpp9
			Nudt12
			Ppp4r1
			Mtcl1
			Lpin2
			Smchd1
			Fam179a
			Ehd3
			Fam98a
			Strn
			Gm6548
			Hnrnpll
			Srsf7
			Thumpd2
			Eml4
			Plekhh2
			Ttc7
			Fbxo11
			Ppp1r21
			9430020K01Rik
			Zeb1
			Kif5b
			Mpp7
			Impact
			Zfp521
			Ss18
			Garem1
			Mapre2
			Zfp397
			Rprd1a
			Sap130
			Ammecr1l
			Camk4
			Stard4
			Fam13b
			Brd8
			Kdm3b
			Egr1
			Arap3
			Rnf14
			Spry4
			Fgf1
			Nr3c1
			Kctd16
			Sh3rf2
			Stk32a
			Dpysl3
			Eif3j2
			Ythdc2
			Pggt1b
			Fem1c
			Tnfaip8
			Sncaip
			Csnk1g3
			Isoc1
			Synpo
			Ndst1
			Afap1l1
			Napg
			Wdr7
			Nedd4l
			Spire1
			Smad4
			Elac1
			Mapk4
			Lipg
			Ctif
			8030462N17Rik
			Setbp1
			Pard6g
			Nfatc1
			Mbp
			Zfp516
			Zadh2
			Kmt5b
			Chka
			Carns1
			Kdm2a
			Rbm14
			Bbs1
			Peli3
			Rin1
			Klc2
			Sipa1
			Map3k11
			Frmd8
			Tigd3
			Dpf2
			Cdc42ep2
			Ppp2r5b
			Rasgrp2
			Stip1
			Mark2
			2700081O15Rik
			Wdr74
			Mta2
			Ahnak
			Lrrc10b
			Cpsf7
			Stx3
			Tle4
			Gnaq
			Carnmt1
			Gda
			Trpm3
			Fam122a
			Kank1
			Glis3
			Gm5822
			Cdc37l1
			Ak3
			Jak2
			Ric1
			Cstf2t
			Pank1
			Tnks2
			Cpeb3
			Sorbs1
			Aldh18a1
			Rrp12
			Pi4k2a
			Hif1an
			Fam178a
			Twnk
			Mgea5
			Kcnip2
			Nfkb2
			Actr1a
			Sufu
			Ina
			Neurl1a
			Sh3pxd2a
			Slk
			Xpnpep1
			Add3
			Gpam
			Tcf7l2
			Afap1l2
			Hspa12a
			Gpkow
			Pim2
			Wdr13
			Med14
			Fundc1
			Rp2
			Syn1
			Klhl13
			Zcchc12
			Lonrf3
			Zbtb33
			Sash3
			Bcorl1
			Zfp280c
			Enox2
			Stk26
			Zfp449
			Arhgef6
			Fmr1
			Mamld1
			Mtmr1
			Zfp185
			Zfp92
			Hcfc1
			Irak1
			Ikbkg
			Tbl1x
			Dmd
			Tab3
			Pola1
			Eif2s3x
			Zxdb
			Arhgef9
			Zc4h2
			Ophn1
			Stard8
			Dlg3
			Zmym3
			Nhsl2
			Rgag4
			Pabpc1l2b-ps
			Gm6206
			Nap1l2
			Rlim
			Abcb7
			Atrx
			Pou3f4
			Chm
			Diaph2
			Trmt2b
			Armcx3
			Armcx2
			Morf4l2
			Rab9b
			Fam199x
			Mid2
			Pak3
			Fgd1
			Wnk3
			Phf8
			Shroom2
			Klhl34
			A830080D01Rik
			Txlng
			Frmpd4
			Uty
[truncated: 14 more columns]

## Sheet: All DEG overlap
InputCategories	UserDefinedCategories	Type	CorrectedPvalues	NumGenes	CategoryGenes
turquoise	DGE__DGE	User	2.77e-102	279	3300002P13Rik, AI506816, Abcb1a, Abcc8, Abhd16a, Acsl3, Adam15, Adam23, Adcy2, Adgrb1, Adgrb3, Adgrl3, Adra1b, Alg2, Alg5, Aplp2, Apmap, Asah1, Atad1, Atp1a1, Atp2b1, Atp2c1, Atp2c2, Atp6ap1, Atp6ap2, Atp6v0a1, Atraid, B3galt2, B4galnt4, B4gat1, Brinp1, Bscl2, C1galt1c1, C1ql2, C1qtnf4, C1ra, Cacna1a, Cacng8, Casd1, Ccdc47, Cd34, Cdh10, Cdh11, Cdh2, Cdh8, Cdh9, Celsr2, Chid1, Chst12, Clcc1, Cln6,…
blue	DGE__DGE	User	1.3e-10	122	2900097C17Rik, 8030462N17Rik, Adora2a, Ankrd52, Ankrd6, Ankrd63, Arhgap31, Asap2, Baiap3, Bbx, Bcl2, Ccdc42, Ccdc85c, Cdc73, Cdkn1a, Chat, Chordc1, Clock, Clvs1, Cpeb3, Crkl, Cyb5d1, Cyp26b1, Dach1, Ddx17, Dgkb, Doc2b, Eea1, Egr1, Egr3, Esr1, Fam126b, Fam13b, Fgf1, Filip1, Fndc3b, Foxo1, Fsd1l, Gad2, Gm12696, Gm26645, Gm7292, Gng7, Gpam, Hist1h2be, Homer1, Hpcal1, Htr1d, Irs2, Kctd10, Kdm7a, Klhl…

## Sheet: UP DEG overlap
InputCategories	UserDefinedCategories	Type	CorrectedPvalues	NumGenes	CategoryGenes
magenta	DGEup__DGEup	User	0.0033	22	1500015O10Rik, Abhd3, Bcan, Cpq, Cyp4v3, Enpp2, Erap1, F3, Gpc5, Gria2, Itih3, Matn4, Mfge8, Nucb1, Pla2g7, Pon2, Ptger3, Serpine2, Slc39a12, Sod3, Ttr, Vcam1
turquoise	DGEup__DGEup	User	2.16e-195	279	3300002P13Rik, AI506816, Abcb1a, Abcc8, Abhd16a, Acsl3, Adam15, Adam23, Adcy2, Adgrb1, Adgrb3, Adgrl3, Adra1b, Alg2, Alg5, Aplp2, Apmap, Asah1, Atad1, Atp1a1, Atp2b1, Atp2c1, Atp2c2, Atp6ap1, Atp6ap2, Atp6v0a1, Atraid, B3galt2, B4galnt4, B4gat1, Brinp1, Bscl2, C1galt1c1, C1ql2, C1qtnf4, C1ra, Cacna1a, Cacng8, Casd1, Ccdc47, Cd34, Cdh10, Cdh11, Cdh2, Cdh8, Cdh9, Celsr2, Chid1, Chst12, Clcc1, Cln6,…

## Sheet: DOWN DEG overlap
InputCategories	UserDefinedCategories	Type	CorrectedPvalues	NumGenes	CategoryGenes
blue	DGEdown__DGE	User	2.57e-54	122	2900097C17Rik, 8030462N17Rik, Adora2a, Ankrd52, Ankrd6, Ankrd63, Arhgap31, Asap2, Baiap3, Bbx, Bcl2, Ccdc42, Ccdc85c, Cdc73, Cdkn1a, Chat, Chordc1, Clock, Clvs1, Cpeb3, Crkl, Cyb5d1, Cyp26b1, Dach1, Ddx17, Dgkb, Doc2b, Eea1, Egr1, Egr3, Esr1, Fam126b, Fam13b, Fgf1, Filip1, Fndc3b, Foxo1, Fsd1l, Gad2, Gm12696, Gm26645, Gm7292, Gng7, Gpam, Hist1h2be, Homer1, Hpcal1, Htr1d, Irs2, Kctd10, Kdm7a, Klhl…
brown	DGEdown__DGE	User	3.13e-09	55	9330132A10Rik, A830010M20Rik, Agfg1, Akap5, Atxn1, C530008M17Rik, Ccdc186, Cd4, Cggbp1, Cpeb2, Cstf2, Fam102b, Fam117b, Fam196b, Fndc3a, Fosb, Fosl2, Gm45133, Isl1, Kazn, Kctd12, Klf3, Map2, Mbnl1, Mbnl2, Mcc, Msi2, Mtss1, Nebl, Nhs, Nkx2-1, Pcp4l1, Plagl1, Pphln1, Prkar2b, Ptpn4, Qk, Rab37, Rbms3, Rc3h2, Reps2, Six3, Slmap, Sp1, Synpo2, Tox4, Tspyl5, Wasl, Wipf1, Ypel2, Zcchc24, Zdbf2, Zfp36l2, …
orange	DGEdown__DGE	User	0.0168	9	Etv6, Fam107a, Gm45529, Gprin3, Hist1h1c, Hist2h3c2, Midn, Smyd1, Trh

## Sheet: Brain Lists
InputCategories	UserDefinedCategories	Type	CorrectedPvalues	NumGenes	CategoryGenes
black	salmon_M12_Ribosome__HumanMeta	Brain	0.0109	14	BTF3, RPL17, RPL24, RPL35A, RPL39, RPLP2, RPS11, RPS12, RPS14, RPS19, RPS20, RPS23, RPS24, SNRPG
black	salmon_M12_Ribosome__MouseMeta	Brain	0.0261	16	ACYP2, BTF3, COMMD6, COX6C, COX7B, FAM96A, HINT1, IMMP1L, RPL24, RPS11, RPS19, SNHG6, SRA1, TBCA, TMEM167, TOMM7
blue	PostSynapticDensity_proteins__Bayes	Brain	5.69e-08	239	AAK1, ACLY, ACTN2, ACTR1A, ACTR1B, ADD3, AGAP1, AGAP2, AGL, AHCYL1, AHNAK, AK3, ALDH5A1, ANKS1B, AP1G1, AP2B1, ARF3, ARHGAP1, ARHGEF7, ARRB1, BAG3, BAIAP2, BCR, BRSK1, CADPS, CALCOCO1, CAP1, CAP2, CAPN5, CAPZA1, CASKIN1, CCDC93, CLIP2, CLIP3, CLTA, CORO2A, CRAT, CRKL, CRYAB, CSNK1E, CSRP1, CTNND1, CTNND2, CYLD, DAAM1, DAB2IP, DBNL, DCLK1, DDAH1, DDX17, DGKB, DIP2B, DIRAS2, DLAT, DLG1, DLG2, DLG3,…
blue	Neuron_probable__Cahoy	Brain	0.00136	246	9330159F19RIK, AAK1, ACTN2, ADAR, AFF3, AHI1, AI504432, AKT3, ANKRD50, AP1G1, AP2B1, ARF3, ARG2, ARHGAP20, ARHGDIB, ARHGEF7, ARMCX2, ARMCX3, ATE1, AW551984, BAIAP2, BAIAP3, BBS1, BRD8, BRSK2, BTBD11, CADPS, CAMK1D, CAMK1G, CAMK4, CAMTA1, CCNT2, CDKN1A, CHD3, CHM, CHORDC1, CIAPIN1, COBL, COIL, CPEB3, CRABP1, CSNK1E, CYP26B1, DAPK1, DDN, DFNA5, DGCR8, DGKD, DGKZ, DIRAS2, DLAT, DLG2, DLG3, DLGAP4, D…
blue	blue_M16_Neuron__CTX	Brain	0.00188	131	AAK1, ABAT, ACACB, ACLY, ANKRD26, AP2B1, API5, ARHGEF9, ARIH1, ARMCX3, ARNTL, BCAT1, BCL2L1, BICD2, CAB39, CDC27, CEP68, COG5, CPSF6, CRKL, CSNK1G3, CYLD, DCUN1D4, DFFA, DGKI, DIP2C, DLAT, DLG1, DLG2, DLG3, DMD, DNAJB4, DPYSL3, DUSP3, ELAVL2, FAM49A, FBXW11, FEM1B, FLOT2, G3BP2, GAPVD1, GDAP1, GHITM, GMEB2, GNB1, GOLGA1, GON4L, GRSF1, HECW1, HSPA4, HSPH1, ITSN2, KBTBD11, KCNAB1, LGALS8, MAP1B, MA…
blue	yellow_Caudate__HumanChimp	Brain	0.0164	37	ACTN2, ADORA2A, AUTS2, BCR, CRKL, CYLD, DAAM1, DACH1, DGKB, DIAPH2, GAD2, GNG7, GUCY1A3, HPCA, HSPBP1, KCNAB1, KCTD17, KIF5C, MN1, PDE1B, PEG3, PIK3C2B, PIP5K1C, PPP1R16B, PTPN7, RARB, RASGRP2, RGS20, RXRG, SMARCD3, SNX27, SRGAP3, TAC1, TLE4, TOMM34, TOMM70A, ULK1
blue	UpWithAlzheimers_Blalock__ADvsCT_inCA1	Brain	0.0243	134	ACACB, ADD3, ADORA2A, AFF1, AHCYL1, AHNAK, AKAP13, ANKRD26, ARG2, ARHGEF10, ARID1A, ATG4B, BAHD1, BBX, BCAR3, BCL2, CALD1, CAST, CDC14B, CDC42EP1, CHD2, CIC, COTL1, CPSF6, CREBBP, CRY1, CSNK1E, CYLD, DAPP1, DCLRE1C, DCP1A, DDX21, DGCR8, DGKD, DIAPH2, DLG1, DUSP3, ELAVL1, EPS8, FBXO11, FGF1, FNBP1, FYCO1, GAB1, GMEB2, HBP1, HDAC9, HSPB8, IKBKB, INPPL1, IPO9, IRAK1, IRS2, ITPK1, KBTBD2, KCNN3, KCTD…
blue	UpWithAlzheimers_Liang__ADvsCT_inCA1	Brain	0.0449	34	ABAT, ANKS1B, ARHGEF7, ASH1L, BICD2, BMP2K, CAP1, CASKIN1, CDK5RAP2, DGCR8, FAM120A, GPR155, KIF5B, LRCH3, MAP1B, MEF2D, PACS2, PGM2L1, PIK3R2, PRPF40A, RB1, RBPJ, RGL1, SEPT11, SPEN, TBC1D22A, TESK1, TNK2, TRIO, TROVE2, TSPYL4, TTL, UBN1, WWC1
blue	black_M11__CTX	Brain	0.0493	35	APPBP2, ARIH1, CAP2, CCNT1, CEP350, CEP68, EHBP1, ENC1, GNAO1, GNB1, HIPK1, KIF5C, KLHL24, KPNB1, NCALD, NEK1, NKTR, NR1D2, NRIP1, NUMA1, PHACTR2, PPFIBP1, PPM1A, PPP1R12A, PRPF40A, RASA2, SPAG9, SPEN, TNPO1, TROVE2, UBN1, USP1, WIPI2, ZBTB38, ZMYM2
brown	turquoise_Cerebellum__HumanChimp	Brain	0.0487	92	ABLIM1, ADARB1, ARID3A, ATXN1, BAZ2A, BCL9, CAMKK2, CBFA2T3, CCDC6, CDH15, CDKN2D, CHD9, CHN2, CIT, CREB1, CSNK1G2, CTCF, CTNNA1, DCP2, DEK, DMTF1, DYRK1A, E2F3, EIF4B, FABP7, FKBP4, FNBP4, FOXJ2, FOXJ3, FUBP1, H1F0, INSM1, JARID2, KCTD2, LMNB1, LMO3, MAML1, MAP3K10, MAP7, MAX, MECP2, MTSS1, NAB1, NFX1, NUP50, NUPL2, OXSR1, PALM, PANK3, PAX6, PCBP3, PCGF3, PHC2, PHF21A, PHF3, POLE3, PPFIA4, PRKAR…
cyan	Astrocyte_definite__Cahoy	Brain	1.6e-09	21	ATP1A2, AXL, BMPR1B, CD38, CLDN10, DMP1, EGFR, EMP2, GJA1, MGST1, NTSR2, PBXIP1, SDC4, SLC13A3, SLC1A2, SLC1A3, SLC4A4, SLC7A2, THRSP, TMEM47, TNFRSF19
cyan	Astrocyte_probable__Cahoy	Brain	5.98e-07	72	ADRA2A, ALG3, ATP13A4, ATP1A2, ATP1B2, AXL, BMPR1B, CD38, CD63, CLDN10, CMTM3, CMTM6, CNTFR, CRISPLD2, CST3, CTSO, CYR61, DHRS3, DMP1, ECE2, EDNRB, EGFR, ELOVL5, EMP2, ERN1, FDX1, FGFRL1, FZD1, FZD4, GHR, GJA1, GPR37L1, GPRC5B, GUSB, HEPACAM, ITM2B, JAM2, LAMP2, LMAN2, LTBR, MDK, MFAP3, MGST1, MMD2, MPV17, NPC1, NTSR2, PAQR3, PAQR8, PBXIP1, PDGFC, PIGS, POFUT1, SDC4, SLC13A3, SLC1A2, SLC1A3, SLC3…
cyan	brown_M3_Astrocytes__HumanMeta	Brain	1.6e-05	25	ATP1A2, ATP1B2, AXL, CD63, CLDN10, CMTM6, CST3, DHRS3, EDNRB, EGFR, EMP2, GJA1, JAM2, LIFR, NTSR2, PBXIP1, PDGFC, SDC4, SLC1A2, SLC1A3, SLC4A4, SPARC, TMEM100, TMEM47, TOB1
cyan	Astrocyte__ABA	Brain	0.0112	7	ATP1A2, CD63, CST3, GJA1, GPR37L1, HEPACAM, SPARC
green	cyan_M4_Mitochondria__MouseMeta	Brain	2.31e-10	38	0610012G03RIK, 1810037I17RIK, 1810058I24RIK, ANAPC11, ANAPC13, ATP5J2, BANF1, BOLA2, CISD1, COX7A2, CRIP1, DYNLL1, EDF1, FAM96B, HCFC1R1, HIGD2A, HRAS, ISCA2, MED28, MRPL54, MRPS15, MRPS21, NDUFA13, NDUFC1, NEDD8, PCBD2, RNASEH2C, RPL37A, RPLP1, SEC61B, SERF2, SS18L2, TAF10, TIMM8B, TMSB10, UBL5, UFC1, UQCRQ
magenta	Astrocyte_definite__Cahoy	Brain	3.64e-13	29	ACSL6, AGT, APOE, AQP4, CCDC80, CYP4F14, EGFL6, F3, FKBP10, FOLH1, GRIN2C, GRM3, HAPLN1, HTRA1, ITGB5, LCAT, MFGE8, MLC1, MYOC, PLA2G7, SCARA3, SLC14A1, SLC27A1, SLC39A12, SLC7A10, SMO, SULT1A1, THBS4, VCAM1
magenta	Astrocyte_probable__Cahoy	Brain	5.55e-12	110	ABHD3, ACAD8, ACSL6, ADAMTS1, AGA, AGT, ANGPT1, ANTXR1, APOE, AQP4, ATP2A2, BCAN, C4B, CACHD1, CCDC80, CD320, CHST11, CIB1, CNNM3, CTBS, CTSD, CWF19L2, CYP2J9, CYP4F13, CYP4F14, EGFL6, EPHX1, ETFA, ETFB, F3, FADS1, FADS2, FAM58B, FAT1, FCGRT, FDFT1, FKBP10, FOLH1, GABRG1, GDF10, GPC4, GPC5, GPLD1, GRIN2C, GRM3, HAPLN1, HEPH, HIBADH, HRH1, HSD17B10, HTRA1, INHBB, ITGB5, ITIH3, KCNJ16, LAMB2, LCAT,…
magenta	Choroid plexus__ABA	Brain	1.94e-09	18	ACAD8, ACE, CFH, COL8A2, COL9A3, EPHX1, FADS1, KCNE2, LBP, LGALS3BP, LUM, PRLR, SLC39A12, SLCO1C1, STRA6, TCN2, TGFBI, TTR
magenta	brown_M3_Astrocytes__HumanMeta	Brain	3.1e-05	31	AGT, APOE, AQP4, CTSH, EPHX1, F3, FADS1, FADS2, FCGRT, GPC5, HEPH, HTRA1, INHBB, ITGB5, ITPR2, KCNJ16, LAMB2, LRP4, MLC1, PON2, PRCP, PTPRZ1, SCRG1, SERPINE2, SLC14A1, SLC16A1, SLC30A1, SLCO1C1, SNX7, STOM, TMEM176A
magenta	Astrocyte__ABA	Brain	0.0156	8	APOE, AQP4, BCAN, C1QA, MATN4, MFGE8, PLA2G7, SELPLG
magenta	brown_M15_Astrocyte__CTX	Brain	0.0215	36	ABCG2, AGT, APOE, AQP4, BLVRA, COPB1, CTBS, CTSH, DARS, EPHX1, F3, FADS1, GPC5, HEPH, HTRA1, ITGB5, ITPR2, KCNJ16, LAMB2, LRP4, MLC1, NGLY1, PARP2, PCSK1, PON2, PRCP, PTGDS, PTPRZ1, SCARA3, SCRG1, SEC61A2, SERPINE2, SLC14A1, SLC7A10, SLCO1C1, STOM
magenta	brown_upAging_copperHomeostatisMT1__Lu_Aging	Brain	0.0423	13	EPHX1, FADS1, FCGRT, GDF10, HEPH, HTRA1, INHBB, ITGB5, MLC1, PON2, SCRG1, SLC14A1, STOM
midnightblue	cyan_M4_Mitochondria__MouseMeta	Brain	2.11e-07	19	ACYP1, ATP5E, ATP5J, CLPP, CSTB, DNAJC15, ELOF1, LSM3, MRPS16, MRPS24, MRPS28, NDUFB7, RPL34, RPL41, RPS27L, TIMM10, UQCRH, USE1, VAMP8
midnightblue	salmon_M12_Ribosome__HumanMeta	Brain	3e-07	14	PFDN5, RPL12, RPL13A, RPL27, RPL35, RPL36, RPL36AL, RPL41, RPL6, RPL7A, RPL9, RPS13, RPS16, RPS6
purple	PostSynapticDensity_proteins__Bayes	Brain	0.00319	63	ABCD1, ADD1, ADD2, APC, ARFGEF2, ARHGAP23, CAMK2D, CDC42BPA, CDKL5, CFL1, CFL2, CLASP1, CORO2B, CPNE5, CPT1A, CS, CTNNA2, CYFIP2, DAAM2, DCLK2, DMWD, DOCK3, FAM49B, FRYL, GIT1, GNA11, GNB5, GPD2, HECW2, HNRNPA1, HTT, IARS, IMPA1, JUP, LRSAM1, MAPRE3, MARK1, MINK1, NEFL, NEFM, PACS1, PHACTR1, PHLDB1, PLCB1, PPP1CC, PPP1R7, PRKCB, RALA, RAP1GAP, RAP1GDS1, RAPH1, RHOG, RPH3A, SDCBP, SEPT8, SESTD1, S…
red	Cytoplasm_Foster__MO	Brain	0.000144	35	ADH5, AK2, ALDH2, ANXA7, AOX1, ASL, CBR1, CCT2, CCT7, DERA, EIF4A1, EIF4A2, GPT, GSTA4, GSTM2, GSTP1, HACL1, HAGH, HPGD, IDH1, IDI1, IMPDH2, LTA4H, MTHFD1, PLAA, PRDX6, PSMA5, PSMB7, RNH1, SELENBP1, SNX1, SNX2, SPR, TGM2, VARS
red	brown_downAD_mitochondrion__Blalock_AD	Brain	0.00765	33	ACTR3, ACTR6, ALAS1, ANXA7, ARPC1A, ATP5C1, ATP6V0D1, BECN1, CCNC, CCND2, COPS3, CPNE6, DDX1, DDX25, EIF2S1, GSTA4, HSF2, IDH3B, KIFAP3, MATR3, MDH2, NDUFV1, NIF3L1, OAT, PSMB4, RAB1A, RRAGA, SAMM50, SLC25A4, SMAP1, UGP2, UQCRC2, UQCRFS1
red	Mitochondria_Foster__MO	Brain	0.0231	26	AASS, ACADM, ACAT1, AK2, ALDH2, AMACR, ATP5C1, CAT, CPT2, ECHS1, GCAT, HADH, IDH1, IMMT, MTHFD1, NDUFV1, NIPSNAP1, OAT, RPL4, SLC25A4, SUCLG1, TFAM, TIMM44, TRAP1, UQCRC2, UQCRFS1
royalblue	PostSynapticDensity_proteins__Bayes	Brain	0.00436	35	ACTN1, ACTN4, ANK1, ANK2, ANXA5, CAND2, COPA, CYTH2, DNAJA1, FTH1, GAPDH, IQSEC1, KIF1A, MACF1, MAOB, MCCC2, MPRIP, MYH10, MYH14, MYH9, MYO18A, MYO1B, MYO5A, PLCB4, PLEKHA5, RAB11B, RAB5A, SHANK1, SIPA1L1, SLC25A5, SPTB, SPTBN1, SPTBN2, STXBP3, UBR4
turquoise	Neuron_probable__Cahoy	Brain	1.44e-11	309	2900064F13RIK, 9330121K16RIK, 9430021M05RIK, A830039N20RIK, ABCC8, ABCG4, ACHE, ACSL4, ACSL5, ACVR1B, ACVR2A, ANKRD13D, ARMCX1, ASPH, ASTN2, ATP1A3, ATP2B1, ATP2B2, ATP2B3, ATP6AP2, ATP6V0A1, ATP8A2, B3GALNT1, B3GALT2, B4GALNT4, B4GALT5, BACE1, BBS5, BDNF, BTBD6, C1QTNF4, CACNA1A, CACNA1B, CACNA1C, CACNA1G, CACNA1H, CACNA2D1, CACNA2D3, CADM3, CALCA, CASD1, CBLN4, CCDC112, CCK, CCKBR, CD200, CD34,…
turquoise	Neuron_definite__Cahoy	Brain	4.09e-11	80	9330121K16RIK, ACHE, ASPH, ATP1A3, ATP2B3, C1QTNF4, CACNA1B, CACNA2D3, CALCA, CBLN4, CCK, CCKBR, CDH8, CDH9, CHGB, CLSTN2, CLSTN3, COL19A1, CX3CL1, CXADR, CXCL12, CYB561, DPP10, EPHA3, EPHA7, GABRA1, GABRA5, GABRB3, GABRG2, GFRA2, GLRA2, GPR22, GRIN1, GRM7, GRP, ICAM5, KCNF1, KCNQ5, KCNV1, L1CAM, LGI2, LPL, LY6H, NELL1, NPTX1, NPTXR, NRXN3, NTNG1, NXPH2, PCSK2, PTPRK, RASGRF1, RELN, RSPO2, SCG2, …
turquoise	mutationMouseOrHumanOrBoth__JAXdiseaseGene	Brain	1.47e-05	300	ABCA3, ABCB4, ABCC8, ACHE, ACP2, ACSL4, ACVR1, ACVR2A, ACVR2B, ADRB1, ALG1, ALG12, ALG2, ALG6, ALG8, ALG9, APP, ARL6IP5, ARSA, ASAH1, ATL1, ATP1A3, ATP1B1, ATP2B2, ATP2C1, ATP6AP2, B3GALNT1, B4GALT7, BBS5, BCAM, BDNF, BLM, BMP4, BPGM, BSCL2, BSG, BTD, C1GALT1C1, CACNA1A, CACNA1C, CACNA1H, CD200, CD55, CHRM3, CHRNA5, CHRNB2, CISD2, CLCN2, CLCN3, CLCN6, CLCN7, CLN3, CLN5, CLN6, CLN8, CLU, CNTNAP2, …
turquoise	GlutamatergicNeuronsInMouseCortex_Sugino__MO	Brain	0.00126	86	ATP1A1, ATP2B2, ATP6V0B, ATP9B, B3GALT2, BCAP29, BDNF, CCKBR, CD34, CDIPT, COL8A1, CPE, CTGF, CTSZ, CX3CL1, CXCL12, CYB5R1, CYP7B1, DGAT2, DHRS7, DKK3, DYRK3, E2F1, EGFL7, EMB, EPHA4, EPHA7, EPHB6, EXT1, EXTL1, EXTL2, FAM105A, GPM6A, GPM6B, GRM8, HS2ST1, HTR1F, IL17RA, ITGAV, ITM2C, LEPROT, LETMD1, LSM8, MAN2A1, MAS1, MMP17, NELL2, NEO1, NPTX1, NPTX2, NRP1, NTSR1, OLFML2B, P4HA1, PCSK2, PLD3, PLX…
turquoise	Alzheimer_possible__DiseaseGenes	Brain	0.00142	81	ABCA2, ABCC8, ABCG1, ABCG4, ACHE, ACSL4, ADAM10, ADCYAP1R1, ADORA2B, ADRB1, APH1A, APH1B, APOA1BP, APP, BACE1, BDNF, CHRM1, CHRNB2, CLU, COMT, CPE, CRHBP, CTSS, CYP46A1, DHCR24, EBP, EFEMP1, GBA, GOLM1, GRB14, GRIN2B, GSTO1, HFE, HMGCR, HSD11B1, HTR6, IGF1R, INSR, KCNJ11, LDLR, LIPA, LPL, LRP1, LRP3, LRPAP1, LRRTM3, M6PR, MINPP1, NCAM2, NCSTN, NDST2, NDUFA8, NDUFB8, NDUFS4, NFKBIA, NPC2, NPY, NTR…
turquoise	CA3specific_Newrzella__CA1vsCA3	Brain	0.00353	84	ACSL4, ADAM11, APLP2, AQP11, ARL6IP5, ATP2B3, ATP6V0B, ATP8A1, BMP7, CD200, CDH2, CDH9, CHGB, CIB2, CIDEA, CLSTN2, CNNM2, CREB3L1, CRLF1, CUTC, DGKE, DHCR24, DHRS7, E2F1, EFEMP1, EIF1B, EPDR1, EPHA3, EPHA4, EPHA5, EPHA7, EPHB1, FKRP, FLRT3, FUT8, GALNT14, GOLM1, GPC1, GRB14, GRIK4, ISLR, ITGA7, KCNA1, KCNK4, KCNQ5, LHFPL5, LRTM2, MGAT4B, MGAT4C, MGAT5, MIA2, NDUFS4, NMB, NPTX1, NPY2R, NRP1, ORAI2…
turquoise	Autism_susceptability_genes_from_Pinto_et_al_2010__Voineagu	Brain	0.00645	36	ASTN1, ASTN2, CACNA1C, CD83, CDH10, CDH18, CDH9, CNTN3, CNTN4, CNTNAP2, DHCR7, DPP10, DPP6, GABRA5, GABRB1, GABRB3, GALNT9, GRID1, GRIK2, GRM8, HTR3A, IL1RAPL1, MDGA2, MET, NLGN1, NLGN3, NRCAM, NRXN1, PCDH10, PCDH9, SCN7A, SLC4A10, SLC9A9, ST7, TDO2, WNT2
turquoise	mutationHuman__JAXdiseaseGene	Brain	0.00754	220	ABCB4, ABCC8, ACHE, ACSL4, ACVR1, ADRB1, ALG1, ALG12, ALG2, ALG6, ALG8, ALG9, APP, ARL6IP5, ATL1, ATP1A3, ATP1B1, ATP2B2, ATP2C1, ATP6AP2, B3GALNT1, B4GALT7, BBS5, BCAM, BDNF, BMP4, BPGM, BSCL2, BSG, BTD, C1GALT1C1, CACNA1A, CACNA1C, CACNA1H, CD55, CHRNA5, CHRNB2, CISD2, CLCN2, CLCN7, CLN8, CNTNAP2, COL11A2, COL18A1, COL1A1, COL3A1, COMT, CRELD1, CRLF1, CRTAP, CTNS, CTSC, CXCL12, CXCR4, CYBA, CYP…
turquoise	mutationMouseAndHuman__JAXdiseaseGene	Brain	0.00816	84	ABCA3, ACVR2B, ARSA, ASAH1, BLM, CACNA1A, CLCN7, CLN3, CLN5, CLN6, CLN8, COCH, COL11A2, COL1A1, COL3A1, CP, CRTAP, CTNS, CTSA, CTSK, DHCR7, EBP, EFEMP1, EIF2AK3, ELN, ELOVL4, ERCC5, EXT2, FBLN5, FGFR1, FLNA, GAA, GALNS, GBA, GLA, GLB1, GLRB, GM2A, GPC3, HEXA, HFE, HPS1, HSD11B1, JAG1, KCNA1, KCNH2, KIT, L1CAM, LDLR, LIPA, LMBR1, LPL, MAN2B1, MANBA, MC4R, MCOLN1, MGAT2, NAGLU, NDN, NEU1, NPR2, OST…
yellow	PostSynapticDensity_proteins__Bayes	Brain	5.81e-47	262	AARS, AASDHPPT, ABCD3, ABR, ACACA, ACO2, ACOT7, ACTB, ACTR2, AGK, AHCY, AK5, ALDH3A2, ALDOC, AMPD2, AMPH, ANKFY1, ANXA11, ANXA6, AP1B1, AP1M1, AP2A1, AP2A2, AP2M1, AP3B1, AP3B2, AP3D1, AP3M2, AP3S2, APPL1, ARCN1, ARF1, ARHGAP21, ARHGEF2, ARPC2, ATIC, ATP5A1, ATP5B, ATP6V1B2, ATP6V1C1, ATP6V1E1, BIN1, CAMK2A, CAMK2B, CAMKK1, CAMKV, CAND1, CAPN1, CAPZA2, CASK, CC2D1A, CDC42, CDC42BPB, CKAP5, CKB, C…
yellow	Cytoplasm_Foster__MO	Brain	8.72e-11	57	AARS, ACTB, AHCY, ALDH1B1, ALDOC, ANXA6, AP1M1, APEH, ARF4, ATIC, CAPZA2, CNDP2, COASY, COPS2, COPS4, CSAD, DDC, DNM2, DPP3, EIF4G1, ENO1, GDI1, GDI2, GNE, GOT1, GPHN, HMGCS1, HSP90AB1, LCP1, LDHA, MDH1, MGLL, MSN, MTAP, NAP1L1, NARS, NIT1, OTUB1, PAICS, PCYT2, PFKM, PGAM1, PLS3, PPP2R1A, PREP, PSMB8, RDX, SEC14L2, SRM, TPI1, TSTA3, TUBB3, TWF1, USP5, WDR1, YARS, YWHAE
yellow	DownWithAlzheimers_Liang__ADvsCT_inCA1	Brain	6.18e-09	113	AARS, ACACA, ACO2, ACSL1, ACTR10, AHCY, AK5, AMZ2, AP2A2, AP2M1, AP3M2, ARCN1, ARF1, ATIC, ATP5A1, ATP5B, ATP6V1B2, ATP6V1E1, BIN1, BUB3, CAMK2B, CAND1, CCNDBP1, CDC42, CKAP5, CLASP2, COPS6, CPSF3, CRMP1, CSNK1A1, CUL3, DDX3X, DHX29, DHX30, DLGAP1, DNM1L, DYNC1I1, DYNC1LI1, EAPP, ECHDC1, EEF1A2, EFTUD2, EIF3B, ETF1, EXOC6B, FAM120B, FBXO21, FHOD3, GADD45GIP1, GDI2, GLO1, GLS, GOPC, GOT1, GOT2, GU…
yellow	PresynapticCompartmentProteins_Morciano__MO	Brain	9.81e-09	28	ACTB, ALDOC, AP2A1, AP2A2, AP2M1, ARF1, ATP6V1B2, ATP6V1C1, ATP6V1E1, CAMK2A, DNM1, ENO1, GNB2, LDHA, NSF, RAB14, RAB1B, RAB2B, RAB3A, RAB3B, RAC1, SEPT7, STXBP1, TUBA1C, TUBA4A, TUBB3, VDAC1, YWHAE
yellow	green_M5_Mitochondria__HumanMeta	Brain	9.61e-08	45	ACO2, ACOT7, AHCY, ANXA6, AP2A2, AP2M1, AP3B2, AP3M2, APEH, ATP6V1E1, CAMK2B, CDC37, CKB, COPS7A, CRMP1, DCTN1, DDA1, DNM1, DOC2A, EEF1A2, ENO2, FHOD3, KCNAB2, KLC1, MADD, MAP2K4, MAST1, NAPA, NCDN, NIT2, OGDHL, OTUB1, PFKP, PPP2R1A, PTGES2, SLC25A22, SNX17, STX1A, TAGLN3, TPI1, TUBA1C, TUBA4A, UBA1, UQCRC1, USP11
yellow	Autism_associated_module_M12__Voineagu	Brain	2.06e-07	57	AARS, ABCF2, ACOT7, ANXA6, AP2A1, AP2A2, AP2M1, AP3B2, ARHGEF11, ATG16L1, ATP6V1B2, ATP6V1E1, BTRC, CAMK2B, CAMKV, CPNE4, CUL3, DCTN1, DDX24, DHDDS, DNM1, DOC2A, DOPEY1, EEF1A2, ENO2, GLS, GOT2, HK1, LDB2, MADD, MICAL2, MTMR7, NAPB, NCKIPSD, NSF, NUAK1, NUDCD3, OSBPL10, OTUB1, PFKP, PHKG2, PLCL2, PREP, PRPF19, RAI1, RNF123, RNMT, SLC25A12, SPRYD3, STX1A, STXBP1, TAGLN3, THOC5, UNC13A, USP5, VPS33…
yellow	DownWithAlzheimers_Blalock__ADvsCT_inCA1	Brain	3.6e-07	156	AASDHPPT, ACO2, ACOT7, ACTB, ACTR10, ACTR2, AHCY, AK5, AKAP10, ALDOC, AP2A2, AP3B2, ARF1, ARPC2, ATG7, ATIC, ATP5A1, ATP5B, ATP6V1C1, ATP6V1E1, BOP1, CABIN1, CAMK2A, CC2D1A, CDC40, CDC5L, CDK7, CKAP5, CLASP2, COPS2, COPS7A, COPS8, CORO1C, CSNK2A1, CTNNB1, CUL3, DCTN1, DMXL2, DNM1L, DZIP1, ECHDC1, EGR4, ENO2, FBXO21, FBXO3, FLOT1, GDI1, GLS, GNAL, GOT1, GOT2, GSPT2, GUCY1B3, HCFC2, ITPKA, JRKL, KA…
yellow	blue_downAging_mitochondria_synapse__Lu_Aging	Brain	0.000297	60	ACO2, ACOT7, ACTR2, AMPH, AP3B2, ARHGEF2, ATP5A1, BLMH, CALB1, CDC40, COPS2, CRMP1, CSNK1D, CSNK2A1, DCTN1, DDX3X, DLGAP1, DNM1, DNM1L, DYNC1I1, GDI2, GFPT1, GTF2F1, HSP90AB1, ITPKA, JAK1, LANCL1, LDHA, LIG4, MAP2K1, MAP2K4, MAPK10, MDH1, MICAL2, NAPA, NCDN, NSF, PDE4D, PDK2, PDK3, PIP5K1B, PLCL2, PPFIA2, PPP2R1A, PPP3CB, PRKCG, PRPS1, RAB3A, RAB3GAP2, RAF1, RND1, SNAP25, SNX4, STMN2, TAGLN3, TNP…
yellow	blue_M16_Neuron__CTX	Brain	0.000711	95	AASDHPPT, ACTR2, AKAP10, ALDH3A2, ARF1, ARF4, ARPC2, ATP6V1B2, ATP6V1C1, BTRC, BUB3, CAMK2A, CAND1, CAPZA2, CASK, CDC40, CDC5L, CLASP2, COASY, COPS8, CORO1C, CSNK1A1, CTTN, CUL3, DDX3X, DNM1L, ECHDC1, ELP4, ETF1, ETFDH, FLII, FTO, FTSJ3, GDI2, GFPT1, GLS, GPHN, GTF2I, GTPBP4, GUCY1B3, HADHA, HMGCS1, HSPA4L, HSPD1, INTS5, KIF3A, KLHDC2, LANCL1, LIG4, LRPPRC, MAP2K1, MAPK8, ME2, NAP1L1, NCOR1, NDRG…
yellow	green_M10_GlutamatergicSynapticFunction__CTX	Brain	0.00125	56	ABCD3, AGTPBP1, AHCTF1, AP2A2, AP2M1, AP3B2, ARF1, ARF4, ARHGEF17, CABIN1, CAMK2B, CAPN1, CDC42BPB, DBN1, DCTN1, DDX5, DHX29, DHX30, DOC2A, EEF1A2, FAM65A, FLOT1, FXR1, HDAC5, HGS, ISYNA1, ITPKA, KATNB1, KCNAB2, MAP1S, MAPK8IP2, MCCC1, MFN2, MPPED1, NAP1L1, NAPA, NCDN, NUP160, PDK2, PEX5, PLS3, RAB3A, RFC1, RHOT1, SBF1, SERBP1, SLC25A22, SRM, STRN4, STX1A, TSC2, USP11, USP5, VPS13C, YTHDC1, ZCCHC8
yellow	Recycling_endosome_TGN_Foster__MO	Brain	0.00192	30	ACTR2, AP1B1, AP1M1, AP3B1, ARF4, ARPC2, CAPZA2, CRYZ, DDX3X, DNAJA2, DNM1, DNM2, EEF1A2, EEF2, EIF4G1, ETF1, KRAS, METAP1, METAP2, MSN, NAPA, NIT1, PA2G4, PAICS, PCBP2, PRPS1, RAB14, RAB18, RDX, WDR1
yellow	Plasma_membrane_Foster__MO	Brain	0.00277	25	ABCE1, ACSL1, ACTR2, AP2A1, AP3B1, ARF4, CAPZA2, CRYZ, DNM2, EEF1A2, EIF4G1, ENO1, GAK, KRAS, LDHA, METAP1, NIT1, PAICS, PYGB, RAB14, RAB18, RHOA, STRAP, VPS26A, WDR1

## Sheet: Palazzolo-Wang
InputCategories	UserDefinedCategories	Type	CorrectedPvalues	NumGenes	CategoryGenes
black	413404_KEGG_Ribosome,_eukaryotes__Kegg_NCBI_Biosystems	PW_Lists	0.00823	16	RPL17, RPL22L1, RPL24, RPL27A, RPL35A, RPL39, RPLP2, RPS11, RPS12, RPS14, RPS18, RPS19, RPS20, RPS23, RPS24, RPSA
black	441_KEGG_Ribosome__Kegg_NCBI_Biosystems	PW_Lists	0.00985	16	RPL17, RPL22L1, RPL24, RPL27A, RPL35A, RPL39, RPLP2, RPS11, RPS12, RPS14, RPS18, RPS19, RPS20, RPS23, RPS24, RPSA
black	83036_KEGG_Ribosome__Kegg_NCBI_Biosystems	PW_Lists	0.00985	16	RPL17, RPL22L1, RPL24, RPL27A, RPL35A, RPL39, RPLP2, RPS11, RPS12, RPS14, RPS18, RPS19, RPS20, RPS23, RPS24, RPSA
black	530746_REACTOME_SRP-dependent_cotranslational_protein_targeting_to_membrane__Reactome_NCBI_Biosystems	PW_Lists	0.0353	17	RPL17, RPL24, RPL27A, RPL35A, RPL39, RPLP2, RPS11, RPS12, RPS14, RPS18, RPS19, RPS20, RPS23, RPS24, RPSA, SEC61G, TRAM1
black	105977_REACTOME_Peptide_chain_elongation__Reactome_NCBI_Biosystems	PW_Lists	0.0375	15	RPL17, RPL24, RPL27A, RPL35A, RPL39, RPLP2, RPS11, RPS12, RPS14, RPS18, RPS19, RPS20, RPS23, RPS24, RPSA
black	105978_REACTOME_Eukaryotic_Translation_Termination__Reactome_NCBI_Biosystems	PW_Lists	0.0375	15	RPL17, RPL24, RPL27A, RPL35A, RPL39, RPLP2, RPS11, RPS12, RPS14, RPS18, RPS19, RPS20, RPS23, RPS24, RPSA
black	106077_REACTOME_Viral_mRNA_Translation__Reactome_NCBI_Biosystems	PW_Lists	0.0375	15	RPL17, RPL24, RPL27A, RPL35A, RPL39, RPLP2, RPS11, RPS12, RPS14, RPS18, RPS19, RPS20, RPS23, RPS24, RPSA
blue	106439_REACTOME_Signalling_by_NGF__Reactome_NCBI_Biosystems	PW_Lists	3.36e-05	59	ADCY6, ADORA2A, AKAP13, AKT3, AP2B1, ARHGEF6, ARHGEF7, ARHGEF9, CAMK4, CDKN1A, CLTA, DNM3, DUSP3, FGD1, FGD4, FOXO1, IKBKB, IRAK1, IRS1, IRS2, MAPK1, MAPK11, MAPK14, MAPK3, MAPKAPK2, MCF2L, MLST8, MYD88, NGFR, PDE1B, PDE1C, PDPK1, PHLPP1, PIK3CB, PIK3R2, PLCG1, PPP2CA, PPP2R5D, PREX1, PRKACA, PRKACB, PRKAR1B, PRKCD, PRKCI, RASGRF2, RICTOR, RPS6KA2, RPS6KA5, SHC3, SOS2, SQSTM1, SRC, STAT3, TIAM1, …
blue	106502_REACTOME_Signaling_by_Rho_GTPases__Reactome_NCBI_Biosystems	PW_Lists	0.000158	38	AKAP13, ARAP3, ARHGAP1, ARHGAP20, ARHGAP31, ARHGAP32, ARHGAP33, ARHGAP44, ARHGAP5, ARHGDIB, ARHGEF6, ARHGEF7, ARHGEF9, BCR, FAM13A, FAM13B, FGD1, FGD4, G3BP2, MCF2L, OPHN1, PIK3R2, PREX1, PRR5, RASGRF2, RHOB, RHOBTB2, RHOF, RHOT2, SOS2, SRGAP1, SRGAP2, SRGAP3, STARD8, TIAM1, TIAM2, TRIO, VAV3
blue	106503_REACTOME_Rho_GTPase_cycle__Reactome_NCBI_Biosystems	PW_Lists	0.000158	38	AKAP13, ARAP3, ARHGAP1, ARHGAP20, ARHGAP31, ARHGAP32, ARHGAP33, ARHGAP44, ARHGAP5, ARHGDIB, ARHGEF6, ARHGEF7, ARHGEF9, BCR, FAM13A, FAM13B, FGD1, FGD4, G3BP2, MCF2L, OPHN1, PIK3R2, PREX1, PRR5, RASGRF2, RHOB, RHOBTB2, RHOF, RHOT2, SOS2, SRGAP1, SRGAP2, SRGAP3, STARD8, TIAM1, TIAM2, TRIO, VAV3
blue	198845_WikiPathways_Insulin_Signaling__Wiki_Pathways_NCBI_Biosystems	PW_Lists	0.000265	45	ARHGAP33, CAP1, CBLB, EGR1, ENPP1, FLOT2, FOXO1, GAB1, IKBKB, INPP4A, INPPL1, IRS1, IRS2, KIF5B, MAP2K7, MAP3K1, MAP3K11, MAP3K13, MAP3K3, MAP4K4, MAP4K5, MAPK1, MAPK11, MAPK14, MAPK3, MAPK4, MAPK6, PDPK1, PIK3CB, PIK3R2, PIK3R3, PRKAA2, PRKCD, PRKCI, PTPN11, RPS6KA2, RPS6KA5, SGK2, SHC3, SORBS1, SOS2, SRF, STXBP4, TBC1D4, XBP1
blue	477114_REACTOME_Signal_Transduction__Reactome_NCBI_Biosystems	PW_Lists	0.00138	154	ADCY6, ADORA2A, AKAP13, AKT3, AP2B1, ARAP3, ARHGAP1, ARHGAP20, ARHGAP31, ARHGAP32, ARHGAP33, ARHGAP44, ARHGAP5, ARHGDIB, ARHGEF6, ARHGEF7, ARHGEF9, ATP6V1C2, BCR, CAB39, CAMK4, CDKN1A, CLTA, CREBBP, CRKL, DGKB, DGKD, DGKI, DGKQ, DGKZ, DNM3, DUSP3, EPS15, ERBB2, ESR1, FAM13A, FAM13B, FGD1, FGD4, FGF1, FOXO1, G3BP2, GAB1, GAB2, GNAI1, GNAO1, GNAQ, GNB1, GNB4, GNG7, GRB7, HTR1B, HTR1D, IKBKB, IRAK1,…
blue	6001_synapsedb_pad_3552__Palazzolo_and_Wang	PW_Lists	0.00144	427	AAK1, ABAT, ACBD3, ACLY, ACOT11, ACP6, ACSS1, ACTG1, ACTN2, ACTR1A, ADAR, ADD3, ADORA2A, AGAP1, AGAP2, AHI1, AKAP9, ALDH18A1, ALDH5A1, AMOTL2, ANKS1B, AP1G1, AP2B1, AP4E1, AP4M1, API5, APPBP2, ARAP3, ARF3, ARG2, ARHGAP32, ARHGEF7, ARHGEF9, ARID5B, ASAP2, ASB7, ATP2A3, ATRX, BAIAP2, BAIAP3, BCL2, BCL2L1, BCR, BCS1L, BICD1, BICD2, BRD8, BRSK1, BRSK2, CADPS, CALCOCO1, CAMK1G, CAMK4, CAPN5, CAPZA1, C…
blue	528_KEGG_Chronic_myeloid_leukemia__Kegg_NCBI_Biosystems	PW_Lists	0.0196	25	AKT3, BCL2L1, BCR, CBLB, CDK6, CDKN1A, CRKL, GAB2, IKBKB, IKBKG, MAPK1, MAPK3, PIK3CB, PIK3R2, PIK3R3, PIK3R5, PTPN11, RB1, SHC3, SHC4, SMAD3, SMAD4, SOS2, STAT5A, STAT5B
blue	83116_KEGG_Chronic_myeloid_leukemia__Kegg_NCBI_Biosystems	PW_Lists	0.0196	25	AKT3, BCL2L1, BCR, CBLB, CDK6, CDKN1A, CRKL, GAB2, IKBKB, IKBKG, MAPK1, MAPK3, PIK3CB, PIK3R2, PIK3R3, PIK3R5, PTPN11, RB1, SHC3, SHC4, SMAD3, SMAD4, SOS2, STAT5A, STAT5B
blue	6012_postsynaptic_proteomics_pad_1097__Palazzolo_and_Wang	PW_Lists	0.0262	175	AAK1, ACLY, ACTN2, ACTR1A, ADAR, ADD3, AGAP1, AGAP2, AKAP9, ANKS1B, AP2B1, ARF3, ARHGEF7, ARHGEF9, ASB7, ATRX, BAIAP2, BCR, BRSK1, CALCOCO1, CAPZA1, CASKIN1, CLIP2, CLTA, CPEB3, CRYAB, CSNK1E, CSRP1, CTNND1, CTNND2, CYLD, DAAM1, DAB2IP, DCLK1, DGKB, DGKZ, DIP2B, DIRAS2, DLAT, DLG1, DLG2, DLG3, DLGAP2, DLGAP4, DLST, DMD, DNAJC6, DNM3, DPYSL2, DPYSL5, DUSP3, EEA1, EHD3, EHMT2, ELMO2, EPB41L1, EPN2,…
blue	366171_REACTOME_Cytokine_Signaling_in_Immune_system__Reactome_NCBI_Biosystems	PW_Lists	0.0288	50	ADAR, ARIH1, CRKL, EGR1, GAB2, IKBKB, IKBKG, INPPL1, IRAK1, IRF8, IRS1, IRS2, JAK2, KPNB1, LCK, MAP3K3, MAPK1, MAPK3, MYD88, NFKB2, NUP54, NUP62, NUP98, NUPL1, PELI3, PIAS1, PIK3CB, PIK3R2, PIK3R3, PLCG1, PML, PRKACB, PRKCD, PTPN11, PTPN6, SQSTM1, STAT2, STAT3, STAT5A, STAT5B, TAB3, TOLLIP, TPR, TRAF6, TRIM25, UBC, UBE2E1, UBE2L6, UBE2N, YWHAZ
blue	160140_REACTOME_Signaling_by_Interleukins__Reactome_NCBI_Biosystems	PW_Lists	0.031	29	CRKL, GAB2, IKBKB, IKBKG, INPPL1, IRAK1, JAK2, LCK, MAP3K3, MAPK1, MAPK3, MYD88, NFKB2, PELI3, PIK3CB, PIK3R2, PIK3R3, PRKACB, PTPN11, PTPN6, SQSTM1, STAT3, STAT5A, STAT5B, TAB3, TOLLIP, TRAF6, UBE2N, YWHAZ
blue	100064_KEGG_Neurotrophin_signaling_pathway__Kegg_NCBI_Biosystems	PW_Lists	0.0431	34	AKT3, ARHGDIB, BCL2, CAMK4, CRKL, GAB1, IKBKB, IRAK1, IRS1, IRS2, MAP2K7, MAP3K1, MAP3K3, MAPK1, MAPK11, MAPK14, MAPK3, MAPKAPK2, NGFR, PIK3CB, PIK3R2, PIK3R3, PIK3R5, PLCG1, PRKCD, PTPN11, RPS6KA2, RPS6KA5, SHC3, SHC4, SOS2, TRAF6, YWHAG, YWHAZ
blue	101143_KEGG_Neurotrophin_signaling_pathway__Kegg_NCBI_Biosystems	PW_Lists	0.0431	34	AKT3, ARHGDIB, BCL2, CAMK4, CRKL, GAB1, IKBKB, IRAK1, IRS1, IRS2, MAP2K7, MAP3K1, MAP3K3, MAPK1, MAPK11, MAPK14, MAPK3, MAPKAPK2, NGFR, PIK3CB, PIK3R2, PIK3R3, PIK3R5, PLCG1, PRKCD, PTPN11, RPS6KA2, RPS6KA5, SHC3, SHC4, SOS2, TRAF6, YWHAG, YWHAZ
blue	106459_REACTOME_NGF_signalling_via_TRKA_from_the_plasma_membrane__Reactome_NCBI_Biosystems	PW_Lists	0.0484	37	ADCY6, ADORA2A, AKT3, AP2B1, CAMK4, CDKN1A, CLTA, DNM3, DUSP3, FOXO1, IRS1, IRS2, MAPK1, MAPK11, MAPK14, MAPK3, MAPKAPK2, MLST8, PDE1B, PDE1C, PDPK1, PHLPP1, PIK3CB, PIK3R2, PLCG1, PPP2CA, PPP2R5D, PRKACA, PRKACB, PRKAR1B, PRKCD, RICTOR, RPS6KA2, RPS6KA5, SHC3, SRC, STAT3
cyan	460_KEGG_Cytokine-cytokine_receptor_interaction__Kegg_NCBI_Biosystems	PW_Lists	0.00365	12	BMPR1B, CNTFR, CSF1, EGFR, GHR, INHBA, LIFR, LTBR, PDGFB, PDGFC, TNFRSF11B, TNFRSF19
cyan	83051_KEGG_Cytokine-cytokine_receptor_interaction__Kegg_NCBI_Biosystems	PW_Lists	0.00365	12	BMPR1B, CNTFR, CSF1, EGFR, GHR, INHBA, LIFR, LTBR, PDGFB, PDGFC, TNFRSF11B, TNFRSF19
cyan	161020_REACTOME_GPCR_ligand_binding__Reactome_NCBI_Biosystems	PW_Lists	0.0395	15	ADRA2A, CALCRL, CNR1, CRH, EDNRB, FZD1, FZD3, FZD4, HEBP1, NPFFR1, NTSR2, PTHLH, RAMP2, S1PR1, TRHR
darkgrey	508_KEGG_Maturity_onset_diabetes_of_the_young__Kegg_NCBI_Biosystems	PW_Lists	0.0226	4	HES1, HHEX, NEUROD1, NKX2-2
darkgrey	83096_KEGG_Maturity_onset_diabetes_of_the_young__Kegg_NCBI_Biosystems	PW_Lists	0.0226	4	HES1, HHEX, NEUROD1, NKX2-2
green	105976_REACTOME_Eukaryotic_Translation_Elongation__Reactome_NCBI_Biosystems	PW_Lists	0.000487	21	EEF1B2, RPL18A, RPL21, RPL22, RPL23, RPL23A, RPL26, RPL29, RPL30, RPL31, RPL36A, RPL37A, RPL38, RPLP1, RPS17, RPS21, RPS25, RPS26, RPS27, RPS28, RPS29
green	530746_REACTOME_SRP-dependent_cotranslational_protein_targeting_to_membrane__Reactome_NCBI_Biosystems	PW_Lists	0.00097	23	RPL18A, RPL21, RPL22, RPL23, RPL23A, RPL26, RPL29, RPL30, RPL31, RPL36A, RPL37A, RPL38, RPLP1, RPS17, RPS21, RPS25, RPS26, RPS27, RPS28, RPS29, SEC61B, SRP14, SRP19
green	105977_REACTOME_Peptide_chain_elongation__Reactome_NCBI_Biosystems	PW_Lists	0.00145	20	RPL18A, RPL21, RPL22, RPL23, RPL23A, RPL26, RPL29, RPL30, RPL31, RPL36A, RPL37A, RPL38, RPLP1, RPS17, RPS21, RPS25, RPS26, RPS27, RPS28, RPS29
green	105978_REACTOME_Eukaryotic_Translation_Termination__Reactome_NCBI_Biosystems	PW_Lists	0.00145	20	RPL18A, RPL21, RPL22, RPL23, RPL23A, RPL26, RPL29, RPL30, RPL31, RPL36A, RPL37A, RPL38, RPLP1, RPS17, RPS21, RPS25, RPS26, RPS27, RPS28, RPS29
green	106077_REACTOME_Viral_mRNA_Translation__Reactome_NCBI_Biosystems	PW_Lists	0.00145	20	RPL18A, RPL21, RPL22, RPL23, RPL23A, RPL26, RPL29, RPL30, RPL31, RPL36A, RPL37A, RPL38, RPLP1, RPS17, RPS21, RPS25, RPS26, RPS27, RPS28, RPS29
green	413404_KEGG_Ribosome,_eukaryotes__Kegg_NCBI_Biosystems	PW_Lists	0.00229	20	RPL18A, RPL21, RPL22, RPL23, RPL23A, RPL26, RPL29, RPL30, RPL31, RPL36A, RPL37A, RPL38, RPLP1, RPS17, RPS21, RPS25, RPS26, RPS27, RPS28, RPS29
green	441_KEGG_Ribosome__Kegg_NCBI_Biosystems	PW_Lists	0.00287	20	RPL18A, RPL21, RPL22, RPL23, RPL23A, RPL26, RPL29, RPL30, RPL31, RPL36A, RPL37A, RPL38, RPLP1, RPS17, RPS21, RPS25, RPS26, RPS27, RPS28, RPS29
green	83036_KEGG_Ribosome__Kegg_NCBI_Biosystems	PW_Lists	0.00287	20	RPL18A, RPL21, RPL22, RPL23, RPL23A, RPL26, RPL29, RPL30, RPL31, RPL36A, RPL37A, RPL38, RPLP1, RPS17, RPS21, RPS25, RPS26, RPS27, RPS28, RPS29
green	198853_WikiPathways_Cytoplasmic_Ribosomal_Proteins__Wiki_Pathways_NCBI_Biosystems	PW_Lists	0.00443	20	RPL18A, RPL21, RPL22, RPL23, RPL23A, RPL26, RPL29, RPL30, RPL31, RPL36A, RPL37A, RPL38, RPLP1, RPS17, RPS21, RPS25, RPS26, RPS27, RPS28, RPS29
green	366242_REACTOME_Nonsense_Mediated_Decay_Independent_of_the_Exon_Junction_Complex__Reactome_NCBI_Biosystems	PW_Lists	0.00443	20	RPL18A, RPL21, RPL22, RPL23, RPL23A, RPL26, RPL29, RPL30, RPL31, RPL36A, RPL37A, RPL38, RPLP1, RPS17, RPS21, RPS25, RPS26, RPS27, RPS28, RPS29
green	106074_REACTOME_Influenza_Viral_RNA_Transcription_and_Replication__Reactome_NCBI_Biosystems	PW_Lists	0.00783	21	POLR2L, RPL18A, RPL21, RPL22, RPL23, RPL23A, RPL26, RPL29, RPL30, RPL31, RPL36A, RPL37A, RPL38, RPLP1, RPS17, RPS21, RPS25, RPS26, RPS27, RPS28, RPS29
green	105968_REACTOME_Formation_of_a_pool_of_free_40S_subunits__Reactome_NCBI_Biosystems	PW_Lists	0.0101	20	RPL18A, RPL21, RPL22, RPL23, RPL23A, RPL26, RPL29, RPL30, RPL31, RPL36A, RPL37A, RPL38, RPLP1, RPS17, RPS21, RPS25, RPS26, RPS27, RPS28, RPS29
midnightblue	413404_KEGG_Ribosome,_eukaryotes__Kegg_NCBI_Biosystems	PW_Lists	1.39e-10	18	RPL12, RPL13A, RPL14, RPL27, RPL32, RPL34, RPL35, RPL36, RPL36AL, RPL41, RPL6, RPL7A, RPL9, RPS13, RPS16, RPS27A, RPS27L, RPS6
midnightblue	441_KEGG_Ribosome__Kegg_NCBI_Biosystems	PW_Lists	1.75e-10	18	RPL12, RPL13A, RPL14, RPL27, RPL32, RPL34, RPL35, RPL36, RPL36AL, RPL41, RPL6, RPL7A, RPL9, RPS13, RPS16, RPS27A, RPS27L, RPS6
midnightblue	83036_KEGG_Ribosome__Kegg_NCBI_Biosystems	PW_Lists	1.75e-10	18	RPL12, RPL13A, RPL14, RPL27, RPL32, RPL34, RPL35, RPL36, RPL36AL, RPL41, RPL6, RPL7A, RPL9, RPS13, RPS16, RPS27A, RPS27L, RPS6
midnightblue	105977_REACTOME_Peptide_chain_elongation__Reactome_NCBI_Biosystems	PW_Lists	2.76e-08	16	RPL12, RPL13A, RPL14, RPL27, RPL32, RPL34, RPL35, RPL36, RPL41, RPL6, RPL7A, RPL9, RPS13, RPS16, RPS27A, RPS6
midnightblue	105978_REACTOME_Eukaryotic_Translation_Termination__Reactome_NCBI_Biosystems	PW_Lists	2.76e-08	16	RPL12, RPL13A, RPL14, RPL27, RPL32, RPL34, RPL35, RPL36, RPL41, RPL6, RPL7A, RPL9, RPS13, RPS16, RPS27A, RPS6
midnightblue	106077_REACTOME_Viral_mRNA_Translation__Reactome_NCBI_Biosystems	PW_Lists	2.76e-08	16	RPL12, RPL13A, RPL14, RPL27, RPL32, RPL34, RPL35, RPL36, RPL41, RPL6, RPL7A, RPL9, RPS13, RPS16, RPS27A, RPS6
midnightblue	106074_REACTOME_Influenza_Viral_RNA_Transcription_and_Replication__Reactome_NCBI_Biosystems	PW_Lists	3.92e-08	17	POLR2D, RPL12, RPL13A, RPL14, RPL27, RPL32, RPL34, RPL35, RPL36, RPL41, RPL6, RPL7A, RPL9, RPS13, RPS16, RPS27A, RPS6
midnightblue	105976_REACTOME_Eukaryotic_Translation_Elongation__Reactome_NCBI_Biosystems	PW_Lists	5.07e-08	16	RPL12, RPL13A, RPL14, RPL27, RPL32, RPL34, RPL35, RPL36, RPL41, RPL6, RPL7A, RPL9, RPS13, RPS16, RPS27A, RPS6
midnightblue	160955_REACTOME_L13a-mediated_translational_silencing_of_Ceruloplasmin_expression__Reactome_NCBI_Biosystems	PW_Lists	5.59e-08	17	EIF2S2, RPL12, RPL13A, RPL14, RPL27, RPL32, RPL34, RPL35, RPL36, RPL41, RPL6, RPL7A, RPL9, RPS13, RPS16, RPS27A, RPS6
midnightblue	105973_REACTOME_GTP_hydrolysis_and_joining_of_the_60S_ribosomal_subunit__Reactome_NCBI_Biosystems	PW_Lists	6.65e-08	17	EIF2S2, RPL12, RPL13A, RPL14, RPL27, RPL32, RPL34, RPL35, RPL36, RPL41, RPL6, RPL7A, RPL9, RPS13, RPS16, RPS27A, RPS6
midnightblue	198853_WikiPathways_Cytoplasmic_Ribosomal_Proteins__Wiki_Pathways_NCBI_Biosystems	PW_Lists	7.5e-08	16	RPL12, RPL13A, RPL14, RPL27, RPL32, RPL34, RPL35, RPL36, RPL41, RPL6, RPL7A, RPL9, RPS13, RPS16, RPS27A, RPS6
midnightblue	366242_REACTOME_Nonsense_Mediated_Decay_Independent_of_the_Exon_Junction_Complex__Reactome_NCBI_Biosystems	PW_Lists	7.5e-08	16	RPL12, RPL13A, RPL14, RPL27, RPL32, RPL34, RPL35, RPL36, RPL41, RPL6, RPL7A, RPL9, RPS13, RPS16, RPS27A, RPS6
midnightblue	530746_REACTOME_SRP-dependent_cotranslational_protein_targeting_to_membrane__Reactome_NCBI_Biosystems	PW_Lists	1.11e-07	17	RPL12, RPL13A, RPL14, RPL27, RPL32, RPL34, RPL35, RPL36, RPL41, RPL6, RPL7A, RPL9, RPS13, RPS16, RPS27A, RPS6, SRP9
midnightblue	105968_REACTOME_Formation_of_a_pool_of_free_40S_subunits__Reactome_NCBI_Biosystems	PW_Lists	1.59e-07	16	RPL12, RPL13A, RPL14, RPL27, RPL32, RPL34, RPL35, RPL36, RPL41, RPL6, RPL7A, RPL9, RPS13, RPS16, RPS27A, RPS6
midnightblue	105966_REACTOME_Eukaryotic_Translation_Initiation__Reactome_NCBI_Biosystems	PW_Lists	2.12e-07	17	EIF2S2, RPL12, RPL13A, RPL14, RPL27, RPL32, RPL34, RPL35, RPL36, RPL41, RPL6, RPL7A, RPL9, RPS13, RPS16, RPS27A, RPS6
midnightblue	105967_REACTOME_Cap-dependent_Translation_Initiation__Reactome_NCBI_Biosystems	PW_Lists	2.12e-07	17	EIF2S2, RPL12, RPL13A, RPL14, RPL27, RPL32, RPL34, RPL35, RPL36, RPL41, RPL6, RPL7A, RPL9, RPS13, RPS16, RPS27A, RPS6
midnightblue	366240_REACTOME_Nonsense-Mediated_Decay__Reactome_NCBI_Biosystems	PW_Lists	1.41e-06	16	RPL12, RPL13A, RPL14, RPL27, RPL32, RPL34, RPL35, RPL36, RPL41, RPL6, RPL7A, RPL9, RPS13, RPS16, RPS27A, RPS6
midnightblue	366241_REACTOME_Nonsense_Mediated_Decay_Enhanced_by_the_Exon_Junction_Complex__Reactome_NCBI_Biosystems	PW_Lists	1.41e-06	16	RPL12, RPL13A, RPL14, RPL27, RPL32, RPL34, RPL35, RPL36, RPL41, RPL6, RPL7A, RPL9, RPS13, RPS16, RPS27A, RPS6
midnightblue	105965_REACTOME_Translation__Reactome_NCBI_Biosystems	PW_Lists	1.51e-06	18	EIF2S2, RPL12, RPL13A, RPL14, RPL27, RPL32, RPL34, RPL35, RPL36, RPL41, RPL6, RPL7A, RPL9, RPS13, RPS16, RPS27A, RPS6, SRP9
midnightblue	106068_REACTOME_Influenza_Life_Cycle__Reactome_NCBI_Biosystems	PW_Lists	8.03e-06	17	POLR2D, RPL12, RPL13A, RPL14, RPL27, RPL32, RPL34, RPL35, RPL36, RPL41, RPL6, RPL7A, RPL9, RPS13, RPS16, RPS27A, RPS6
midnightblue	106067_REACTOME_Influenza_Infection__Reactome_NCBI_Biosystems	PW_Lists	1.3e-05	17	POLR2D, RPL12, RPL13A, RPL14, RPL27, RPL32, RPL34, RPL35, RPL36, RPL41, RPL6, RPL7A, RPL9, RPS13, RPS16, RPS27A, RPS6
midnightblue	106230_REACTOME_Metabolism_of_proteins__Reactome_NCBI_Biosystems	PW_Lists	0.0117	21	EIF2S2, GNPNAT1, PFDN4, PFDN5, RPL12, RPL13A, RPL14, RPL27, RPL32, RPL34, RPL35, RPL36, RPL41, RPL6, RPL7A, RPL9, RPS13, RPS16, RPS27A, RPS6, SRP9
red	105782_REACTOME_S_Phase__Reactome_NCBI_Biosystems	PW_Lists	1.37e-07	27	CCNE1, CCNE2, CUL1, LIG1, MCM3, MCM5, ORC4, POLD2, PRIM1, PRIM2, PSMA5, PSMA6, PSMA7, PSMB1, PSMB4, PSMB5, PSMB7, PSMC3, PSMC4, PSMD10, PSMD12, PSMD13, PSMD14, PSMD2, PSMD3, PSMD6, RFC5
red	160941_REACTOME_Mitotic_G1-G1S_phases__Reactome_NCBI_Biosystems	PW_Lists	4.46e-07	29	CCND2, CCNE1, CCNE2, CUL1, HDAC1, LIN9, MCM3, MCM5, ORC4, PRIM1, PRIM2, PSMA5, PSMA6, PSMA7, PSMB1, PSMB4, PSMB5, PSMB7, PSMC3, PSMC4, PSMD10, PSMD12, PSMD13, PSMD14, PSMD2, PSMD3, PSMD6, RBBP4, RRM2
red	105784_REACTOME_Synthesis_of_DNA__Reactome_NCBI_Biosystems	PW_Lists	1.02e-06	24	LIG1, MCM3, MCM5, ORC4, POLD2, PRIM1, PRIM2, PSMA5, PSMA6, PSMA7, PSMB1, PSMB4, PSMB5, PSMB7, PSMC3, PSMC4, PSMD10, PSMD12, PSMD13, PSMD14, PSMD2, PSMD3, PSMD6, RFC5
red	105771_REACTOME_SCF(Skp2)-mediated_degradation_of_p27p21__Reactome_NCBI_Biosystems	PW_Lists	1.12e-06	19	CCNE1, CCNE2, CUL1, PSMA5, PSMA6, PSMA7, PSMB1, PSMB4, PSMB5, PSMB7, PSMC3, PSMC4, PSMD10, PSMD12, PSMD13, PSMD14, PSMD2, PSMD3, PSMD6
red	105828_REACTOME_SCF-beta-TrCP_mediated_degradation_of_Emi1__Reactome_NCBI_Biosystems	PW_Lists	2.57e-06	18	CDC20, CUL1, PSMA5, PSMA6, PSMA7, PSMB1, PSMB4, PSMB5, PSMB7, PSMC3, PSMC4, PSMD10, PSMD12, PSMD13, PSMD14, PSMD2, PSMD3, PSMD6
red	105769_REACTOME_G1S_Transition__Reactome_NCBI_Biosystems	PW_Lists	3.83e-06	25	CCNE1, CCNE2, CUL1, MCM3, MCM5, ORC4, PRIM1, PRIM2, PSMA5, PSMA6, PSMA7, PSMB1, PSMB4, PSMB5, PSMB7, PSMC3, PSMC4, PSMD10, PSMD12, PSMD13, PSMD14, PSMD2, PSMD3, PSMD6, RRM2
red	105937_REACTOME_Gene_Expression__Reactome_NCBI_Biosystems	PW_Lists	5.26e-06	72	AARS2, CARS2, CCNC, CDK9, CNOT10, CNOT8, DDX20, DDX23, EDC3, EEF1G, EIF2S1, EIF3C, EIF3D, EIF3F, EIF3G, EIF3H, EIF3I, EIF4A1, EIF4A2, EXOSC2, EXOSC9, FARS2, FARSA, GTF2H2, GTF2H3, GTF3C3, HARS, HNRNPL, MED17, NARS2, NR3C2, NRBP1, NUP155, NUP205, NUP43, NUP85, NUP93, PAN2, POLR1C, POLR2B, POLR2C, POLR2G, PSMA5, PSMA6, PSMA7, PSMB1, PSMB4, PSMB5, PSMB7, PSMC3, PSMC4, PSMD10, PSMD12, PSMD13, PSMD14,…
red	105765_REACTOME_Cell_Cycle,_Mitotic__Reactome_NCBI_Biosystems	PW_Lists	9.4e-06	44	ANAPC1, CCND2, CCNE1, CCNE2, CDC16, CDC20, CEP290, CEP78, CUL1, DCTN3, HDAC1, LIG1, LIN9, MCM3, MCM5, NUP43, NUP85, ORC4, POLD2, PRIM1, PRIM2, PSMA5, PSMA6, PSMA7, PSMB1, PSMB4, PSMB5, PSMB7, PSMC3, PSMC4, PSMD10, PSMD12, PSMD13, PSMD14, PSMD2, PSMD3, PSMD6, RBBP4, RFC5, RRM2, SEC13, STAG2, TUBB4B, TUBG1
red	105741_REACTOME_p53-Dependent_G1S_DNA_damage_checkpoint__Reactome_NCBI_Biosystems	PW_Lists	1.14e-05	18	CCNE1, CCNE2, PSMA5, PSMA6, PSMA7, PSMB1, PSMB4, PSMB5, PSMB7, PSMC3, PSMC4, PSMD10, PSMD12, PSMD13, PSMD14, PSMD2, PSMD3, PSMD6
red	105743_REACTOME_p53-Dependent_G1_DNA_Damage_Response__Reactome_NCBI_Biosystems	PW_Lists	1.14e-05	18	CCNE1, CCNE2, PSMA5, PSMA6, PSMA7, PSMB1, PSMB4, PSMB5, PSMB7, PSMC3, PSMC4, PSMD10, PSMD12, PSMD13, PSMD14, PSMD2, PSMD3, PSMD6
red	105833_REACTOME_APCC_Cdc20_mediated_degradation_of_Securin__Reactome_NCBI_Biosystems	PW_Lists	1.29e-05	19	ANAPC1, CDC16, CDC20, PSMA5, PSMA6, PSMA7, PSMB1, PSMB4, PSMB5, PSMB7, PSMC3, PSMC4, PSMD10, PSMD12, PSMD13, PSMD14, PSMD2, PSMD3, PSMD6
red	530733_REACTOME_Cell_Cycle__Reactome_NCBI_Biosystems	PW_Lists	1.48e-05	48	ANAPC1, CCND2, CCNE1, CCNE2, CDC16, CDC20, CEP290, CEP78, CUL1, DCTN3, HDAC1, HSPA2, LIG1, LIN9, LMNA, MCM3, MCM5, NUP43, NUP85, ORC4, POLD2, PRIM1, PRIM2, PSMA5, PSMA6, PSMA7, PSMB1, PSMB4, PSMB5, PSMB7, PSMC3, PSMC4, PSMD10, PSMD12, PSMD13, PSMD14, PSMD2, PSMD3, PSMD6, RBBP4, RFC5, RRM2, RUVBL1, SEC13, STAG2, SYNE2, TUBB4B, TUBG1
red	105739_REACTOME_Cell_Cycle_Checkpoints__Reactome_NCBI_Biosystems	PW_Lists	1.48e-05	25	ANAPC1, CCNE1, CCNE2, CDC16, CDC20, MCM3, MCM5, ORC4, PSMA5, PSMA6, PSMA7, PSMB1, PSMB4, PSMB5, PSMB7, PSMC3, PSMC4, PSMD10, PSMD12, PSMD13, PSMD14, PSMD2, PSMD3, PSMD6, RFC5
red	105820_REACTOME_MG1_Transition__Reactome_NCBI_Biosystems	PW_Lists	1.64e-05	21	MCM3, MCM5, ORC4, PRIM1, PRIM2, PSMA5, PSMA6, PSMA7, PSMB1, PSMB4, PSMB5, PSMB7, PSMC3, PSMC4, PSMD10, PSMD12, PSMD13, PSMD14, PSMD2, PSMD3, PSMD6
red	105898_REACTOME_DNA_Replication_Pre-Initiation__Reactome_NCBI_Biosystems	PW_Lists	1.64e-05	21	MCM3, MCM5, ORC4, PRIM1, PRIM2, PSMA5, PSMA6, PSMA7, PSMB1, PSMB4, PSMB5, PSMB7, PSMC3, PSMC4, PSMD10, PSMD12, PSMD13, PSMD14, PSMD2, PSMD3, PSMD6
red	105740_REACTOME_G1S_DNA_Damage_Checkpoints__Reactome_NCBI_Biosystems	PW_Lists	2.27e-05	18	CCNE1, CCNE2, PSMA5, PSMA6, PSMA7, PSMB1, PSMB4, PSMB5, PSMB7, PSMC3, PSMC4, PSMD10, PSMD12, PSMD13, PSMD14, PSMD2, PSMD3, PSMD6
red	105770_REACTOME_Cyclin_E_associated_events_during_G1S_transition__Reactome_NCBI_Biosystems	PW_Lists	2.43e-05	19	CCNE1, CCNE2, CUL1, PSMA5, PSMA6, PSMA7, PSMB1, PSMB4, PSMB5, PSMB7, PSMC3, PSMC4, PSMD10, PSMD12, PSMD13, PSMD14, PSMD2, PSMD3, PSMD6
red	105821_REACTOME_Assembly_of_the_pre-replicative_complex__Reactome_NCBI_Biosystems	PW_Lists	2.43e-05	19	MCM3, MCM5, ORC4, PSMA5, PSMA6, PSMA7, PSMB1, PSMB4, PSMB5, PSMB7, PSMC3, PSMC4, PSMD10, PSMD12, PSMD13, PSMD14, PSMD2, PSMD3, PSMD6
red	477126_REACTOME_Cross-presentation_of_soluble_exogenous_antigens_(endosomes)__Reactome_NCBI_Biosystems	PW_Lists	2.95e-05	16	PSMA5, PSMA6, PSMA7, PSMB1, PSMB4, PSMB5, PSMB7, PSMC3, PSMC4, PSMD10, PSMD12, PSMD13, PSMD14, PSMD2, PSMD3, PSMD6
red	105826_REACTOME_Regulation_of_APCC_activators_between_G1S_and_early_anaphase__Reactome_NCBI_Biosystems	PW_Lists	3.14e-05	20	ANAPC1, CDC16, CDC20, CUL1, PSMA5, PSMA6, PSMA7, PSMB1, PSMB4, PSMB5, PSMB7, PSMC3, PSMC4, PSMD10, PSMD12, PSMD13, PSMD14, PSMD2, PSMD3, PSMD6
red	105783_REACTOME_Cyclin_A_Cdk2-associated_events_at_S_phase_entry__Reactome_NCBI_Biosystems	PW_Lists	3.29e-05	19	CCNE1, CCNE2, CUL1, PSMA5, PSMA6, PSMA7, PSMB1, PSMB4, PSMB5, PSMB7, PSMC3, PSMC4, PSMD10, PSMD12, PSMD13, PSMD14, PSMD2, PSMD3, PSMD6
red	105983_REACTOME_HIV_Infection__Reactome_NCBI_Biosystems	PW_Lists	3.97e-05	32	CDK9, GTF2H2, GTF2H3, HCK, LIG1, NUP155, NUP205, NUP43, NUP85, NUP93, POLR2B, POLR2C, POLR2G, PSMA5, PSMA6, PSMA7, PSMB1, PSMB4, PSMB5, PSMB7, PSMC3, PSMC4, PSMD10, PSMD12, PSMD13, PSMD14, PSMD2, PSMD3, PSMD6, RAE1, SLC25A4, TSG101
red	105786_REACTOME_Switching_of_origins_to_a_post-replicative_state__Reactome_NCBI_Biosystems	PW_Lists	4.43e-05	19	MCM3, MCM5, ORC4, PSMA5, PSMA6, PSMA7, PSMB1, PSMB4, PSMB5, PSMB7, PSMC3, PSMC4, PSMD10, PSMD12, PSMD13, PSMD14, PSMD2, PSMD3, PSMD6
red	105787_REACTOME_Orc1_removal_from_chromatin__Reactome_NCBI_Biosystems	PW_Lists	4.43e-05	19	MCM3, MCM5, ORC4, PSMA5, PSMA6, PSMA7, PSMB1, PSMB4, PSMB5, PSMB7, PSMC3, PSMC4, PSMD10, PSMD12, PSMD13, PSMD14, PSMD2, PSMD3, PSMD6
red	105835_REACTOME_APCC_Cdh1_mediated_degradation_of_Cdc20_and_other_APCC_Cdh1_targeted_proteins_in_late_mitosisearly_G1__Reactome_NCBI_Biosystems	PW_Lists	4.43e-05	19	ANAPC1, CDC16, CDC20, PSMA5, PSMA6, PSMA7, PSMB1, PSMB4, PSMB5, PSMB7, PSMC3, PSMC4, PSMD10, PSMD12, PSMD13, PSMD14, PSMD2, PSMD3, PSMD6
red	477135_REACTOME_Metabolism__Reactome_NCBI_Biosystems	PW_Lists	5.27e-05	87	AASS, ACADM, ACAT1, AK2, ALAS1, ALDH2, ALDH6A1, AMACR, ASL, ASNS, ATP5C1, BCKDHB, CAD, CAT, CCNC, CDO1, CPT2, CTPS, CTPS2, CYP1B1, ECHS1, GBE1, GMPR2, GNPAT, GPT, GRHL1, GSTA4, GSTM5, GSTP1, HACL1, HADH, HSD17B4, IDH1, IDH3B, IDI1, IMPDH2, LTA4H, MDH2, MED17, MOCS3, MTHFD1, MVD, MVK, NDUFV1, NEU4, NT5C, NT5C2, NUP155, NUP205, NUP43, NUP85, NUP93, OAT, PFKL, PHGDH, PHKA2, PLIN2, PMVK, PSMA5, PSMA6…
red	105831_REACTOME_APCC_Cdc20_mediated_degradation_of_mitotic_proteins__Reactome_NCBI_Biosystems	PW_Lists	5.93e-05	19	ANAPC1, CDC16, CDC20, PSMA5, PSMA6, PSMA7, PSMB1, PSMB4, PSMB5, PSMB7, PSMC3, PSMC4, PSMD10, PSMD12, PSMD13, PSMD14, PSMD2, PSMD3, PSMD6
red	105836_REACTOME_Autodegradation_of_Cdh1_by_Cdh1_APCC__Reactome_NCBI_Biosystems	PW_Lists	6e-05	18	ANAPC1, CDC16, PSMA5, PSMA6, PSMA7, PSMB1, PSMB4, PSMB5, PSMB7, PSMC3, PSMC4, PSMD10, PSMD12, PSMD13, PSMD14, PSMD2, PSMD3, PSMD6
red	445_KEGG_Proteasome__Kegg_NCBI_Biosystems	PW_Lists	6.64e-05	15	PSMA5, PSMA6, PSMA7, PSMB1, PSMB4, PSMB5, PSMB7, PSMC3, PSMC4, PSMD12, PSMD13, PSMD14, PSMD2, PSMD3, PSMD6
red	83040_KEGG_Proteasome__Kegg_NCBI_Biosystems	PW_Lists	6.64e-05	15	PSMA5, PSMA6, PSMA7, PSMB1, PSMB4, PSMB5, PSMB7, PSMC3, PSMC4, PSMD12, PSMD13, PSMD14, PSMD2, PSMD3, PSMD6
red	106010_REACTOME_Host_Interactions_of_HIV_factors__Reactome_NCBI_Biosystems	PW_Lists	7.68e-05	25	CDK9, HCK, NUP155, NUP205, NUP43, NUP85, NUP93, PSMA5, PSMA6, PSMA7, PSMB1, PSMB4, PSMB5, PSMB7, PSMC3, PSMC4, PSMD10, PSMD12, PSMD13, PSMD14, PSMD2, PSMD3, PSMD6, RAE1, SLC25A4
red	105829_REACTOME_Activation_of_APCC_and_APCC_Cdc20_mediated_degradation_of_mitotic_proteins__Reactome_NCBI_Biosystems	PW_Lists	7.89e-05	19	ANAPC1, CDC16, CDC20, PSMA5, PSMA6, PSMA7, PSMB1, PSMB4, PSMB5, PSMB7, PSMC3, PSMC4, PSMD10, PSMD12, PSMD13, PSMD14, PSMD2, PSMD3, PSMD6
red	105901_REACTOME_Removal_of_licensing_factors_from_origins__Reactome_NCBI_Biosystems	PW_Lists	7.89e-05	19	MCM3, MCM5, ORC4, PSMA5, PSMA6, PSMA7, PSMB1, PSMB4, PSMB5, PSMB7, PSMC3, PSMC4, PSMD10, PSMD12, PSMD13, PSMD14, PSMD2, PSMD3, PSMD6
red	105686_REACTOME_Regulation_of_activated_PAK-2p34_by_proteasome_mediated_degradation__Reactome_NCBI_Biosystems	PW_Lists	9.23e-05	16	PSMA5, PSMA6, PSMA7, PSMB1, PSMB4, PSMB5, PSMB7, PSMC3, PSMC4, PSMD10, PSMD12, PSMD13, PSMD14, PSMD2, PSMD3, PSMD6
red	105788_REACTOME_CDK-mediated_phosphorylation_and_removal_of_Cdc6__Reactome_NCBI_Biosystems	PW_Lists	9.23e-05	16	PSMA5, PSMA6, PSMA7, PSMB1, PSMB4, PSMB5, PSMB7, PSMC3, PSMC4, PSMD10, PSMD12, PSMD13, PSMD14, PSMD2, PSMD3, PSMD6
red	106176_REACTOME_Regulation_of_ornithine_decarboxylase_(ODC)__Reactome_NCBI_Biosystems	PW_Lists	9.23e-05	16	PSMA5, PSMA6, PSMA7, PSMB1, PSMB4, PSMB5, PSMB7, PSMC3, PSMC4, PSMD10, PSMD12, PSMD13, PSMD14, PSMD2, PSMD3, PSMD6
red	105825_REACTOME_APCC-mediated_degradation_of_cell_cycle_proteins__Reactome_NCBI_Biosystems	PW_Lists	9.23e-05	20	ANAPC1, CDC16, CDC20, CUL1, PSMA5, PSMA6, PSMA7, PSMB1, PSMB4, PSMB5, PSMB7, PSMC3, PSMC4, PSMD10, PSMD12, PSMD13, PSMD14, PSMD2, PSMD3, PSMD6
red	160944_REACTOME_Regulation_of_mitotic_cell_cycle__Reactome_NCBI_Biosystems	PW_Lists	9.23e-05	20	ANAPC1, CDC16, CDC20, CUL1, PSMA5, PSMA6, PSMA7, PSMB1, PSMB4, PSMB5, PSMB7, PSMC3, PSMC4, PSMD10, PSMD12, PSMD13, PSMD14, PSMD2, PSMD3, PSMD6
red	105824_REACTOME_CDT1_association_with_the_CDC6_ORC_origin_complex__Reactome_NCBI_Biosystems	PW_Lists	0.000107	17	ORC4, PSMA5, PSMA6, PSMA7, PSMB1, PSMB4, PSMB5, PSMB7, PSMC3, PSMC4, PSMD10, PSMD12, PSMD13, PSMD14, PSMD2, PSMD3, PSMD6
red	105796_REACTOME_Ubiquitin-dependent_degradation_of_Cyclin_D__Reactome_NCBI_Biosystems	PW_Lists	0.000132	16	PSMA5, PSMA6, PSMA7, PSMB1, PSMB4, PSMB5, PSMB7, PSMC3, PSMC4, PSMD10, PSMD12, PSMD13, PSMD14, PSMD2, PSMD3, PSMD6
red	105797_REACTOME_Ubiquitin-dependent_degradation_of_Cyclin_D1__Reactome_NCBI_Biosystems	PW_Lists	0.000132	16	PSMA5, PSMA6, PSMA7, PSMB1, PSMB4, PSMB5, PSMB7, PSMC3, PSMC4, PSMD10, PSMD12, PSMD13, PSMD14, PSMD2, PSMD3, PSMD6
red	106017_REACTOME_Vif-mediated_degradation_of_APOBEC3G__Reactome_NCBI_Biosystems	PW_Lists	0.000132	16	PSMA5, PSMA6, PSMA7, PSMB1, PSMB4, PSMB5, PSMB7, PSMC3, PSMC4, PSMD10, PSMD12, PSMD13, PSMD14, PSMD2, PSMD3, PSMD6
red	106026_REACTOME_Vpu_mediated_degradation_of_CD4__Reactome_NCBI_Biosystems	PW_Lists	0.000132	16	PSMA5, PSMA6, PSMA7, PSMB1, PSMB4, PSMB5, PSMB7, PSMC3, PSMC4, PSMD10, PSMD12, PSMD13, PSMD14, PSMD2, PSMD3, PSMD6
red	160939_REACTOME_Autodegradation_of_the_E3_ubiquitin_ligase_COP1__Reactome_NCBI_Biosystems	PW_Lists	0.000132	16	PSMA5, PSMA6, PSMA7, PSMB1, PSMB4, PSMB5, PSMB7, PSMC3, PSMC4, PSMD10, PSMD12, PSMD13, PSMD14, PSMD2, PSMD3, PSMD6
red	106169_REACTOME_Metabolism_of_amino_acids_and_derivatives__Reactome_NCBI_Biosystems	PW_Lists	0.000177	28	AASS, ACAT1, ALDH6A1, ASL, ASNS, BCKDHB, CDO1, GPT, OAT, PHGDH, PSMA5, PSMA6, PSMA7, PSMB1, PSMB4, PSMB5, PSMB7, PSMC3, PSMC4, PSMD10, PSMD12, PSMD13, PSMD14, PSMD2, PSMD3, PSMD6, PSPH, QDPR
red	105899_REACTOME_Regulation_of_DNA_replication__Reactome_NCBI_Biosystems	PW_Lists	0.00018	19	MCM3, MCM5, ORC4, PSMA5, PSMA6, PSMA7, PSMB1, PSMB4, PSMB5, PSMB7, PSMC3, PSMC4, PSMD10, PSMD12, PSMD13, PSMD14, PSMD2, PSMD3, PSMD6
red	105744_REACTOME_Stabilization_of_p53__Reactome_NCBI_Biosystems	PW_Lists	0.000187	16	PSMA5, PSMA6, PSMA7, PSMB1, PSMB4, PSMB5, PSMB7, PSMC3, PSMC4, PSMD10, PSMD12, PSMD13, PSMD14, PSMD2, PSMD3, PSMD6
red	105747_REACTOME_p53-Independent_G1S_DNA_damage_checkpoint__Reactome_NCBI_Biosystems	PW_Lists	0.000187	16	PSMA5, PSMA6, PSMA7, PSMB1, PSMB4, PSMB5, PSMB7, PSMC3, PSMC4, PSMD10, PSMD12, PSMD13, PSMD14, PSMD2, PSMD3, PSMD6
red	105748_REACTOME_p53-Independent_DNA_Damage_Response__Reactome_NCBI_Biosystems	PW_Lists	0.000187	16	PSMA5, PSMA6, PSMA7, PSMB1, PSMB4, PSMB5, PSMB7, PSMC3, PSMC4, PSMD10, PSMD12, PSMD13, PSMD14, PSMD2, PSMD3, PSMD6
red	105749_REACTOME_Ubiquitin_Mediated_Degradation_of_Phosphorylated_Cdc25A__Reactome_NCBI_Biosystems	PW_Lists	0.000187	16	PSMA5, PSMA6, PSMA7, PSMB1, PSMB4, PSMB5, PSMB7, PSMC3, PSMC4, PSMD10, PSMD12, PSMD13, PSMD14, PSMD2, PSMD3, PSMD6
red	187212_REACTOME_Destabilization_of_mRNA_by_AUF1_(hnRNP_D0)__Reactome_NCBI_Biosystems	PW_Lists	0.000501	16	PSMA5, PSMA6, PSMA7, PSMB1, PSMB4, PSMB5, PSMB7, PSMC3, PSMC4, PSMD10, PSMD12, PSMD13, PSMD14, PSMD2, PSMD3, PSMD6
red	106245_REACTOME_Formation_of_tubulin_folding_intermediates_by_CCTTriC__Reactome_NCBI_Biosystems	PW_Lists	0.000533	10	CCT2, CCT3, CCT4, CCT5, CCT6A, CCT7, TCP1, TUBB2A, TUBB2B, TUBB4B
red	105897_REACTOME_DNA_Replication__Reactome_NCBI_Biosystems	PW_Lists	0.00146	29	CDC20, LIG1, MCM3, MCM5, NUP43, NUP85, ORC4, POLD2, PRIM1, PRIM2, PSMA5, PSMA6, PSMA7, PSMB1, PSMB4, PSMB5, PSMB7, PSMC3, PSMC4, PSMD10, PSMD12, PSMD13, PSMD14, PSMD2, PSMD3, PSMD6, RFC5, SEC13, STAG2
red	477124_REACTOME_ER-Phagosome_pathway__Reactome_NCBI_Biosystems	PW_Lists	0.00167	16	PSMA5, PSMA6, PSMA7, PSMB1, PSMB4, PSMB5, PSMB7, PSMC3, PSMC4, PSMD10, PSMD12, PSMD13, PSMD14, PSMD2, PSMD3, PSMD6
red	198786_WikiPathways_Proteasome_Degradation__Wiki_Pathways_NCBI_Biosystems	PW_Lists	0.0017	15	PSMA5, PSMA6, PSMA7, PSMB1, PSMB4, PSMB5, PSMB7, PSMC3, PSMC4, PSMD10, PSMD12, PSMD13, PSMD2, PSMD3, PSMD6
red	106510_REACTOME_Signaling_by_Wnt__Reactome_NCBI_Biosystems	PW_Lists	0.00195	17	CUL1, PSMA5, PSMA6, PSMA7, PSMB1, PSMB4, PSMB5, PSMB7, PSMC3, PSMC4, PSMD10, PSMD12, PSMD13, PSMD14, PSMD2, PSMD3, PSMD6
red	106511_REACTOME_Degradation_of_beta-catenin_by_the_destruction_complex__Reactome_NCBI_Biosystems	PW_Lists	0.00195	17	CUL1, PSMA5, PSMA6, PSMA7, PSMB1, PSMB4, PSMB5, PSMB7, PSMC3, PSMC4, PSMD10, PSMD12, PSMD13, PSMD14, PSMD2, PSMD3, PSMD6
red	105685_REACTOME_Regulation_of_Apoptosis__Reactome_NCBI_Biosystems	PW_Lists	0.00221	16	PSMA5, PSMA6, PSMA7, PSMB1, PSMB4, PSMB5, PSMB7, PSMC3, PSMC4, PSMD10, PSMD12, PSMD13, PSMD14, PSMD2, PSMD3, PSMD6
red	106246_REACTOME_Folding_of_actin_by_CCTTriC__Reactome_NCBI_Biosystems	PW_Lists	0.00462	7	CCT2, CCT3, CCT4, CCT5, CCT6A, CCT7, TCP1
red	132956_KEGG_Metabolic_pathways__Kegg_NCBI_Biosystems	PW_Lists	0.00645	80	AASS, ACADM, ACAT1, ACO1, ADH5, AK2, ALAS1, ALDH2, ALDH6A1, ALOX12B, AMACR, AOX1, ASL, ASNS, ATP5C1, ATP6V0D1, BCKDHB, CAD, CAT, CBR1, CDO1, COQ3, COQ5, COQ6, CRYL1, CTPS, CTPS2, ECHS1, GBE1, GLDC, GMDS, GMPPA, GMPPB, GNPDA2, GPT, HADH, HSD17B4, IDH1, IDH3B, IDI1, IMPDH2, LTA4H, MDH2, MECR, MTHFD1, MTM1, MVD, MVK, NANS, NDUFV1, NT5C, NT5C2, OAT, PAFAH1B3, PFKL, PGP, PHGDH, PI4KB, PIP5K1A, PLCD3, …
red	160943_REACTOME_Mitotic_M-MG1_phases__Reactome_NCBI_Biosystems	PW_Lists	0.00717	26	CDC20, MCM3, MCM5, NUP43, NUP85, ORC4, PRIM1, PRIM2, PSMA5, PSMA6, PSMA7, PSMB1, PSMB4, PSMB5, PSMB7, PSMC3, PSMC4, PSMD10, PSMD12, PSMD13, PSMD14, PSMD2, PSMD3, PSMD6, SEC13, STAG2
red	477122_REACTOME_Antigen_processing-Cross_presentation__Reactome_NCBI_Biosystems	PW_Lists	0.00822	16	PSMA5, PSMA6, PSMA7, PSMB1, PSMB4, PSMB5, PSMB7, PSMC3, PSMC4, PSMD10, PSMD12, PSMD13, PSMD14, PSMD2, PSMD3, PSMD6
red	106244_REACTOME_Prefoldin_mediated_transfer_of_substrate__to_CCTTriC__Reactome_NCBI_Biosystems	PW_Lists	0.0181	10	CCT2, CCT3, CCT4, CCT5, CCT6A, CCT7, TCP1, TUBB2A, TUBB2B, TUBB4B
red	106241_REACTOME_Protein_folding__Reactome_NCBI_Biosystems	PW_Lists	0.0186	14	CCT2, CCT3, CCT4, CCT5, CCT6A, CCT7, FBXW9, KIFC3, LONP2, TBCD, TCP1, TUBB2A, TUBB2B, TUBB4B
red	187211_REACTOME_Regulation_of_mRNA_Stability_by_Proteins_that_Bind_AU-rich_Elements__Reactome_NCBI_Biosystems	PW_Lists	0.022	18	EXOSC2, EXOSC9, PSMA5, PSMA6, PSMA7, PSMB1, PSMB4, PSMB5, PSMB7, PSMC3, PSMC4, PSMD10, PSMD12, PSMD13, PSMD14, PSMD2, PSMD3, PSMD6
red	366162_REACTOME_Antigen_processing__Ubiquitination_&_Proteasome_degradation__Reactome_NCBI_Biosystems	PW_Lists	0.0229	29	ANAPC1, ASB3, ASB6, CDC16, CDC20, CUL1, CUL2, FBXO2, HECTD3, LRRC41, PSMA5, PSMA6, PSMA7, PSMB1, PSMB4, PSMB5, PSMB7, PSMC3, PSMC4, PSMD10, PSMD12, PSMD13, PSMD14, PSMD2, PSMD3, PSMD6, TPP2, UBA2, UBE3C
red	106243_REACTOME_Cooperation_of_Prefoldin_and_TriCCCT__in_actin_and_tubulin_folding__Reactome_NCBI_Biosystems	PW_Lists	0.0288	10	CCT2, CCT3, CCT4, CCT5, CCT6A, CCT7, TCP1, TUBB2A, TUBB2B, TUBB4B
red	106242_REACTOME_Chaperonin-mediated_protein_folding__Reactome_NCBI_Biosystems	PW_Lists	0.0354	13	CCT2, CCT3, CCT4, CCT5, CCT6A, CCT7, FBXW9, KIFC3, LONP2, TCP1, TUBB2A, TUBB2B, TUBB4B
turquoise	106572_REACTOME_Transmembrane_transport_of_small_molecules__Reactome_NCBI_Biosystems	PW_Lists	8.02e-17	104	ABCA2, ABCA3, ABCB8, ABCC1, ABCC10, ABCC5, ABCC8, ABCG1, ABCG4, ADCY2, ADCY8, ATP11B, ATP1A1, ATP1A3, ATP1B1, ATP2B1, ATP2B2, ATP2B3, ATP2B4, ATP2C1, ATP2C2, ATP6V0A1, ATP6V0B, ATP8A1, ATP8A2, ATP9A, ATP9B, CP, DNAJC25, G6PC3, GABRA1, GABRA2, GABRA3, GABRA5, GABRB1, GABRB3, GABRG2, GLRA2, GLRB, HTR3A, MCOLN1, NUP107, NUP210, PEX3, SEH1L, SLC12A4, SLC12A5, SLC12A7, SLC13A5, SLC15A2, SLC15A4, SLC16…
turquoise	6107_kegg_lysosome_pad_121__Kegg_NCBI_Biosystems	PW_Lists	2.01e-15	54	ABCA2, ABCB9, ACP2, AP4S1, ARSA, ASAH1, ATP6AP1, ATP6V0A1, ATP6V0B, CD68, CLN3, CLN5, CTNS, CTSA, CTSB, CTSC, CTSF, CTSK, CTSS, CTSZ, FUCA1, GAA, GALNS, GBA, GLA, GLB1, GM2A, GNPTAB, GNPTG, GNS, HEXA, HGSNAT, IGF2R, LAPTM4A, LGMN, LIPA, M6PR, MAN2B1, MANBA, MCOLN1, NAGA, NAGLU, NEU1, NPC2, PLA2G15, PPT1, PPT2, PSAP, SCARB2, SLC17A5, SMPD1, SORT1, SUMF1, TPP1
turquoise	96865_KEGG_Lysosome__Kegg_NCBI_Biosystems	PW_Lists	2.01e-15	54	ABCA2, ABCB9, ACP2, AP4S1, ARSA, ASAH1, ATP6AP1, ATP6V0A1, ATP6V0B, CD68, CLN3, CLN5, CTNS, CTSA, CTSB, CTSC, CTSF, CTSK, CTSS, CTSZ, FUCA1, GAA, GALNS, GBA, GLA, GLB1, GM2A, GNPTAB, GNPTG, GNS, HEXA, HGSNAT, IGF2R, LAPTM4A, LGMN, LIPA, M6PR, MAN2B1, MANBA, MCOLN1, NAGA, NAGLU, NEU1, NPC2, PLA2G15, PPT1, PPT2, PSAP, SCARB2, SLC17A5, SMPD1, SORT1, SUMF1, TPP1
turquoise	99052_KEGG_Lysosome__Kegg_NCBI_Biosystems	PW_Lists	2.01e-15	54	ABCA2, ABCB9, ACP2, AP4S1, ARSA, ASAH1, ATP6AP1, ATP6V0A1, ATP6V0B, CD68, CLN3, CLN5, CTNS, CTSA, CTSB, CTSC, CTSF, CTSK, CTSS, CTSZ, FUCA1, GAA, GALNS, GBA, GLA, GLB1, GM2A, GNPTAB, GNPTG, GNS, HEXA, HGSNAT, IGF2R, LAPTM4A, LGMN, LIPA, M6PR, MAN2B1, MANBA, MCOLN1, NAGA, NAGLU, NEU1, NPC2, PLA2G15, PPT1, PPT2, PSAP, SCARB2, SLC17A5, SMPD1, SORT1, SUMF1, TPP1
turquoise	161012_REACTOME_Post-translational_protein_modification__Reactome_NCBI_Biosystems	PW_Lists	7.37e-14	61	ALG1, ALG12, ALG2, ALG5, ALG6, ALG8, ALG9, B4GALT4, B4GALT5, C1GALT1C1, CALR, CANX, DAD1, DOHH, DOLK, DPAGT1, EDEM1, EDEM2, EDEM3, FURIN, FUT8, GALNT1, GALNT11, GALNT14, GALNT9, GALNTL6, GANAB, GAS6, GPAA1, LMAN1, MAN1B1, MAN2A1, MAN2A2, MCFD2, MGAT2, MGAT4B, MGAT4C, MGAT5, MLEC, MOGS, PDIA3, PGAP1, PIGC, PIGG, PIGH, PIGK, PIGO, PIGT, PIGU, PIGX, RFT1, RPN1, RPN2, SAR1B, ST3GAL3, STT3A, TUSC3, UG…
turquoise	22578497_synaptic_transcriptome_2338__PMID_22578497_Cajigas_2012	PW_Lists	3.85e-12	412	ABCA3, ABCC8, ABHD12, ABHD16A, ABHD2, ACVR2A, ADAM10, ADAM11, ADAM23, ALG2, ALG6, ALG8, ANGEL1, ANKRA2, ANKRD42, APP, ARL6IP1, ARL6IP5, ARMCX1, ASPHD2, ATL1, ATP13A1, ATP1A1, ATP1A3, ATP1B1, ATP2B1, ATP2B2, ATP2B3, ATP2B4, ATP6AP1, ATP6AP2, ATP6V0A1, ATP9B, B3GALNT1, B3GALT2, B4GALNT4, B4GALT5, BBS5, BDNF, BSCL2, BTBD6, C2CD2L, CACNA1A, CACNA1B, CACNA1C, CACNA1G, CACNA1H, CACNA1I, CACNA2D1, CACNA…
turquoise	462_KEGG_Neuroactive_ligand-receptor_interaction__Kegg_NCBI_Biosystems	PW_Lists	4.3e-12	58	ADCYAP1R1, ADORA2B, ADRA1B, ADRA1D, ADRB1, CCKBR, CHRM1, CHRM3, CHRM4, CHRNA5, CHRNB2, DRD5, GABBR1, GABBR2, GABRA1, GABRA2, GABRA3, GABRA5, GABRB1, GABRB3, GABRD, GABRG2, GLP2R, GLRA2, GLRB, GRIA1, GRIA3, GRIA4, GRID1, GRIK1, GRIK2, GRIK4, GRIK5, GRIN1, GRIN2B, GRM2, GRM5, GRM7, GRM8, HCRTR1, HTR1A, HTR1F, HTR5A, HTR6, MAS1, MC4R, MCHR1, NPY1R, NPY2R, NPY5R, NTSR1, OPRL1, P2RX4, PTH1R, SSTR2, SS…
turquoise	83053_KEGG_Neuroactive_ligand-receptor_interaction__Kegg_NCBI_Biosystems	PW_Lists	4.3e-12	58	ADCYAP1R1, ADORA2B, ADRA1B, ADRA1D, ADRB1, CCKBR, CHRM1, CHRM3, CHRM4, CHRNA5, CHRNB2, DRD5, GABBR1, GABBR2, GABRA1, GABRA2, GABRA3, GABRA5, GABRB1, GABRB3, GABRD, GABRG2, GLP2R, GLRA2, GLRB, GRIA1, GRIA3, GRIA4, GRID1, GRIK1, GRIK2, GRIK4, GRIK5, GRIN1, GRIN2B, GRM2, GRM5, GRM7, GRM8, HCRTR1, HTR1A, HTR1F, HTR5A, HTR6, MAS1, MC4R, MCHR1, NPY1R, NPY2R, NPY5R, NTSR1, OPRL1, P2RX4, PTH1R, SSTR2, SS…
turquoise	119558_REACTOME_SLC-mediated_transmembrane_transport__Reactome_NCBI_Biosystems	PW_Lists	4.84e-09	63	CP, G6PC3, NUP107, NUP210, SEH1L, SLC12A4, SLC12A5, SLC12A7, SLC13A5, SLC15A2, SLC15A4, SLC16A3, SLC17A5, SLC17A7, SLC17A8, SLC1A1, SLC1A4, SLC1A6, SLC20A1, SLC22A5, SLC24A2, SLC24A3, SLC27A4, SLC2A1, SLC2A3, SLC2A6, SLC2A8, SLC30A3, SLC30A5, SLC30A6, SLC30A7, SLC33A1, SLC35A1, SLC35A2, SLC35A3, SLC35B2, SLC35B4, SLC37A4, SLC39A1, SLC39A10, SLC39A14, SLC39A3, SLC39A6, SLC3A2, SLC4A10, SLC4A7, SLC…
turquoise	161013_REACTOME_Asparagine_N-linked_glycosylation__Reactome_NCBI_Biosystems	PW_Lists	1.27e-08	39	ALG1, ALG12, ALG2, ALG5, ALG6, ALG8, ALG9, B4GALT4, B4GALT5, CALR, CANX, DAD1, DOLK, DPAGT1, EDEM1, EDEM2, EDEM3, FUT8, GANAB, LMAN1, MAN1B1, MAN2A1, MAN2A2, MCFD2, MGAT2, MGAT4B, MGAT4C, MGAT5, MLEC, MOGS, PDIA3, RFT1, RPN1, RPN2, SAR1B, STT3A, TUSC3, UGGT1, UGGT2
turquoise	167190_KEGG_Protein_processing_in_endoplasmic_reticulum__Kegg_NCBI_Biosystems	PW_Lists	3.12e-08	56	AMFR, BCAP31, CALR, CANX, DAD1, DERL1, DERL2, DNAJB11, DNAJB12, DNAJC1, DNAJC10, DNAJC3, EDEM1, EDEM2, EDEM3, EIF2AK3, ERLEC1, ERO1LB, ERP29, FBXO6, GANAB, HERPUD1, HSP90B1, HSPA5, HYOU1, LMAN1, MAN1B1, MARCH6, MBTPS1, MBTPS2, MOGS, OS9, P4HB, PDIA3, PDIA4, RPN1, RPN2, RRBP1, SAR1B, SEC62, SEC63, SEL1L, SIL1, SSR1, SSR2, SSR3, SSR4, STT3A, STT3B, SYVN1, TUSC3, TXNDC5, UBE2J2, UGGT1, UGGT2, WFS1
turquoise	167325_KEGG_Protein_processing_in_endoplasmic_reticulum__Kegg_NCBI_Biosystems	PW_Lists	3.12e-08	56	AMFR, BCAP31, CALR, CANX, DAD1, DERL1, DERL2, DNAJB11, DNAJB12, DNAJC1, DNAJC10, DNAJC3, EDEM1, EDEM2, EDEM3, EIF2AK3, ERLEC1, ERO1LB, ERP29, FBXO6, GANAB, HERPUD1, HSP90B1, HSPA5, HYOU1, LMAN1, MAN1B1, MARCH6, MBTPS1, MBTPS2, MOGS, OS9, P4HB, PDIA3, PDIA4, RPN1, RPN2, RRBP1, SAR1B, SEC62, SEC63, SEL1L, SIL1, SSR1, SSR2, SSR3, SSR4, STT3A, STT3B, SYVN1, TUSC3, TXNDC5, UBE2J2, UGGT1, UGGT2, WFS1
turquoise	161020_REACTOME_GPCR_ligand_binding__Reactome_NCBI_Biosystems	PW_Lists	6.84e-07	58	ADCYAP1R1, ADORA2B, ADRA1B, ADRA1D, ADRB1, APP, CALCA, CCK, CCKBR, CD55, CHRM1, CHRM3, CHRM4, CX3CL1, CXCL12, CXCR4, DNAJC25, DRD5, FZD9, GABBR1, GABBR2, GLP2R, GPR17, GPR68, GRM2, GRM5, GRM7, GRM8, GRP, HCRTR1, HTR1A, HTR1F, HTR5A, HTR6, MC4R, MCHR1, NMB, NPSR1, NPY, NPY1R, NPY2R, NPY5R, NTSR1, OPRL1, PNOC, PTH1R, QRFPR, RAMP1, SST, SSTR2, SSTR3, VIP, VIPR1, WNT2, WNT4, WNT5A, WNT6, WNT7B
turquoise	187193_REACTOME_Ion_channel_transport__Reactome_NCBI_Biosystems	PW_Lists	1.27e-06	24	ATP11B, ATP1A1, ATP1A3, ATP1B1, ATP2B1, ATP2B2, ATP2B3, ATP2B4, ATP2C1, ATP2C2, ATP8A1, ATP8A2, ATP9A, ATP9B, GABRA1, GABRA2, GABRA3, GABRA5, GABRB1, GABRB3, GABRG2, GLRA2, GLRB, HTR3A
turquoise	345_KEGG_N-Glycan_biosynthesis__Kegg_NCBI_Biosystems	PW_Lists	2.26e-06	26	ALG1, ALG12, ALG2, ALG5, ALG6, ALG8, ALG9, DAD1, DOLK, DPAGT1, FUT8, GANAB, MAN1B1, MAN2A1, MAN2A2, MGAT2, MGAT4B, MGAT4C, MGAT5, MOGS, RFT1, RPN1, RPN2, STT3A, STT3B, TUSC3
turquoise	82975_KEGG_N-Glycan_biosynthesis__Kegg_NCBI_Biosystems	PW_Lists	2.26e-06	26	ALG1, ALG12, ALG2, ALG5, ALG6, ALG8, ALG9, DAD1, DOLK, DPAGT1, FUT8, GANAB, MAN1B1, MAN2A1, MAN2A2, MGAT2, MGAT4B, MGAT4C, MGAT5, MOGS, RFT1, RPN1, RPN2, STT3A, STT3B, TUSC3
turquoise	480_KEGG_Cell_adhesion_molecules_(CAMs)__Kegg_NCBI_Biosystems	PW_Lists	4.2e-06	29	CADM3, CD34, CDH2, CLDN5, CNTN1, CNTNAP1, CNTNAP2, GLG1, ITGA6, ITGAV, ITGB8, L1CAM, MAG, MPZL1, NCAM1, NCAM2, NEO1, NFASC, NLGN1, NLGN2, NLGN3, NRCAM, NRXN1, NRXN2, NRXN3, OCLN, PTPRM, SDC3, VCAN
turquoise	83069_KEGG_Cell_adhesion_molecules_(CAMs)__Kegg_NCBI_Biosystems	PW_Lists	4.2e-06	29	CADM3, CD34, CDH2, CLDN5, CNTN1, CNTNAP1, CNTNAP2, GLG1, ITGA6, ITGAV, ITGB8, L1CAM, MAG, MPZL1, NCAM1, NCAM2, NEO1, NFASC, NLGN1, NLGN2, NLGN3, NRCAM, NRXN1, NRXN2, NRXN3, OCLN, PTPRM, SDC3, VCAN
turquoise	187217_REACTOME_N-glycan_trimming_in_the_ER_and_CalnexinCalreticulin_cycle__Reactome_NCBI_Biosystems	PW_Lists	6.49e-05	12	CALR, CANX, EDEM1, EDEM2, EDEM3, GANAB, MAN1B1, MLEC, MOGS, PDIA3, UGGT1, UGGT2
turquoise	119559_REACTOME_Transport_of_inorganic_cationsanions_and_amino_acidsoligopeptides__Reactome_NCBI_Biosystems	PW_Lists	0.000135	29	SLC12A4, SLC12A5, SLC12A7, SLC15A2, SLC15A4, SLC17A5, SLC17A7, SLC17A8, SLC1A1, SLC1A4, SLC1A6, SLC20A1, SLC24A2, SLC24A3, SLC3A2, SLC4A10, SLC4A7, SLC6A15, SLC7A1, SLC7A3, SLC7A5, SLC7A8, SLC8A2, SLC9A1, SLC9A2, SLC9A5, SLC9A6, SLC9A8, SLC9A9
turquoise	106230_REACTOME_Metabolism_of_proteins__Reactome_NCBI_Biosystems	PW_Lists	0.000563	82	ALG1, ALG12, ALG2, ALG5, ALG6, ALG8, ALG9, B4GALT4, B4GALT5, C1GALT1C1, CALR, CANX, DAD1, DOHH, DOLK, DPAGT1, EDEM1, EDEM2, EDEM3, FBXO6, FBXW2, FBXW7, FKBP9, FURIN, FUT8, GALNT1, GALNT11, GALNT14, GALNT9, GALNTL6, GANAB, GAS6, GPAA1, LMAN1, MAN1B1, MAN2A1, MAN2A2, MCFD2, MGAT2, MGAT4B, MGAT4C, MGAT5, MLEC, MOGS, PDIA3, PGAP1, PIGC, PIGG, PIGH, PIGK, PIGO, PIGT, PIGU, PIGX, RFT1, RPL11, RPL18, RP…
turquoise	476_KEGG_Axon_guidance__Kegg_NCBI_Biosystems	PW_Lists	0.00179	40	CXCL12, CXCR4, EFNA1, EFNA2, EPHA3, EPHA4, EPHA5, EPHA7, EPHA8, EPHB1, EPHB2, EPHB3, EPHB6, L1CAM, LRRC4C, MET, NRP1, NTNG1, PLXNA1, PLXNA2, PLXNB2, PLXNC1, ROBO1, ROBO2, SEMA3C, SEMA3E, SEMA3F, SEMA4A, SEMA4B, SEMA4C, SEMA4D, SEMA4F, SEMA6B, SEMA6C, SEMA7A, SLIT1, SLIT2, SLIT3, UNC5A, UNC5C
turquoise	83065_KEGG_Axon_guidance__Kegg_NCBI_Biosystems	PW_Lists	0.00179	40	CXCL12, CXCR4, EFNA1, EFNA2, EPHA3, EPHA4, EPHA5, EPHA7, EPHA8, EPHB1, EPHB2, EPHB3, EPHB6, L1CAM, LRRC4C, MET, NRP1, NTNG1, PLXNA1, PLXNA2, PLXNB2, PLXNC1, ROBO1, ROBO2, SEMA3C, SEMA3E, SEMA3F, SEMA4A, SEMA4B, SEMA4C, SEMA4D, SEMA4F, SEMA6B, SEMA6C, SEMA7A, SLIT1, SLIT2, SLIT3, UNC5A, UNC5C
turquoise	198886_WikiPathways_GPCRs,_Class_A_Rhodopsin-like__Wiki_Pathways_NCBI_Biosystems	PW_Lists	0.00203	33	ADORA2B, ADRA1B, ADRA1D, ADRB1, CCKBR, CHRM1, CHRM3, CHRM4, CXCR4, DRD5, GPR161, GPR17, GPR19, GPR22, GPR37, GPR45, GPR68, GPR75, HCRTR1, HTR1A, HTR1F, HTR5A, HTR6, MAS1, MC4R, MCHR1, NPY1R, NPY2R, NPY5R, NTSR1, OPRL1, SSTR2, SSTR3
turquoise	187218_REACTOME_Calnexincalreticulin_cycle__Reactome_NCBI_Biosystems	PW_Lists	0.00308	10	CALR, CANX, EDEM1, EDEM2, EDEM3, GANAB, MAN1B1, PDIA3, UGGT1, UGGT2
turquoise	106357_REACTOME_Class_A1_(Rhodopsin-like_receptors)__Reactome_NCBI_Biosystems	PW_Lists	0.00346	37	ADORA2B, ADRA1B, ADRA1D, ADRB1, APP, CCK, CCKBR, CHRM1, CHRM3, CHRM4, CX3CL1, CXCL12, CXCR4, DRD5, GPR17, GPR68, GRP, HCRTR1, HTR1A, HTR1F, HTR5A, HTR6, MC4R, MCHR1, NMB, NPSR1, NPY, NPY1R, NPY2R, NPY5R, NTSR1, OPRL1, PNOC, QRFPR, SST, SSTR2, SSTR3
turquoise	436_KEGG_ABC_transporters__Kegg_NCBI_Biosystems	PW_Lists	0.0477	15	ABCA2, ABCA3, ABCA5, ABCB4, ABCB8, ABCB9, ABCC1, ABCC10, ABCC5, ABCC8, ABCD4, ABCG1, ABCG4, TAP1, TAP2
turquoise	83035_KEGG_ABC_transporters__Kegg_NCBI_Biosystems	PW_Lists	0.0477	15	ABCA2, ABCA3, ABCA5, ABCB4, ABCB8, ABCB9, ABCC1, ABCC10, ABCC5, ABCC8, ABCD4, ABCG1, ABCG4, TAP1, TAP2
yellow	6012_postsynaptic_proteomics_pad_1097__Palazzolo_and_Wang	PW_Lists	2.03e-20	175	ABCD3, ACACA, ACO2, ACTR2, AGK, ALDOC, AMPH, AP1B1, AP2A1, AP2A2, AP2M1, AP3B2, AP3D1, AP3M2, APPL1, ARF4, ARHGEF2, ARPC2, ATG16L1, ATP5A1, ATP5B, ATP6V1B2, ATP6V1C1, ATP6V1E1, BAZ1B, BIN1, BIRC6, CALB2, CAMK2A, CAMK2B, CAMKV, CAPZA2, CASK, CDC42BPB, CKAP5, CKB, CLASP2, CLIP1, CLMN, CNP, CORO1B, CORO1C, CRMP1, CSNK1A1, CSNK2A1, CTNNB1, CTTN, DBN1, DCTN1, DDX3X, DDX5, DLGAP1, DMXL2, DNAJA2, DNAJC1…
yellow	6011_postsynaptic_density_pad_1054__Palazzolo_and_Wang	PW_Lists	3.86e-20	170	ABCD3, ACACA, ACO2, ACTR2, AGK, ALDOC, AMPH, AP1B1, AP2A1, AP2A2, AP2M1, AP3B2, AP3D1, AP3M2, ARF4, ARHGEF2, ARPC2, ATP5A1, ATP5B, ATP6V1B2, ATP6V1C1, ATP6V1E1, BAZ1B, BIN1, BIRC6, CAMK2A, CAMK2B, CAMKV, CAPZA2, CASK, CDC42BPB, CKAP5, CKB, CLASP2, CLIP1, CLMN, CNP, CORO1B, CORO1C, CRMP1, CSNK1A1, CSNK2A1, CTNNB1, CTTN, DBN1, DCTN1, DDX3X, DDX5, DLGAP1, DMXL2, DNAJA2, DNAJC11, DNM1, DNM2, DYNC1I1,…
yellow	6001_synapsedb_pad_3552__Palazzolo_and_Wang	PW_Lists	3.53e-17	348	ABCD3, ACACA, ACO2, ACOT7, ACSL1, ACTB, ACTR2, AGK, AKAP10, ALDH1B1, ALDH3A2, ALDOC, AMPH, ANKFY1, ANXA6, AP1B1, AP1M1, AP2A1, AP2A2, AP2M1, AP3B1, AP3B2, AP3D1, AP3M2, AP3S2, APEX2, APPL1, ARCN1, ARF1, ARF4, ARHGEF1, ARHGEF11, ARHGEF2, ARPC2, ATF6B, ATG16L1, ATP5A1, ATP5B, ATP6V1B2, ATP6V1C1, ATP6V1E1, BAZ1B, BCAT2, BIN1, BIRC6, CABIN1, CALB2, CAMK2A, CAMK2B, CAMKK1, CAMKV, CAPN1, CAPZA2, CASK, …
yellow	6003_presynaptic_hippocampus_pad_149__Palazzolo_and_Wang	PW_Lists	1.68e-16	50	ACO2, ACTB, ANXA6, AP1B1, AP2A1, AP2A2, ARPC2, ATP5A1, ATP5B, ATP6V1B2, ATP6V1C1, ATP6V1E1, CKB, CNP, DNM1, EEF2, ENO2, EXOC4, GNA13, GPHN, HADHB, HK1, HSP90AB1, KCNAB2, LRRC47, MAPK8IP2, MAPK8IP3, NDUFA10, NSF, OPA1, PDHA1, PDHB, PFKM, PPP2R1A, PPP3CA, PPP3CB, PRKCA, PRKCG, SEPT7, SLC25A12, SNAP25, STXBP1, SYNJ1, TUBA1C, TUBA4A, TUBB3, TUBB4A, TUFM, VDAC1, YWHAE
yellow	23_HD_Yang_cortex_569__Yang	PW_Lists	2.66e-14	104	AARS, ACADSB, ACSL1, ACTB, AK5, AMPH, AP1B1, AP2A1, AP2A2, AP2M1, AP3B2, ARF1, ARHGEF2, ATP5A1, ATP5B, ATP6V1B2, ATP6V1C1, ATP6V1E1, BIN1, CAMK2A, CAMK2B, CAPZA2, CKB, CNP, CPNE8, CRMP1, CSNK2A1, CSNK2A2, CTNNB1, DBN1, DCTN1, DDX5, DHRS1, DNAJA2, DNM1, DNM2, EEF1A2, EEF2, EIF3A, ENO1, ERC1, GNA13, GNAL, GNB2, GOT2, HK1, HNRNPH1, HNRNPK, HSP90AB1, HSPA9, HSPD1, ITPKA, KCNAB2, KIF2A, LANCL1, LDHA, …
yellow	22578497_synaptic_transcriptome_2338__PMID_22578497_Cajigas_2012	PW_Lists	1.06e-11	264	AARS, ACO2, ACOT7, ACTB, ACTR2, AHCY, AMBRA1, AMPH, ANAPC2, ANKFY1, ANXA11, AP1B1, AP2A2, AP3B1, AP3D1, AP3M2, ARCN1, ARF1, ARHGAP21, ARHGAP39, ARHGEF1, ARHGEF2, ARPC2, ASCC3, ATG16L1, ATG2A, ATG7, ATG9A, ATP5B, ATP6V1B2, ATP6V1C1, BBS9, BLMH, BOP1, BRD1, BTBD9, CABIN1, CALB1, CAMK2A, CAMK2B, CAMKK1, CAMKV, CAPZA2, CDC37, CLEC16A, CLK2, CNOT1, CNOT2, COG1, COPG1, COPS6, COPS8, CPNE4, CPSF1, CPSF2…
yellow	6008_synapse_clathrin_coat_pad_149__Palazzolo_and_Wang	PW_Lists	4.3e-10	43	ACACA, ACO2, ALDOC, AMPH, AP1B1, AP2A2, ATP5A1, ATP5B, BIN1, CAMK2A, CAMK2B, CKB, CNP, CRMP1, DLGAP1, DNM1, DNM2, ENO1, ENO2, GDI1, GNB2, GOT2, HK1, HSP90AB1, HSPA9, HSPD1, LDHA, LDHB, NAPA, NCKAP1, PDHA1, PDHB, PFKM, PFKP, PGAM1, PYGB, RAB3A, SNAP25, STX1A, SYNJ1, TAGLN3, TPI1, VDAC1
yellow	198814_WikiPathways_Glycolysis_and_Gluconeogenesis__Wiki_Pathways_NCBI_Biosystems	PW_Lists	1.12e-07	18	ALDOC, ENO1, ENO2, GOT1, GOT2, HK1, HK2, HK3, LDHA, LDHB, MDH1, PDHA1, PDHB, PDHX, PFKM, PFKP, PGAM1, TPI1
yellow	6201_mito_db_pad_2664__Palazzolo_and_Wang	PW_Lists	1.46e-07	228	AARS, AASDHPPT, ABCD3, ABCE1, ABCF2, ACACA, ACADSB, ACO2, ACOT7, ACOT9, ACOX1, ACSF3, ACSL1, ACTB, ADSL, AGK, AKAP10, ALDH1B1, ALDH3A2, ALDOC, ANXA6, APEX2, ASS1, ATP5A1, ATP5B, ATP6V1B2, ATP6V1C1, ATP6V1E1, BCAT2, BIN1, BIRC6, BUB3, CAMK2A, CAPN1, CASP6, CBS, CENPC1, CEP89, CKB, CLMN, CNP, COASY, COPS6, CORO1C, CPNE4, CSNK1A1, CSNK2A1, CUL7, DAP3, DBN1, DCAF11, DCTN1, DDX19A, DGKG, DHRS1, DHX30,…
yellow	477135_REACTOME_Metabolism__Reactome_NCBI_Biosystems	PW_Lists	6.72e-07	124	AASDHPPT, ACACA, ACADSB, ACO2, ACOX1, ACSL1, ADSL, ADSSL1, AHCY, AK5, ALDOC, AMPD2, ASS1, ATIC, ATP5A1, ATP5B, BCAT2, CBS, CKB, CNDP2, COASY, CSAD, CTNNB1, DDC, DNM2, ENO1, ENO2, ENOPH1, ETFDH, FECH, FLAD1, GART, GBA2, GCDH, GLS, GNB2, GOT1, GOT2, GPHN, GSTM4, GYS1, HADHA, HADHB, HDC, HK1, HK2, HK3, HMBS, HMGCS1, IVD, LDHA, LDHB, LSS, MCCC1, MDH1, ME1, MED16, MED18, MGLL, MTAP, MTR, NAMPT, NCOR1,…
yellow	6004_presynaptic_striatum_pad_126__Palazzolo_and_Wang	PW_Lists	1.07e-06	33	ACTB, AP2A2, AP2M1, ATP5A1, ATP5B, ATP6V1B2, ATP6V1E1, CKB, DNM1, DNM2, DPP3, DYNC1LI1, HK1, NAPA, NDUFA10, NDUFS2, NSF, OGDH, OPA1, PFKP, PPP3CA, PPP3CB, PRPS1, SEPT7, STX1A, STXBP1, TPI1, TUBA1C, TUBA4A, TUBB3, UQCRC1, VDAC1, YWHAH
yellow	106199_REACTOME_Glucose_metabolism__Reactome_NCBI_Biosystems	PW_Lists	3.02e-06	21	ALDOC, ENO1, ENO2, GOT1, GOT2, GYS1, MDH1, PCK2, PFKM, PFKP, PGAM1, PGM2, PHKB, PHKG2, PPP2R1A, PPP2R1B, PYGB, PYGM, SLC25A10, SLC25A12, TPI1
yellow	106196_REACTOME_Metabolism_of_carbohydrates__Reactome_NCBI_Biosystems	PW_Lists	3.03e-05	29	ALDOC, ENO1, ENO2, GOT1, GOT2, GYS1, HK1, HK2, HK3, MDH1, NUP133, NUP160, NUP214, PCK2, PFKM, PFKP, PGAM1, PGM2, PHKB, PHKG2, PPP2R1A, PPP2R1B, PRPS1, PRPS2, PYGB, PYGM, SLC25A10, SLC25A12, TPI1
yellow	6006_presynapse_brain_pad_59__Palazzolo_and_Wang	PW_Lists	6.16e-05	21	ACTB, ALDOC, AP2M1, ARF1, ATP6V1B2, ATP6V1C1, ATP6V1E1, CAMK2A, DNM1, ENO1, GNB2, LDHA, NSF, RAB1B, RAB3A, RAC1, SEPT7, STXBP1, TUBA4A, VDAC1, YWHAE
yellow	6010_postsynaptic_nmda_masc_nrc_pad_184__Palazzolo_and_Wang	PW_Lists	6.52e-05	40	ACO2, ALDOC, APPL1, ARPC2, ATG16L1, ATP5A1, CALB2, CAMK2A, CAMK2B, CAPZA2, CTNNB1, CTTN, DBN1, DLGAP1, DNM1, GNB2, GOT2, LDHA, LDHB, MAP2K1, MAPK10, MPP3, NSF, PPP2R1A, PPP3CA, PRKCG, PTK2B, RAB3A, RAC1, RAF1, SLC25A12, SLC25A22, SNAP25, STX1A, STXBP1, TPI1, TUBA1A, VDAC1, YWHAE, YWHAH
yellow	287_KEGG_Glycolysis__Gluconeogenesis__Kegg_NCBI_Biosystems	PW_Lists	0.000135	18	ALDH1B1, ALDH3A2, ALDOC, ENO1, ENO2, HK1, HK2, HK3, LDHA, LDHB, PCK2, PDHA1, PDHB, PFKM, PFKP, PGAM1, PGM2, TPI1
yellow	82926_KEGG_Glycolysis__Gluconeogenesis__Kegg_NCBI_Biosystems	PW_Lists	0.000135	18	ALDH1B1, ALDH3A2, ALDOC, ENO1, ENO2, HK1, HK2, HK3, LDHA, LDHB, PCK2, PDHA1, PDHB, PFKM, PFKP, PGAM1, PGM2, TPI1
yellow	132956_KEGG_Metabolic_pathways__Kegg_NCBI_Biosystems	PW_Lists	0.000185	115	ACACA, ACADSB, ACO2, ACOX1, ACSL1, ADSL, ADSSL1, AGK, AHCY, AK5, ALDH1A2, ALDH1B1, ALDH3A2, ALDOC, AMPD2, ASS1, ATIC, ATP5A1, ATP5B, ATP6V1B2, ATP6V1C1, ATP6V1E1, BCAT2, CBS, CKB, CNDP2, COASY, CSAD, DDC, DGKG, DNMT1, EARS2, ENO1, ENO2, FECH, FLAD1, FUK, GART, GCDH, GFPT1, GFPT2, GLS, GNE, GOT1, GOT2, HADHA, HADHB, HDC, HK1, HK2, HK3, HMBS, HMGCS1, ISYNA1, ITPKA, ITPKB, IVD, LDHA, LDHB, LSS, MCCC…
yellow	6002_synapsedb_internet_2488__Palazzolo_and_Wang	PW_Lists	0.000392	216	ACACA, ACOT7, ACSL1, AKAP10, ALDH1B1, ALDH3A2, AMPH, ANKFY1, AP1B1, AP1M1, AP2A1, AP2A2, AP2M1, AP3B1, AP3B2, AP3D1, AP3M2, AP3S2, APEX2, APPL1, ARCN1, ARHGEF11, ARHGEF2, ATF6B, ATP5A1, ATP5B, BCAT2, BIN1, CAMK2A, CAMK2B, CAMKK1, CAPN1, CASK, CDC42, CLASP2, COG1, COPS2, COPS4, COPS6, COPS7A, COPS8, COPZ1, CSNK1A1, CSNK1D, CSNK2A1, CSNK2A2, CUL7, DBN1, DCPS, DCTN1, DDC, DIAPH1, DLGAP1, DNM1, DNM1L…
yellow	22556411_tanese_interactome_cytoplasm_329__PMID_22556411_Culver_2012	PW_Lists	0.000496	56	ACTB, ACTR2, AP2A1, ARHGAP39, ARPC2, ATP5A1, CAMK2B, CAPZA2, CC2D1A, CLASP2, CNP, CORO1B, CORO1C, DBN1, DCTN1, DDX5, DHX29, DNAJA2, DNM1, FXR2, GDI2, GNB2, GTF2I, HADHA, HNRNPH1, HNRNPK, HNRNPUL1, HSPA9, KNDC1, LIMA1, MAP3K12, MYO1C, MYO1E, MYO6, NAP1L4, NSF, PDHA1, PFKM, PIP4K2C, PRMT5, RAB14, SBF1, SEPT7, SERBP1, SNAP25, SRPK1, STRAP, STXBP1, TMOD1, TUBB4A, TUBB6, TUFM, TWF1, VDAC1, WDR1, WDR47
yellow	6005_presynaptic_forebrain_pad_95__Palazzolo_and_Wang	PW_Lists	0.00141	25	ACTB, AP2M1, ATP5A1, ATP5B, ATP6V1B2, ATP6V1E1, CAMK2A, CNP, CSNK2A1, CTNNB1, DNM1, EEF2, GNB2, KIF2A, NDUFA10, NSF, OGDHL, PFKM, SEPT7, STXBP1, TUBA1C, TUBA4A, TUBB3, TUBB4A, TUFM
yellow	124832_KEGG_Spliceosome__Kegg_NCBI_Biosystems	PW_Lists	0.00481	29	AQR, CDC40, CDC5L, CTNNBL1, DDX39B, DDX42, DDX5, DHX16, DHX38, DHX8, EFTUD2, EIF4A3, HNRNPK, HNRNPM, NCBP1, PRPF19, PRPF8, SART1, SF3A2, SF3B3, SF3B4, SNRNP200, SNRPB, SNW1, THOC1, U2SURP, USP39, WBP11, XAB2
yellow	125136_KEGG_Spliceosome__Kegg_NCBI_Biosystems	PW_Lists	0.00481	29	AQR, CDC40, CDC5L, CTNNBL1, DDX39B, DDX42, DDX5, DHX16, DHX38, DHX8, EFTUD2, EIF4A3, HNRNPK, HNRNPM, NCBP1, PRPF19, PRPF8, SART1, SF3A2, SF3B3, SF3B4, SNRNP200, SNRPB, SNW1, THOC1, U2SURP, USP39, WBP11, XAB2
yellow	516_KEGG_Pathogenic_Escherichia_coli_infection__Kegg_NCBI_Biosystems	PW_Lists	0.00885	16	ACTB, ARHGEF2, ARPC2, CDC42, CTNNB1, CTTN, EZR, FYN, PRKCA, RHOA, TUBA1A, TUBA1C, TUBA4A, TUBB3, TUBB4A, TUBB6
yellow	83103_KEGG_Pathogenic_Escherichia_coli_infection__Kegg_NCBI_Biosystems	PW_Lists	0.00885	16	ACTB, ARHGEF2, ARPC2, CDC42, CTNNB1, CTTN, EZR, FYN, PRKCA, RHOA, TUBA1A, TUBA1C, TUBA4A, TUBB3, TUBB4A, TUBB6
yellow	105765_REACTOME_Cell_Cycle,_Mitotic__Reactome_NCBI_Biosystems	PW_Lists	0.0097	50	AHCTF1, ANAPC2, BTRC, BUB3, CCND3, CDC23, CDK11B, CDK7, CENPC1, CEP76, CKAP5, CLASP2, CLIP1, CSNK1D, DCTN1, FZR1, GORASP1, KIF2A, MCM4, NUP133, NUP160, ODF2, ORC2, PCM1, PCNT, POLD1, POLD3, PPP2R1A, PPP2R1B, PPP2R2A, PPP2R5A, PPP2R5E, PSMB8, PSMC1, PSMD11, PSMD5, PSMD7, RFC1, RPA2, SMC1A, STAG1, TFDP2, TUBA1A, TUBA4A, TUBB4A, TUBGCP3, TUBGCP4, TUBGCP5, YWHAE, ZWINT
yellow	103421_KEGG_Cysteine_and_methionine_metabolism__Kegg_NCBI_Biosystems	PW_Lists	0.0146	12	AHCY, CBS, DNMT1, ENOPH1, GOT1, GOT2, LDHA, LDHB, MTAP, MTR, SMS, SRM
yellow	104488_KEGG_Cysteine_and_methionine_metabolism__Kegg_NCBI_Biosystems	PW_Lists	0.0146	12	AHCY, CBS, DNMT1, ENOPH1, GOT1, GOT2, LDHA, LDHB, MTAP, MTR, SMS, SRM
yellow	6206_pad_mito_matrix_123__Palazzolo_and_Wang	PW_Lists	0.0151	26	ACADSB, ALDH1B1, EARS2, GCDH, GOT2, HARS2, HSPD1, IVD, LONP1, MCCC1, ME2, NDUFA10, OGDH, OGDHL, PARS2, PCCA, PCCB, PDHA1, PDHB, PDHX, PDK2, PDK3, PDP2, PMPCA, SARDH, TDRD7
yellow	106204_REACTOME_Gluconeogenesis__Reactome_NCBI_Biosystems	PW_Lists	0.0301	11	ALDOC, ENO1, ENO2, GOT1, GOT2, MDH1, PCK2, PGAM1, SLC25A10, SLC25A12, TPI1
yellow	413340_KEGG_Glycolysis_(Embden-Meyerhof_pathway),_glucose__pyruvate__Kegg_NCBI_Biosystems	PW_Lists	0.0305	10	ALDOC, ENO1, ENO2, HK1, HK2, HK3, PFKM, PFKP, PGAM1, TPI1
yellow	468194_KEGG_Glycolysis_(Embden-Meyerhof_pathway),_glucose__pyruvate__Kegg_NCBI_Biosystems	PW_Lists	0.0305	10	ALDOC, ENO1, ENO2, HK1, HK2, HK3, PFKM, PFKP, PGAM1, TPI1
yellow	373_KEGG_Pyruvate_metabolism__Kegg_NCBI_Biosystems	PW_Lists	0.0306	13	ACACA, ALDH1B1, ALDH3A2, GLO1, LDHA, LDHB, LDHD, MDH1, ME1, ME2, PCK2, PDHA1, PDHB
yellow	82998_KEGG_Pyruvate_metabolism__Kegg_NCBI_Biosystems	PW_Lists	0.0306	13	ACACA, ALDH1B1, ALDH3A2, GLO1, LDHA, LDHB, LDHD, MDH1, ME1, ME2, PCK2, PDHA1, PDHB
yellow	530733_REACTOME_Cell_Cycle__Reactome_NCBI_Biosystems	PW_Lists	0.043	54	AHCTF1, ANAPC2, BTRC, BUB3, CCND3, CDC23, CDK11B, CDK7, CENPC1, CEP76, CKAP5, CLASP2, CLIP1, CSNK1D, DCTN1, FZR1, GORASP1, KIF2A, MCM4, NUP133, NUP160, ODF2, ORC2, PCM1, PCNT, POLD1, POLD3, PPP2R1A, PPP2R1B, PPP2R2A, PPP2R5A, PPP2R5E, PSMB8, PSMC1, PSMD11, PSMD5, PSMD7, RAD1, RAD9A, RBBP7, RFC1, RPA2, RUVBL2, SMC1A, STAG1, TFDP2, TUBA1A, TUBA4A, TUBB4A, TUBGCP3, TUBGCP4, TUBGCP5, YWHAE, ZWINT

## Sheet: Immune Pathways
InputCategories	UserDefinedCategories	Type	CorrectedPvalues	NumGenes	CategoryGenes
blue	Vitamin D__ImmunePathway	Immune	0.00128	27	ARID1A, ARID1B, CDKN1A, CHAF1A, CREBBP, EP300, HDAC4, HDAC9, MAPK1, MAPK3, MED1, MEF2D, PIK3CB, PIK3R2, PIK3R3, PIK3R5, PLCG1, PRKACA, PRKACB, PRKCD, PRKCI, RASGRP1, RXRB, RXRG, SMARCC1, SMARCD3, SRC
blue	IL-1R1__ImmunePathway	Immune	0.00734	19	IKBKB, IKBKG, IRAK1, MAP2K7, MAP3K1, MAP3K3, MAPK1, MAPK14, MAPK3, MAPKAPK2, MYD88, PIK3R2, PLCG1, PTPN11, SQSTM1, TAB3, TOLLIP, TRAF6, UBE2N
blue	General chemokine pathways__ImmunePathway	Immune	0.00752	34	ADCY6, AKT3, ARRB1, CRKL, GNAI1, GNB1, GNB4, GNG7, IKBKB, IKBKG, JAK2, MAPK1, MAPK3, PAK1, PARD3, PIK3CB, PIK3R2, PIK3R3, PIK3R5, PREX1, PRKACA, PRKACB, PRKCD, RASGRP2, ROCK2, SHC3, SHC4, SOS2, STAT2, STAT3, STAT5B, TIAM1, TIAM2, VAV3
blue	IL-23__ImmunePathway	Immune	0.00913	14	ARAP3, IKBKB, IKBKG, JAK2, NFKB2, NFKBID, NFKBIZ, PDPK1, PIK3CB, PIK3R2, PIK3R3, STAT3, STAT5A, STAT5B
blue	IL-12__ImmunePathway	Immune	0.0104	19	EP300, ETV5, IKBKB, IL4, IRF8, JAK2, MAPK1, MAPK11, MAPK14, MAPK3, MYD88, NCOA1, NFKB2, PIK3CB, PIK3R2, PIK3R3, PIK3R5, STAT6, TRAF6
blue	IL-4 __ImmunePathway	Immune	0.0146	19	EP300, GAB2, IKBKB, IL4, IRS1, IRS2, JAK2, MAPK1, MAPK11, MAPK14, MAPK3, NFIL3, PIK3R2, PTPN11, PTPN6, STAT3, STAT5A, STAT5B, STAT6
blue	ICOS__ImmunePathway	Immune	0.0363	14	AKT3, ARAP3, GAB2, IKBKB, IKBKG, NFKB2, NFKBID, NFKBIZ, PDPK1, PIK3CB, PIK3R2, PIK3R3, PIK3R5, PLCG1
blue	MAPK__ImmunePathway	Immune	0.0453	36	AKT3, ARRB1, CRKL, GADD45A, IKBKB, IKBKG, MAP2K7, MAP3K1, MAP3K11, MAP3K13, MAP3K3, MAP4K4, MAPK1, MAPK14, MAPK3, MAPK4, MAPK6, MAPKAPK2, MRAS, NF1, NFATC1, PAK1, PAK2, PPM1A, PPP3R1, PRKACA, PRKCD, PTPN7, RASA2, RASGRF2, RASGRP1, RPS6KA5, SOS2, SRF, TAOK2, TRAF6
turquoise	Cell adhesion molecules__ImmunePathway	Immune	8.56e-08	29	CADM3, CD34, CDH2, CLDN5, CNTN1, CNTNAP1, CNTNAP2, GLG1, ITGA6, ITGAV, ITGB8, L1CAM, MAG, MPZL1, NCAM1, NCAM2, NEO1, NFASC, NLGN1, NLGN2, NLGN3, NRCAM, NRXN1, NRXN2, NRXN3, OCLN, PTPRM, SDC3, VCAN

## Sheet: TurquoiseToppGene.txt
Category	ID	Name	Source	p-value	q-value Bonferroni	q-value FDR B&H	q-value FDR B&Y	Hit Count in Query List	Hit Count in Genome	Hit in Query List
GO: Molecular Function	GO:0022857	transmembrane transporter activity		7.133e-54	1.607e-50	1.607e-50	1.334e-49	261	1014	ABCA2,ABCA3,KCNH7,AQP11,SLC24A3,SLC12A5,SERINC1,KCNT1,ABCC1,STIM2,FAM26E,PEX3,HCN3,SLC7A14,SLC17A8,ATP1A1,ATP1A3,ATP1B1,ATP2B1,ATP2B2,ATP2B3,ATP2B4,ATP6V0B,ATP6V0A1,ATP6AP1,FXYD6,FXYD5,NDUFA4,BSG,SLC5A6,CACNA1I,CACNA1H,CACNA1G,NIPA1,CACNA1A,CACNA1B,SFXN4,CACNA1C,CACNA2D1,ATP6V0E1,HCN1,ATP13A5,SLCO4C1,P2RX4,SLC16A3,SLC33A1,KCNB2,CHRNA5,CHRNB2,ABCB1,ABCB4,CLCN2,CLCN3,CLCN4,CLCN6,CLCN7,NALCN,SLC24A2…
GO: Molecular Function	GO:0022891	substrate-specific transmembrane transporter activity		1.544e-51	3.478e-48	1.739e-48	1.443e-47	246	946	KCNH7,AQP11,SLC24A3,SLC12A5,SERINC1,KCNT1,ABCC1,STIM2,FAM26E,PEX3,HCN3,SLC7A14,SLC17A8,ATP1A1,ATP1A3,ATP1B1,ATP2B1,ATP2B2,ATP2B3,ATP2B4,ATP6V0B,ATP6V0A1,ATP6AP1,FXYD6,FXYD5,NDUFA4,BSG,SLC5A6,CACNA1I,CACNA1H,CACNA1G,NIPA1,CACNA1A,CACNA1B,SFXN4,CACNA1C,CACNA2D1,ATP6V0E1,HCN1,ATP13A5,SLCO4C1,P2RX4,SLC16A3,SLC33A1,KCNB2,CHRNA5,CHRNB2,CLCN2,CLCN3,CLCN4,CLCN6,CLCN7,NALCN,SLC24A2,TMEM38A,SLC39A6,TMEM109…
GO: Molecular Function	GO:0015075	ion transmembrane transporter activity		7.287e-47	1.642e-43	5.473e-44	4.541e-43	226	873	KCNH7,SLC24A3,SLC12A5,SERINC1,KCNT1,ABCC1,STIM2,FAM26E,PEX3,HCN3,SLC7A14,SLC17A8,ATP1A1,ATP1A3,ATP1B1,ATP2B1,ATP2B2,ATP2B3,ATP2B4,ATP6V0B,ATP6V0A1,ATP6AP1,FXYD6,FXYD5,NDUFA4,BSG,SLC5A6,CACNA1I,CACNA1H,CACNA1G,NIPA1,CACNA1A,CACNA1B,SFXN4,CACNA1C,CACNA2D1,ATP6V0E1,HCN1,ATP13A5,SLCO4C1,P2RX4,SLC16A3,SLC33A1,KCNB2,CHRNA5,CHRNB2,CLCN2,CLCN3,CLCN4,CLCN6,CLCN7,NALCN,SLC24A2,TMEM38A,SLC39A6,TMEM109,ZDHHC…
GO: Molecular Function	GO:0022892	substrate-specific transporter activity		3.19e-45	7.187e-42	1.797e-42	1.491e-41	262	1125	ABCA3,KCNH7,AQP11,SLC24A3,SLC12A5,SERINC1,KCNT1,ABCC1,STIM2,FAM26E,PEX3,HCN3,SLC7A14,SLC17A8,ATP1A1,ATP1A3,ATP1B1,ATP2B1,ATP2B2,ATP2B3,ATP2B4,ATP6V0B,ATP6V0A1,ATP6AP1,FXYD6,FXYD5,NDUFA4,BSG,SLC5A6,CACNA1I,CACNA1H,CACNA1G,NIPA1,CACNA1A,CACNA1B,SFXN4,CACNA1C,CACNA2D1,ATP6V0E1,HCN1,ATP13A5,SLCO4C1,P2RX4,SLC16A3,SLC33A1,KCNB2,CHRNA5,CHRNB2,ABCB4,CLCN2,CLCN3,CLCN4,CLCN6,CLCN7,NALCN,SLC24A2,TMEM38A,SLC…
GO: Molecular Function	GO:0005215	transporter activity		2.683e-44	6.044e-41	1.209e-41	1.003e-40	285	1294	ABCA2,ABCA3,KCNH7,AQP11,SLC24A3,SLC12A5,SERINC1,KCNT1,ABCC1,STIM2,FAM26E,PEX3,HCN3,SLC7A14,SLC17A8,ATP1A1,ATP1A3,ATP1B1,ATP2B1,ATP2B2,ATP2B3,ATP2B4,ATP6V0B,ATP6V0A1,ATP6AP1,FXYD6,FXYD5,NDUFA4,BSG,SLC5A6,CACNA1I,CACNA1H,CACNA1G,NIPA1,CACNA1A,CACNA1B,SFXN4,CACNA1C,CACNA2D1,ATP6V0E1,HCN1,ATP13A5,SLCO4C1,P2RX4,SLC16A3,SLC33A1,KCNB2,SYNPR,CHRNA5,CHRNB2,ABCB1,ABCB4,CLCN2,CLCN3,CLCN4,CLCN6,CLCN7,NALCN,S…
GO: Molecular Function	GO:0008324	cation transmembrane transporter activity		1.559e-31	3.512e-28	5.854e-29	4.857e-28	161	642	KCNH7,SLC24A3,SLC12A5,SERINC1,KCNT1,STIM2,FAM26E,HCN3,ATP1A1,ATP1A3,ATP1B1,ATP2B1,ATP2B2,ATP2B3,ATP2B4,ATP6V0B,ATP6V0A1,ATP6AP1,NDUFA4,SLC5A6,CACNA1I,CACNA1H,CACNA1G,NIPA1,CACNA1A,CACNA1B,CACNA1C,CACNA2D1,ATP6V0E1,HCN1,ATP13A5,P2RX4,SLC33A1,KCNB2,CHRNA5,CHRNB2,NALCN,SLC24A2,TMEM38A,SLC39A6,ZDHHC13,CNGA4,SLC4A7,SLC39A3,SLC2A8,COX4I1,SLC30A7,SLC13A5,TRPM4,CNNM2,PSEN1,KCNK4,KCNG2,SLC41A3,ATP2C2,ATP1…
GO: Molecular Function	GO:0046873	metal ion transmembrane transporter activity		9.482e-30	2.136e-26	3.052e-27	2.532e-26	122	426	KCNH7,SLC24A3,SLC12A5,KCNT1,STIM2,HCN3,ATP1A1,ATP1A3,ATP1B1,ATP2B1,ATP2B2,ATP2B3,ATP2B4,SLC5A6,CACNA1I,CACNA1H,CACNA1G,NIPA1,CACNA1A,CACNA1B,CACNA1C,CACNA2D1,HCN1,KCNB2,NALCN,SLC24A2,TMEM38A,SLC39A6,ZDHHC13,CNGA4,SLC4A7,SLC39A3,SLC30A7,SLC13A5,TRPM4,CNNM2,PSEN1,KCNK4,KCNG2,ATP2C2,SLC23A2,SLC6A15,TMEM38B,CNNM4,CACNG8,SLC39A9,MAGT1,SCN1A,SCN1B,SCN2A,SCN7A,SCN8A,TRPV2,SLC9A6,TMEM175,ORAI2,SLC1A1,SLC…
GO: Molecular Function	GO:0022804	active transmembrane transporter activity		1.636e-25	3.687e-22	4.608e-23	3.824e-22	104	363	ABCA2,ABCA3,SLC24A3,SLC12A5,ABCC1,SLC7A14,SLC17A8,ATP1A1,ATP1A3,ATP1B1,ATP2B1,ATP2B2,ATP2B3,ATP2B4,ATP6V0B,ATP6V0A1,ATP6AP1,SLC5A6,ATP6V0E1,ATP13A5,SLCO4C1,SLC16A3,SLC33A1,ABCB1,ABCB4,CLCN3,CLCN4,CLCN6,CLCN7,SLC24A2,SLC4A7,SLC2A8,ABCG1,SLC13A5,SLC45A1,TOMM20,SLC26A8,ATP2C2,ABCD4,ATP13A3,TMCO3,SLC23A2,SLC35A5,ABCC5,SLC6A15,SLC17A5,SLC10A7,ABCA8,ATP8A1,TIMM17A,SLC9A6,PCYOX1,SLC37A3,SLC35A1,SLC1A1,S…
GO: Molecular Function	GO:0005216	ion channel activity		1.052e-24	2.37e-21	2.633e-22	2.185e-21	113	424	KCNH7,SLC24A3,KCNT1,STIM2,FAM26E,HCN3,FXYD6,FXYD5,CACNA1I,CACNA1H,CACNA1G,CACNA1A,CACNA1B,CACNA1C,CACNA2D1,HCN1,P2RX4,KCNB2,CHRNA5,CHRNB2,CLCN2,CLCN3,CLCN4,CLCN6,CLCN7,NALCN,SLC24A2,TMEM38A,TMEM109,CNGA4,TRPM4,PSEN1,KCNK4,KCNG2,SLC26A8,ANO10,LRRC8D,TMEM38B,CALHM2,CACNG8,SCN1A,SCN1B,SCN2A,SCN7A,SCN8A,TRPV2,GPR89B,LRRC8C,TMEM175,ORAI2,SLC1A4,KCNV1,ANO3,CACNA2D3,SCN3B,GABRA1,GABRA2,GABRA3,KCNH5,GABR…
GO: Molecular Function	GO:0022838	substrate-specific channel activity		1.584e-24	3.569e-21	3.569e-22	2.962e-21	115	438	KCNH7,AQP11,SLC24A3,KCNT1,STIM2,FAM26E,HCN3,FXYD6,FXYD5,CACNA1I,CACNA1H,CACNA1G,CACNA1A,CACNA1B,CACNA1C,CACNA2D1,HCN1,P2RX4,KCNB2,CHRNA5,CHRNB2,CLCN2,CLCN3,CLCN4,CLCN6,CLCN7,NALCN,SLC24A2,TMEM38A,TMEM109,CNGA4,TRPM4,PSEN1,KCNK4,KCNG2,SLC26A8,ANO10,LRRC8D,TMEM38B,CALHM2,CACNG8,SCN1A,SCN1B,SCN2A,SCN7A,SCN8A,TRPV2,GPR89B,LRRC8C,TMEM175,ORAI2,SLC1A4,KCNV1,PDPN,ANO3,CACNA2D3,SCN3B,GABRA1,GABRA2,GABRA3…
GO: Molecular Function	GO:0022890	inorganic cation transmembrane transporter activity		3.644e-24	8.21e-21	7.464e-22	6.193e-21	131	542	KCNH7,SLC24A3,SLC12A5,KCNT1,STIM2,HCN3,ATP1A1,ATP1A3,ATP1B1,ATP2B1,ATP2B2,ATP2B3,ATP2B4,ATP6V0B,ATP6V0A1,ATP6AP1,NDUFA4,SLC5A6,CACNA1I,CACNA1H,CACNA1G,NIPA1,CACNA1A,CACNA1B,CACNA1C,CACNA2D1,ATP6V0E1,HCN1,KCNB2,NALCN,SLC24A2,TMEM38A,SLC39A6,ZDHHC13,CNGA4,SLC4A7,SLC39A3,COX4I1,SLC30A7,SLC13A5,TRPM4,CNNM2,PSEN1,KCNK4,KCNG2,ATP2C2,TMCO3,SLC23A2,SLC6A15,TMEM38B,CNNM4,CACNG8,SLC39A9,MAGT1,SCN1A,SCN1B,S…
GO: Molecular Function	GO:0015267	channel activity		2.429e-23	5.473e-20	4.561e-21	3.784e-20	118	470	KCNH7,AQP11,SLC24A3,KCNT1,STIM2,FAM26E,HCN3,FXYD6,FXYD5,CACNA1I,CACNA1H,CACNA1G,CACNA1A,CACNA1B,CACNA1C,CACNA2D1,HCN1,P2RX4,KCNB2,CHRNA5,CHRNB2,CLCN2,CLCN3,CLCN4,CLCN6,CLCN7,NALCN,SLC24A2,TMEM38A,TMEM109,CNGA4,TRPM4,PSEN1,TOMM20,KCNK4,KCNG2,SLC26A8,ANO10,LRRC8D,TMEM38B,CALHM2,CACNG8,SCN1A,SCN1B,SCN2A,SCN7A,SCN8A,TRPV2,TIMM17A,TOMM40,GPR89B,LRRC8C,TMEM175,ORAI2,SLC1A4,KCNV1,PDPN,ANO3,CACNA2D3,SCN3…
GO: Molecular Function	GO:0022803	passive transmembrane transporter activity		2.948e-23	6.642e-20	5.109e-21	4.239e-20	118	471	KCNH7,AQP11,SLC24A3,KCNT1,STIM2,FAM26E,HCN3,FXYD6,FXYD5,CACNA1I,CACNA1H,CACNA1G,CACNA1A,CACNA1B,CACNA1C,CACNA2D1,HCN1,P2RX4,KCNB2,CHRNA5,CHRNB2,CLCN2,CLCN3,CLCN4,CLCN6,CLCN7,NALCN,SLC24A2,TMEM38A,TMEM109,CNGA4,TRPM4,PSEN1,TOMM20,KCNK4,KCNG2,SLC26A8,ANO10,LRRC8D,TMEM38B,CALHM2,CACNG8,SCN1A,SCN1B,SCN2A,SCN7A,SCN8A,TRPV2,TIMM17A,TOMM40,GPR89B,LRRC8C,TMEM175,ORAI2,SLC1A4,KCNV1,PDPN,ANO3,CACNA2D3,SCN3…
GO: Molecular Function	GO:0016758	transferase activity, transferring hexosyl groups		2.864e-20	6.452e-17	4.609e-18	3.824e-17	68	210	GALNT16,MGAT2,MGAT5,C1GALT1C1,B4GALT4,B3GALT4,B3GALNT1,B3GALT2,DPY19L3,STT3B,LARGE1,B4GALT5,OSTC,PIGC,PIGH,ALG5,ALG8,CHPF2,KDELC1,ALG6,MGAT4C,ALG12,POMT2,GALNT9,GLT8D2,DAD1,GALNT18,CHPF,GALNT14,ALG9,CHSY3,RPN1,RPN2,EXT1,EXT2,EXTL1,EXTL2,EXTL3,CSGALNACT2,SDF2,POMGNT1,POMT1,GALNT11,UGGT2,FUT8,GLT8D1,EOGT,GALNT1,XYLT2,ALG1,FUT10,B4GALNT4,B4GAT1,DPY19L1,WBSCR17,POMGNT2,HEXA,MGAT4B,B4GALT7,UGCG,UGT8,A…
GO: Molecular Function	GO:0016757	transferase activity, transferring glycosyl groups		1.964e-19	4.425e-16	2.913e-17	2.417e-16	84	307	MAN2A2,MAN2B1,GALNT16,MGAT2,MGAT5,C1GALT1C1,B4GALT4,B3GALT4,B3GALNT1,B3GALT2,DPY19L3,ST3GAL5,STT3B,LARGE1,B4GALT5,OSTC,PIGC,PIGH,PDCL3,ALG5,ALG8,CHPF2,ST8SIA5,KDELC1,ALG6,MGAT4C,ALG12,POMT2,GALNT9,EDEM1,GLT8D2,DAD1,GALNT18,MANEAL,CHPF,DPAGT1,GALNT14,ALG9,CHSY3,RPN1,RPN2,EXT1,EXT2,EXTL1,EXTL2,EXTL3,CSGALNACT2,ST3GAL6,SDF2,POMGNT1,ST3GAL3,POMT1,EDEM3,GALNT11,EDEM2,UGGT2,FUT8,GLT8D1,EOGT,GALNT1,XYLT…
GO: Molecular Function	GO:0022836	gated channel activity		2.068e-19	4.66e-16	2.913e-17	2.417e-16	88	331	KCNH7,KCNT1,HCN3,CACNA1I,CACNA1H,CACNA1G,CACNA1A,CACNA1B,CACNA1C,CACNA2D1,HCN1,P2RX4,KCNB2,CHRNA5,CHRNB2,CLCN2,CLCN3,CLCN4,CLCN6,CLCN7,NALCN,TMEM38A,TMEM109,CNGA4,TRPM4,KCNK4,KCNG2,ANO10,CACNG8,SCN1A,SCN1B,SCN2A,SCN7A,SCN8A,GPR89B,KCNV1,ANO3,CACNA2D3,SCN3B,GABRA1,GABRA2,GABRA3,KCNH5,GABRA5,GABRB1,GABRB3,GABRD,GABRG2,GAS6,ABCC8,GLRA2,GLRB,GRIA1,GRIA3,GRIA4,GRID1,GRIK1,GRIK2,GRIK4,GRIK5,GRIN1,GRIN2…
GO: Molecular Function	GO:0008509	anion transmembrane transporter activity		3.989e-18	8.988e-15	5.287e-16	4.387e-15	80	297	SLC12A5,SERINC1,ABCC1,PEX3,SLC7A14,SLC17A8,BSG,SLCO4C1,SLC16A3,CLCN2,CLCN3,CLCN4,CLCN6,CLCN7,MPC2,SLC4A7,SLC13A5,CTNS,SLC26A8,SLC38A10,SLC23A2,SLC35B3,ABCC5,SLC6A15,ANO10,LRRC8D,SLC17A5,SLC22A17,PCYOX1,GPR89B,LRRC8C,SLC37A3,EMB,SLC35A1,SLC1A1,SLC1A4,SLC1A6,SLC3A2,PDPN,SLC6A7,SLC7A1,SLC7A4,SLC12A4,SLC15A4,SLC20A1,SLC22A5,SLC12A7,ANO3,SLC37A4,GABRA1,GABRA2,GABRA3,GABRA5,GABRB1,GABRB3,GABRD,GABRG2,C…
GO: Molecular Function	GO:0004553	hydrolase activity, hydrolyzing O-glycosyl compounds		8.613e-18	1.941e-14	1.078e-15	8.946e-15	59	182	MAN2A2,MAN2A1,MAN2B1,MANBA,ACHE,GALNT16,NCEH1,CHID1,HYAL2,B4GALT4,B3GALT2,DPY19L3,NAGA,NAGLU,NEU1,DAGLA,DAGLB,CD44,LARGE1,B4GALT5,CTSA,GALNT9,EDEM1,GLT8D2,GALNT18,MANEAL,GALNT14,ACER3,POMGNT1,EDEM3,EDEM2,FUCA1,FUCA2,GAA,GLT8D1,GBA,GANAB,GLA,GLB1,GM2A,FUT10,MAN2B2,B4GAT1,DPY19L1,ABHD2,WBSCR17,POMGNT2,PNPLA7,MAN1B1,HEXA,B4GALT7,UGGT1,POGLUT1,MOGS,GALNTL6,LCT,PLBD2,CEMIP,LYZ
GO: Molecular Function	GO:0016798	hydrolase activity, acting on glycosyl bonds		9.771e-17	2.201e-13	1.159e-14	9.614e-14	62	207	MAN2A2,MAN2A1,MAN2B1,MANBA,ACHE,GALNT16,NCEH1,CHID1,HYAL2,B4GALT4,B3GALT2,DPY19L3,NAGA,NAGLU,NEU1,DAGLA,DAGLB,CD44,LARGE1,B4GALT5,CTSA,GALNT9,EDEM1,GLT8D2,GALNT18,MANEAL,GALNT14,ACER3,RPS3,POMGNT1,EDEM3,EDEM2,SMPD1,FUCA1,FUCA2,GAA,GLT8D1,GBA,GANAB,SMPDL3B,GLA,GLB1,GM2A,FUT10,MAN2B2,B4GAT1,DPY19L1,ABHD2,WBSCR17,POMGNT2,PNPLA7,MAN1B1,HEXA,B4GALT7,UGGT1,POGLUT1,MOGS,GALNTL6,LCT,PLBD2,CEMIP,LYZ
GO: Molecular Function	GO:0072509	divalent inorganic cation transmembrane transporter activity		2.941e-16	6.626e-13	3.313e-14	2.749e-13	55	173	SLC24A3,STIM2,ATP2B1,ATP2B2,ATP2B3,ATP2B4,CACNA1I,CACNA1H,CACNA1G,NIPA1,CACNA1A,CACNA1B,CACNA1C,CACNA2D1,SLC24A2,SLC39A6,ZDHHC13,SLC39A3,SLC30A7,TRPM4,CNNM2,PSEN1,ATP2C2,CNNM4,CACNG8,MAGT1,TRPV2,ORAI2,SLC3A2,SLC30A6,SLC8A2,ATP2C1,CACNA2D3,SLC39A1,GAS6,GPM6A,GRIN1,GRIN2B,ZDHHC17,GRM7,IL1RAPL1,ORAI3,SLC39A14,TRPC1,TRPC4,TRPM2,SLC30A5,PANX1,ITGAV,SLC30A3,NIPA2,TUSC3,SLC39A10,NIPAL3,MCOLN1
GO: Molecular Function	GO:0015291	secondary active transmembrane transporter activity		4.593e-16	1.035e-12	4.927e-14	4.088e-13	66	236	SLC24A3,SLC12A5,SLC7A14,SLC17A8,SLC5A6,SLCO4C1,SLC16A3,SLC33A1,CLCN3,CLCN4,CLCN6,CLCN7,SLC24A2,SLC4A7,SLC2A8,SLC13A5,SLC45A1,SLC26A8,TMCO3,SLC23A2,SLC35A5,SLC6A15,SLC17A5,SLC10A7,SLC9A6,SLC37A3,SLC35A1,SLC1A1,SLC1A4,SLC1A6,SLC3A2,SLC6A7,SLC7A1,SLC8A2,SLC7A4,SLC9A1,SLC9A2,SLC9A5,SLC12A4,SLC15A2,SLC15A4,SLC19A1,SLC20A1,SLC22A5,SLC12A7,SLC37A4,SLC9A9,SLC16A11,SLC9A8,ANKH,SLC7A8,MFSD2A,SLC35A3,SLC7A3…
GO: Molecular Function	GO:0005244	voltage-gated ion channel activity		7.035e-16	1.585e-12	6.891e-14	5.718e-13	59	198	KCNH7,KCNT1,HCN3,CACNA1I,CACNA1H,CACNA1G,CACNA1A,CACNA1B,CACNA1C,CACNA2D1,HCN1,KCNB2,CLCN2,CLCN3,CLCN4,CLCN6,CLCN7,NALCN,TMEM109,CNGA4,TRPM4,KCNK4,KCNG2,CACNG8,SCN1A,SCN1B,SCN2A,SCN7A,SCN8A,GPR89B,KCNV1,CACNA2D3,SCN3B,KCNH5,GAS6,ABCC8,GRIK1,GRIN1,GRM7,KCNH3,IL1RAPL1,KCNQ5,VDAC3,HTR3A,KCNK12,KCNT2,ITGAV,KCNA1,KCNA2,KCNC1,KCNC3,KCNC4,KCNF1,KCNH2,KCNJ4,KCNJ9,KCNJ11,KCNS1,KCNS3
GO: Molecular Function	GO:0022832	voltage-gated channel activity		7.035e-16	1.585e-12	6.891e-14	5.718e-13	59	198	KCNH7,KCNT1,HCN3,CACNA1I,CACNA1H,CACNA1G,CACNA1A,CACNA1B,CACNA1C,CACNA2D1,HCN1,KCNB2,CLCN2,CLCN3,CLCN4,CLCN6,CLCN7,NALCN,TMEM109,CNGA4,TRPM4,KCNK4,KCNG2,CACNG8,SCN1A,SCN1B,SCN2A,SCN7A,SCN8A,GPR89B,KCNV1,CACNA2D3,SCN3B,KCNH5,GAS6,ABCC8,GRIK1,GRIN1,GRM7,KCNH3,IL1RAPL1,KCNQ5,VDAC3,HTR3A,KCNK12,KCNT2,ITGAV,KCNA1,KCNA2,KCNC1,KCNC3,KCNC4,KCNF1,KCNH2,KCNJ4,KCNJ9,KCNJ11,KCNS1,KCNS3
GO: Molecular Function	GO:0005261	cation channel activity		1.065e-15	2.399e-12	9.998e-14	8.296e-13	77	306	KCNH7,SLC24A3,KCNT1,STIM2,FAM26E,HCN3,CACNA1I,CACNA1H,CACNA1G,CACNA1A,CACNA1B,CACNA1C,CACNA2D1,HCN1,P2RX4,KCNB2,CHRNA5,CHRNB2,NALCN,SLC24A2,TMEM38A,CNGA4,TRPM4,PSEN1,KCNK4,KCNG2,ANO10,TMEM38B,CALHM2,CACNG8,SCN1A,SCN1B,SCN2A,SCN7A,SCN8A,TRPV2,TMEM175,ORAI2,KCNV1,CACNA2D3,SCN3B,KCNH5,GAS6,ABCC8,GPM6A,GRIK1,GRIN1,GRIN2B,GRM7,KCNH3,IL1RAPL1,ORAI3,TRPC1,TRPC4,TRPM2,KCNQ5,HTR3A,KCNK12,KCNT2,PANX1,ITGAV…
GO: Molecular Function	GO:0005509	calcium ion binding		1.177e-15	2.651e-12	1.06e-13	8.798e-13	136	710	MATN2,SLC24A3,LRP1B,TENM2,ESYT2,MGP,JAG1,PCDH19,MMP14,MMP15,MMP16,MMP17,PCDH10,LTBP4,SYT13,STIM2,MCFD2,PCDHB16,ARSA,ASPH,DLK2,ATP2B2,NDUFAB1,NELL1,NELL2,C1R,CACNA1B,CALR,CANX,NUCB2,PAM,ADGRE5,CDH2,PCDH1,PCDH7,PCDH8,CDH6,PCDH9,CDH8,CDH9,CDH10,CDH11,CDH12,CDH13,CDH18,CLGN,SLIT2,CRELD1,NRXN1,SLC24A2,PLA2G4A,PAMR1,GNPTAB,CRELD2,P4HTM,VCAN,EPDR1,EDEM1,PRRG2,MASP1,CLSTN3,SYT12,PCDHB5,DAG1,SPOCK2,LPCAT2…
GO: Molecular Function	GO:0050839	cell adhesion molecule binding		2.683e-15	6.045e-12	2.325e-13	1.929e-12	60	209	ADAM11,ADAM10,TENM2,NLGN2,MMP14,LTBP4,CD200,SEMA7A,ADAM22,CADM3,ADAM23,ADAM15,ADAM9,FXYD5,NEO1,CALR,CD9,P2RX4,P4HB,CDH13,NLGN3,NRXN3,NRXN1,NRXN2,COL3A1,COL16A1,CPE,NECTIN3,CTGF,CXADR,PSEN1,PTPRD,PTPRM,NECTIN1,NECTIN2,NPNT,EDIL3,FGFR1,CX3CL1,FBLN5,CIB2,SFRP2,FN1,ADGRL1,NLGN1,NPTN,GFRA1,ADAM17,GRIN2B,THY1,TIMP2,ICAM5,TNR,CADM4,TRPC4,ITGA6,ITGA3,ITGA7,CADM2,L1CAM
GO: Molecular Function	GO:0060089	molecular transducer activity		5.855e-15	1.319e-11	4.711e-13	3.909e-12	259	1708	KCNH7,MAS1,MC4R,ACVR1,ACVR1B,ACVR2A,ACVR2B,LRP1B,ADCYAP1R1,SORCS1,FZD9,ADORA2B,UNC5A,MET,ADRA1D,ADRA1B,ADRB1,SORCS2,NLGN2,LTBP4,PAQR7,CD200,ATRN,MRC1,AMFR,PRSS12,HCN3,CNTNAP1,MED4,UNC5C,HYAL2,CADM3,ADGRB1,ADGRB2,ADGRB3,NCAM1,NRP2,NRP1,NEO1,TSPO,NPY,DDR1,NPR2,NPY1R,NPY2R,NPY5R,HCN1,NTRK2,NTRK3,NTSR1,ADCK2,CCKBR,OPRL1,P2RX4,SCARB2,CD44,CD47,TREM2,ADGRE5,XPR1,CRLF1,PDGFRA,PDGFRB,CHRM1,CHRM3,CHRM4,CH…
GO: Molecular Function	GO:0004872	receptor activity		5.855e-15	1.319e-11	4.711e-13	3.909e-12	259	1708	KCNH7,MAS1,MC4R,ACVR1,ACVR1B,ACVR2A,ACVR2B,LRP1B,ADCYAP1R1,SORCS1,FZD9,ADORA2B,UNC5A,MET,ADRA1D,ADRA1B,ADRB1,SORCS2,NLGN2,LTBP4,PAQR7,CD200,ATRN,MRC1,AMFR,PRSS12,HCN3,CNTNAP1,MED4,UNC5C,HYAL2,CADM3,ADGRB1,ADGRB2,ADGRB3,NCAM1,NRP2,NRP1,NEO1,TSPO,NPY,DDR1,NPR2,NPY1R,NPY2R,NPY5R,HCN1,NTRK2,NTRK3,NTSR1,ADCK2,CCKBR,OPRL1,P2RX4,SCARB2,CD44,CD47,TREM2,ADGRE5,XPR1,CRLF1,PDGFRA,PDGFRB,CHRM1,CHRM3,CHRM4,CH…
GO: Molecular Function	GO:0019199	transmembrane receptor protein kinase activity		2.093e-14	4.716e-11	1.626e-12	1.349e-11	36	91	ACVR1,ACVR1B,ACVR2A,ACVR2B,MET,LTBP4,NRP2,NRP1,DDR1,NTRK2,NTRK3,ADCK2,PDGFRA,PDGFRB,NRG2,PTK7,EPHA10,EPHA3,EPHA4,EPHA5,EPHA7,EPHA8,EPHB1,EPHB2,EPHB3,EPHB6,RYK,EFEMP1,FGFR1,MERTK,NPTN,TYRO3,IGF1R,IGF2R,INSR,KIT
GO: Molecular Function	GO:0015929	hexosaminidase activity		4.635e-14	1.044e-10	3.481e-12	2.888e-11	36	93	MAN2A2,MAN2B1,GALNT16,HYAL2,B4GALT4,B3GALT2,DPY19L3,NAGA,NAGLU,CD44,LARGE1,B4GALT5,GALNT9,EDEM1,GLT8D2,GALNT18,MANEAL,GALNT14,POMGNT1,EDEM3,EDEM2,GLT8D1,GM2A,FUT10,MAN2B2,B4GAT1,DPY19L1,WBSCR17,POMGNT2,MAN1B1,HEXA,B4GALT7,UGGT1,POGLUT1,GALNTL6,CEMIP
GO: Molecular Function	GO:0004714	transmembrane receptor protein tyrosine kinase activity		5.988e-14	1.349e-10	4.352e-12	3.611e-11	30	67	MET,NRP2,NRP1,DDR1,NTRK2,NTRK3,PDGFRA,PDGFRB,NRG2,PTK7,EPHA10,EPHA3,EPHA4,EPHA5,EPHA7,EPHA8,EPHB1,EPHB2,EPHB3,EPHB6,RYK,EFEMP1,FGFR1,MERTK,NPTN,TYRO3,IGF1R,IGF2R,INSR,KIT
GO: Molecular Function	GO:0008375	acetylglucosaminyltransferase activity		9.992e-14	2.251e-10	7.035e-12	5.837e-11	36	95	GALNT16,MGAT2,MGAT5,B4GALT4,B3GALT2,DPY19L3,LARGE1,B4GALT5,PIGC,PIGH,MGAT4C,GALNT9,GLT8D2,GALNT18,GALNT14,EXT1,EXT2,EXTL1,EXTL2,EXTL3,POMGNT1,GLT8D1,EOGT,XYLT2,FUT10,B4GAT1,DPY19L1,WBSCR17,POMGNT2,HEXA,MGAT4B,B4GALT7,UGGT1,POGLUT1,GALNTL6,LFNG
GO: Molecular Function	GO:0008194	UDP-glycosyltransferase activity		1.063e-13	2.394e-10	7.255e-12	6.02e-11	49	162	GALNT16,MGAT2,MGAT5,B4GALT4,B3GALT4,B3GALNT1,B3GALT2,DPY19L3,LARGE1,B4GALT5,PIGC,PIGH,ALG5,CHPF2,MGAT4C,GALNT9,GLT8D2,GALNT18,CHPF,GALNT14,CHSY3,EXT1,EXT2,EXTL1,EXTL2,EXTL3,CSGALNACT2,POMGNT1,GALNT11,UGGT2,GLT8D1,EOGT,GALNT1,XYLT2,FUT10,B4GALNT4,B4GAT1,DPY19L1,WBSCR17,POMGNT2,HEXA,MGAT4B,B4GALT7,UGCG,UGT8,UGGT1,POGLUT1,GALNTL6,LFNG
GO: Molecular Function	GO:0004576	oligosaccharyl transferase activity		2.856e-13	6.434e-10	1.892e-11	1.57e-10	29	66	GALNT16,B4GALT4,B3GALT2,DPY19L3,STT3B,LARGE1,B4GALT5,OSTC,ALG5,GALNT9,GLT8D2,DAD1,GALNT18,GALNT14,RPN1,RPN2,POMGNT1,GLT8D1,FUT10,B4GAT1,DPY19L1,WBSCR17,POMGNT2,B4GALT7,UGGT1,STT3A,POGLUT1,GALNTL6,TUSC3
GO: Molecular Function	GO:0022853	active ion transmembrane transporter activity		6.801e-13	1.532e-09	4.378e-11	3.632e-10	50	175	SLC24A3,SLC12A5,ABCC1,ATP1A1,ATP1A3,ATP1B1,ATP2B1,ATP2B2,ATP2B3,ATP2B4,ATP6V0B,ATP6V0A1,ATP6AP1,ATP6V0E1,ATP13A5,SLC24A2,SLC4A7,SLC13A5,SLC26A8,ATP2C2,ATP13A3,SLC23A2,ABCC5,SLC6A15,ATP8A1,SLC9A6,PCYOX1,SLC37A3,SLC1A1,SLC3A2,SLC6A7,SLC8A2,SLC9A1,SLC9A2,ATP2C1,SLC9A5,SLC12A4,SLC20A1,SLC22A5,SLC12A7,SLC37A4,SLC9A9,ABCC8,SLC9A8,SLC26A10,SLC12A9,SLC17A7,ABCC10,ATP13A1,SLC4A10
GO: Molecular Function	GO:0000030	mannosyltransferase activity		1.444e-12	3.253e-09	9.037e-11	7.498e-10	30	74	GALNT16,B4GALT4,B3GALT2,DPY19L3,LARGE1,B4GALT5,ALG5,ALG8,ALG12,POMT2,GALNT9,GLT8D2,GALNT18,GALNT14,ALG9,SDF2,POMGNT1,POMT1,GLT8D1,ALG1,FUT10,B4GAT1,DPY19L1,WBSCR17,POMGNT2,B4GALT7,ALG2,UGGT1,POGLUT1,GALNTL6
GO: Molecular Function	GO:0008376	acetylgalactosaminyltransferase activity		2.188e-12	4.93e-09	1.332e-10	1.106e-09	30	75	GALNT16,B4GALT4,B3GALNT1,B3GALT2,DPY19L3,LARGE1,B4GALT5,CHPF2,GALNT9,GLT8D2,GALNT18,CHPF,GALNT14,CHSY3,EXTL2,CSGALNACT2,POMGNT1,GALNT11,GLT8D1,GALNT1,FUT10,B4GALNT4,B4GAT1,DPY19L1,WBSCR17,POMGNT2,B4GALT7,UGGT1,POGLUT1,GALNTL6
GO: Molecular Function	GO:0043492	ATPase activity, coupled to movement of substances		2.608e-12	5.877e-09	1.547e-10	1.283e-09	40	125	ABCA2,ABCA3,ABCC1,ATP1A1,ATP1A3,ATP1B1,ATP2B1,ATP2B2,ATP2B3,ATP2B4,ATP6V0B,ATP6V0A1,ATP6AP1,ATP6V0E1,ATP13A5,ABCB1,ABCB4,ABCG1,ATP2C2,ABCD4,ATP13A3,ABCC5,ATP9A,ATP9B,ABCA8,ATP8A1,PCYOX1,ATP2C1,ATP8A2,ABCG4,ATP11B,ABCC8,TAP1,TAP2,TAPBP,ABCB9,ABCA5,ABCB8,ABCC10,ATP13A1
GO: Molecular Function	GO:0015077	monovalent inorganic cation transmembrane transporter activity		4.08e-12	9.191e-09	2.357e-10	1.956e-09	80	375	KCNH7,SLC24A3,SLC12A5,KCNT1,HCN3,ATP1A1,ATP1A3,ATP1B1,ATP6V0B,ATP6V0A1,ATP6AP1,NDUFA4,SLC5A6,ATP6V0E1,HCN1,KCNB2,NALCN,SLC24A2,TMEM38A,CNGA4,SLC4A7,COX4I1,SLC13A5,TRPM4,KCNK4,KCNG2,TMCO3,SLC23A2,SLC6A15,TMEM38B,CNNM4,SCN1A,SCN1B,SCN2A,SCN7A,SCN8A,SLC9A6,TMEM175,SLC1A1,SLC1A6,SLC3A2,KCNV1,SLC6A7,SLC8A2,SLC9A1,SLC9A2,SLC9A5,SLC12A4,SLC20A1,SLC22A5,SLC12A7,SCN3B,KCNH5,SLC9A9,ABCC8,SURF1,SLC9A8,KCNH3…
GO: Molecular Function	GO:0015079	potassium ion transmembrane transporter activity		9.112e-12	2.053e-08	5.132e-10	4.259e-09	43	146	KCNH7,SLC24A3,SLC12A5,KCNT1,HCN3,ATP1A1,ATP1A3,ATP1B1,HCN1,KCNB2,SLC24A2,TMEM38A,CNGA4,KCNK4,KCNG2,TMEM38B,TMEM175,KCNV1,SLC12A4,SLC12A7,KCNH5,ABCC8,SLC9A8,KCNH3,KCNQ5,HTR3A,KCNK12,KCNT2,KCNA1,KCNA2,KCNC1,SLC12A9,KCNC3,KCNC4,KCNF1,KCNH2,KCNJ4,KCNJ9,KCNJ11,KCNN1,KCNN2,KCNS1,KCNS3
GO: Molecular Function	GO:0015405	P-P-bond-hydrolysis-driven transmembrane transporter activity		9.823e-12	2.213e-08	5.269e-10	4.372e-09	38	119	ABCA2,ABCA3,ABCC1,ATP1A1,ATP1A3,ATP1B1,ATP2B1,ATP2B2,ATP2B3,ATP2B4,ATP6V0B,ATP6V0A1,ATP6AP1,ATP6V0E1,ATP13A5,ABCB1,ABCB4,ABCG1,TOMM20,ATP2C2,ABCD4,ATP13A3,ABCC5,ABCA8,ATP8A1,TIMM17A,PCYOX1,ATP2C1,ABCG4,ABCC8,TAP1,TAP2,TAPBP,ABCB9,ABCA5,ABCB8,ABCC10,ATP13A1
GO: Molecular Function	GO:0015399	primary active transmembrane transporter activity		9.823e-12	2.213e-08	5.269e-10	4.372e-09	38	119	ABCA2,ABCA3,ABCC1,ATP1A1,ATP1A3,ATP1B1,ATP2B1,ATP2B2,ATP2B3,ATP2B4,ATP6V0B,ATP6V0A1,ATP6AP1,ATP6V0E1,ATP13A5,ABCB1,ABCB4,ABCG1,TOMM20,ATP2C2,ABCD4,ATP13A3,ABCC5,ABCA8,ATP8A1,TIMM17A,PCYOX1,ATP2C1,ABCG4,ABCC8,TAP1,TAP2,TAPBP,ABCB9,ABCA5,ABCB8,ABCC10,ATP13A1
GO: Molecular Function	GO:0042626	ATPase activity, coupled to transmembrane movement of substances		1.538e-11	3.466e-08	8.06e-10	6.688e-09	36	110	ABCA2,ABCA3,ABCC1,ATP1A1,ATP1A3,ATP1B1,ATP2B1,ATP2B2,ATP2B3,ATP2B4,ATP6V0B,ATP6V0A1,ATP6AP1,ATP6V0E1,ATP13A5,ABCB1,ABCB4,ABCG1,ATP2C2,ABCD4,ATP13A3,ABCC5,ABCA8,ATP8A1,PCYOX1,ATP2C1,ABCG4,ABCC8,TAP1,TAP2,TAPBP,ABCB9,ABCA5,ABCB8,ABCC10,ATP13A1
GO: Molecular Function	GO:0046527	glucosyltransferase activity		1.775e-11	3.999e-08	9.089e-10	7.542e-09	28	71	GALNT16,B4GALT4,B3GALT2,DPY19L3,LARGE1,B4GALT5,ALG5,ALG8,KDELC1,ALG6,GALNT9,GLT8D2,GALNT18,GALNT14,POMGNT1,UGGT2,GLT8D1,FUT10,B4GAT1,DPY19L1,WBSCR17,POMGNT2,B4GALT7,UGCG,UGT8,UGGT1,POGLUT1,GALNTL6
GO: Molecular Function	GO:0016820	hydrolase activity, acting on acid anhydrides, catalyzing transmembrane movement of substances		2.069e-11	4.663e-08	1.036e-09	8.597e-09	36	111	ABCA2,ABCA3,ABCC1,ATP1A1,ATP1A3,ATP1B1,ATP2B1,ATP2B2,ATP2B3,ATP2B4,ATP6V0B,ATP6V0A1,ATP6AP1,ATP6V0E1,ATP13A5,ABCB1,ABCB4,ABCG1,ATP2C2,ABCD4,ATP13A3,ABCC5,ABCA8,ATP8A1,PCYOX1,ATP2C1,ABCG4,ABCC8,TAP1,TAP2,TAPBP,ABCB9,ABCA5,ABCB8,ABCC10,ATP13A1
GO: Molecular Function	GO:0099600	transmembrane receptor activity		3.489e-11	7.86e-08	1.709e-09	1.418e-08	206	1386	KCNH7,MAS1,MC4R,ACVR1,ACVR1B,ACVR2A,ACVR2B,ADCYAP1R1,SORCS1,FZD9,ADORA2B,UNC5A,MET,ADRA1D,ADRA1B,ADRB1,SORCS2,LTBP4,MRC1,HCN3,UNC5C,ADGRB1,ADGRB2,ADGRB3,NRP2,NRP1,NPY,DDR1,NPR2,NPY1R,NPY2R,NPY5R,HCN1,NTRK2,NTRK3,NTSR1,ADCK2,CCKBR,OPRL1,P2RX4,CD44,TREM2,ADGRE5,XPR1,PDGFRA,PDGFRB,CHRM1,CHRM3,CHRM4,CHRNA5,CHRNB2,GLP2R,NRXN3,NRXN1,NRXN2,ACKR2,CNGA4,PLXNA1,PLXNA2,TAPT1,NRG2,GABBR2,IL21R,PLXNA4,PTH1R,P…
GO: Molecular Function	GO:0022843	voltage-gated cation channel activity		4.312e-11	9.716e-08	2.067e-09	1.715e-08	41	141	KCNH7,KCNT1,HCN3,CACNA1I,CACNA1H,CACNA1G,CACNA1A,CACNA1B,CACNA1C,CACNA2D1,HCN1,KCNB2,CNGA4,KCNG2,CACNG8,KCNV1,CACNA2D3,KCNH5,GAS6,ABCC8,GRIK1,GRIN1,GRM7,KCNH3,IL1RAPL1,KCNQ5,HTR3A,KCNT2,ITGAV,KCNA1,KCNA2,KCNC1,KCNC3,KCNC4,KCNF1,KCNH2,KCNJ4,KCNJ9,KCNJ11,KCNS1,KCNS3
GO: Molecular Function	GO:0035251	UDP-glucosyltransferase activity		2.723e-10	6.136e-07	1.278e-08	1.061e-07	25	64	GALNT16,B4GALT4,B3GALT2,DPY19L3,LARGE1,B4GALT5,ALG5,GALNT9,GLT8D2,GALNT18,GALNT14,POMGNT1,UGGT2,GLT8D1,FUT10,B4GAT1,DPY19L1,WBSCR17,POMGNT2,B4GALT7,UGCG,UGT8,UGGT1,POGLUT1,GALNTL6
GO: Molecular Function	GO:0038023	signaling receptor activity		2.865e-10	6.454e-07	1.317e-08	1.093e-07	208	1436	MAS1,MC4R,ACVR1,ACVR1B,ACVR2A,ACVR2B,ADCYAP1R1,SORCS1,FZD9,ADORA2B,UNC5A,MET,ADRA1D,ADRA1B,ADRB1,SORCS2,LTBP4,PAQR7,MRC1,UNC5C,ADGRB1,ADGRB2,ADGRB3,NRP2,NRP1,TSPO,NPY,DDR1,NPR2,NPY1R,NPY2R,NPY5R,NTRK2,NTRK3,NTSR1,ADCK2,CCKBR,OPRL1,P2RX4,CD44,CD47,TREM2,ADGRE5,XPR1,PDGFRA,PDGFRB,CHRM1,CHRM3,CHRM4,CHRNA5,CHRNB2,GLP2R,NRXN3,NRXN1,NRXN2,ACKR2,PLXNA1,PLXNA2,TAPT1,NRG2,GABBR2,IL21R,PLXNA4,PTH1R,PTK7,PT…
GO: Molecular Function	GO:0004888	transmembrane signaling receptor activity		3.31e-10	7.458e-07	1.492e-08	1.238e-07	195	1327	MAS1,MC4R,ACVR1,ACVR1B,ACVR2A,ACVR2B,ADCYAP1R1,SORCS1,FZD9,ADORA2B,UNC5A,MET,ADRA1D,ADRA1B,ADRB1,SORCS2,LTBP4,MRC1,UNC5C,ADGRB1,ADGRB2,ADGRB3,NRP2,NRP1,NPY,DDR1,NPR2,NPY1R,NPY2R,NPY5R,NTRK2,NTRK3,NTSR1,ADCK2,CCKBR,OPRL1,P2RX4,CD44,TREM2,ADGRE5,XPR1,PDGFRA,PDGFRB,CHRM1,CHRM3,CHRM4,CHRNA5,CHRNB2,GLP2R,NRXN3,NRXN1,NRXN2,ACKR2,PLXNA1,PLXNA2,TAPT1,NRG2,GABBR2,IL21R,PLXNA4,PTH1R,PTK7,PTPRA,PTPRD,PTPRE,…
GO: Molecular Function	GO:0030246	carbohydrate binding		9.775e-10	2.202e-06	4.283e-08	3.554e-07	62	290	MAG,CLEC18A,MAN2A2,MAN2A1,MAN2B1,MANBA,GALNT16,MGAT2,ATRN,MRC1,CHID1,LAYN,BSG,NPTX2,CALR,CANX,P4HA1,CD34,PAM,CLN5,PLOD1,PLOD2,CNTN1,SLC2A8,P4HTM,GALNT9,VCAN,MLEC,GALNT18,FBXO6,NECTIN1,CD302,GALNT14,DGCR2,OGFOD2,OGFOD3,CDIPT,ADGRL1,SLC2A3,GALNT11,FUCA1,GAA,GALNT1,GANAB,OS9,ADGRL2,ADGRL3,MAN2B2,NOMO1,WBSCR17,SUSD2,GPCPD1,CALR3,DCBLD1,COLEC12,IGF2R,EMC7,LMAN2L,GAL3ST3,GALNTL6,LMAN1,M6PR
GO: Molecular Function	GO:0042281	dolichyl pyrophosphate Man9GlcNAc2 alpha-1,3-glucosyltransferase activity		9.885e-10	2.227e-06	4.283e-08	3.554e-07	23	58	GALNT16,B4GALT4,B3GALT2,DPY19L3,LARGE1,B4GALT5,ALG8,ALG6,GALNT9,GLT8D2,GALNT18,GALNT14,POMGNT1,GLT8D1,FUT10,B4GAT1,DPY19L1,WBSCR17,POMGNT2,B4GALT7,UGGT1,POGLUT1,GALNTL6
GO: Molecular Function	GO:0015085	calcium ion transmembrane transporter activity		1.182e-09	2.663e-06	5.024e-08	4.169e-07	37	132	SLC24A3,STIM2,ATP2B1,ATP2B2,ATP2B3,ATP2B4,CACNA1I,CACNA1H,CACNA1G,CACNA1A,CACNA1B,CACNA1C,CACNA2D1,SLC24A2,TRPM4,PSEN1,ATP2C2,CACNG8,TRPV2,ORAI2,SLC3A2,SLC8A2,ATP2C1,CACNA2D3,GAS6,GPM6A,GRIN1,GRIN2B,GRM7,IL1RAPL1,ORAI3,TRPC1,TRPC4,TRPM2,PANX1,ITGAV,MCOLN1
GO: Molecular Function	GO:0000033	alpha-1,3-mannosyltransferase activity		1.474e-09	3.321e-06	6.151e-08	5.104e-07	23	59	GALNT16,B4GALT4,B3GALT2,DPY19L3,LARGE1,B4GALT5,ALG8,GALNT9,GLT8D2,GALNT18,GALNT14,POMGNT1,GLT8D1,FUT10,B4GAT1,DPY19L1,WBSCR17,POMGNT2,B4GALT7,ALG2,UGGT1,POGLUT1,GALNTL6
GO: Molecular Function	GO:0003756	protein disulfide isomerase activity		1.792e-09	4.037e-06	7.209e-08	5.982e-07	14	23	P4HB,TMX3,PDIA4,QSOX1,QSOX2,PIGK,TXNDC11,ERP44,ERP29,PDIA3,TMX4,ERO1B,TMX1,TXNDC5
GO: Molecular Function	GO:0016864	intramolecular oxidoreductase activity, transposing S-S bonds		1.792e-09	4.037e-06	7.209e-08	5.982e-07	14	23	P4HB,TMX3,PDIA4,QSOX1,QSOX2,PIGK,TXNDC11,ERP44,ERP29,PDIA3,TMX4,ERO1B,TMX1,TXNDC5
GO: Molecular Function	GO:0008514	organic anion transmembrane transporter activity		2.079e-09	4.685e-06	8.219e-08	6.82e-07	45	183	SERINC1,ABCC1,PEX3,SLC7A14,SLC17A8,BSG,SLCO4C1,SLC16A3,MPC2,SLC4A7,SLC13A5,CTNS,SLC26A8,SLC38A10,SLC23A2,SLC35B3,ABCC5,SLC6A15,SLC17A5,SLC22A17,EMB,SLC35A1,SLC1A1,SLC1A4,SLC1A6,SLC3A2,PDPN,SLC6A7,SLC7A1,SLC7A4,SLC15A4,SLC22A5,SERINC3,SLC16A11,SLC7A8,SLC35A3,SLC7A3,SLC35B4,SLCO2B1,SLC26A10,SLC6A17,SLCO4A1,SLC35B2,SLC17A7,SLC7A5
GO: Molecular Function	GO:0004583	dolichyl-phosphate-glucose-glycolipid alpha-glucosyltransferase activity		2.175e-09	4.901e-06	8.451e-08	7.012e-07	23	60	GALNT16,B4GALT4,B3GALT2,DPY19L3,LARGE1,B4GALT5,ALG8,ALG6,GALNT9,GLT8D2,GALNT18,GALNT14,POMGNT1,GLT8D1,FUT10,B4GAT1,DPY19L1,WBSCR17,POMGNT2,B4GALT7,UGGT1,POGLUT1,GALNTL6
GO: Molecular Function	GO:0015293	symporter activity		3.685e-09	8.302e-06	1.407e-07	1.168e-06	38	143	SLC24A3,SLC12A5,SLC17A8,SLC5A6,SLC16A3,SLC33A1,SLC24A2,SLC4A7,SLC2A8,SLC13A5,SLC45A1,SLC23A2,SLC35A5,SLC6A15,SLC17A5,SLC10A7,SLC35A1,SLC1A1,SLC1A4,SLC1A6,SLC6A7,SLC12A4,SLC15A2,SLC15A4,SLC20A1,SLC22A5,SLC12A7,SLC16A11,MFSD2A,SLC35A3,SLC2A6,MFSD3,SLC35A2,SLC6A17,SLC12A9,SLC17A7,SLC45A4,SLC4A10
GO: Molecular Function	GO:0046921	alpha-(1->6)-fucosyltransferase activity		4.173e-09	9.402e-06	1.492e-07	1.238e-06	22	57	GALNT16,B4GALT4,B3GALT2,DPY19L3,LARGE1,B4GALT5,GALNT9,GLT8D2,GALNT18,GALNT14,POMGNT1,FUT8,GLT8D1,FUT10,B4GAT1,DPY19L1,WBSCR17,POMGNT2,B4GALT7,UGGT1,POGLUT1,GALNTL6
GO: Molecular Function	GO:0019187	beta-1,4-mannosyltransferase activity		4.173e-09	9.402e-06	1.492e-07	1.238e-06	22	57	GALNT16,B4GALT4,B3GALT2,DPY19L3,LARGE1,B4GALT5,GALNT9,GLT8D2,GALNT18,GALNT14,POMGNT1,GLT8D1,ALG1,FUT10,B4GAT1,DPY19L1,WBSCR17,POMGNT2,B4GALT7,UGGT1,POGLUT1,GALNTL6
GO: Molecular Function	GO:0003980	UDP-glucose:glycoprotein glucosyltransferase activity		4.173e-09	9.402e-06	1.492e-07	1.238e-06	22	57	GALNT16,B4GALT4,B3GALT2,DPY19L3,LARGE1,B4GALT5,GALNT9,GLT8D2,GALNT18,GALNT14,POMGNT1,UGGT2,GLT8D1,FUT10,B4GAT1,DPY19L1,WBSCR17,POMGNT2,B4GALT7,UGGT1,POGLUT1,GALNTL6
GO: Molecular Function	GO:0000009	alpha-1,6-mannosyltransferase activity		4.173e-09	9.402e-06	1.492e-07	1.238e-06	22	57	GALNT16,B4GALT4,B3GALT2,DPY19L3,LARGE1,B4GALT5,ALG12,GALNT9,GLT8D2,GALNT18,GALNT14,POMGNT1,GLT8D1,FUT10,B4GAT1,DPY19L1,WBSCR17,POMGNT2,B4GALT7,UGGT1,POGLUT1,GALNTL6
GO: Molecular Function	GO:0045499	chemorepellent activity		5.355e-09	1.207e-05	1.885e-07	1.564e-06	15	28	SEMA7A,SLIT2,SEMA3E,SEMA4C,EPHA7,SEMA6C,SEMA3F,SEMA6B,SEMA4F,SEMA4D,SEMA4B,SEMA3C,SEMA4A,FLRT3,FLRT2
GO: Molecular Function	GO:0015297	antiporter activity		6.089e-09	1.372e-05	2.058e-07	1.707e-06	27	83	SLC24A3,SLC7A14,CLCN3,CLCN4,CLCN6,CLCN7,SLC24A2,SLC26A8,TMCO3,SLC9A6,SLC37A3,SLC3A2,SLC7A1,SLC8A2,SLC7A4,SLC9A1,SLC9A2,SLC9A5,SLC22A5,SLC37A4,SLC9A9,SLC9A8,SLC7A8,SLC7A3,SLC26A10,SLC4A10,SLC7A5
GO: Molecular Function	GO:0000026	alpha-1,2-mannosyltransferase activity		6.119e-09	1.379e-05	2.058e-07	1.707e-06	22	58	GALNT16,B4GALT4,B3GALT2,DPY19L3,LARGE1,B4GALT5,GALNT9,GLT8D2,GALNT18,GALNT14,ALG9,POMGNT1,GLT8D1,FUT10,B4GAT1,DPY19L1,WBSCR17,POMGNT2,B4GALT7,UGGT1,POGLUT1,GALNTL6
GO: Molecular Function	GO:0004376	glycolipid mannosyltransferase activity		6.119e-09	1.379e-05	2.058e-07	1.707e-06	22	58	GALNT16,B4GALT4,B3GALT2,DPY19L3,LARGE1,B4GALT5,GALNT9,GLT8D2,GALNT18,GALNT14,POMGNT1,GLT8D1,FUT10,B4GAT1,DPY19L1,WBSCR17,POMGNT2,B4GALT7,ALG2,UGGT1,POGLUT1,GALNTL6
GO: Molecular Function	GO:0015081	sodium ion transmembrane transporter activity		1.053e-08	2.373e-05	3.489e-07	2.895e-06	36	136	SLC24A3,HCN3,ATP1A1,ATP1A3,ATP1B1,SLC5A6,HCN1,NALCN,SLC24A2,SLC4A7,SLC13A5,TRPM4,SLC23A2,SLC6A15,CNNM4,SCN1A,SCN1B,SCN2A,SCN7A,SCN8A,SLC9A6,SLC1A1,SLC1A6,SLC3A2,SLC6A7,SLC8A2,SLC9A1,SLC9A2,SLC9A5,SLC20A1,SCN3B,SLC9A9,SLC9A8,TRPM2,SLC6A17,SLC17A7
GO: Molecular Function	GO:0005230	extracellular ligand-gated ion channel activity		1.711e-08	3.856e-05	4.293e-07	3.562e-06	25	76	P2RX4,CHRNA5,CHRNB2,GABRA1,GABRA2,GABRA3,GABRA5,GABRB1,GABRB3,GABRD,GABRG2,GLRA2,GLRB,GRIA1,GRIA3,GRIA4,GRID1,GRIK1,GRIK2,GRIK4,GRIK5,GRIN1,GRIN2B,HTR3A,SLC17A7
GO: Molecular Function	GO:0033556	dolichyl pyrophosphate Man7GlcNAc2 alpha-1,3-glucosyltransferase activity		1.715e-08	3.864e-05	4.293e-07	3.562e-06	21	56	GALNT16,B4GALT4,B3GALT2,DPY19L3,LARGE1,B4GALT5,GALNT9,GLT8D2,GALNT18,GALNT14,POMGNT1,GLT8D1,FUT10,B4GAT1,DPY19L1,WBSCR17,POMGNT2,B4GALT7,UGGT1,POGLUT1,GALNTL6
GO: Molecular Function	GO:0052641	benzoic acid glucosyltransferase activity		1.715e-08	3.864e-05	4.293e-07	3.562e-06	21	56	GALNT16,B4GALT4,B3GALT2,DPY19L3,LARGE1,B4GALT5,GALNT9,GLT8D2,GALNT18,GALNT14,POMGNT1,GLT8D1,FUT10,B4GAT1,DPY19L1,WBSCR17,POMGNT2,B4GALT7,UGGT1,POGLUT1,GALNTL6
GO: Molecular Function	GO:0080062	cytokinin 9-beta-glucosyltransferase activity		1.715e-08	3.864e-05	4.293e-07	3.562e-06	21	56	GALNT16,B4GALT4,B3GALT2,DPY19L3,LARGE1,B4GALT5,GALNT9,GLT8D2,GALNT18,GALNT14,POMGNT1,GLT8D1,FUT10,B4GAT1,DPY19L1,WBSCR17,POMGNT2,B4GALT7,UGGT1,POGLUT1,GALNTL6
GO: Molecular Function	GO:0035496	lipopolysaccharide-1,5-galactosyltransferase activity		1.715e-08	3.864e-05	4.293e-07	3.562e-06	21	56	GALNT16,B4GALT4,B3GALT2,DPY19L3,LARGE1,B4GALT5,GALNT9,GLT8D2,GALNT18,GALNT14,POMGNT1,GLT8D1,FUT10,B4GAT1,DPY19L1,WBSCR17,POMGNT2,B4GALT7,UGGT1,POGLUT1,GALNTL6
GO: Molecular Function	GO:0018717	9-phenanthrol glycosyltransferase activity		1.715e-08	3.864e-05	4.293e-07	3.562e-06	21	56	GALNT16,B4GALT4,B3GALT2,DPY19L3,LARGE1,B4GALT5,GALNT9,GLT8D2,GALNT18,GALNT14,POMGNT1,GLT8D1,FUT10,B4GAT1,DPY19L1,WBSCR17,POMGNT2,B4GALT7,UGGT1,POGLUT1,GALNTL6
GO: Molecular Function	GO:0008921	lipopolysaccharide-1,6-galactosyltransferase activity		1.715e-08	3.864e-05	4.293e-07	3.562e-06	21	56	GALNT16,B4GALT4,B3GALT2,DPY19L3,LARGE1,B4GALT5,GALNT9,GLT8D2,GALNT18,GALNT14,POMGNT1,GLT8D1,FUT10,B4GAT1,DPY19L1,WBSCR17,POMGNT2,B4GALT7,UGGT1,POGLUT1,GALNTL6
GO: Molecular Function	GO:0018718	1,2-dihydroxy-phenanthrene glycosyltransferase activity		1.715e-08	3.864e-05	4.293e-07	3.562e-06	21	56	GALNT16,B4GALT4,B3GALT2,DPY19L3,LARGE1,B4GALT5,GALNT9,GLT8D2,GALNT18,GALNT14,POMGNT1,GLT8D1,FUT10,B4GAT1,DPY19L1,WBSCR17,POMGNT2,B4GALT7,UGGT1,POGLUT1,GALNTL6
GO: Molecular Function	GO:0052824	dolichyl-pyrophosphate Man7GlcNAc2 alpha-1,6-mannosyltransferase activity		1.715e-08	3.864e-05	4.293e-07	3.562e-06	21	56	GALNT16,B4GALT4,B3GALT2,DPY19L3,LARGE1,B4GALT5,GALNT9,GLT8D2,GALNT18,GALNT14,POMGNT1,GLT8D1,FUT10,B4GAT1,DPY19L1,WBSCR17,POMGNT2,B4GALT7,UGGT1,POGLUT1,GALNTL6
GO: Molecular Function	GO:0052638	indole-3-butyrate beta-glucosyltransferase activity		1.715e-08	3.864e-05	4.293e-07	3.562e-06	21	56	GALNT16,B4GALT4,B3GALT2,DPY19L3,LARGE1,B4GALT5,GALNT9,GLT8D2,GALNT18,GALNT14,POMGNT1,GLT8D1,FUT10,B4GAT1,DPY19L1,WBSCR17,POMGNT2,B4GALT7,UGGT1,POGLUT1,GALNTL6
GO: Molecular Function	GO:0016759	cellulose synthase activity		1.715e-08	3.864e-05	4.293e-07	3.562e-06	21	56	GALNT16,B4GALT4,B3GALT2,DPY19L3,LARGE1,B4GALT5,GALNT9,GLT8D2,GALNT18,GALNT14,POMGNT1,GLT8D1,FUT10,B4GAT1,DPY19L1,WBSCR17,POMGNT2,B4GALT7,UGGT1,POGLUT1,GALNTL6
GO: Molecular Function	GO:0019112	phenanthrol glycosyltransferase activity		1.715e-08	3.864e-05	4.293e-07	3.562e-06	21	56	GALNT16,B4GALT4,B3GALT2,DPY19L3,LARGE1,B4GALT5,GALNT9,GLT8D2,GALNT18,GALNT14,POMGNT1,GLT8D1,FUT10,B4GAT1,DPY19L1,WBSCR17,POMGNT2,B4GALT7,UGGT1,POGLUT1,GALNTL6
GO: Molecular Function	GO:0033931	endogalactosaminidase activity		1.715e-08	3.864e-05	4.293e-07	3.562e-06	21	56	GALNT16,B4GALT4,B3GALT2,DPY19L3,LARGE1,B4GALT5,GALNT9,GLT8D2,GALNT18,GALNT14,POMGNT1,GLT8D1,FUT10,B4GAT1,DPY19L1,WBSCR17,POMGNT2,B4GALT7,UGGT1,POGLUT1,GALNTL6
GO: Molecular Function	GO:0031278	alpha-1,2-galactosyltransferase activity		1.715e-08	3.864e-05	4.293e-07	3.562e-06	21	56	GALNT16,B4GALT4,B3GALT2,DPY19L3,LARGE1,B4GALT5,GALNT9,GLT8D2,GALNT18,GALNT14,POMGNT1,GLT8D1,FUT10,B4GAT1,DPY19L1,WBSCR17,POMGNT2,B4GALT7,UGGT1,POGLUT1,GALNTL6
GO: Molecular Function	GO:0018716	1-phenanthrol glycosyltransferase activity		1.715e-08	3.864e-05	4.293e-07	3.562e-06	21	56	GALNT16,B4GALT4,B3GALT2,DPY19L3,LARGE1,B4GALT5,GALNT9,GLT8D2,GALNT18,GALNT14,POMGNT1,GLT8D1,FUT10,B4GAT1,DPY19L1,WBSCR17,POMGNT2,B4GALT7,UGGT1,POGLUT1,GALNTL6
GO: Molecular Function	GO:0052757	chondroitin hydrolase activity		1.715e-08	3.864e-05	4.293e-07	3.562e-06	21	56	GALNT16,B4GALT4,B3GALT2,DPY19L3,LARGE1,B4GALT5,GALNT9,GLT8D2,GALNT18,GALNT14,POMGNT1,GLT8D1,FUT10,B4GAT1,DPY19L1,WBSCR17,POMGNT2,B4GALT7,UGGT1,POGLUT1,GALNTL6
GO: Molecular Function	GO:0018715	9-phenanthrol UDP-glucuronosyltransferase activity		1.715e-08	3.864e-05	4.293e-07	3.562e-06	21	56	GALNT16,B4GALT4,B3GALT2,DPY19L3,LARGE1,B4GALT5,GALNT9,GLT8D2,GALNT18,GALNT14,POMGNT1,GLT8D1,FUT10,B4GAT1,DPY19L1,WBSCR17,POMGNT2,B4GALT7,UGGT1,POGLUT1,GALNTL6
GO: Molecular Function	GO:0045140	inositol phosphoceramide synthase activity		1.715e-08	3.864e-05	4.293e-07	3.562e-06	21	56	GALNT16,B4GALT4,B3GALT2,DPY19L3,LARGE1,B4GALT5,GALNT9,GLT8D2,GALNT18,GALNT14,POMGNT1,GLT8D1,FUT10,B4GAT1,DPY19L1,WBSCR17,POMGNT2,B4GALT7,UGGT1,POGLUT1,GALNTL6
GO: Molecular Function	GO:0052639	salicylic acid glucosyltransferase (ester-forming) activity		1.715e-08	3.864e-05	4.293e-07	3.562e-06	21	56	GALNT16,B4GALT4,B3GALT2,DPY19L3,LARGE1,B4GALT5,GALNT9,GLT8D2,GALNT18,GALNT14,POMGNT1,GLT8D1,FUT10,B4GAT1,DPY19L1,WBSCR17,POMGNT2,B4GALT7,UGGT1,POGLUT1,GALNTL6
GO: Molecular Function	GO:0008755	O antigen polymerase activity		1.715e-08	3.864e-05	4.293e-07	3.562e-06	21	56	GALNT16,B4GALT4,B3GALT2,DPY19L3,LARGE1,B4GALT5,GALNT9,GLT8D2,GALNT18,GALNT14,POMGNT1,GLT8D1,FUT10,B4GAT1,DPY19L1,WBSCR17,POMGNT2,B4GALT7,UGGT1,POGLUT1,GALNTL6
GO: Molecular Function	GO:0052640	salicylic acid glucosyltransferase (glucoside-forming) activity		1.715e-08	3.864e-05	4.293e-07	3.562e-06	21	56	GALNT16,B4GALT4,B3GALT2,DPY19L3,LARGE1,B4GALT5,GALNT9,GLT8D2,GALNT18,GALNT14,POMGNT1,GLT8D1,FUT10,B4GAT1,DPY19L1,WBSCR17,POMGNT2,B4GALT7,UGGT1,POGLUT1,GALNTL6
GO: Molecular Function	GO:0042283	dolichyl pyrophosphate Glc1Man9GlcNAc2 alpha-1,3-glucosyltransferase activity		1.715e-08	3.864e-05	4.293e-07	3.562e-06	21	56	GALNT16,B4GALT4,B3GALT2,DPY19L3,LARGE1,B4GALT5,GALNT9,GLT8D2,GALNT18,GALNT14,POMGNT1,GLT8D1,FUT10,B4GAT1,DPY19L1,WBSCR17,POMGNT2,B4GALT7,UGGT1,POGLUT1,GALNTL6
GO: Molecular Function	GO:0005178	integrin binding		2.407e-08	5.423e-05	5.895e-07	4.891e-06	33	122	ADAM11,ADAM10,MMP14,LTBP4,SEMA7A,ADAM22,ADAM23,ADAM15,ADAM9,CALR,CD9,P4HB,COL3A1,COL16A1,CTGF,CXADR,NPNT,EDIL3,CX3CL1,FBLN5,CIB2,SFRP2,FN1,GFRA1,ADAM17,THY1,TIMP2,ICAM5,TNR,ITGA6,ITGA3,ITGA7,L1CAM
GO: Molecular Function	GO:0005267	potassium channel activity		2.407e-08	5.423e-05	5.895e-07	4.891e-06	33	122	KCNH7,KCNT1,HCN3,HCN1,KCNB2,TMEM38A,CNGA4,KCNK4,KCNG2,TMEM38B,TMEM175,KCNV1,KCNH5,ABCC8,KCNH3,KCNQ5,HTR3A,KCNK12,KCNT2,KCNA1,KCNA2,KCNC1,KCNC3,KCNC4,KCNF1,KCNH2,KCNJ4,KCNJ9,KCNJ11,KCNN1,KCNN2,KCNS1,KCNS3
GO: Molecular Function	GO:0015020	glucuronosyltransferase activity		2.498e-08	5.627e-05	6.051e-07	5.021e-06	27	88	GALNT16,B4GALT4,B3GALT2,DPY19L3,LARGE1,B4GALT5,CHPF2,GALNT9,GLT8D2,GALNT18,CHPF,GALNT14,CHSY3,EXT1,EXT2,POMGNT1,GLT8D1,FUT10,B4GAT1,DPY19L1,WBSCR17,POMGNT2,B4GALT7,UGT8,UGGT1,POGLUT1,GALNTL6
GO: Molecular Function	GO:0008066	glutamate receptor activity		3.041e-08	6.85e-05	7.288e-07	6.047e-06	14	27	GRIA1,GRIA3,GRIA4,GRID1,GRIK1,GRIK2,GRIK4,GRIK5,GRIN1,GRIN2B,GRM2,GRM5,GRM7,GRM8
GO: Molecular Function	GO:0008378	galactosyltransferase activity		3.087e-08	6.956e-05	7.29e-07	6.049e-06	25	78	GALNT16,C1GALT1C1,B4GALT4,B3GALT4,B3GALNT1,B3GALT2,DPY19L3,LARGE1,B4GALT5,GALNT9,GLT8D2,GALNT18,GALNT14,POMGNT1,GLT8D1,FUT10,B4GAT1,DPY19L1,WBSCR17,POMGNT2,B4GALT7,UGT8,UGGT1,POGLUT1,GALNTL6
GO: Molecular Function	GO:0004871	signal transducer activity		3.106e-08	6.998e-05	7.29e-07	6.049e-06	238	1786	MAS1,MC4R,ACVR1,ACVR1B,ACVR2A,ACVR2B,ADCYAP1R1,SORCS1,FZD9,ADORA2B,UNC5A,MET,ADRA1D,ADRA1B,ADRB1,SORCS2,LTBP4,PAQR7,MRC1,IFITM1,UNC5C,ADGRB1,ADGRB2,ADGRB3,NRP2,NRP1,TSPO,NPY,DDR1,NPR2,NPY1R,NPY2R,NPY5R,NTRK2,NTRK3,NTSR1,ADCK2,MAP3K6,CCKBR,TMED4,OPRL1,P2RX4,CD44,CD47,TREM2,ADGRE5,XPR1,PDGFRA,PDGFRB,WNT4,CHRM1,CHRM3,CHRM4,CHRNA5,CHRNB2,GLP2R,NRXN3,NRXN1,NRXN2,ACKR2,ZDHHC13,PLXNA1,PLXNA2,TAPT1,NRG2,…
GO: Molecular Function	GO:0001962	alpha-1,3-galactosyltransferase activity		3.528e-08	7.948e-05	8.194e-07	6.799e-06	21	58	GALNT16,B4GALT4,B3GALT2,DPY19L3,LARGE1,B4GALT5,GALNT9,GLT8D2,GALNT18,GALNT14,POMGNT1,GLT8D1,FUT10,B4GAT1,DPY19L1,WBSCR17,POMGNT2,B4GALT7,UGGT1,POGLUT1,GALNTL6
GO: Molecular Function	GO:0030594	neurotransmitter receptor activity		4.792e-08	0.000108	1.102e-06	9.141e-06	23	69	TSPO,CHRM1,CHRM3,CHRM4,CHRNA5,CHRNB2,DRD5,GABRA2,GABRA3,GABRB3,GABRG2,GLRA2,GRIA1,GRIA3,GRIA4,GRID1,GRIK1,GRIK2,GRIK4,GRIK5,GRIN1,GRIN2B,HTR3A
GO: Molecular Function	GO:0008417	fucosyltransferase activity		4.974e-08	0.0001121	1.124e-06	9.322e-06	22	64	GALNT16,B4GALT4,B3GALT2,DPY19L3,LARGE1,B4GALT5,GALNT9,GLT8D2,GALNT18,GALNT14,POMGNT1,FUT8,GLT8D1,FUT10,B4GAT1,DPY19L1,WBSCR17,POMGNT2,B4GALT7,UGGT1,POGLUT1,GALNTL6
GO: Molecular Function	GO:0046920	alpha-(1->3)-fucosyltransferase activity		4.987e-08	0.0001124	1.124e-06	9.322e-06	21	59	GALNT16,B4GALT4,B3GALT2,DPY19L3,LARGE1,B4GALT5,GALNT9,GLT8D2,GALNT18,GALNT14,POMGNT1,GLT8D1,FUT10,B4GAT1,DPY19L1,WBSCR17,POMGNT2,B4GALT7,UGGT1,POGLUT1,GALNTL6
GO: Molecular Function	GO:0001948	glycoprotein binding		5.638e-08	0.000127	1.258e-06	1.043e-05	32	120	ATP1A3,FBXO17,CALR,CANX,SLIT2,PLAT,CNTN1,CTSA,EDEM1,CTSB,CTSK,CTSL,CTSS,DAG1,FBXO6,LRRTM4,FGFR1,FST,FLNA,SLIT1,EDEM2,ERLEC1,GPC3,OS9,GPC1,AGRN,HSPA5,VLDLR,IGF2R,ITGA3,RGMA,LDLR
GO: Molecular Function	GO:0035250	UDP-galactosyltransferase activity		6.008e-08	0.0001354	1.327e-06	1.101e-05	24	75	GALNT16,B4GALT4,B3GALT4,B3GALNT1,B3GALT2,DPY19L3,LARGE1,B4GALT5,GALNT9,GLT8D2,GALNT18,GALNT14,POMGNT1,GLT8D1,FUT10,B4GAT1,DPY19L1,WBSCR17,POMGNT2,B4GALT7,UGT8,UGGT1,POGLUT1,GALNTL6
GO: Molecular Function	GO:0015108	chloride transmembrane transporter activity		7.061e-08	0.0001591	1.544e-06	1.281e-05	27	92	SLC12A5,CLCN2,CLCN3,CLCN4,CLCN6,CLCN7,SLC26A8,ANO10,PCYOX1,SLC1A4,SLC12A4,SLC12A7,ANO3,GABRA1,GABRA2,GABRA3,GABRA5,GABRB1,GABRB3,GABRD,GABRG2,CLCC1,GLRA2,GLRB,SLC26A10,SLC12A9,SLC17A7
GO: Molecular Function	GO:0005253	anion channel activity		9.051e-08	0.0002039	1.961e-06	1.627e-05	27	93	CLCN2,CLCN3,CLCN4,CLCN6,CLCN7,SLC26A8,ANO10,LRRC8D,GPR89B,LRRC8C,SLC1A4,ANO3,GABRA1,GABRA2,GABRA3,GABRA5,GABRB1,GABRB3,GABRD,GABRG2,CLCC1,GLRA2,GLRB,LRRC8A,VDAC3,SLC26A10,SLC17A7
GO: Molecular Function	GO:0022834	ligand-gated channel activity		1.11e-07	0.00025	2.358e-06	1.957e-05	36	148	KCNH7,HCN3,HCN1,P2RX4,CHRNA5,CHRNB2,CNGA4,GABRA1,GABRA2,GABRA3,GABRA5,GABRB1,GABRB3,GABRD,GABRG2,ABCC8,GLRA2,GLRB,GRIA1,GRIA3,GRIA4,GRID1,GRIK1,GRIK2,GRIK4,GRIK5,GRIN1,GRIN2B,KCNQ5,HTR3A,KCNH2,KCNJ4,KCNJ9,KCNJ11,SLC17A7,MCOLN1
GO: Molecular Function	GO:0015276	ligand-gated ion channel activity		1.11e-07	0.00025	2.358e-06	1.957e-05	36	148	KCNH7,HCN3,HCN1,P2RX4,CHRNA5,CHRNB2,CNGA4,GABRA1,GABRA2,GABRA3,GABRA5,GABRB1,GABRB3,GABRD,GABRG2,ABCC8,GLRA2,GLRB,GRIA1,GRIA3,GRIA4,GRID1,GRIK1,GRIK2,GRIK4,GRIK5,GRIN1,GRIN2B,KCNQ5,HTR3A,KCNH2,KCNJ4,KCNJ9,KCNJ11,SLC17A7,MCOLN1
GO: Molecular Function	GO:0019838	growth factor binding		1.17e-07	0.0002635	2.463e-06	2.043e-05	35	142	ACVR1,ACVR1B,ACVR2A,ACVR2B,LTBP4,VASN,HYAL2,NRP2,NRP1,NTRK2,NTRK3,FURIN,PDGFRA,PDGFRB,COL1A1,COL3A1,CTGF,SORT1,FGFR1,FSTL4,GLG1,GPC1,IL1RAPL1,AGRN,IGF1R,IGF2R,IGFBP2,IGFBP5,IGFBP7,IL6ST,IL11RA,INSR,ITGA6,ITGAV,LTBP3
GO: Molecular Function	GO:0015103	inorganic anion transmembrane transporter activity		1.864e-07	0.0004201	3.889e-06	3.227e-05	33	132	SLC12A5,CLCN2,CLCN3,CLCN4,CLCN6,CLCN7,SLC4A7,SLC26A8,ANO10,PCYOX1,SLC37A3,SLC1A4,SLC12A4,SLC20A1,SLC12A7,ANO3,SLC37A4,GABRA1,GABRA2,GABRA3,GABRA5,GABRB1,GABRB3,GABRD,GABRG2,CLCC1,GLRA2,GLRB,ANKH,SLC26A10,SLC12A9,SLC17A7,SLC4A10
GO: Molecular Function	GO:0005003	ephrin receptor activity		2.151e-07	0.0004846	4.446e-06	3.689e-05	11	19	NTRK3,EPHA10,EPHA3,EPHA4,EPHA5,EPHA7,EPHA8,EPHB1,EPHB2,EPHB3,EPHB6
GO: Molecular Function	GO:0005249	voltage-gated potassium channel activity		2.215e-07	0.0004991	4.537e-06	3.765e-05	26	91	KCNH7,KCNT1,HCN3,HCN1,KCNB2,CNGA4,KCNG2,KCNV1,KCNH5,ABCC8,KCNH3,KCNQ5,HTR3A,KCNT2,KCNA1,KCNA2,KCNC1,KCNC3,KCNC4,KCNF1,KCNH2,KCNJ4,KCNJ9,KCNJ11,KCNS1,KCNS3
GO: Molecular Function	GO:0019955	cytokine binding		2.424e-07	0.000546	4.919e-06	4.082e-05	28	103	ACVR1,ACVR2B,LTBP4,VASN,TCAP,HYAL2,NRP2,NRP1,CD44,NOG,CRLF1,ACKR2,PLP2,ACKR1,IL1RAPL1,TNFRSF1A,AGRN,PARK7,IFNAR1,IFNAR2,IFNGR1,IL6ST,IL11RA,ITGAV,CXCR4,ACKR3,KIT,LTBP3
GO: Molecular Function	GO:0015294	solute:cation symporter activity		2.943e-07	0.0006631	5.92e-06	4.912e-05	27	98	SLC12A5,SLC5A6,SLC33A1,SLC4A7,SLC2A8,SLC13A5,SLC23A2,SLC35A5,SLC6A15,SLC17A5,SLC35A1,SLC1A1,SLC1A6,SLC6A7,SLC12A4,SLC15A2,SLC15A4,SLC20A1,SLC12A7,SLC35A3,SLC2A6,MFSD3,SLC35A2,SLC6A17,SLC12A9,SLC17A7,SLC45A4
GO: Molecular Function	GO:0046943	carboxylic acid transmembrane transporter activity		3.091e-07	0.0006963	6.162e-06	5.113e-05	34	141	SERINC1,PEX3,SLC7A14,SLC17A8,BSG,SLC16A3,MPC2,SLC13A5,CTNS,SLC26A8,SLC38A10,SLC23A2,SLC6A15,SLC17A5,EMB,SLC1A1,SLC1A4,SLC1A6,SLC3A2,PDPN,SLC6A7,SLC7A1,SLC7A4,SLC15A4,SLC22A5,SERINC3,SLC16A11,SLC7A8,SLC7A3,SLCO2B1,SLC26A10,SLC6A17,SLC17A7,SLC7A5
GO: Molecular Function	GO:0005102	receptor binding		4.184e-07	0.0009427	8.27e-06	6.862e-05	212	1607	MAG,ADAM11,ADAM10,TENM2,ADRB1,JAG1,NLGN2,C1QTNF4,MMP14,LTBP4,CD200,SEMA7A,APP,ADAM22,MED4,CAPRIN2,RSPO2,ATP1A3,ATP2B2,HYAL2,CADM3,ADAM23,ADAM15,ADAM9,BDNF,BMP3,BMP4,BMP7,NEO1,NMB,NPY,NPPC,CALCA,CALR,NTRK2,CANX,NUCB2,CAV2,CCK,CCKBR,CD9,P2RX4,P4HB,CD44,SNTG2,CD81,CRLF1,PDGFRA,PDGFRB,WNT4,CHGB,SLIT2,NLGN3,NRXN3,NRXN1,NRXN2,PDCL3,BAMBI,PLAT,PNOC,COL3A1,COL16A1,DERL1,NRG2,CXCL14,CPE,NECTIN3,LRRTM2,CTG…
GO: Molecular Function	GO:0005234	extracellular-glutamate-gated ion channel activity		4.366e-07	0.0009836	8.553e-06	7.097e-05	11	20	GRIA1,GRIA3,GRIA4,GRID1,GRIK1,GRIK2,GRIK4,GRIK5,GRIN1,GRIN2B,SLC17A7
GO: Molecular Function	GO:0022824	transmitter-gated ion channel activity		5.01e-07	0.001129	9.647e-06	8.004e-05	13	28	GABRB3,GLRA2,GRIA1,GRIA3,GRIA4,GRID1,GRIK1,GRIK2,GRIK4,GRIK5,GRIN1,GRIN2B,HTR3A
GO: Molecular Function	GO:0022835	transmitter-gated channel activity		5.01e-07	0.001129	9.647e-06	8.004e-05	13	28	GABRB3,GLRA2,GRIA1,GRIA3,GRIA4,GRID1,GRIK1,GRIK2,GRIK4,GRIK5,GRIN1,GRIN2B,HTR3A
GO: Molecular Function	GO:0005342	organic acid transmembrane transporter activity		5.249e-07	0.001183	1.002e-05	8.315e-05	34	144	SERINC1,PEX3,SLC7A14,SLC17A8,BSG,SLC16A3,MPC2,SLC13A5,CTNS,SLC26A8,SLC38A10,SLC23A2,SLC6A15,SLC17A5,EMB,SLC1A1,SLC1A4,SLC1A6,SLC3A2,PDPN,SLC6A7,SLC7A1,SLC7A4,SLC15A4,SLC22A5,SERINC3,SLC16A11,SLC7A8,SLC7A3,SLCO2B1,SLC26A10,SLC6A17,SLC17A7,SLC7A5
GO: Molecular Function	GO:0005001	transmembrane receptor protein tyrosine phosphatase activity		6.41e-07	0.001444	1.214e-05	0.0001007	10	17	PTPRA,PTPRD,PTPRE,PTPRK,PTPRM,PTPRN2,PTPRO,PTPRR,PTPRS,PTPRU
GO: Molecular Function	GO:0005262	calcium channel activity		6.856e-07	0.001545	1.287e-05	0.0001068	29	114	SLC24A3,STIM2,CACNA1I,CACNA1H,CACNA1G,CACNA1A,CACNA1B,CACNA1C,CACNA2D1,SLC24A2,TRPM4,PSEN1,CACNG8,TRPV2,ORAI2,CACNA2D3,GAS6,GPM6A,GRIN1,GRIN2B,GRM7,IL1RAPL1,ORAI3,TRPC1,TRPC4,TRPM2,PANX1,ITGAV,MCOLN1
GO: Molecular Function	GO:0042625	ATPase coupled ion transmembrane transporter activity		8.831e-07	0.00199	1.644e-05	0.0001364	22	74	ABCC1,ATP1A1,ATP1A3,ATP1B1,ATP2B1,ATP2B2,ATP2B3,ATP2B4,ATP6V0B,ATP6V0A1,ATP6AP1,ATP6V0E1,ATP13A5,ATP2C2,ATP13A3,ABCC5,ATP8A1,PCYOX1,ATP2C1,ABCC8,ABCC10,ATP13A1
GO: Molecular Function	GO:0030215	semaphorin receptor binding		1.53e-06	0.003447	2.825e-05	0.0002344	11	22	SEMA7A,SEMA3E,SEMA4C,SEMA6C,SEMA3F,SEMA6B,SEMA4F,SEMA4D,SEMA4B,SEMA3C,SEMA4A
GO: Molecular Function	GO:0042277	peptide binding		1.783e-06	0.004017	3.266e-05	0.000271	52	278	ACHE,MAS1,MC4R,ACVR1,ADCYAP1R1,NFKBIA,NPR2,CALR,OPRL1,FURIN,PCSK5,TPP1,PLOD1,ITM2A,PTGES,PPIB,CRHBP,CTSB,TOMM20,PTH1R,C2CD2L,DHCR24,ECE1,MEMO1,TM2D1,QRFPR,PPIH,CLSTN1,SORL1,SSTR2,SSTR3,KDELR1,TAP1,TAP2,TAPBP,GPR22,GPR37,SLC7A8,GSTP1,HCRTR1,HFE,HLA-A,HLA-E,HLA-G,BACE1,IGF1R,INSR,ITGAV,ITM2C,CEMIP,SLC7A5,LTC4S
GO: Molecular Function	GO:0016860	intramolecular oxidoreductase activity		1.844e-06	0.004155	3.351e-05	0.000278	18	55	P4HB,TMX3,PTGES,PDIA4,QSOX1,QSOX2,PIGK,TXNDC11,EBP,ERP44,EBPL,ERP29,TBXAS1,PDIA3,TMX4,ERO1B,TMX1,TXNDC5
GO: Molecular Function	GO:0038191	neuropilin binding		1.908e-06	0.004299	3.44e-05	0.0002854	9	15	SEMA7A,SEMA3E,SEMA4C,SEMA3F,SEMA4F,SEMA4D,SEMA4B,SEMA3C,SEMA4A
GO: Molecular Function	GO:1901677	phosphate transmembrane transporter activity		2.097e-06	0.004725	3.75e-05	0.0003111	13	31	SLC35B3,SLC35B1,SLC35E3,SLC37A3,SLC35A1,SLC20A1,SLC37A4,ANKH,SLC35A3,SLC35B4,SLC35A2,SLC35B2,SLC17A7
GO: Molecular Function	GO:0004579	dolichyl-diphosphooligosaccharide-protein glycotransferase activity		2.176e-06	0.004902	3.86e-05	0.0003202	7	9	STT3B,OSTC,DAD1,RPN1,RPN2,STT3A,TUSC3
GO: Molecular Function	GO:0015295	solute:proton symporter activity		2.471e-06	0.005566	4.349e-05	0.0003608	12	27	SLC33A1,SLC2A8,SLC35A5,SLC17A5,SLC35A1,SLC15A2,SLC15A4,SLC35A3,SLC2A6,MFSD3,SLC35A2,SLC45A4
GO: Molecular Function	GO:0004970	ionotropic glutamate receptor activity		2.544e-06	0.005731	4.409e-05	0.0003658	10	19	GRIA1,GRIA3,GRIA4,GRID1,GRIK1,GRIK2,GRIK4,GRIK5,GRIN1,GRIN2B
GO: Molecular Function	GO:0003841	1-acylglycerol-3-phosphate O-acyltransferase activity		2.544e-06	0.005731	4.409e-05	0.0003658	10	19	LPCAT4,MBOAT7,LPCAT2,LPCAT1,AGPAT5,MBOAT2,GPAT4,TAZ,AGPAT3,AGPAT4
GO: Molecular Function	GO:0015923	mannosidase activity		3.611e-06	0.008135	6.21e-05	0.0005153	17	52	MAN2A2,MAN2A1,MAN2B1,MANBA,ACHE,NCEH1,DAGLA,DAGLB,EDEM1,MANEAL,EDEM3,EDEM2,MAN2B2,ABHD2,PNPLA7,MAN1B1,PLBD2
GO: Molecular Function	GO:0015171	amino acid transmembrane transporter activity		3.736e-06	0.008418	6.377e-05	0.0005292	22	80	SERINC1,PEX3,SLC7A14,SLC17A8,CTNS,SLC38A10,SLC6A15,SLC1A1,SLC1A4,SLC1A6,SLC3A2,PDPN,SLC6A7,SLC7A1,SLC7A4,SLC15A4,SERINC3,SLC7A8,SLC7A3,SLC6A17,SLC17A7,SLC7A5
GO: Molecular Function	GO:0046915	transition metal ion transmembrane transporter activity		3.872e-06	0.008723	6.559e-05	0.0005442	15	42	SLC39A6,SLC39A3,SLC30A7,ATP2C2,SLC30A6,ATP2C1,SLC39A1,TF,SLC39A14,TRPM2,SLC30A5,SLC30A3,ATP13A1,SLC39A10,MCOLN1
GO: Molecular Function	GO:0042171	lysophosphatidic acid acyltransferase activity		4.651e-06	0.01048	7.738e-05	0.0006421	10	20	LPCAT4,MBOAT7,LPCAT2,LPCAT1,AGPAT5,MBOAT2,GPAT4,TAZ,AGPAT3,AGPAT4
GO: Molecular Function	GO:0071617	lysophospholipid acyltransferase activity		4.651e-06	0.01048	7.738e-05	0.0006421	10	20	LPCAT4,MBOAT7,LPCAT2,LPCAT1,AGPAT5,MBOAT2,GPAT4,TAZ,AGPAT3,AGPAT4
GO: Molecular Function	GO:0005254	chloride channel activity		4.671e-06	0.01052	7.738e-05	0.0006421	22	81	CLCN2,CLCN3,CLCN4,CLCN6,CLCN7,SLC26A8,ANO10,SLC1A4,ANO3,GABRA1,GABRA2,GABRA3,GABRA5,GABRB1,GABRB3,GABRD,GABRG2,CLCC1,GLRA2,GLRB,SLC26A10,SLC17A7
GO: Molecular Function	GO:0051119	sugar transmembrane transporter activity		4.855e-06	0.01094	7.936e-05	0.0006585	13	33	SLC2A8,SLC45A1,SLC23A2,SLC35A5,SLC17A5,SLC35A1,SLC2A1,SLC2A3,SLC35A3,SLC2A6,SLC35A2,SLC45A4,M6PR
GO: Molecular Function	GO:0005004	GPI-linked ephrin receptor activity		4.861e-06	0.01095	7.936e-05	0.0006585	6	7	NTRK3,EPHA3,EPHA4,EPHA5,EPHA7,EPHA8
GO: Molecular Function	GO:1904680	peptide transmembrane transporter activity		6.649e-06	0.01498	0.0001078	0.0008943	7	10	ABCC1,SLC15A2,SLC15A4,TAP1,TAP2,TAPBP,ABCB9
GO: Molecular Function	GO:0015095	magnesium ion transmembrane transporter activity		7.759e-06	0.01748	0.0001249	0.001036	9	17	NIPA1,ZDHHC13,CNNM2,CNNM4,MAGT1,ZDHHC17,NIPA2,TUSC3,NIPAL3
GO: Molecular Function	GO:0030165	PDZ domain binding		8.424e-06	0.01898	0.0001346	0.001117	27	115	ACVR2A,ADRB1,KIDINS220,ATP2B1,ATP2B2,ATP2B3,ATP2B4,SNTG2,CLCN3,CXADR,PSEN1,TMEM88,NLGN1,SLC22A5,SSTR2,KIRREL3,ADAM17,ADGRL2,LNX1,GRIA1,GRIA3,GRIK2,GRIK5,GRM7,KCNJ4,KCNJ9,L1CAM
GO: Molecular Function	GO:0015179	L-amino acid transmembrane transporter activity		8.505e-06	0.01916	0.0001349	0.00112	17	55	SERINC1,SLC7A14,SLC17A8,CTNS,SLC6A15,SLC1A1,SLC1A4,SLC1A6,SLC6A7,SLC7A1,SLC7A4,SLC15A4,SERINC3,SLC7A8,SLC7A3,SLC17A7,SLC7A5
GO: Molecular Function	GO:0015924	mannosyl-oligosaccharide mannosidase activity		9.492e-06	0.02139	0.0001496	0.001241	16	50	MAN2A2,MAN2A1,MAN2B1,ACHE,NCEH1,DAGLA,DAGLB,EDEM1,MANEAL,EDEM3,EDEM2,MAN2B2,ABHD2,PNPLA7,MAN1B1,PLBD2
GO: Molecular Function	GO:0005231	excitatory extracellular ligand-gated ion channel activity		1.113e-05	0.02508	0.0001742	0.001445	17	56	P2RX4,CHRNA5,CHRNB2,GLRA2,GLRB,GRIA1,GRIA3,GRIA4,GRID1,GRIK1,GRIK2,GRIK4,GRIK5,GRIN1,GRIN2B,HTR3A,SLC17A7
GO: Molecular Function	GO:0015925	galactosidase activity		1.168e-05	0.02631	0.0001802	0.001495	11	26	MAN2A2,MAN2B1,NAGA,EDEM1,MANEAL,EDEM3,EDEM2,GLA,GLB1,MAN2B2,MAN1B1
GO: Molecular Function	GO:0015491	cation:cation antiporter activity		1.168e-05	0.02631	0.0001802	0.001495	11	26	SLC24A3,SLC24A2,SLC9A6,SLC3A2,SLC8A2,SLC9A1,SLC9A2,SLC9A5,SLC22A5,SLC9A9,SLC9A8
GO: Molecular Function	GO:0004559	alpha-mannosidase activity		1.261e-05	0.02842	0.0001933	0.001604	16	51	MAN2A2,MAN2A1,MAN2B1,ACHE,NCEH1,DAGLA,DAGLB,EDEM1,MANEAL,EDEM3,EDEM2,MAN2B2,ABHD2,PNPLA7,MAN1B1,PLBD2
GO: Molecular Function	GO:0016917	GABA receptor activity		1.361e-05	0.03066	0.0002072	0.001719	10	22	GABBR2,GABBR1,GABRA1,GABRA2,GABRA3,GABRA5,GABRB1,GABRB3,GABRD,GABRG2
GO: Molecular Function	GO:0050840	extracellular matrix binding		1.446e-05	0.03258	0.0002187	0.001815	17	57	ACHE,ADAM9,SLIT2,OLFML2B,CTSS,DAG1,SPOCK2,ECM1,ELN,SPP1,GPC1,AGRN,ITGA6,ITGA3,ITGA7,ITGAV,BCAM
GO: Molecular Function	GO:0017154	semaphorin receptor activity		1.677e-05	0.03778	0.0002519	0.00209	7	11	NRP2,NRP1,PLXNA1,PLXNA2,PLXNA4,PLXNC1,PLXNB2
GO: Molecular Function	GO:0008046	axon guidance receptor activity		1.783e-05	0.04017	0.000266	0.002207	6	8	ROBO1,ROBO2,EPHA7,EPHB1,EPHB2,EPHB3
GO: Molecular Function	GO:0033218	amide binding		1.922e-05	0.04331	0.0002849	0.002364	53	309	ACHE,MAS1,MC4R,ACVR1,ADCYAP1R1,NFKBIA,NPR2,CALR,OPRL1,FURIN,PCSK5,TPP1,PLOD1,ITM2A,PTGES,PPIB,CRHBP,CTSB,TOMM20,PTH1R,C2CD2L,DHCR24,ECE1,MEMO1,TM2D1,QRFPR,PPIH,CLSTN1,SLC19A1,SORL1,SSTR2,SSTR3,KDELR1,TAP1,TAP2,TAPBP,GPR22,GPR37,SLC7A8,GSTP1,HCRTR1,HFE,HLA-A,HLA-E,HLA-G,BACE1,IGF1R,INSR,ITGAV,ITM2C,CEMIP,SLC7A5,LTC4S
GO: Molecular Function	GO:0043236	laminin binding		2.038e-05	0.04592	0.0003001	0.00249	12	32	ACHE,ADAM9,SLIT2,CTSS,DAG1,ECM1,GPC1,AGRN,ITGA6,ITGA3,ITGA7,BCAM
GO: Molecular Function	GO:1901505	carbohydrate derivative transporter activity		2.095e-05	0.0472	0.0003045	0.002527	13	37	ABCG1,SLC35B3,SLC17A5,SLC35B1,SLC35E3,SLC37A3,SLC35A1,SLC37A4,SLC35A3,SLC35B4,SLC35A2,VLDLR,SLC35B2
GO: Molecular Function	GO:0005251	delayed rectifier potassium channel activity		2.095e-05	0.0472	0.0003045	0.002527	13	37	KCNB2,KCNG2,KCNV1,KCNQ5,KCNA1,KCNA2,KCNC1,KCNC3,KCNC4,KCNF1,KCNH2,KCNS1,KCNS3
GO: Molecular Function	GO:0005537	mannose binding		2.469e-05	0.05562	0.0003566	0.002959	9	19	MAN2B1,MANBA,MRC1,BSG,CLN5,IGF2R,LMAN2L,LMAN1,M6PR
GO: Molecular Function	GO:0015298	solute:cation antiporter activity		2.925e-05	0.0659	0.0004198	0.003483	12	33	SLC24A3,SLC24A2,TMCO3,SLC9A6,SLC3A2,SLC8A2,SLC9A1,SLC9A2,SLC9A5,SLC22A5,SLC9A9,SLC9A8
GO: Molecular Function	GO:0015605	organophosphate ester transmembrane transporter activity		3.451e-05	0.07776	0.0004891	0.004058	10	24	SLC35B3,SLC35B1,SLC35E3,SLC37A3,SLC35A1,SLC37A4,SLC35A3,SLC35B4,SLC35A2,SLC35B2
GO: Molecular Function	GO:0015928	fucosidase activity		3.451e-05	0.07776	0.0004891	0.004058	10	24	MAN2A2,MAN2B1,EDEM1,MANEAL,EDEM3,EDEM2,FUCA1,FUCA2,MAN2B2,MAN1B1
GO: Molecular Function	GO:0099516	ion antiporter activity		3.618e-05	0.08151	0.0005094	0.004227	16	55	SLC24A3,SLC24A2,SLC26A8,SLC9A6,SLC37A3,SLC3A2,SLC8A2,SLC9A1,SLC9A2,SLC9A5,SLC22A5,SLC37A4,SLC9A9,SLC9A8,SLC26A10,SLC4A10
GO: Molecular Function	GO:0015926	glucosidase activity		4.129e-05	0.09304	0.0005779	0.004795	12	34	MAN2A2,MAN2B1,EDEM1,MANEAL,EDEM3,EDEM2,GAA,GANAB,MAN2B2,MAN1B1,MOGS,LCT
GO: Molecular Function	GO:0016411	acylglycerol O-acyltransferase activity		4.234e-05	0.09539	0.0005888	0.004886	15	50	NAA10,DGAT1,LPCAT4,MBOAT7,LPCAT2,LPCAT1,AGPAT5,MBOAT2,DGAT2,GPAT4,TAZ,PLA2G15,PORCN,AGPAT3,AGPAT4
GO: Molecular Function	GO:0005351	sugar:proton symporter activity		4.357e-05	0.09817	0.0005986	0.004967	8	16	SLC2A8,SLC35A5,SLC17A5,SLC35A1,SLC35A3,SLC2A6,SLC35A2,SLC45A4
GO: Molecular Function	GO:0005402	cation:sugar symporter activity		4.357e-05	0.09817	0.0005986	0.004967	8	16	SLC2A8,SLC35A5,SLC17A5,SLC35A1,SLC35A3,SLC2A6,SLC35A2,SLC45A4
GO: Molecular Function	GO:0047184	1-acylglycerophosphocholine O-acyltransferase activity		4.384e-05	0.09877	0.0005986	0.004967	5	6	LPCAT4,LPCAT2,LPCAT1,MBOAT2,TAZ
GO: Molecular Function	GO:0019829	cation-transporting ATPase activity		4.827e-05	0.1087	0.0006551	0.005435	17	62	ATP1A1,ATP1A3,ATP1B1,ATP2B1,ATP2B2,ATP2B3,ATP2B4,ATP6V0B,ATP6V0A1,ATP6AP1,ATP6V0E1,ATP13A5,ATP2C2,ATP13A3,ATP8A1,ATP2C1,ATP13A1
GO: Molecular Function	GO:0043394	proteoglycan binding		5.74e-05	0.1293	0.0007744	0.006426	12	35	ATP1A3,SLIT2,CTSB,CTSK,CTSL,CTSS,LRRTM4,FST,SLIT1,GPC3,GPC1,AGRN
GO: Molecular Function	GO:0001653	peptide receptor activity		6.513e-05	0.1467	0.0008734	0.007247	28	135	MAS1,MC4R,SORCS1,SORCS2,NPR2,NPY1R,NPY2R,NPY5R,NTSR1,CCKBR,OPRL1,GLP2R,ACKR2,RAMP1,NPSR1,QRFPR,SORCS3,SSTR2,SSTR3,GPR75,GPR17,MCHR1,GPR37,HCRTR1,GPR182,CXCR4,ACKR3,AGTRAP
GO: Molecular Function	GO:0016780	phosphotransferase activity, for other substituted phosphate groups		6.581e-05	0.1483	0.0008773	0.007279	9	21	GNPTAB,PIGG,DPAGT1,CEPT1,CDIPT,GNPTG,PIGO,PTDSS2,CHPT1
GO: Molecular Function	GO:0008146	sulfotransferase activity		7.018e-05	0.1581	0.0009301	0.007717	15	52	TPST2,TPST1,NDST2,CHST1,NDST3,CHST2,CHST10,HS2ST1,HS3ST1,DSEL,CHST12,WSCD1,CHST8,CHST7,GAL3ST3
GO: Molecular Function	GO:0015197	peptide transporter activity		7.336e-05	0.1653	0.0009666	0.00802	7	13	ABCC1,SLC15A2,SLC15A4,TAP1,TAP2,TAPBP,ABCB9
GO: Molecular Function	GO:0004896	cytokine receptor activity		9.007e-05	0.2029	0.00118	0.00979	21	90	CD44,ACKR2,IL21R,IL1RAPL2,GFRA1,GFRA2,GPR75,GPR17,IL17RA,IFNAR1,IFNAR2,IFNGR1,IFNGR2,IL1RAP,IL4R,IL6ST,IL10RB,IL11RA,IL15RA,CXCR4,ACKR3
GO: Molecular Function	GO:0015440	peptide-transporting ATPase activity		9.286e-05	0.2092	0.001209	0.01003	4	4	TAP1,TAP2,TAPBP,ABCB9
GO: Molecular Function	GO:0005539	glycosaminoglycan binding		0.0001019	0.2295	0.001319	0.01094	39	219	LTBP4,APLP2,APP,RSPO2,HYAL2,LAYN,NCAM1,NRP2,NRP1,NELL1,BMP4,BMP7,NELL2,CD44,TREM2,SLIT2,PODXL2,SUSD5,VCAN,CTGF,SPOCK2,NDNF,HBEGF,TENM1,FGFR1,FN1,SLIT1,SLIT3,EGFLAM,HAPLN4,SMOC2,GNS,RSPO3,THBS2,TNFAIP6,AGRN,CEMIP,LPL,LRPAP1
GO: Molecular Function	GO:0008528	G-protein coupled peptide receptor activity		0.0001117	0.2517	0.001429	0.01185	27	132	MAS1,MC4R,SORCS1,SORCS2,NPY1R,NPY2R,NPY5R,NTSR1,CCKBR,OPRL1,GLP2R,ACKR2,RAMP1,NPSR1,QRFPR,SORCS3,SSTR2,SSTR3,GPR75,GPR17,MCHR1,GPR37,HCRTR1,GPR182,CXCR4,ACKR3,AGTRAP
GO: Molecular Function	GO:0005338	nucleotide-sugar transmembrane transporter activity		0.0001129	0.2543	0.001429	0.01185	6	10	SLC35B1,SLC35E3,SLC35A1,SLC35A3,SLC35B4,SLC35A2
GO: Molecular Function	GO:0005005	transmembrane-ephrin receptor activity		0.0001129	0.2543	0.001429	0.01185	6	10	EPHA10,EPHA4,EPHA5,EPHB1,EPHB2,EPHB3
GO: Molecular Function	GO:0015385	sodium:proton antiporter activity		0.0001129	0.2543	0.001429	0.01185	6	10	SLC9A6,SLC9A1,SLC9A2,SLC9A5,SLC9A9,SLC9A8
GO: Molecular Function	GO:0090599	alpha-glucosidase activity		0.0001136	0.2559	0.00143	0.01186	10	27	MAN2A2,MAN2B1,EDEM1,MANEAL,EDEM3,EDEM2,GAA,GANAB,MAN2B2,MAN1B1
GO: Molecular Function	GO:0050431	transforming growth factor beta binding		0.0001244	0.2802	0.001557	0.01292	8	18	ACVR1,ACVR2B,LTBP4,VASN,HYAL2,AGRN,ITGAV,LTBP3
GO: Molecular Function	GO:0016670	oxidoreductase activity, acting on a sulfur group of donors, oxygen as acceptor		0.000141	0.3177	0.001746	0.01448	5	7	PCYOX1L,TMX3,QSOX1,QSOX2,PCYOX1
GO: Molecular Function	GO:0015165	pyrimidine nucleotide-sugar transmembrane transporter activity		0.000141	0.3177	0.001746	0.01448	5	7	SLC35B1,SLC35A1,SLC35A3,SLC35B4,SLC35A2
GO: Molecular Function	GO:0048029	monosaccharide binding		0.0001494	0.3366	0.001839	0.01526	19	80	MAN2B1,MANBA,MRC1,BSG,P4HA1,PAM,CLN5,PLOD1,PLOD2,SLC2A8,P4HTM,OGFOD2,OGFOD3,SLC2A3,COLEC12,IGF2R,LMAN2L,LMAN1,M6PR
GO: Molecular Function	GO:0005385	zinc ion transmembrane transporter activity		0.0001533	0.3455	0.001877	0.01558	9	23	SLC39A6,SLC39A3,SLC30A7,SLC30A6,SLC39A1,SLC39A14,SLC30A5,SLC30A3,SLC39A10
GO: Molecular Function	GO:0008933	lytic transglycosylase activity		0.0001558	0.3511	0.001898	0.01575	11	33	MAN2A2,MAN2B1,ST8SIA5,EDEM1,MANEAL,ST3GAL6,EDEM3,EDEM2,MAN2B2,MAN1B1,ST6GALNAC5
GO: Molecular Function	GO:0005245	voltage-gated calcium channel activity		0.0001616	0.3641	0.001957	0.01624	13	44	CACNA1I,CACNA1H,CACNA1G,CACNA1A,CACNA1B,CACNA1C,CACNA2D1,CACNG8,CACNA2D3,GAS6,GRM7,IL1RAPL1,ITGAV
GO: Molecular Function	GO:0004653	polypeptide N-acetylgalactosaminyltransferase activity		0.0001969	0.4436	0.002359	0.01958	8	19	GALNT16,GALNT9,GALNT18,GALNT14,GALNT11,GALNT1,WBSCR17,GALNTL6
GO: Molecular Function	GO:0004890	GABA-A receptor activity		0.0001969	0.4436	0.002359	0.01958	8	19	GABRA1,GABRA2,GABRA3,GABRA5,GABRB1,GABRB3,GABRD,GABRG2
GO: Molecular Function	GO:0015144	carbohydrate transmembrane transporter activity		0.0002076	0.4676	0.002461	0.02042	13	45	SLC2A8,SLC45A1,SLC23A2,SLC35A5,SLC17A5,SLC35A1,SLC2A1,SLC2A3,SLC35A3,SLC2A6,SLC35A2,SLC45A4,M6PR
GO: Molecular Function	GO:1901476	carbohydrate transporter activity		0.0002076	0.4676	0.002461	0.02042	13	45	SLC2A8,SLC45A1,SLC23A2,SLC35A5,SLC17A5,SLC35A1,SLC2A1,SLC2A3,SLC35A3,SLC2A6,SLC35A2,SLC45A4,M6PR
GO: Molecular Function	GO:0090484	drug transporter activity		0.0002257	0.5086	0.002663	0.02209	10	29	ABCC1,ABCB1,ABCB4,ABCA8,SLC19A2,SLC15A2,SLC15A4,SLC19A1,SLC22A5,EBP
GO: Molecular Function	GO:0005388	calcium-transporting ATPase activity		0.0002282	0.5141	0.002664	0.0221	6	11	ATP2B1,ATP2B2,ATP2B3,ATP2B4,ATP2C2,ATP2C1
GO: Molecular Function	GO:0047372	acylglycerol lipase activity		0.0002282	0.5141	0.002664	0.0221	6	11	ABHD6,DAGLA,DAGLB,ABHD12,FAAH,ABHD2
GO: Molecular Function	GO:0004713	protein tyrosine kinase activity		0.0002383	0.5368	0.002767	0.02296	33	182	CLK4,MET,DYRK3,NRP2,NRP1,DDR1,NTRK2,NTRK3,PDGFRA,PDGFRB,NRG2,PTK7,HBEGF,EPHA10,EPHA3,EPHA4,EPHA5,EPHA7,EPHA8,EPHB1,EPHB2,EPHB3,EPHB6,RYK,EFEMP1,FGFR1,MERTK,NPTN,TYRO3,IGF1R,IGF2R,INSR,KIT
GO: Molecular Function	GO:0051082	unfolded protein binding		0.000245	0.552	0.002831	0.02349	22	103	NPM1,CALR,CANX,CLGN,CLN3,PPIB,TOMM20,SCG5,SCAP,SYVN1,DNAJB11,ERLEC1,AFG3L2,TAPBP,SIL1,HSP90B1,CALR3,HSPA5,ERO1B,UGGT1,LMAN1,LRPAP1
GO: Molecular Function	GO:0008188	neuropeptide receptor activity		0.0002643	0.5954	0.003038	0.0252	13	46	SORCS1,SORCS2,NPY1R,NPY2R,NPY5R,NTSR1,NPSR1,QRFPR,SORCS3,SSTR2,SSTR3,MCHR1,HCRTR1
GO: Molecular Function	GO:0015215	nucleotide transmembrane transporter activity		0.0003007	0.6776	0.003439	0.02854	8	20	SLC35B3,SLC35B1,SLC35E3,SLC35A1,SLC35A3,SLC35B4,SLC35A2,SLC35B2
GO: Molecular Function	GO:0051183	vitamin transporter activity		0.0003214	0.7241	0.003657	0.03034	9	25	ABCC1,SLC5A6,SLC52A2,SLC23A2,SLC19A2,SLC2A1,SLC2A3,PDPN,SLC19A1
GO: Molecular Function	GO:0042910	xenobiotic transporter activity		0.0003463	0.7802	0.00392	0.03253	5	8	ABCC1,ABCB1,ABCB4,ABCA8,SLC2A1
GO: Molecular Function	GO:0031402	sodium ion binding		0.0003778	0.8512	0.004248	0.03525	7	16	SLC24A3,ATP1A1,ATP1B1,SLC24A2,SCN1A,SCN2A,SCN8A
GO: Molecular Function	GO:0004904	interferon receptor activity		0.0003846	0.8665	0.004248	0.03525	4	5	IFNAR1,IFNAR2,IFNGR1,IFNGR2
GO: Molecular Function	GO:0015379	potassium:chloride symporter activity		0.0003846	0.8665	0.004248	0.03525	4	5	SLC12A5,SLC12A4,SLC12A7,SLC12A9
GO: Molecular Function	GO:0097109	neuroligin family protein binding		0.0003846	0.8665	0.004248	0.03525	4	5	SNTG2,NRXN3,NRXN1,NRXN2
GO: Molecular Function	GO:0022820	potassium ion symporter activity		0.0003846	0.8665	0.004248	0.03525	4	5	SLC12A5,SLC12A4,SLC12A7,SLC12A9
GO: Molecular Function	GO:0005451	monovalent cation:proton antiporter activity		0.0004195	0.945	0.004587	0.03806	6	12	SLC9A6,SLC9A1,SLC9A2,SLC9A5,SLC9A9,SLC9A8
GO: Molecular Function	GO:0031994	insulin-like growth factor I binding		0.0004195	0.945	0.004587	0.03806	6	12	IGF1R,IGFBP2,IGFBP5,INSR,ITGA6,ITGAV
GO: Molecular Function	GO:1905030	voltage-gated ion channel activity involved in regulation of postsynaptic membrane potential		0.0004453	1	0.004824	0.04002	8	21	HCN3,HCN1,SCN1A,SCN1B,SCN2A,SCN7A,SCN8A,SCN3B
GO: Molecular Function	GO:0005248	voltage-gated sodium channel activity		0.0004453	1	0.004824	0.04002	8	21	HCN3,HCN1,SCN1A,SCN1B,SCN2A,SCN7A,SCN8A,SCN3B
GO: Molecular Function	GO:0008374	O-acyltransferase activity		0.0004543	1	0.004897	0.04063	16	67	NAA10,DGAT1,LPCAT4,MBOAT7,LPCAT2,LPCAT1,AGPAT5,MBOAT2,DGAT2,GPAT4,TAZ,PLA2G15,CPT1C,PORCN,AGPAT3,AGPAT4
GO: Molecular Function	GO:0005272	sodium channel activity		0.0004813	1	0.005164	0.04285	11	37	HCN3,HCN1,NALCN,TRPM4,SCN1A,SCN1B,SCN2A,SCN7A,SCN8A,SCN3B,TRPM2
GO: Molecular Function	GO:0016782	transferase activity, transferring sulfur-containing groups		0.0005422	1	0.005765	0.04784	16	68	TPST2,TPST1,NDST2,CHST1,NDST3,CHST2,CHST10,HS2ST1,HS3ST1,DSEL,CHST12,WSCD1,LIAS,CHST8,CHST7,GAL3ST3
GO: Molecular Function	GO:0017171	serine hydrolase activity		0.0005425	1	0.005765	0.04784	40	245	ACHE,RHBDD2,NCEH1,MMP2,MMP14,MMP15,DPP10,PRSS12,MBTPS1,SEC11C,C1R,TMPRSS7,RHBDL1,FURIN,PCSK5,PCSK2,CTSC,TPP1,PLAT,RHBDD3,PLAU,DPP7,PAMR1,CPD,CPE,CTSA,CTSB,CTSK,CTSL,CTSS,MASP1,RELN,KLK6,DPP6,SCPEP1,PARL,PRSS23,SEC11A,KLK8,CPXM1
GO: Molecular Function	GO:0042605	peptide antigen binding		0.000557	1	0.005865	0.04866	10	32	DHCR24,TAP1,TAP2,TAPBP,SLC7A8,HFE,HLA-A,HLA-E,HLA-G,SLC7A5
GO: Molecular Function	GO:0015932	nucleobase-containing compound transmembrane transporter activity		0.000557	1	0.005865	0.04866	10	32	SIDT1,SLC35B3,SIDT2,SLC35B1,SLC35E3,SLC35A1,SLC35A3,SLC35B4,SLC35A2,SLC35B2
GO: Molecular Function	GO:0052859	glucan endo-1,4-beta-glucosidase activity		0.0006415	1	0.0066	0.05476	8	22	MAN2A2,MAN2B1,EDEM1,MANEAL,EDEM3,EDEM2,MAN2B2,MAN1B1
GO: Molecular Function	GO:0052769	beta-6-sulfate-N-acetylglucosaminidase activity		0.0006415	1	0.0066	0.05476	8	22	MAN2A2,MAN2B1,EDEM1,MANEAL,EDEM3,EDEM2,MAN2B2,MAN1B1
GO: Molecular Function	GO:0044653	dextrin alpha-glucosidase activity		0.0006415	1	0.0066	0.05476	8	22	MAN2A2,MAN2B1,EDEM1,MANEAL,EDEM3,EDEM2,MAN2B2,MAN1B1
GO: Molecular Function	GO:0052736	beta-glucanase activity		0.0006415	1	0.0066	0.05476	8	22	MAN2A2,MAN2B1,EDEM1,MANEAL,EDEM3,EDEM2,MAN2B2,MAN1B1
GO: Molecular Function	GO:0044654	starch alpha-glucosidase activity		0.0006415	1	0.0066	0.05476	8	22	MAN2A2,MAN2B1,EDEM1,MANEAL,EDEM3,EDEM2,MAN2B2,MAN1B1
GO: Molecular Function	GO:0051787	misfolded protein binding		0.0007161	1	0.006895	0.05721	6	13	DNAJB9,DNAJC10,CLU,EDEM1,DNAJC3,HSPA5
GO: Molecular Function	GO:0047144	2-acylglycerol-3-phosphate O-acyltransferase activity		0.0007177	1	0.006895	0.05721	5	9	LPCAT4,MBOAT7,LPCAT2,LPCAT1,MBOAT2
GO: Molecular Function	GO:0042500	aspartic endopeptidase activity, intramembrane cleaving		0.0007177	1	0.006895	0.05721	5	9	PSEN1,PSEN2,SPPL3,HM13,SPPL2B
GO: Molecular Function	GO:0103116	alpha-D-galactofuranose transporter activity		0.0007177	1	0.006895	0.05721	5	9	ATP1A1,ATP1A3,ATP13A5,ATP13A3,ATP13A1
GO: Molecular Function	GO:0042562	hormone binding		0.000718	1	0.006895	0.05721	18	83	MAS1,MC4R,ACVR1,ATP1A1,ATP1A3,TSPO,NPR2,CALR,CDH13,CRHBP,PTH1R,C2CD2L,ECE1,MCHR1,ABHD2,HCRTR1,IGF1R,INSR
GO: Molecular Function	GO:0016232	HNK-1 sulfotransferase activity		0.0007315	1	0.006895	0.05721	10	33	NDST2,CHST1,NDST3,CHST2,CHST10,HS2ST1,HS3ST1,CHST8,CHST7,GAL3ST3
GO: Molecular Function	GO:0018723	3-phenanthrol sulfotransferase activity		0.0007315	1	0.006895	0.05721	10	33	NDST2,CHST1,NDST3,CHST2,CHST10,HS2ST1,HS3ST1,CHST8,CHST7,GAL3ST3
GO: Molecular Function	GO:0018725	trans-3,4-dihydrodiolphenanthrene sulfotransferase activity		0.0007315	1	0.006895	0.05721	10	33	NDST2,CHST1,NDST3,CHST2,CHST10,HS2ST1,HS3ST1,CHST8,CHST7,GAL3ST3
GO: Molecular Function	GO:0004394	heparan sulfate 2-O-sulfotransferase activity		0.0007315	1	0.006895	0.05721	10	33	NDST2,CHST1,NDST3,CHST2,CHST10,HS2ST1,HS3ST1,CHST8,CHST7,GAL3ST3
GO: Molecular Function	GO:0051922	cholesterol sulfotransferase activity		0.0007315	1	0.006895	0.05721	10	33	NDST2,CHST1,NDST3,CHST2,CHST10,HS2ST1,HS3ST1,CHST8,CHST7,GAL3ST3
GO: Molecular Function	GO:0004027	alcohol sulfotransferase activity		0.0007315	1	0.006895	0.05721	10	33	NDST2,CHST1,NDST3,CHST2,CHST10,HS2ST1,HS3ST1,CHST8,CHST7,GAL3ST3
GO: Molecular Function	GO:0018727	2-phenanthrol sulfotransferase activity		0.0007315	1	0.006895	0.05721	10	33	NDST2,CHST1,NDST3,CHST2,CHST10,HS2ST1,HS3ST1,CHST8,CHST7,GAL3ST3
GO: Molecular Function	GO:0018724	4-phenanthrol sulfotransferase activity		0.0007315	1	0.006895	0.05721	10	33	NDST2,CHST1,NDST3,CHST2,CHST10,HS2ST1,HS3ST1,CHST8,CHST7,GAL3ST3
GO: Molecular Function	GO:0080131	hydroxyjasmonate sulfotransferase activity		0.0007315	1	0.006895	0.05721	10	33	NDST2,CHST1,NDST3,CHST2,CHST10,HS2ST1,HS3ST1,CHST8,CHST7,GAL3ST3
GO: Molecular Function	GO:0017095	heparan sulfate 6-O-sulfotransferase activity		0.0007315	1	0.006895	0.05721	10	33	NDST2,CHST1,NDST3,CHST2,CHST10,HS2ST1,HS3ST1,CHST8,CHST7,GAL3ST3
GO: Molecular Function	GO:0018726	9-phenanthrol sulfotransferase activity		0.0007315	1	0.006895	0.05721	10	33	NDST2,CHST1,NDST3,CHST2,CHST10,HS2ST1,HS3ST1,CHST8,CHST7,GAL3ST3
GO: Molecular Function	GO:0034930	1-hydroxypyrene sulfotransferase activity		0.0007315	1	0.006895	0.05721	10	33	NDST2,CHST1,NDST3,CHST2,CHST10,HS2ST1,HS3ST1,CHST8,CHST7,GAL3ST3
GO: Molecular Function	GO:0019111	phenanthrol sulfotransferase activity		0.0007315	1	0.006895	0.05721	10	33	NDST2,CHST1,NDST3,CHST2,CHST10,HS2ST1,HS3ST1,CHST8,CHST7,GAL3ST3
GO: Molecular Function	GO:0018721	trans-9R,10R-dihydrodiolphenanthrene sulfotransferase activity		0.0007315	1	0.006895	0.05721	10	33	NDST2,CHST1,NDST3,CHST2,CHST10,HS2ST1,HS3ST1,CHST8,CHST7,GAL3ST3
GO: Molecular Function	GO:0018722	1-phenanthrol sulfotransferase activity		0.0007315	1	0.006895	0.05721	10	33	NDST2,CHST1,NDST3,CHST2,CHST10,HS2ST1,HS3ST1,CHST8,CHST7,GAL3ST3
GO: Molecular Function	GO:0005520	insulin-like growth factor binding		0.0008347	1	0.007803	0.06475	9	28	CTGF,IGF1R,IGF2R,IGFBP2,IGFBP5,IGFBP7,INSR,ITGA6,ITGAV
GO: Molecular Function	GO:0008422	beta-glucosidase activity		0.0008347	1	0.007803	0.06475	9	28	MAN2A2,MAN2B1,EDEM1,MANEAL,EDEM3,EDEM2,MAN2B2,MAN1B1,LCT
GO: Molecular Function	GO:0008308	voltage-gated anion channel activity		0.0008855	1	0.008244	0.0684	7	18	CLCN2,CLCN3,CLCN4,CLCN6,CLCN7,GPR89B,VDAC3
GO: Molecular Function	GO:0015927	trehalase activity		0.0009019	1	0.008294	0.06882	8	23	MAN2A2,MAN2B1,EDEM1,MANEAL,EDEM3,EDEM2,MAN2B2,MAN1B1
GO: Molecular Function	GO:0043395	heparan sulfate proteoglycan binding		0.0009019	1	0.008294	0.06882	8	23	ATP1A3,SLIT2,LRRTM4,FST,SLIT1,GPC3,GPC1,AGRN
GO: Molecular Function	GO:0031420	alkali metal ion binding		0.0009019	1	0.008294	0.06882	8	23	SLC24A3,ATP1A1,ATP1B1,SLC24A2,SCN1A,SCN2A,SCN8A,KCNJ11
GO: Molecular Function	GO:0050698	proteoglycan sulfotransferase activity		0.0009485	1	0.008617	0.0715	10	34	NDST2,CHST1,NDST3,CHST2,CHST10,HS2ST1,HS3ST1,CHST8,CHST7,GAL3ST3
GO: Molecular Function	GO:0034483	heparan sulfate sulfotransferase activity		0.0009485	1	0.008617	0.0715	10	34	NDST2,CHST1,NDST3,CHST2,CHST10,HS2ST1,HS3ST1,CHST8,CHST7,GAL3ST3
GO: Molecular Function	GO:0001517	N-acetylglucosamine 6-O-sulfotransferase activity		0.0009485	1	0.008617	0.0715	10	34	NDST2,CHST1,NDST3,CHST2,CHST10,HS2ST1,HS3ST1,CHST8,CHST7,GAL3ST3
GO: Molecular Function	GO:0003976	UDP-N-acetylglucosamine-lysosomal-enzyme N-acetylglucosaminephosphotransferase activity		0.0009735	1	0.008635	0.07165	3	3	GNPTAB,DPAGT1,GNPTG
GO: Molecular Function	GO:0047192	1-alkylglycerophosphocholine O-acetyltransferase activity		0.0009735	1	0.008635	0.07165	3	3	LPCAT4,LPCAT2,LPCAT1
GO: Molecular Function	GO:0008449	N-acetylglucosamine-6-sulfatase activity		0.0009735	1	0.008635	0.07165	3	3	SULF2,SULF1,GNS
GO: Molecular Function	GO:0050508	glucuronosyl-N-acetylglucosaminyl-proteoglycan 4-alpha-N-acetylglucosaminyltransferase activity		0.0009735	1	0.008635	0.07165	3	3	EXT1,EXT2,EXTL1
GO: Molecular Function	GO:0015410	manganese-transporting ATPase activity		0.0009735	1	0.008635	0.07165	3	3	ATP2C2,ATP2C1,ATP13A1
GO: Molecular Function	GO:0008332	low voltage-gated calcium channel activity		0.0009735	1	0.008635	0.07165	3	3	CACNA1I,CACNA1H,CACNA1G
GO: Molecular Function	GO:0019198	transmembrane receptor protein phosphatase activity		0.0009958	1	0.008798	0.073	11	40	PTPRA,PTPRD,PTPRE,PTPRK,PTPRM,PTPRN2,PTPRO,PTPRR,PTPRS,PTPRU,PXYLP1
GO: Molecular Function	GO:0008503	benzodiazepine receptor activity		0.001064	1	0.009252	0.07677	4	6	TSPO,GABRA2,GABRA3,GABRG2
GO: Molecular Function	GO:0004169	dolichyl-phosphate-mannose-protein mannosyltransferase activity		0.001064	1	0.009252	0.07677	4	6	ALG5,POMT2,SDF2,POMT1
GO: Molecular Function	GO:0005225	volume-sensitive anion channel activity		0.001064	1	0.009252	0.07677	4	6	CLCN3,LRRC8D,LRRC8C,LRRC8A
GO: Molecular Function	GO:0015277	kainate selective glutamate receptor activity		0.001064	1	0.009252	0.07677	4	6	GRIK1,GRIK2,GRIK4,GRIK5
GO: Molecular Function	GO:1901682	sulfur compound transmembrane transporter activity		0.001109	1	0.009608	0.07972	9	29	ABCC1,CTNS,SLC26A8,SLC35B3,SLC19A2,SLC1A1,SLC1A4,SLC26A10,SLC35B2
GO: Molecular Function	GO:0004185	serine-type carboxypeptidase activity		0.001152	1	0.009908	0.08221	6	14	DPP7,CPD,CPE,CTSA,SCPEP1,CPXM1
GO: Molecular Function	GO:0005041	low-density lipoprotein receptor activity		0.001152	1	0.009908	0.08221	6	14	LRP1B,LRP12,LRP10,VLDLR,LDLR,LRP1
GO: Molecular Function	GO:0016667	oxidoreductase activity, acting on a sulfur group of donors		0.001161	1	0.009947	0.08254	13	53	PCYOX1L,DNAJC10,TMX3,GSTO1,QSOX1,QSOX2,CCS,TXNDC12,PCYOX1,SUMF1,PDIA3,ERO1B,TMX1
GO: Molecular Function	GO:0030276	clathrin binding		0.001171	1	0.009997	0.08295	15	66	SYT13,GPR107,CALY,SYT12,SYT16,SYT3,HMP19,NSG1,DNER,SYT11,SYT1,SYT4,SYT5,LDLR,CEMIP
GO: Molecular Function	GO:0005540	hyaluronic acid binding		0.001241	1	0.01054	0.0875	8	24	HYAL2,LAYN,CD44,SUSD5,VCAN,HAPLN4,TNFAIP6,CEMIP
GO: Molecular Function	GO:0015662	ATPase activity, coupled to transmembrane movement of ions, phosphorylative mechanism		0.001245	1	0.01054	0.0875	11	41	ATP1A1,ATP1A3,ATP1B1,ATP2B1,ATP2B2,ATP2B3,ATP2B4,ATP6V0B,ATP2C2,PCYOX1,ATP2C1
GO: Molecular Function	GO:0033130	acetylcholine receptor binding		0.001323	1	0.01116	0.0926	5	10	APP,ATP2B2,NRXN1,RIC3,RER1
GO: Molecular Function	GO:0015296	anion:cation symporter activity		0.001488	1	0.01251	0.1038	12	48	SLC12A5,SLC4A7,SLC13A5,SLC23A2,SLC6A15,SLC1A1,SLC6A7,SLC12A4,SLC20A1,SLC12A7,SLC12A9,SLC17A7
GO: Molecular Function	GO:0016853	isomerase activity		0.001495	1	0.01252	0.1039	29	170	BPGM,PPIL3,P4HB,TMX3,NAXE,DSE,PTGES,PPIB,PDIA4,GLCE,QSOX1,QSOX2,PIGK,TXNDC11,DSEL,PPIH,EBP,FKBPL,FKBP7,ERP44,EBPL,ERP29,TBXAS1,PDIA3,TMX4,FKBP9,ERO1B,TMX1,TXNDC5
GO: Molecular Function	GO:0008236	serine-type peptidase activity		0.00154	1	0.01274	0.1057	38	242	RHBDD2,MMP2,MMP14,MMP15,DPP10,PRSS12,MBTPS1,SEC11C,C1R,TMPRSS7,RHBDL1,FURIN,PCSK5,PCSK2,CTSC,TPP1,PLAT,RHBDD3,PLAU,DPP7,PAMR1,CPD,CPE,CTSA,CTSB,CTSK,CTSL,CTSS,MASP1,RELN,KLK6,DPP6,SCPEP1,PARL,PRSS23,SEC11A,KLK8,CPXM1
GO: Molecular Function	GO:0001537	N-acetylgalactosamine 4-O-sulfotransferase activity		0.001541	1	0.01274	0.1057	10	36	NDST2,CHST1,NDST3,CHST2,CHST10,HS2ST1,HS3ST1,CHST8,CHST7,GAL3ST3
GO: Molecular Function	GO:0050694	galactose 3-O-sulfotransferase activity		0.001541	1	0.01274	0.1057	10	36	NDST2,CHST1,NDST3,CHST2,CHST10,HS2ST1,HS3ST1,CHST8,CHST7,GAL3ST3
GO: Molecular Function	GO:0015026	coreceptor activity		0.001543	1	0.01274	0.1057	11	42	ACVR2A,NRP1,PTK7,NECTIN1,NECTIN2,RAMP1,RYK,ITGAV,RGMA,CXCR4,ACKR3
GO: Molecular Function	GO:0015238	drug transmembrane transporter activity		0.001673	1	0.01376	0.1142	8	25	ABCC1,ABCB1,ABCB4,ABCA8,SLC19A2,SLC15A4,SLC22A5,EBP
GO: Molecular Function	GO:0042887	amide transmembrane transporter activity		0.001818	1	0.01479	0.1227	7	20	ABCC1,SLC15A2,SLC15A4,TAP1,TAP2,TAPBP,ABCB9
GO: Molecular Function	GO:0015299	solute:proton antiporter activity		0.001818	1	0.01479	0.1227	7	20	TMCO3,SLC9A6,SLC9A1,SLC9A2,SLC9A5,SLC9A9,SLC9A8
GO: Molecular Function	GO:0005112	Notch binding		0.001818	1	0.01479	0.1227	7	20	JAG1,EGFL7,GALNT11,DNER,CNTN6,ADAM17,JAG2
GO: Molecular Function	GO:0042577	lipid phosphatase activity		0.002235	1	0.01804	0.1497	5	11	PLPPR1,PLPPR4,PLPPR3,PLPP7,PLPPR2
GO: Molecular Function	GO:0043121	neurotrophin binding		0.002235	1	0.01804	0.1497	5	11	NTRK2,NTRK3,FURIN,SORT1,FSTL4
GO: Molecular Function	GO:0005384	manganese ion transmembrane transporter activity		0.002294	1	0.0182	0.151	4	7	ATP2C2,ATP2C1,TRPM2,ATP13A1
GO: Molecular Function	GO:0008559	xenobiotic-transporting ATPase activity		0.002294	1	0.0182	0.151	4	7	ABCC1,ABCB1,ABCB4,ABCA8
GO: Molecular Function	GO:0046977	TAP binding		0.002294	1	0.0182	0.151	4	7	TAP1,TAP2,TAPBP,HLA-A
GO: Molecular Function	GO:0017002	activin-activated receptor activity		0.002294	1	0.0182	0.151	4	7	ACVR1,ACVR1B,ACVR2A,ACVR2B
GO: Molecular Function	GO:0090482	vitamin transmembrane transporter activity		0.002294	1	0.0182	0.151	4	7	ABCC1,SLC5A6,SLC23A2,SLC19A2
GO: Molecular Function	GO:0005246	calcium channel regulator activity		0.002402	1	0.01899	0.1576	10	38	STIM2,NPY,NPY2R,NRXN3,NRXN1,NRXN2,TSPAN13,CACNA2D3,GRM2,GRM7
GO: Molecular Function	GO:0016409	palmitoyltransferase activity		0.002477	1	0.01951	0.1619	14	64	NAA10,ZDHHC8,ZDHHC13,MBOAT7,ZDHHC5,ZDHHC9,SPTLC1,ZDHHC16,MBOAT2,ZDHHC17,ZDHHC6,PLA2G15,CPT1C,PORCN
GO: Molecular Function	GO:0015145	monosaccharide transmembrane transporter activity		0.002505	1	0.01953	0.162	7	21	SLC2A8,SLC45A1,SLC23A2,SLC2A1,SLC2A3,SLC2A6,M6PR
GO: Molecular Function	GO:0042288	MHC class I protein binding		0.002505	1	0.01953	0.162	7	21	DERL1,BCAP31,TAP1,TAP2,TAPBP,PDIA3,HLA-E
GO: Molecular Function	GO:0031418	L-ascorbic acid binding		0.002505	1	0.01953	0.162	7	21	P4HA1,PAM,PLOD1,PLOD2,P4HTM,OGFOD2,OGFOD3
GO: Molecular Function	GO:0001618	virus receptor activity		0.002537	1	0.01971	0.1635	15	71	MRC1,HYAL2,NCAM1,SCARB2,XPR1,CXADR,CD55,DAG1,NECTIN1,NECTIN2,SLC52A2,TYRO3,ITGAV,CXCR4,LDLR
GO: Molecular Function	GO:0004012	phospholipid-translocating ATPase activity		0.002599	1	0.02012	0.167	6	16	ABCB4,ATP9A,ATP9B,ATP8A1,ATP8A2,ATP11B
GO: Molecular Function	GO:0017046	peptide hormone binding		0.002804	1	0.02163	0.1795	11	45	MAS1,MC4R,ACVR1,NPR2,CRHBP,PTH1R,C2CD2L,ECE1,HCRTR1,IGF1R,INSR
GO: Molecular Function	GO:0015175	neutral amino acid transmembrane transporter activity		0.00301	1	0.02307	0.1914	9	33	SERINC1,SLC6A15,SLC1A1,SLC1A4,SLC3A2,SLC6A7,SERINC3,SLC7A8,SLC7A5
GO: Molecular Function	GO:0001968	fibronectin binding		0.00301	1	0.02307	0.1914	9	33	MMP2,CTGF,CTSK,CTSL,CTSS,SFRP2,IGFBP5,ITGA3,ITGAV
GO: Molecular Function	GO:0001601	peptide YY receptor activity		0.003244	1	0.02412	0.2001	3	4	NPY1R,NPY2R,NPY5R
GO: Molecular Function	GO:0050510	N-acetylgalactosaminyl-proteoglycan 3-beta-glucuronosyltransferase activity		0.003244	1	0.02412	0.2001	3	4	CHPF2,CHPF,CHSY3
GO: Molecular Function	GO:0046978	TAP1 binding		0.003244	1	0.02412	0.2001	3	4	TAP1,TAP2,TAPBP
GO: Molecular Function	GO:0034040	lipid-transporting ATPase activity		0.003244	1	0.02412	0.2001	3	4	ABCC1,ABCG1,ABCG4
GO: Molecular Function	GO:0005030	neurotrophin receptor activity		0.003244	1	0.02412	0.2001	3	4	NTRK2,NTRK3,SORT1
GO: Molecular Function	GO:0016972	thiol oxidase activity		0.003244	1	0.02412	0.2001	3	4	TMX3,QSOX1,QSOX2
GO: Molecular Function	GO:0004971	AMPA glutamate receptor activity		0.003244	1	0.02412	0.2001	3	4	GRIA1,GRIA3,GRIA4
GO: Molecular Function	GO:0032051	clathrin light chain binding		0.003244	1	0.02412	0.2001	3	4	CALY,HMP19,NSG1
GO: Molecular Function	GO:0046979	TAP2 binding		0.003244	1	0.02412	0.2001	3	4	TAP1,TAP2,TAPBP
GO: Molecular Function	GO:1990381	ubiquitin-specific protease binding		0.003531	1	0.026	0.2157	5	12	AMFR,DERL1,SYVN1,SELENOS,PARK7
GO: Molecular Function	GO:0015279	store-operated calcium channel activity		0.003531	1	0.026	0.2157	5	12	STIM2,ORAI2,ORAI3,TRPC1,TRPC4
GO: Molecular Function	GO:0005247	voltage-gated chloride channel activity		0.003531	1	0.026	0.2157	5	12	CLCN2,CLCN3,CLCN4,CLCN6,CLCN7
GO: Molecular Function	GO:0048018	receptor agonist activity		0.003695	1	0.02703	0.2243	6	17	WNT4,SFRP2,GAS6,WNT2,WNT5A,WNT7B
GO: Molecular Function	GO:0008484	sulfuric ester hydrolase activity		0.003695	1	0.02703	0.2243	6	17	ARSA,ARSK,GALNS,SULF2,SULF1,GNS
GO: Molecular Function	GO:0016160	amylase activity		0.003712	1	0.02706	0.2245	8	28	MAN2A2,MAN2B1,EDEM1,MANEAL,EDEM3,EDEM2,MAN2B2,MAN1B1
GO: Molecular Function	GO:1990459	transferrin receptor binding		0.004241	1	0.03033	0.2517	4	8	CD81,TF,HFE,RGMA
GO: Molecular Function	GO:0015377	cation:chloride symporter activity		0.004241	1	0.03033	0.2517	4	8	SLC12A5,SLC12A4,SLC12A7,SLC12A9
GO: Molecular Function	GO:0004571	mannosyl-oligosaccharide 1,2-alpha-mannosidase activity		0.004241	1	0.03033	0.2517	4	8	EDEM1,EDEM3,EDEM2,MAN1B1
GO: Molecular Function	GO:0031995	insulin-like growth factor II binding		0.004241	1	0.03033	0.2517	4	8	IGF2R,IGFBP2,IGFBP5,INSR
GO: Molecular Function	GO:0034235	GPI anchor binding		0.004241	1	0.03033	0.2517	4	8	GPAA1,PIGK,PIGU,THY1
GO: Molecular Function	GO:0055056	D-glucose transmembrane transporter activity		0.004241	1	0.03033	0.2517	4	8	SLC2A8,SLC2A1,SLC2A3,SLC2A6
GO: Molecular Function	GO:0019707	protein-cysteine S-acyltransferase activity		0.004289	1	0.03058	0.2537	12	54	NAA10,ZDHHC8,ZDHHC13,MBOAT7,ZDHHC5,ZDHHC9,ZDHHC16,MBOAT2,ZDHHC17,ZDHHC6,PLA2G15,PORCN
GO: Molecular Function	GO:0003923	GPI-anchor transamidase activity		0.004631	1	0.03291	0.2731	9	35	NDST2,GPAA1,NDST3,PIGK,PIGU,PIGT,HINT2,ABHD13,ABHD16A
GO: Molecular Function	GO:0048185	activin binding		0.00529	1	0.03748	0.311	5	13	ACVR1,ACVR1B,ACVR2A,ACVR2B,FST
GO: Molecular Function	GO:1901681	sulfur compound binding		0.005413	1	0.03823	0.3172	38	260	APLP2,APP,RSPO2,ATP1A3,NCAM1,NRP2,NRP1,NELL1,BMP4,BMP7,NELL2,CD34,SLIT2,PTGES,CTGF,NDNF,HBEGF,TENM1,LRRTM4,CHST12,FGFR1,FST,FN1,SLIT1,SLIT3,SMOC2,GPC3,GNS,GPC1,GSTP1,RSPO3,THBS2,AGRN,INSR,GAL3ST3,LPL,LRPAP1,LTC4S
GO: Molecular Function	GO:0005242	inward rectifier potassium channel activity		0.00578	1	0.04069	0.3377	7	24	KCNH7,ABCC8,KCNQ5,KCNH2,KCNJ4,KCNJ9,KCNJ11
GO: Molecular Function	GO:0005227	calcium activated cation channel activity		0.005886	1	0.04131	0.3428	8	30	KCNT1,TMEM38A,TRPM4,ANO10,KCNT2,KCNN1,KCNN2,TMEM63C
GO: Molecular Function	GO:0070008	serine-type exopeptidase activity		0.006859	1	0.0477	0.3958	6	19	DPP7,CPD,CPE,CTSA,SCPEP1,CPXM1
GO: Molecular Function	GO:0015149	hexose transmembrane transporter activity		0.006859	1	0.0477	0.3958	6	19	SLC2A8,SLC45A1,SLC2A1,SLC2A3,SLC2A6,M6PR
GO: Molecular Function	GO:0030228	lipoprotein particle receptor activity		0.006859	1	0.0477	0.3958	6	19	LRP1B,LRP12,LRP10,VLDLR,LDLR,LRP1
GO: Molecular Function	GO:0016247	channel regulator activity		0.006966	1	0.04829	0.4007	23	140	AMIGO1,STIM2,DPP10,ATP2B4,FXYD5,NPY,NPY2R,NRXN3,NRXN1,NRXN2,STOML1,DPP6,CACNG8,SCN1B,KCNV1,TSPAN13,CACNA2D3,SCN3B,GRM2,GRM7,SNF8,KCNS1,KCNS3
GO: Molecular Function	GO:0017169	CDP-alcohol phosphatidyltransferase activity		0.007059	1	0.04879	0.4048	4	9	CEPT1,CDIPT,PTDSS2,CHPT1
Category	ID	Name	Source	p-value	q-value Bonferroni	q-value FDR B&H	q-value FDR B&Y	Hit Count in Query List	Hit Count in Genome	Hit in Query List
GO: Biological Process	GO:0006811	ion transport		1.377e-43	1.122e-39	1.122e-39	1.075e-38	333	1627	ABCA2,KCNH7,AQP11,SLC24A3,ADCYAP1R1,AMIGO1,SLC12A5,ADRB1,SERINC1,NLGN2,KCNT1,ABCC1,STIM2,FAM26E,DPP10,OSTM1,PEX3,HCN3,SLC7A14,ASPH,SLC17A8,ATP1A1,ATP1A3,ATP1B1,ATP2B1,ATP2B2,ATP2B3,ATP2B4,ATP6V0B,ATP6V0A1,ATP6AP1,FXYD6,FXYD5,NDUFA4,BDNF,BMP4,BSG,SLC5A6,TSPO,CACNA1I,CACNA1H,CACNA1G,NIPA1,NMB,NPY,CA4,CACNA1A,CACNA1B,SFXN4,CACNA1C,CACNA2D1,NPY2R,NPY5R,CALCA,ATP6V0E1,HCN1,NTRK2,SLC25A14,NTSR1,ATP13A5…
GO: Biological Process	GO:0055085	transmembrane transport		4.609e-40	3.755e-36	1.878e-36	1.799e-35	287	1356	ABCA2,ABCA3,KCNH7,SLC24A3,AMIGO1,SLC12A5,ADRB1,NLGN2,KCNT1,ABCC1,STIM2,FAM26E,DPP10,OSTM1,PEX3,HCN3,SLC7A14,TIMM21,ASPH,SLC17A8,ATP1A1,ATP1A3,ATP1B1,ATP2B1,ATP2B2,ATP2B3,ATP2B4,ATP6V0B,ATP6V0A1,ATP6AP1,FXYD6,FXYD5,NDUFA4,BMP4,SLC5A6,CACNA1I,CACNA1H,CACNA1G,NIPA1,CACNA1A,CACNA1B,SFXN4,CACNA1C,CACNA2D1,ATP6V0E1,HCN1,NTSR1,ATP13A5,OPRL1,P2RX4,SLC16A3,SLC33A1,PDGFRB,CBARP,KCNB2,CHRNA5,CHRNB2,ABCB1,AB…
GO: Biological Process	GO:0007416	synapse assembly		7.466e-38	6.083e-34	2.028e-34	1.943e-33	76	149	ACHE,SLITRK1,AMIGO1,NLGN2,APP,PCDHB16,ADGRB1,ADGRB2,ADGRB3,BDNF,SDK1,CACNA1A,NRCAM,NTRK2,NTRK3,ADGRE5,CDH2,CHRNB2,NLGN3,NRXN3,NRXN1,NRXN2,SDK2,LRRN3,LRRTM2,SLITRK5,RELN,CLSTN3,PCDHB5,SPOCK2,PTPRD,NECTIN1,DSCAM,ROBO2,EPHA7,EPHB1,EPHB2,EPHB3,RYK,LRRTM4,ADGRL1,LINGO2,NLGN1,CLSTN1,NPTN,SLIT1,DNER,CLSTN2,KIRREL3,GLRA2,ADGRL2,ADGRL3,GPM6A,PCDHB14,PCDHB13,PCDHB11,PCDHB10,PCDHB9,PCDHB4,PCDHB3,GRIN1,IL1RA…
GO: Biological Process	GO:0034220	ion transmembrane transport		1.138e-34	9.274e-31	2.319e-31	2.222e-30	233	1064	KCNH7,SLC24A3,AMIGO1,SLC12A5,ADRB1,NLGN2,KCNT1,ABCC1,STIM2,FAM26E,DPP10,OSTM1,PEX3,HCN3,SLC7A14,ASPH,SLC17A8,ATP1A1,ATP1A3,ATP1B1,ATP2B1,ATP2B2,ATP2B3,ATP2B4,ATP6V0B,ATP6V0A1,ATP6AP1,FXYD6,FXYD5,NDUFA4,BMP4,SLC5A6,CACNA1I,CACNA1H,CACNA1G,CACNA1A,CACNA1B,SFXN4,CACNA1C,CACNA2D1,ATP6V0E1,HCN1,NTSR1,ATP13A5,OPRL1,P2RX4,SLC16A3,PDGFRB,CBARP,KCNB2,CHRNA5,CHRNB2,NLGN3,CLCN2,CLCN3,CLCN4,CLCN6,CLCN7,NRXN1…
GO: Biological Process	GO:0009100	glycoprotein metabolic process		6.049e-32	4.928e-28	9.856e-29	9.445e-28	123	407	MAN2A2,MAN2A1,MANBA,GALNT16,MGAT2,MGAT5,MCFD2,NDST2,C1GALT1C1,B4GALT4,B3GALT4,B3GALNT1,B3GALT2,DPY19L3,ST3GAL5,STT3B,LARGE1,B4GALT5,NDST3,OSTC,ALG5,ALG8,CHPF2,ST8SIA5,ALG6,MGAT4C,ITM2A,ALG12,DSE,POMT2,FKRP,GNPTAB,TMEM59,GLCE,HS2ST1,GALNT9,VCAN,EDEM1,PSEN1,DAD1,DAG1,SPOCK2,GALNT18,FBXO6,CHPF,DPAGT1,GALNT14,NDNF,SRD5A3,HBEGF,SLC35C2,ALG9,CHSY3,DSEL,RAMP1,RPN1,RPN2,EXT1,EXT2,EXTL1,EXTL2,TMEM5,EXTL3,…
GO: Biological Process	GO:0009101	glycoprotein biosynthetic process		2.763e-30	2.251e-26	3.752e-27	3.595e-26	112	361	MAN2A2,MAN2A1,GALNT16,MGAT2,MGAT5,MCFD2,NDST2,C1GALT1C1,B4GALT4,B3GALT4,B3GALNT1,B3GALT2,DPY19L3,ST3GAL5,STT3B,LARGE1,B4GALT5,NDST3,OSTC,ALG5,ALG8,CHPF2,ST8SIA5,ALG6,MGAT4C,ITM2A,ALG12,DSE,POMT2,FKRP,GNPTAB,TMEM59,GLCE,HS2ST1,GALNT9,VCAN,EDEM1,PSEN1,DAD1,DAG1,GALNT18,CHPF,DPAGT1,GALNT14,SRD5A3,HBEGF,SLC35C2,ALG9,CHSY3,DSEL,RAMP1,RPN1,RPN2,EXT1,EXT2,EXTL1,EXTL2,TMEM5,EXTL3,MAGT1,CSGALNACT2,ST3GAL6…
GO: Biological Process	GO:0050808	synapse organization		9.405e-30	7.662e-26	1.095e-26	1.049e-25	92	261	ACHE,SLITRK1,AMIGO1,NLGN2,APP,PCDHB16,ATP2B2,ADGRB1,ADGRB2,ADGRB3,BDNF,SDK1,CACNA1A,CALCA,NRCAM,NTRK2,NTRK3,ADGRE5,CDH2,CHRNB2,NLGN3,NRXN3,NRXN1,NRXN2,SDK2,LRRN3,LRRTM2,SLITRK5,SEMA3E,RELN,CLSTN3,PCDHB5,SPOCK2,PTPRD,NECTIN1,DSCAM,SEZ6L2,ROBO2,SEZ6,EPHA7,EPHB1,EPHB2,EPHB3,RYK,LRRTM4,SLC9A6,ADGRL1,LINGO2,NLGN1,CLSTN1,NPTN,SLIT1,DNER,NFASC,CLSTN2,KIRREL3,GLRA2,GLRB,AFG3L2,ADGRL2,ADGRL3,GPM6A,PCDHB14…
GO: Biological Process	GO:0006812	cation transport		4.165e-27	3.394e-23	4.242e-24	4.065e-23	222	1110	KCNH7,SLC24A3,ADCYAP1R1,AMIGO1,SLC12A5,ADRB1,SERINC1,KCNT1,ABCC1,STIM2,FAM26E,DPP10,HCN3,ASPH,SLC17A8,ATP1A1,ATP1A3,ATP1B1,ATP2B1,ATP2B2,ATP2B3,ATP2B4,ATP6V0B,ATP6V0A1,ATP6AP1,FXYD5,NDUFA4,BMP4,SLC5A6,TSPO,CACNA1I,CACNA1H,CACNA1G,NIPA1,NPY,CACNA1A,CACNA1B,CACNA1C,CACNA2D1,NPY2R,CALCA,ATP6V0E1,HCN1,SLC25A14,NTSR1,ATP13A5,CCKBR,OPRL1,P2RX4,SLC33A1,PDGFRB,CBARP,KCNB2,CHRNA5,CHRNB2,ABCB1,SELENOK,NALC…
GO: Biological Process	GO:1901135	carbohydrate derivative metabolic process		1.197e-26	9.753e-23	1.084e-23	1.038e-22	248	1309	MAN2A2,MAN2A1,MANBA,MC4R,GALNT16,ADCY2,ADCY8,ADCYAP1R1,ADORA2B,MGAT2,MGAT5,ADRB1,SERINC1,MCFD2,NDST2,CHST1,C1GALT1C1,ARSA,ASAH1,MT-ND5,CHID1,ATP1B1,ATP2B2,HYAL2,B4GALT4,B3GALT4,B3GALNT1,B3GALT2,DPY19L3,ATP6V0A1,GPAA1,NAGA,NAGLU,LPCAT4,NDUFA4,NDUFA8,NDUFAB1,NDUFB8,BDNF,NDUFS4,NEU1,BPGM,ST3GAL5,TSPO,NPPC,NPR2,NPY2R,CALCA,NUCB2,OMD,STT3B,OPRL1,CD44,PCMT1,LARGE1,PDGFRB,B4GALT5,NDST3,OSTC,PIGC,PIGH,CL…
GO: Biological Process	GO:1901137	carbohydrate derivative biosynthetic process		3.016e-26	2.457e-22	2.457e-23	2.355e-22	173	782	MAN2A2,MAN2A1,MC4R,GALNT16,ADCY2,ADCY8,ADCYAP1R1,ADORA2B,MGAT2,MGAT5,ADRB1,MCFD2,NDST2,CHST1,C1GALT1C1,B4GALT4,B3GALT4,B3GALNT1,B3GALT2,DPY19L3,ATP6V0A1,GPAA1,ST3GAL5,NPPC,NPR2,NPY2R,CALCA,NUCB2,OMD,STT3B,OPRL1,LARGE1,PDGFRB,B4GALT5,NDST3,OSTC,PIGC,PIGH,PDCL3,ALG5,ALG8,CHPF2,ST8SIA5,CHST2,ALG6,MGAT4C,ITM2A,ALG12,DSE,POMT2,FKRP,GNPTAB,TMEM59,GABBR2,GLCE,HS2ST1,GALNT9,VCAN,SDC3,EDEM1,PSEN1,PTDSS1,D…
GO: Biological Process	GO:0051963	regulation of synapse assembly		4.334e-26	3.531e-22	3.21e-23	3.076e-22	48	88	SLITRK1,AMIGO1,NLGN2,ADGRB1,ADGRB2,ADGRB3,BDNF,NTRK2,NTRK3,ADGRE5,CHRNB2,NLGN3,NRXN3,NRXN1,LRRN3,LRRTM2,SLITRK5,CLSTN3,NECTIN1,ROBO2,EPHA7,EPHB1,EPHB2,EPHB3,LRRTM4,ADGRL1,LINGO2,NLGN1,CLSTN1,SLIT1,CLSTN2,ADGRL2,ADGRL3,GRIN1,THBS2,AGRN,TPBG,LRTM2,FLRT3,FLRT2,FLRT1,WNT5A,IL1RAP,LRRTM3,LRRTM1,AMIGO2,SLITRK4,LRRC4B
GO: Biological Process	GO:0007409	axonogenesis		7.725e-25	6.293e-21	5.244e-22	5.026e-21	123	478	MAG,ACHE,MATN2,TENM2,DSCAML1,SLITRK1,AMIGO1,UNC5A,LRFN2,ISLR2,LRFN1,SEMA7A,LRRC4C,APP,UNC5C,ADGRB1,NCAM1,NDN,BDNF,NRP2,NRP1,BMP7,NEO1,NFIB,CACNA1A,CNTN4,NPTX1,NRCAM,NTRK2,NTRK3,OMD,OMG,CCK,CDH2,CDH11,NOG,CHRNB2,SLIT2,NLGN3,LRFN4,NRXN3,NRXN1,PLXNA1,PLXNA2,TSKU,PLXNA4,SLITRK5,SEMA3E,BOC,RELN,PSEN1,LRFN3,DAG1,SEMA4C,PTPRA,PLPPR4,PTPRM,PTPRO,NECTIN1,TCTN1,DSCAM,ATL1,EFNA1,EFNA2,MEGF8,PLXNC1,ROBO1,ROB…
GO: Biological Process	GO:0061564	axon development		9.341e-25	7.61e-21	5.854e-22	5.61e-21	129	516	MAG,ACHE,MATN2,TENM2,DSCAML1,SLITRK1,AMIGO1,UNC5A,LRFN2,MMP2,ISLR2,LRFN1,SEMA7A,LRRC4C,APP,UNC5C,ADGRB1,NCAM1,NDN,BDNF,NRP2,NRP1,BMP7,NEO1,NFIB,TSPO,CACNA1A,CNTN4,DDR1,NPTX1,NRCAM,NTRK2,NTRK3,OMD,OMG,CCK,CDH2,CDH11,NOG,CHRNB2,SLIT2,NLGN3,LRFN4,NRXN3,NRXN1,PLXNA1,PLXNA2,TSKU,PLXNA4,SLITRK5,SEMA3E,BOC,RELN,PSEN1,LRFN3,DAG1,SEMA4C,PTPRA,PLPPR4,PTPRM,PTPRO,NECTIN1,TCTN1,DSCAM,CRTAC1,ATL1,EFNA1,EFNA2,…
GO: Biological Process	GO:0051965	positive regulation of synapse assembly		1.877e-24	1.529e-20	1.092e-21	1.047e-20	41	69	SLITRK1,AMIGO1,NLGN2,ADGRB1,ADGRB2,ADGRB3,BDNF,NTRK2,NTRK3,ADGRE5,NLGN3,NRXN3,NRXN1,LRRN3,LRRTM2,SLITRK5,CLSTN3,EPHB1,EPHB2,EPHB3,LRRTM4,ADGRL1,LINGO2,NLGN1,CLSTN1,CLSTN2,ADGRL2,ADGRL3,THBS2,AGRN,TPBG,LRTM2,FLRT3,FLRT2,FLRT1,IL1RAP,LRRTM3,LRRTM1,AMIGO2,SLITRK4,LRRC4B
GO: Biological Process	GO:0043413	macromolecule glycosylation		2.441e-24	1.988e-20	1.235e-21	1.184e-20	88	281	MAN2A2,MAN2A1,GALNT16,MGAT2,MGAT5,MCFD2,C1GALT1C1,B4GALT4,B3GALT4,B3GALNT1,B3GALT2,DPY19L3,ST3GAL5,STT3B,LARGE1,B4GALT5,OSTC,ALG5,ALG8,ST8SIA5,ALG6,MGAT4C,ALG12,POMT2,FKRP,GNPTAB,TMEM59,GALNT9,EDEM1,PSEN1,DAD1,DAG1,GALNT18,DPAGT1,GALNT14,SRD5A3,SLC35C2,ALG9,RAMP1,RPN1,RPN2,EXT1,EXT2,EXTL1,TMEM5,MAGT1,ST3GAL6,SPON1,POMK,SDF2,NUDT14,POMGNT1,ST3GAL3,POMT1,EDEM3,GALNT11,EDEM2,UGGT2,SYVN1,FUT8,EOGT,GA…
GO: Biological Process	GO:0006486	protein glycosylation		2.441e-24	1.988e-20	1.235e-21	1.184e-20	88	281	MAN2A2,MAN2A1,GALNT16,MGAT2,MGAT5,MCFD2,C1GALT1C1,B4GALT4,B3GALT4,B3GALNT1,B3GALT2,DPY19L3,ST3GAL5,STT3B,LARGE1,B4GALT5,OSTC,ALG5,ALG8,ST8SIA5,ALG6,MGAT4C,ALG12,POMT2,FKRP,GNPTAB,TMEM59,GALNT9,EDEM1,PSEN1,DAD1,DAG1,GALNT18,DPAGT1,GALNT14,SRD5A3,SLC35C2,ALG9,RAMP1,RPN1,RPN2,EXT1,EXT2,EXTL1,TMEM5,MAGT1,ST3GAL6,SPON1,POMK,SDF2,NUDT14,POMGNT1,ST3GAL3,POMT1,EDEM3,GALNT11,EDEM2,UGGT2,SYVN1,FUT8,EOGT,GA…
GO: Biological Process	GO:0070085	glycosylation		2.578e-24	2.1e-20	1.235e-21	1.184e-20	90	292	MAN2A2,MAN2A1,GALNT16,MGAT2,MGAT5,MCFD2,C1GALT1C1,B4GALT4,B3GALT4,B3GALNT1,B3GALT2,DPY19L3,CDS2,ST3GAL5,STT3B,LARGE1,B4GALT5,OSTC,CLN5,ALG5,ALG8,ST8SIA5,ALG6,MGAT4C,ALG12,POMT2,FKRP,GNPTAB,TMEM59,GALNT9,EDEM1,PSEN1,DAD1,DAG1,GALNT18,DPAGT1,GALNT14,SRD5A3,SLC35C2,ALG9,RAMP1,RPN1,RPN2,EXT1,EXT2,EXTL1,TMEM5,MAGT1,ST3GAL6,SPON1,POMK,SDF2,NUDT14,POMGNT1,ST3GAL3,POMT1,EDEM3,GALNT11,EDEM2,UGGT2,SYVN1,FU…
GO: Biological Process	GO:0030001	metal ion transport		2.273e-23	1.852e-19	1.029e-20	9.858e-20	177	855	KCNH7,SLC24A3,ADCYAP1R1,AMIGO1,SLC12A5,ADRB1,KCNT1,STIM2,DPP10,HCN3,ASPH,SLC17A8,ATP1A1,ATP1A3,ATP1B1,ATP2B1,ATP2B2,ATP2B3,ATP2B4,ATP6V0B,ATP6V0A1,ATP6AP1,FXYD5,BMP4,SLC5A6,TSPO,CACNA1I,CACNA1H,CACNA1G,NIPA1,NPY,CACNA1A,CACNA1B,CACNA1C,CACNA2D1,CALCA,ATP6V0E1,HCN1,NTSR1,OPRL1,P2RX4,PDGFRB,CBARP,KCNB2,CHRNB2,SELENOK,NALCN,SLC24A2,STOML1,TMEM38A,SLC39A6,GSTO1,CNGA4,CNTN1,SLC4A7,SLC39A3,NDFIP2,CP,SL…
GO: Biological Process	GO:0048812	neuron projection morphogenesis		3.548e-23	2.891e-19	1.521e-20	1.458e-19	144	633	MAG,ACHE,MATN2,TENM2,DSCAML1,SLITRK1,AMIGO1,UNC5A,MET,LRFN2,KIDINS220,ISLR2,LRFN1,SEMA7A,CNTNAP1,LRRC4C,APP,UNC5C,CAPRIN2,ADGRB1,ADGRB3,NCAM1,NDN,BDNF,NRP2,NRP1,BMP7,NEO1,NFIB,CACNA1A,CNTN4,DDR1,NPTX1,NRCAM,NTRK2,NTRK3,OMD,OMG,CCK,CDH2,CDH11,NOG,CHRNB2,SLIT2,NLGN3,LRFN4,NRXN3,NRXN1,CLU,PLXNA1,PLXNA2,TSKU,TMEM106B,PLXNA4,SLITRK5,SEMA3E,BOC,RELN,PSEN1,LRFN3,DAG1,SEMA4C,PTPRA,PTPRD,PLPPR4,PTPRM,PTPR…
GO: Biological Process	GO:0048667	cell morphogenesis involved in neuron differentiation		2.824e-22	2.3e-18	1.057e-19	1.013e-18	136	593	MAG,ACHE,MATN2,TENM2,DSCAML1,SLITRK1,AMIGO1,UNC5A,MET,LRFN2,KIDINS220,ISLR2,LRFN1,SEMA7A,LRRC4C,APP,UNC5C,CAPRIN2,ATP2B2,ADGRB1,ADGRB3,NCAM1,NDN,BDNF,NRP2,NRP1,BMP7,NEO1,NFIB,CACNA1A,CNTN4,NPTX1,NRCAM,NTRK2,NTRK3,OMD,OMG,CCK,CDH2,CDH11,NOG,CHRNB2,SLIT2,NLGN3,LRFN4,NRXN3,NRXN1,PLXNA1,PLXNA2,TSKU,TMEM106B,PLXNA4,SLITRK5,LHFPL5,SEMA3E,BOC,RELN,PSEN1,LRFN3,DAG1,SEMA4C,PTPRA,PTPRD,PLPPR4,PTPRM,PTPRO,N…
GO: Biological Process	GO:0099537	trans-synaptic signaling		2.985e-22	2.432e-18	1.057e-19	1.013e-18	149	680	ACHE,ABHD6,SLC12A5,MET,LRFN2,ADRB1,NLGN2,SYT13,LRFN1,PCDHB16,ATP2B2,NCAM1,BDNF,TSPO,CACNA1G,NPY,CACNA1A,CACNA1B,CACNA1C,CNTN4,NPTX1,NPTX2,NPY2R,NPY5R,NTRK2,NTSR1,CAV2,CCKBR,OPRL1,P2RX4,SYNGR1,PCDH8,CDH8,CHRM1,CHRM3,CHRM4,CHRNA5,CHRNB2,NLGN3,LRFN4,NRXN3,CLCN3,NRXN1,NRXN2,SLC24A2,PLAT,PNOC,GABBR2,CRHBP,PPT1,LRRTM2,SLITRK5,RELN,CLSTN3,PSEN1,PSEN2,SYT12,LRFN3,PCDHB5,PTGS2,PTPRD,PTPRN2,PTPRS,SV2B,SV2A…
GO: Biological Process	GO:0007268	chemical synaptic transmission		2.985e-22	2.432e-18	1.057e-19	1.013e-18	149	680	ACHE,ABHD6,SLC12A5,MET,LRFN2,ADRB1,NLGN2,SYT13,LRFN1,PCDHB16,ATP2B2,NCAM1,BDNF,TSPO,CACNA1G,NPY,CACNA1A,CACNA1B,CACNA1C,CNTN4,NPTX1,NPTX2,NPY2R,NPY5R,NTRK2,NTSR1,CAV2,CCKBR,OPRL1,P2RX4,SYNGR1,PCDH8,CDH8,CHRM1,CHRM3,CHRM4,CHRNA5,CHRNB2,NLGN3,LRFN4,NRXN3,CLCN3,NRXN1,NRXN2,SLC24A2,PLAT,PNOC,GABBR2,CRHBP,PPT1,LRRTM2,SLITRK5,RELN,CLSTN3,PSEN1,PSEN2,SYT12,LRFN3,PCDHB5,PTGS2,PTPRD,PTPRN2,PTPRS,SV2B,SV2A…
GO: Biological Process	GO:0098916	anterograde trans-synaptic signaling		2.985e-22	2.432e-18	1.057e-19	1.013e-18	149	680	ACHE,ABHD6,SLC12A5,MET,LRFN2,ADRB1,NLGN2,SYT13,LRFN1,PCDHB16,ATP2B2,NCAM1,BDNF,TSPO,CACNA1G,NPY,CACNA1A,CACNA1B,CACNA1C,CNTN4,NPTX1,NPTX2,NPY2R,NPY5R,NTRK2,NTSR1,CAV2,CCKBR,OPRL1,P2RX4,SYNGR1,PCDH8,CDH8,CHRM1,CHRM3,CHRM4,CHRNA5,CHRNB2,NLGN3,LRFN4,NRXN3,CLCN3,NRXN1,NRXN2,SLC24A2,PLAT,PNOC,GABBR2,CRHBP,PPT1,LRRTM2,SLITRK5,RELN,CLSTN3,PSEN1,PSEN2,SYT12,LRFN3,PCDHB5,PTGS2,PTPRD,PTPRN2,PTPRS,SV2B,SV2A…
GO: Biological Process	GO:0099536	synaptic signaling		1.148e-21	9.355e-18	3.898e-19	3.735e-18	149	689	ACHE,ABHD6,SLC12A5,MET,LRFN2,ADRB1,NLGN2,SYT13,LRFN1,PCDHB16,ATP2B2,NCAM1,BDNF,TSPO,CACNA1G,NPY,CACNA1A,CACNA1B,CACNA1C,CNTN4,NPTX1,NPTX2,NPY2R,NPY5R,NTRK2,NTSR1,CAV2,CCKBR,OPRL1,P2RX4,SYNGR1,PCDH8,CDH8,CHRM1,CHRM3,CHRM4,CHRNA5,CHRNB2,NLGN3,LRFN4,NRXN3,CLCN3,NRXN1,NRXN2,SLC24A2,PLAT,PNOC,GABBR2,CRHBP,PPT1,LRRTM2,SLITRK5,RELN,CLSTN3,PSEN1,PSEN2,SYT12,LRFN3,PCDHB5,PTGS2,PTPRD,PTPRN2,PTPRS,SV2B,SV2A…
GO: Biological Process	GO:0098660	inorganic ion transmembrane transport		4.693e-21	3.823e-17	1.529e-18	1.466e-17	157	754	KCNH7,SLC24A3,AMIGO1,SLC12A5,KCNT1,STIM2,DPP10,HCN3,ASPH,ATP1A1,ATP1A3,ATP1B1,ATP2B1,ATP2B2,ATP2B3,ATP2B4,ATP6V0B,ATP6V0A1,ATP6AP1,FXYD5,NDUFA4,BMP4,CACNA1I,CACNA1H,CACNA1G,CACNA1A,CACNA1B,CACNA1C,CACNA2D1,ATP6V0E1,HCN1,NTSR1,OPRL1,CBARP,KCNB2,CLCN2,CLCN3,CLCN4,CLCN7,NALCN,SLC24A2,STOML1,TMEM38A,SLC39A6,GSTO1,CNGA4,SLC4A7,SLC39A3,COX4I1,SLC30A7,PRNP,CYBA,TRPM4,PSEN1,KCNK4,KCNG2,SLC26A8,ATP2C2,TMC…
GO: Biological Process	GO:0050803	regulation of synapse structure or activity		9.896e-21	8.063e-17	3.101e-18	2.972e-17	81	274	ABHD6,SLITRK1,AMIGO1,ADRB1,NLGN2,APP,ATP2B2,ADGRB1,ADGRB2,ADGRB3,NCAM1,BDNF,CNTN4,NTRK2,NTRK3,SYNGR1,ADGRE5,CDH2,CHRNB2,NLGN3,NRXN3,NRXN1,SLC24A2,LRRN3,PPT1,LRRTM2,SLITRK5,RELN,CLSTN3,PSEN1,PSEN2,SYT12,PTGS2,NECTIN1,DRD5,RASGRF1,ROBO2,EPHA7,EPHB1,EPHB2,EPHB3,LRRTM4,ADGRL1,LINGO2,NLGN1,CLSTN1,NPTN,SLC8A2,SLIT1,SORCS3,CLSTN2,SYP,ADGRL2,ADGRL3,GRIA1,GRIK1,GRIK2,GRIN1,GRIN2B,GRM5,THBS2,KLK8,TNR,AGRN,…
GO: Biological Process	GO:0031175	neuron projection development		1.475e-20	1.201e-16	4.45e-18	4.264e-17	184	956	MAG,ZFYVE27,ACHE,MATN2,TENM2,DSCAML1,SLITRK1,AMIGO1,SLC12A5,UNC5A,MET,LRFN2,KIDINS220,NLGN2,MMP2,ISLR2,LRFN1,SEMA7A,CNTNAP1,LRRC4C,APP,UNC5C,CAPRIN2,ADGRB1,ADGRB3,NCAM1,NDN,BDNF,NRP2,NRP1,BMP4,BMP7,NEO1,NEU1,NFIB,TSPO,SDK1,NPY,CACNA1A,CNTN4,DDR1,NPTX1,NRCAM,NTRK2,NTRK3,OMD,OMG,CCK,CD44,CDH2,CDH11,NOG,CHRNB2,SLIT2,NLGN3,LRFN4,NRXN3,NRXN1,CLU,PLXNA1,PLXNA2,CNTN1,TSKU,TMEM106B,CNTNAP2,PLXNA4,SLITRK5…
GO: Biological Process	GO:0098655	cation transmembrane transport		2.403e-20	1.958e-16	6.992e-18	6.7e-17	153	738	KCNH7,SLC24A3,AMIGO1,SLC12A5,ADRB1,KCNT1,STIM2,FAM26E,DPP10,HCN3,ASPH,ATP1A1,ATP1A3,ATP1B1,ATP2B1,ATP2B2,ATP2B3,ATP2B4,ATP6V0B,ATP6V0A1,ATP6AP1,FXYD5,NDUFA4,BMP4,CACNA1I,CACNA1H,CACNA1G,CACNA1A,CACNA1B,CACNA1C,CACNA2D1,ATP6V0E1,HCN1,NTSR1,ATP13A5,OPRL1,P2RX4,CBARP,KCNB2,CHRNA5,CHRNB2,NALCN,SLC24A2,STOML1,TMEM38A,SLC39A6,GSTO1,CNGA4,SLC4A7,SLC39A3,COX4I1,SLC30A7,CTSS,PRNP,CYBA,TRPM4,PSEN1,KCNK4,KC…
GO: Biological Process	GO:0006820	anion transport		6.062e-20	4.939e-16	1.691e-17	1.62e-16	138	641	ABCA2,SLC12A5,SERINC1,ABCC1,PEX3,SLC7A14,SLC17A8,BDNF,BSG,SLC5A6,TSPO,NMB,CA4,CACNA1A,NPY2R,NPY5R,NTRK2,NTSR1,CCK,SLCO4C1,P2RX4,SLC16A3,SLC33A1,CHRNB2,ABCB4,CLCN2,CLCN3,CLCN4,CLCN6,CLCN7,CLN3,PLA2G4A,MPC2,SLC4A7,ABCG1,SLC13A5,CTNS,PSEN1,SLC26A8,SLC38A10,SLC52A2,SLC23A2,SLC35B3,SLC35C2,ABCC5,SLC6A15,ANO10,ATP9A,LRRC8D,SLC17A5,SLC35B1,CLN8,ATP9B,SLC22A17,ACSL3,ACSL4,ATP8A1,FGFR1,CXCL12,PCYOX1,LRRC8…
GO: Biological Process	GO:0050807	regulation of synapse organization		6.226e-20	5.072e-16	1.691e-17	1.62e-16	51	127	SLITRK1,AMIGO1,NLGN2,ADGRB1,ADGRB2,ADGRB3,BDNF,NTRK2,NTRK3,ADGRE5,CDH2,CHRNB2,NLGN3,NRXN3,NRXN1,LRRN3,LRRTM2,SLITRK5,RELN,CLSTN3,NECTIN1,ROBO2,EPHA7,EPHB1,EPHB2,EPHB3,LRRTM4,ADGRL1,LINGO2,NLGN1,CLSTN1,SLIT1,CLSTN2,ADGRL2,ADGRL3,GRIN1,THBS2,KLK8,AGRN,TPBG,LRTM2,FLRT3,FLRT2,FLRT1,WNT5A,IL1RAP,LRRTM3,LRRTM1,AMIGO2,SLITRK4,LRRC4B
GO: Biological Process	GO:0007411	axon guidance		7.467e-19	6.083e-15	1.962e-16	1.88e-15	72	241	MATN2,TENM2,UNC5A,SEMA7A,APP,UNC5C,NCAM1,BDNF,NRP2,NRP1,BMP7,NEO1,NFIB,CNTN4,NRCAM,NOG,SLIT2,NRXN3,NRXN1,PLXNA1,PLXNA2,PLXNA4,SEMA3E,BOC,RELN,DAG1,SEMA4C,PTPRA,PTPRM,PTPRO,NECTIN1,DSCAM,EFNA1,EFNA2,MEGF8,PLXNC1,ROBO1,ROBO2,EPHA3,EPHA4,EPHA5,EPHA7,EPHA8,EPHB1,EPHB2,EPHB3,EXT1,RYK,SCN1B,CXCL12,SEMA6C,SEMA3F,SEMA6B,SEMA4F,SEMA4D,SEMA4B,SEMA3C,SLIT1,SLIT3,NFASC,SEMA4A,GPC1,B4GAT1,TNR,AGRN,PLXNB2,FLRT…
GO: Biological Process	GO:0097485	neuron projection guidance		9.647e-19	7.859e-15	2.456e-16	2.353e-15	72	242	MATN2,TENM2,UNC5A,SEMA7A,APP,UNC5C,NCAM1,BDNF,NRP2,NRP1,BMP7,NEO1,NFIB,CNTN4,NRCAM,NOG,SLIT2,NRXN3,NRXN1,PLXNA1,PLXNA2,PLXNA4,SEMA3E,BOC,RELN,DAG1,SEMA4C,PTPRA,PTPRM,PTPRO,NECTIN1,DSCAM,EFNA1,EFNA2,MEGF8,PLXNC1,ROBO1,ROBO2,EPHA3,EPHA4,EPHA5,EPHA7,EPHA8,EPHB1,EPHB2,EPHB3,EXT1,RYK,SCN1B,CXCL12,SEMA6C,SEMA3F,SEMA6B,SEMA4F,SEMA4D,SEMA4B,SEMA3C,SLIT1,SLIT3,NFASC,SEMA4A,GPC1,B4GAT1,TNR,AGRN,PLXNB2,FLRT…
GO: Biological Process	GO:0034976	response to endoplasmic reticulum stress		1.106e-18	9.008e-15	2.73e-16	2.616e-15	76	265	DNAJB9,SCAMP5,AMFR,DDRGK1,MBTPS1,AUP1,CALR,CREB3L1,STT3B,P4HB,SRPRB,SELENOK,DNAJC10,TMEM259,TPP1,TMX3,EIF2AK3,POMT2,DERL1,PDIA4,EDEM1,DNAJC3,HERPUD1,FBXO6,ATG10,DERL2,TXNDC12,TXNDC11,BCAP31,UBAC2,TRIM13,TBL2,RNF121,BFAR,EXTL3,TMEM129,MBTPS2,SDF2,CREB3,SEL1L,HYOU1,JKAMP,POMT1,EDEM3,EDEM2,SYVN1,DNAJB11,SELENOS,ERP44,SRPRA,SSR1,NRROS,ERLEC1,MYDGF,SERINC3,OS9,ERP29,UFL1,GRINA,TMBIM6,PDIA3,PPP1R15B,SE…
GO: Biological Process	GO:0006487	protein N-linked glycosylation		1.904e-18	1.551e-14	4.562e-16	4.371e-15	38	79	MAN2A2,MAN2A1,MGAT2,MGAT5,MCFD2,ST3GAL5,STT3B,OSTC,ALG5,ALG8,ALG6,MGAT4C,ALG12,GNPTAB,EDEM1,DAD1,DPAGT1,RPN1,RPN2,MAGT1,ST3GAL6,NUDT14,ST3GAL3,EDEM3,EDEM2,SYVN1,FUT8,TMEM165,GNPTG,GANAB,MAN1B1,MGAT4B,B4GALT7,STT3A,MOGS,TUSC3,LMAN1,ST6GALNAC5
GO: Biological Process	GO:0048666	neuron development		4.107e-18	3.346e-14	9.41e-16	9.018e-15	199	1120	MAG,ZFYVE27,ACHE,MATN2,TENM2,DSCAML1,SLITRK1,AMIGO1,SLC12A5,UNC5A,MET,LRFN2,KIDINS220,NLGN2,MMP2,ISLR2,LRFN1,SEMA7A,CNTNAP1,LRRC4C,APP,UNC5C,CAPRIN2,ATP2B2,NAGLU,ADGRB1,ADGRB3,NCAM1,NDN,BDNF,NRP2,NRP1,BMP4,BMP7,NEO1,NEU1,NFIB,TSPO,SDK1,NPY,CACNA1A,CNTN4,DDR1,NPTX1,NRCAM,HCN1,NTRK2,NTRK3,OMD,OMG,CCK,CD44,CDH2,CDH11,NOG,CHRNB2,SLIT2,NLGN3,LRFN4,NRXN3,NRXN1,CLU,CLN5,PLXNA1,PLXNA2,CNTN1,SLC4A7,TSKU,T…
GO: Biological Process	GO:0019725	cellular homeostasis		4.158e-18	3.388e-14	9.41e-16	9.018e-15	168	887	AQP11,SLC24A3,ADCYAP1R1,SLC12A5,ADRA1D,ADRA1B,TXNDC16,STIM2,APLP2,APP,ASPH,ATP1A1,ATP1A3,ATP1B1,ATP2B1,ATP2B2,ATP2B3,ATP2B4,ATP6V0B,ATP6V0A1,BMP4,NELL2,CACNA1I,CACNA1G,NMB,CACNA1A,NPM1,CACNA1C,CACNA2D1,NPY1R,NPY2R,CALCA,ATP6V0E1,CALR,NTSR1,NUCB2,ATP13A5,CCKBR,OPRL1,P2RX4,P4HB,XPR1,LARGE1,PDGFRA,CLCN3,DNAJC10,CLCN6,NRXN1,SLC24A2,CLN3,CLN5,SLC39A6,PLAU,TMX3,GSTO1,MPC2,SLC4A7,CP,SLC30A7,PDIA4,PPT1,F…
GO: Biological Process	GO:0007267	cell-cell signaling		7.919e-18	6.452e-14	1.744e-15	1.671e-14	213	1235	ACHE,ABHD6,MC4R,ACVR2A,ACVR2B,ADAM10,SLC12A5,MET,ADRA1D,ADRA1B,LRFN2,ADRB1,NLGN2,LTBP4,SYT13,LRFN1,PCDHB16,ATP2B2,DGAT1,NCAM1,BDNF,NRP1,BMP3,BMP4,NELL2,TSPO,CACNA1G,NMB,NPY,CACNA1A,CACNA1B,CACNA1C,CNTN4,NPTX1,NPTX2,NPY1R,NPY2R,NPY5R,CALCA,NTRK2,MPZL1,NTSR1,NUCB2,CAV2,CCKBR,OPRL1,P2RX4,CD34,SYNGR1,ADGRE5,PCDH1,PCDH8,CDH8,PCSK5,WNT4,CHRM1,CHRM3,CHRM4,CHRNA5,CHRNB2,NLGN3,LRFN4,NRXN3,CLCN3,NRXN1,NRXN…
GO: Biological Process	GO:0051960	regulation of nervous system development		8.585e-18	6.994e-14	1.841e-15	1.764e-14	167	886	MAG,MAN2A1,ACHE,SLITRK1,AMIGO1,MET,KIDINS220,JAG1,NLGN2,ISLR2,SEMA7A,LRRC4C,APP,CAPRIN2,BRINP2,ADGRB1,ADGRB2,ADGRB3,BDNF,NRP1,BMP4,BMP7,NEU1,TSPO,VWC2L,SDK1,CACNA1A,CNTN4,NRCAM,CALR,NTRK2,NTRK3,OMG,ADGRE5,CDH2,NOG,CHRNB2,SLIT2,NLGN3,NRXN3,NRXN1,EIF2AK3,PLXNA1,PLXNA2,CNTN1,COL3A1,CPE,TMEM106B,LRRN3,TENM4,LRRTM2,PLXNA4,SLITRK5,SEMA3E,RELN,CLSTN3,KLK6,PSEN1,BRINP1,CASZ1,PTK7,SEMA4C,KIAA0319,PTPRA,PT…
GO: Biological Process	GO:0006643	membrane lipid metabolic process		9.071e-17	7.39e-13	1.895e-14	1.816e-13	61	199	SERINC1,PPM1L,DEGS1,ARSA,ASAH1,B4GALT4,GPAA1,NAGA,NEU1,ST3GAL5,SGPL1,CERS5,HACD1,LARGE1,PIGC,PIGH,CLN3,ALG5,ST8SIA5,KDELC1,CTSA,PPT1,PSAP,PIGG,PIGX,CLN6,PIGK,PIGU,CLN8,ACER3,ARSK,ST3GAL6,PGAP1,SPTLC1,ST3GAL3,PIGT,SMPD1,KDSR,TEX2,GBA,SMPDL3B,GLA,GLB1,SUMF1,GM2A,SERINC3,PIGO,TNFRSF1A,HEXA,PGAP3,PLA2G15,UGCG,UGT8,ASAH2,AGMO,ITGB8,POGLUT1,GAL3ST3,KIT,ORMDL3,ST6GALNAC5
GO: Biological Process	GO:0050770	regulation of axonogenesis		1.127e-16	9.184e-13	2.296e-14	2.2e-13	59	189	MAG,ACHE,AMIGO1,ISLR2,SEMA7A,LRRC4C,BDNF,NRP1,CACNA1A,NRCAM,NTRK2,NTRK3,OMG,CDH2,SLIT2,PLXNA1,PLXNA2,PLXNA4,SEMA3E,PSEN1,SEMA4C,PTPRO,DSCAM,EFNA1,MEGF8,PLXNC1,ROBO1,ROBO2,EPHA4,EPHA7,EPHB2,EPHB3,RYK,TRPV2,CXCL12,SEMA6C,SEMA3F,SEMA6B,SEMA4F,SEMA4D,SEMA4B,SEMA3C,FN1,SLIT1,SLIT3,SPP1,FSTL4,SEMA4A,GRIN1,THY1,LINGO1,TNR,AGRN,PLXNB2,WNT5A,IFRD1,RTN4R,RGMA,L1CAM
GO: Biological Process	GO:0007155	cell adhesion		1.916e-16	1.561e-12	3.808e-14	3.649e-13	246	1535	MAG,ACHE,ADAM10,TENM2,DSCAML1,AMIGO1,PCDH19,NLGN2,MMP2,MMP14,PCDH10,CD200,CNTNAP1,APP,ADAM22,PCDHB16,ASTN1,ATP1B1,CADM3,ADAM23,ADAM15,ADAM9,ADGRB1,FXYD5,NCAM1,NCAM2,NRP2,BLM,BMP4,BMP7,NEO1,SGCE,SDK1,CNTN4,DDR1,NPY2R,CALCA,NRCAM,CALR,WHAMM,IGSF11,OMD,OMG,CD9,CD34,CD44,CD47,CNTN3,ADGRE5,CDH2,PCDH1,PCDH7,PCDH8,CDH6,PCDH9,CDH8,CDH9,HACD1,CDH10,CDH11,CDH12,CDH13,CDH18,PDGFRA,WNT4,CD83,SLIT2,NLGN3,SELE…
GO: Biological Process	GO:0098662	inorganic cation transmembrane transport		2.372e-16	1.932e-12	4.601e-14	4.409e-13	133	667	KCNH7,SLC24A3,AMIGO1,SLC12A5,KCNT1,STIM2,DPP10,HCN3,ASPH,ATP1A1,ATP1A3,ATP1B1,ATP2B1,ATP2B2,ATP2B3,ATP2B4,ATP6V0B,ATP6V0A1,ATP6AP1,FXYD5,NDUFA4,BMP4,CACNA1I,CACNA1H,CACNA1G,CACNA1A,CACNA1B,CACNA1C,CACNA2D1,ATP6V0E1,HCN1,NTSR1,OPRL1,CBARP,KCNB2,NALCN,SLC24A2,STOML1,TMEM38A,SLC39A6,GSTO1,CNGA4,SLC4A7,SLC39A3,COX4I1,SLC30A7,PRNP,CYBA,TRPM4,PSEN1,KCNK4,KCNG2,ATP2C2,TMCO3,DPP6,TMEM38B,CNNM4,CACNG8,NPS…
GO: Biological Process	GO:0022610	biological adhesion		2.604e-16	2.121e-12	4.933e-14	4.727e-13	247	1547	MAG,ACHE,ADAM10,TENM2,DSCAML1,AMIGO1,PCDH19,NLGN2,MMP2,MMP14,PCDH10,CD200,CNTNAP1,APP,ADAM22,PCDHB16,ASTN1,ATP1B1,CADM3,ADAM23,ADAM15,ADAM9,ADGRB1,FXYD5,NCAM1,NCAM2,NRP2,BLM,BMP4,BMP7,NEO1,SGCE,SDK1,CNTN4,DDR1,NPY2R,CALCA,NRCAM,CALR,WHAMM,IGSF11,OMD,OMG,CD9,CD34,CD44,CD47,CNTN3,CD81,ADGRE5,CDH2,PCDH1,PCDH7,PCDH8,CDH6,PCDH9,CDH8,CDH9,HACD1,CDH10,CDH11,CDH12,CDH13,CDH18,PDGFRA,WNT4,CD83,SLIT2,NLGN3…
GO: Biological Process	GO:0098656	anion transmembrane transport		2.776e-16	2.261e-12	5.139e-14	4.925e-13	72	266	SLC12A5,ABCC1,PEX3,SLC7A14,SLC17A8,SLC5A6,SLC16A3,CLCN2,CLCN3,CLCN4,CLCN6,CLCN7,MPC2,SLC4A7,SLC13A5,SLC26A8,SLC38A10,SLC23A2,SLC35B3,ABCC5,SLC6A15,ANO10,LRRC8D,SLC17A5,SLC35B1,PCYOX1,LRRC8C,SLC37A3,EMB,SLC1A1,SLC1A4,SLC1A6,SLC6A7,SLC7A1,SLC7A4,SLC12A4,SLC15A4,SLC20A1,SLC22A5,SLC12A7,ANO3,SLC37A4,ACSL5,GABRA1,GABRA2,GABRA3,GABRA5,GABRB1,GABRB3,GABRD,GABRG2,CLCC1,ABCC8,GLRA2,GLRB,SLC16A11,ANKH,SLC7…
GO: Biological Process	GO:0007610	behavior		5.676e-16	4.624e-12	1.028e-13	9.847e-13	133	674	MAN2B1,MC4R,SLITRK1,ADCY8,SLC12A5,FZD9,MET,ADRA1B,ADRB1,NLGN2,MMP17,AMFR,APLP2,APP,ADAM22,ASTN1,ATP1A3,ATP2B2,DGAT1,NAGLU,ADGRB3,NCAM1,BDNF,TSPO,SDK1,NPY,CACNA1A,CACNA1B,CACNA1C,NPTX2,NPY1R,NPY2R,NPY5R,CALCA,NTRK2,NTSR1,CCK,CCKBR,OPRL1,NOG,ZDHHC8,CHRNA5,CHRNB2,NLGN3,NRXN3,CLCN3,NRXN1,NRXN2,SLC24A2,CLN3,CYP7B1,CHST10,COMT,CRHBP,PPT1,CNTNAP2,SLITRK5,CTNS,ABHD12,PRNP,RELN,PSEN1,PSEN2,BRINP1,PTGS2,KC…
GO: Biological Process	GO:0007156	homophilic cell adhesion via plasma membrane adhesion molecules		1.126e-15	9.174e-12	1.994e-13	1.911e-12	52	160	DSCAML1,AMIGO1,PCDH19,PCDH10,CD200,PCDHB16,CADM3,SDK1,CDH2,PCDH1,PCDH7,PCDH8,CDH6,PCDH9,CDH8,CDH9,CDH10,CDH11,CDH12,CDH13,CDH18,SDK2,NECTIN3,CLSTN3,PCDHB5,PTPRM,PTPRR,NECTIN1,NECTIN2,DSCAM,CELSR2,ROBO1,ROBO2,CLSTN1,NPTN,CLSTN2,KIRREL3,PCDHB15,PCDHB14,PCDHB13,PCDHB12,PCDHB11,PCDHB10,PCDHB9,PCDHB4,PCDHB3,CDH24,CADM4,CADM2,CDH20,AMIGO2,L1CAM
GO: Biological Process	GO:1902667	regulation of axon guidance		1.857e-15	1.513e-11	3.219e-13	3.084e-12	25	42	SEMA7A,NRP1,SLIT2,PLXNA1,PLXNA2,PLXNA4,SEMA3E,SEMA4C,PTPRO,DSCAM,MEGF8,PLXNC1,RYK,CXCL12,SEMA6C,SEMA3F,SEMA6B,SEMA4F,SEMA4D,SEMA4B,SEMA3C,SLIT1,SEMA4A,AGRN,WNT5A
GO: Biological Process	GO:0098771	inorganic ion homeostasis		2.035e-15	1.658e-11	3.453e-13	3.309e-12	135	699	AQP11,SLC24A3,ADCYAP1R1,SLC12A5,ADRA1D,ADRA1B,STIM2,APLP2,APP,ASPH,ATP1A1,ATP1A3,ATP1B1,ATP2B1,ATP2B2,ATP2B3,ATP2B4,HYAL2,ATP6V0B,ATP6V0A1,ATP6AP1,BMP4,NEO1,CACNA1I,CACNA1G,NMB,CA4,CACNA1A,SFXN4,CACNA1C,CACNA2D1,NPY1R,NPY2R,CALCA,ATP6V0E1,CALR,NTSR1,NUCB2,ATP13A5,CCKBR,OPRL1,P2RX4,XPR1,PDGFRA,CLCN3,SLC24A2,CLN3,CLN5,SLC39A6,GSTO1,SLC4A7,COMT,CP,SLC30A7,PPT1,FAM20A,HERPUD1,PRNP,CYBA,TRPM4,CNNM2,PS…
GO: Biological Process	GO:0050801	ion homeostasis		2.706e-15	2.205e-11	4.5e-13	4.312e-12	143	760	AQP11,SLC24A3,ADCYAP1R1,SLC12A5,ADRA1D,ADRA1B,STIM2,APLP2,APP,ASPH,ATP1A1,ATP1A3,ATP1B1,ATP2B1,ATP2B2,ATP2B3,ATP2B4,HYAL2,DGAT1,ATP6V0B,ATP6V0A1,ATP6AP1,BMP4,NEO1,TSPO,CACNA1I,CACNA1G,NMB,CA4,CACNA1A,SFXN4,CACNA1C,CACNA2D1,NPY1R,NPY2R,CALCA,ATP6V0E1,CALR,HCN1,NTSR1,NUCB2,ATP13A5,CCK,CCKBR,OPRL1,P2RX4,XPR1,PDGFRA,CLCN3,SLC24A2,CLN3,CLN5,SLC39A6,GSTO1,SLC4A7,COMT,CP,SLC30A7,ABCG1,PPT1,FAM20A,HERPUD…
GO: Biological Process	GO:0048699	generation of neurons		3.126e-15	2.547e-11	5.094e-13	4.881e-12	242	1538	MAG,MAN2A1,ZFYVE27,ACHE,MATN2,TENM2,DSCAML1,SLITRK1,AMIGO1,SLC12A5,FZD9,UNC5A,MET,LRFN2,KIDINS220,JAG1,NLGN2,MMP2,ISLR2,LRFN1,SEMA7A,CNTNAP1,LRRC4C,APP,UNC5C,CAPRIN2,BRINP2,RSPO2,ASTN1,ATP2B2,NAGLU,ADGRB1,ADGRB3,NCAM1,NDN,BDNF,NRP2,NRP1,BMP4,BMP7,NEO1,NEU1,NFIB,TSPO,VWC2L,DAGLA,SDK1,NPY,DAGLB,CACNA1A,CNTN4,DDR1,NPTX1,NRCAM,CALR,HCN1,NTRK2,NTRK3,OMD,OMG,CCK,CD44,CDH2,CDH11,NOG,WNT4,CHRNB2,SLIT2,NL…
GO: Biological Process	GO:0055080	cation homeostasis		4.021e-15	3.276e-11	6.423e-13	6.155e-12	132	683	AQP11,SLC24A3,ADCYAP1R1,SLC12A5,ADRA1D,ADRA1B,STIM2,APLP2,APP,ASPH,ATP1A1,ATP1A3,ATP1B1,ATP2B1,ATP2B2,ATP2B3,ATP2B4,HYAL2,ATP6V0B,ATP6V0A1,ATP6AP1,BMP4,NEO1,CACNA1I,CACNA1G,NMB,CA4,CACNA1A,SFXN4,CACNA1C,CACNA2D1,NPY1R,NPY2R,CALCA,ATP6V0E1,CALR,NTSR1,NUCB2,ATP13A5,CCKBR,OPRL1,P2RX4,PDGFRA,CLCN3,SLC24A2,CLN3,CLN5,SLC39A6,GSTO1,SLC4A7,COMT,CP,SLC30A7,PPT1,FAM20A,HERPUD1,PRNP,CYBA,TRPM4,CNNM2,PSEN1,P…
GO: Biological Process	GO:0010975	regulation of neuron projection development		4.914e-15	4.003e-11	7.699e-13	7.377e-12	105	494	MAG,ACHE,AMIGO1,MET,KIDINS220,NLGN2,ISLR2,SEMA7A,LRRC4C,CAPRIN2,ADGRB3,BDNF,NRP1,BMP4,BMP7,NEU1,SDK1,CACNA1A,NRCAM,NTRK2,NTRK3,OMG,CDH2,CHRNB2,SLIT2,NLGN3,PLXNA1,PLXNA2,CNTN1,TMEM106B,PLXNA4,SEMA3E,RELN,KLK6,PSEN1,PTK7,SEMA4C,KIAA0319,PTPRD,PTPRO,NTM,NDNF,DSCAM,EFNA1,MEGF8,PLXNC1,ROBO1,ROBO2,EPHA3,EPHA4,SEZ6,EPHA7,EPHB2,EPHB3,RYK,EFEMP1,SCN1B,TRPV2,FGFR1,CXCL12,SEMA6C,SEMA3F,SEMA6B,SEMA4F,SEMA4D,…
GO: Biological Process	GO:0006022	aminoglycan metabolic process		5.058e-15	4.121e-11	7.775e-13	7.45e-12	54	176	NDST2,CHST1,CHID1,HYAL2,B4GALT4,NAGLU,OMD,CD44,PDGFRB,B4GALT5,NDST3,CHPF2,CHST2,DSE,GLCE,HS2ST1,VCAN,SDC3,SPOCK2,CLN6,CHPF,HS3ST1,NDNF,ABCC5,CHSY3,DSEL,EXT1,EXT2,EXTL1,EXTL2,EXTL3,CSGALNACT2,ST3GAL6,CHST12,PXYLP1,ST3GAL3,SLC9A1,CSPG5,EGFLAM,FUCA1,GALNS,XYLT2,GPC3,GLB1,GNS,GPC1,B4GAT1,HGSNAT,AGRN,HEXA,B4GALT7,CHST7,GAL3ST3,CEMIP
GO: Biological Process	GO:0000904	cell morphogenesis involved in differentiation		6.757e-15	5.505e-11	1.019e-12	9.769e-12	153	843	MAG,ACHE,MATN2,TENM2,DSCAML1,SLITRK1,AMIGO1,UNC5A,MET,LRFN2,KIDINS220,ISLR2,LRFN1,SEMA7A,VASN,LRRC4C,APP,C1GALT1C1,UNC5C,CAPRIN2,ATP2B2,ADAM15,ADGRB1,ADGRB3,NCAM1,NDN,BDNF,NRP2,NRP1,BMP4,BMP7,NEO1,NFIB,CACNA1A,CNTN4,NPTX1,NRCAM,CALR,NTRK2,NTRK3,OMD,OMG,CCK,CDH2,CDH11,NOG,WNT4,CHRNB2,SLIT2,NLGN3,LRFN4,NRXN3,NRXN1,BAMBI,PLXNA1,PLXNA2,COL1A1,TSKU,TMEM106B,PLXNA4,SLITRK5,LHFPL5,SEMA3E,BOC,RELN,PSEN1,…
GO: Biological Process	GO:0030203	glycosaminoglycan metabolic process		8.243e-15	6.716e-11	1.221e-12	1.17e-11	52	167	NDST2,CHST1,HYAL2,B4GALT4,NAGLU,OMD,CD44,PDGFRB,B4GALT5,NDST3,CHPF2,CHST2,DSE,GLCE,HS2ST1,VCAN,SDC3,SPOCK2,CLN6,CHPF,HS3ST1,NDNF,ABCC5,CHSY3,DSEL,EXT1,EXT2,EXTL1,EXTL2,EXTL3,CSGALNACT2,ST3GAL6,CHST12,PXYLP1,ST3GAL3,SLC9A1,CSPG5,EGFLAM,FUCA1,GALNS,XYLT2,GPC3,GLB1,GNS,GPC1,B4GAT1,HGSNAT,AGRN,HEXA,B4GALT7,CHST7,CEMIP
GO: Biological Process	GO:0005975	carbohydrate metabolic process		8.832e-15	7.195e-11	1.285e-12	1.231e-11	150	823	MAN2A2,MAN2A1,MAN2B1,MANBA,MAS1,GALNT16,ADCYAP1R1,ADRA1B,MGAT2,MGAT5,ADRB1,MCFD2,CHST1,C1GALT1C1,CHID1,HYAL2,B4GALT4,B3GALT4,B3GALNT1,B3GALT2,DPY19L3,CDS2,NAGA,NEU1,BPGM,ST3GAL5,CACNA1A,NPY1R,NTSR1,STT3B,LARGE1,B4GALT5,OSTC,SIAE,CLN5,ALG5,ALG8,ST8SIA5,CHST2,GSTO1,ALG6,MGAT4C,ALG12,POMT2,DDIT4,CHST10,SLC2A8,FKRP,GNPTAB,TMEM59,HS2ST1,GALNT9,EDEM1,GLT8D2,PSEN1,MLEC,DAD1,DAG1,GALNT18,PTH1R,XYLB,SLC23…
GO: Biological Process	GO:0043269	regulation of ion transport		1.005e-14	8.184e-11	1.436e-12	1.376e-11	129	669	KCNH7,ADCYAP1R1,AMIGO1,ADRB1,NLGN2,STIM2,DPP10,HCN3,ASPH,ATP1A1,ATP1B1,ATP2B2,ATP2B4,FXYD5,BMP4,TSPO,CACNA1I,CACNA1H,CACNA1G,CACNA1A,CACNA1B,CACNA1C,CACNA2D1,NPY2R,NPY5R,CALCA,HCN1,NTSR1,CCK,OPRL1,P2RX4,PDGFRB,CBARP,KCNB2,CHRM1,CHRNB2,ABCB4,NLGN3,SELENOK,CLCN2,CLCN3,CLCN4,CLCN6,CLCN7,NRXN1,NALCN,STOML1,TMEM109,GSTO1,CNTN1,CRHBP,CTSS,PRNP,CYBA,RELN,PTGS2,KCNK4,KCNG2,ATP2C2,DPP6,RASGRF1,LRRC8D,CACN…
GO: Biological Process	GO:0098742	cell-cell adhesion via plasma-membrane adhesion molecules		1.73e-14	1.41e-10	2.43e-12	2.329e-11	63	232	TENM2,DSCAML1,AMIGO1,PCDH19,PCDH10,CD200,PCDHB16,CADM3,FXYD5,SDK1,CDH2,PCDH1,PCDH7,PCDH8,CDH6,PCDH9,CDH8,CDH9,CDH10,CDH11,CDH12,CDH13,CDH18,NRXN1,SDK2,NECTIN3,CXADR,CLSTN3,PCDHB5,PTPRD,PTPRM,PTPRR,NECTIN1,NECTIN2,DSCAM,CELSR2,ROBO1,ROBO2,CX3CL1,ADGRL1,NLGN1,CLSTN1,NPTN,ATP2C1,CLSTN2,KIRREL3,PCDHB15,PCDHB14,PCDHB13,PCDHB12,PCDHB11,PCDHB10,PCDHB9,PCDHB4,PCDHB3,IL1RAPL1,CDH24,CLDN5,CADM4,CADM2,CDH20…
GO: Biological Process	GO:0044723	single-organism carbohydrate metabolic process		2.071e-14	1.687e-10	2.859e-12	2.74e-11	137	734	MAN2A2,MAN2A1,MAN2B1,MANBA,MAS1,GALNT16,ADCYAP1R1,ADRA1B,MGAT2,MGAT5,ADRB1,MCFD2,CHST1,C1GALT1C1,B4GALT4,B3GALT4,B3GALNT1,B3GALT2,DPY19L3,CDS2,NEU1,BPGM,ST3GAL5,CACNA1A,NPY1R,NTSR1,STT3B,LARGE1,B4GALT5,OSTC,CLN5,ALG5,ALG8,ST8SIA5,GSTO1,ALG6,MGAT4C,ALG12,POMT2,DDIT4,CHST10,SLC2A8,FKRP,GNPTAB,TMEM59,HS2ST1,GALNT9,EDEM1,GLT8D2,PSEN1,DAD1,DAG1,GALNT18,PTH1R,XYLB,SLC23A2,DPAGT1,GALNT14,SRD5A3,SLC35C2,…
GO: Biological Process	GO:0050919	negative chemotaxis		2.456e-14	2.001e-10	3.336e-12	3.196e-11	24	42	SEMA7A,NRP2,SLIT2,PLXNA4,SEMA3E,SEMA4C,ROBO1,ROBO2,EPHA7,RYK,SEMA6C,SEMA3F,SEMA6B,SEMA4F,SEMA4D,SEMA4B,SEMA3C,SLIT1,SLIT3,SEMA4A,FLRT3,FLRT2,WNT5A,ITGAV
GO: Biological Process	GO:0051962	positive regulation of nervous system development		2.633e-14	2.145e-10	3.517e-12	3.37e-11	109	534	MAG,MAN2A1,ACHE,SLITRK1,AMIGO1,MET,KIDINS220,NLGN2,ISLR2,SEMA7A,CAPRIN2,BRINP2,ADGRB1,ADGRB2,ADGRB3,BDNF,NRP1,BMP4,BMP7,NEU1,TSPO,VWC2L,NRCAM,NTRK2,NTRK3,ADGRE5,NOG,SLIT2,NLGN3,NRXN3,NRXN1,CNTN1,TMEM106B,LRRN3,TENM4,LRRTM2,SLITRK5,RELN,CLSTN3,PSEN1,BRINP1,PTK7,PTPRA,PTPRD,NDNF,DSCAM,MEGF8,ROBO1,ROBO2,EPHA3,EPHA4,SEZ6,EPHB1,EPHB2,EPHB3,SCN1B,LRRTM4,TRPV2,FGFR1,CX3CL1,CXCL12,SEMA4D,FN1,SYT3,ADGRL1,…
GO: Biological Process	GO:0048878	chemical homeostasis		3.112e-14	2.535e-10	4.089e-12	3.918e-11	189	1138	ABCA2,AQP11,SLC24A3,ADCY2,ADCY8,ADCYAP1R1,SLC12A5,MET,ADRA1D,ADRA1B,ADRB1,STIM2,APLP2,APP,ASPH,ATP1A1,ATP1A3,ATP1B1,ATP2B1,ATP2B2,ATP2B3,ATP2B4,HYAL2,DGAT1,ATP6V0B,ATP6V0A1,ATP6AP1,BMP4,NEO1,TSPO,CACNA1I,CACNA1G,NMB,CA4,CACNA1A,SFXN4,CACNA1C,CACNA2D1,NPY1R,NPY2R,CALCA,ATP6V0E1,CALR,HCN1,NTSR1,NUCB2,ATP13A5,CCK,CCKBR,OPRL1,P2RX4,XPR1,PDGFRA,ABCB4,CLCN3,NRXN1,SLC24A2,CLN3,CLN5,SLC39A6,PLA2G4A,PLAU,…
GO: Biological Process	GO:0048846	axon extension involved in axon guidance		3.447e-14	2.808e-10	4.387e-12	4.204e-11	25	46	SEMA7A,NRP2,NRP1,SLIT2,PLXNA1,PLXNA2,PLXNA4,SEMA3E,SEMA4C,DSCAM,MEGF8,PLXNC1,RYK,CXCL12,SEMA6C,SEMA3F,SEMA6B,SEMA4F,SEMA4D,SEMA4B,SEMA3C,SLIT1,SLIT3,SEMA4A,WNT5A
GO: Biological Process	GO:1902284	neuron projection extension involved in neuron projection guidance		3.447e-14	2.808e-10	4.387e-12	4.204e-11	25	46	SEMA7A,NRP2,NRP1,SLIT2,PLXNA1,PLXNA2,PLXNA4,SEMA3E,SEMA4C,DSCAM,MEGF8,PLXNC1,RYK,CXCL12,SEMA6C,SEMA3F,SEMA6B,SEMA4F,SEMA4D,SEMA4B,SEMA3C,SLIT1,SLIT3,SEMA4A,WNT5A
GO: Biological Process	GO:0022008	neurogenesis		3.716e-14	3.027e-10	4.657e-12	4.463e-11	250	1638	MAG,MAN2A1,ZFYVE27,ACHE,MATN2,TENM2,DSCAML1,SLITRK1,AMIGO1,SLC12A5,FZD9,UNC5A,MET,LRFN2,KIDINS220,JAG1,NLGN2,MMP2,MMP14,ISLR2,LRFN1,SEMA7A,CNTNAP1,LRRC4C,APP,ADAM22,UNC5C,CAPRIN2,BRINP2,RSPO2,ASTN1,ATP2B2,NAGLU,ADGRB1,ADGRB3,NCAM1,NDN,BDNF,NRP2,NRP1,BMP4,BMP7,NEO1,NEU1,NFIB,TSPO,VWC2L,DAGLA,SDK1,NPY,DAGLB,CACNA1A,CNTN4,DDR1,NPTX1,NRCAM,CALR,HCN1,NTRK2,NTRK3,OMD,OMG,CCK,CD9,CD44,CDH2,CDH11,NOG,WNT…
GO: Biological Process	GO:0048858	cell projection morphogenesis		4.685e-14	3.817e-10	5.783e-12	5.541e-11	159	908	MAG,TMEM17,ACHE,MATN2,TENM2,DSCAML1,SLITRK1,AMIGO1,UNC5A,MET,LRFN2,KIDINS220,RSPH9,ISLR2,LRFN1,SEMA7A,IFT81,CNTNAP1,LRRC4C,APP,UNC5C,CAPRIN2,ADGRB1,ADGRB3,NCAM1,NDN,BDNF,NRP2,NRP1,BMP7,NEO1,NFIB,CACNA1A,CNTN4,DDR1,NPTX1,NRCAM,NTRK2,NTRK3,OMD,OMG,CCK,CDH2,CDH11,NOG,CHRNB2,SLIT2,NLGN3,LRFN4,NRXN3,NRXN1,CLU,PLXNA1,PLXNA2,TSKU,TMEM106B,PLXNA4,SLITRK5,SEMA3E,BOC,TCTN3,RELN,PSEN1,LRFN3,DAG1,SEMA4C,PTPR…
GO: Biological Process	GO:1903509	liposaccharide metabolic process		4.848e-14	3.95e-10	5.895e-12	5.649e-11	42	121	ARSA,ASAH1,GPAA1,NAGA,NEU1,ST3GAL5,LARGE1,PIGC,PIGH,CLN3,ALG5,ST8SIA5,KDELC1,CTSA,PSAP,PIGG,PIGX,CLN6,PIGK,PIGU,ARSK,ST3GAL6,PGAP1,ST3GAL3,PIGT,SMPD1,GBA,GLA,GLB1,SUMF1,GM2A,PIGO,ALG1,HEXA,PGAP3,UGCG,UGT8,ITGB8,POGLUT1,GAL3ST3,KIT,ST6GALNAC5
GO: Biological Process	GO:0032990	cell part morphogenesis		7.97e-14	6.493e-10	9.549e-12	9.15e-11	161	929	MAG,TMEM17,ACHE,MATN2,TENM2,DSCAML1,SLITRK1,AMIGO1,UNC5A,MET,LRFN2,KIDINS220,RSPH9,ISLR2,LRFN1,SEMA7A,IFT81,CNTNAP1,LRRC4C,APP,UNC5C,CAPRIN2,ADGRB1,ADGRB3,NCAM1,NDN,BDNF,NRP2,NRP1,BMP7,NEO1,NFIB,CACNA1A,CNTN4,DDR1,NPTX1,NRCAM,NTRK2,NTRK3,OMD,OMG,CCK,CDH2,CDH11,NOG,CHRNB2,SLIT2,NLGN3,LRFN4,NRXN3,NRXN1,CLU,PLXNA1,PLXNA2,TSKU,TMEM106B,PLXNA4,SLITRK5,SEMA3E,BOC,TCTN3,RELN,PSEN1,LRFN3,DAG1,SEMA4C,PTPR…
GO: Biological Process	GO:0006664	glycolipid metabolic process		9.317e-14	7.591e-10	1.1e-11	1.054e-10	41	118	ARSA,ASAH1,GPAA1,NAGA,NEU1,ST3GAL5,LARGE1,PIGC,PIGH,CLN3,ALG5,ST8SIA5,KDELC1,CTSA,PSAP,PIGG,PIGX,CLN6,PIGK,PIGU,ARSK,ST3GAL6,PGAP1,ST3GAL3,PIGT,SMPD1,GBA,GLA,GLB1,SUMF1,GM2A,PIGO,HEXA,PGAP3,UGCG,UGT8,ITGB8,POGLUT1,GAL3ST3,KIT,ST6GALNAC5
GO: Biological Process	GO:0048841	regulation of axon extension involved in axon guidance		9.524e-14	7.76e-10	1.109e-11	1.062e-10	22	37	SEMA7A,NRP1,PLXNA1,PLXNA2,PLXNA4,SEMA3E,SEMA4C,DSCAM,MEGF8,PLXNC1,RYK,CXCL12,SEMA6C,SEMA3F,SEMA6B,SEMA4F,SEMA4D,SEMA4B,SEMA3C,SLIT1,SEMA4A,WNT5A
GO: Biological Process	GO:0044708	single-organism behavior		9.826e-14	8.005e-10	1.127e-11	1.08e-10	103	502	MAN2B1,MC4R,SLITRK1,ADCY8,SLC12A5,FZD9,MET,ADRA1B,ADRB1,NLGN2,AMFR,APP,ADAM22,ATP1A3,NAGLU,ADGRB3,NCAM1,BDNF,TSPO,SDK1,NPY,CACNA1A,CACNA1C,NPTX2,NPY2R,NTRK2,NTSR1,CCK,OPRL1,NOG,CHRNA5,CHRNB2,NLGN3,NRXN3,CLCN3,NRXN1,NRXN2,SLC24A2,CLN3,CYP7B1,CHST10,COMT,CRHBP,PPT1,CNTNAP2,SLITRK5,CTNS,ABHD12,PRNP,RELN,PSEN1,PSEN2,BRINP1,PTGS2,KCNK4,DRD5,RASGRF1,SEZ6L2,EPHA4,SEZ6,EPHB2,CLN8,ATP8A1,SCN1A,SCN8A,POMK,…
GO: Biological Process	GO:0015672	monovalent inorganic cation transport		1.123e-13	9.148e-10	1.271e-11	1.218e-10	119	617	KCNH7,SLC24A3,AMIGO1,SLC12A5,KCNT1,ABCC1,DPP10,HCN3,SLC17A8,ATP1A1,ATP1A3,ATP1B1,ATP2B4,ATP6V0B,ATP6V0A1,ATP6AP1,FXYD5,NDUFA4,SLC5A6,CACNA1A,NPY2R,ATP6V0E1,HCN1,SLC25A14,CCKBR,P2RX4,SLC33A1,KCNB2,CHRNB2,ABCB1,NALCN,SLC24A2,STOML1,TMEM38A,CNGA4,CNTN1,SLC4A7,SLC2A8,COX4I1,SLC13A5,PRNP,TRPM4,PSEN1,KCNK4,KCNG2,SLC38A10,TMCO3,SLC23A2,SLC35A5,DPP6,SLC6A15,TMEM38B,SLC17A5,CNNM4,SLC10A7,SCN1A,SCN1B,SCN2A…
GO: Biological Process	GO:0030182	neuron differentiation		1.16e-13	9.447e-10	1.294e-11	1.24e-10	220	1405	MAG,ZFYVE27,ACHE,MATN2,TENM2,DSCAML1,SLITRK1,AMIGO1,SLC12A5,UNC5A,MET,LRFN2,KIDINS220,JAG1,NLGN2,MMP2,ISLR2,LRFN1,SEMA7A,CNTNAP1,LRRC4C,APP,UNC5C,CAPRIN2,BRINP2,RSPO2,ATP2B2,NAGLU,ADGRB1,ADGRB3,NCAM1,NDN,BDNF,NRP2,NRP1,BMP4,BMP7,NEO1,NEU1,NFIB,TSPO,VWC2L,SDK1,NPY,CACNA1A,CNTN4,DDR1,NPTX1,NRCAM,CALR,HCN1,NTRK2,NTRK3,OMD,OMG,CCK,CD44,CDH2,CDH11,NOG,WNT4,CHRNB2,SLIT2,NLGN3,LRFN4,NRXN3,NRXN1,CLU,CLN5…
GO: Biological Process	GO:0015711	organic anion transport		1.222e-13	9.958e-10	1.346e-11	1.29e-10	97	462	ABCA2,SERINC1,ABCC1,PEX3,SLC7A14,SLC17A8,BDNF,BSG,SLC5A6,NMB,CA4,CACNA1A,NPY5R,NTRK2,NTSR1,CCK,SLCO4C1,P2RX4,SLC16A3,SLC33A1,ABCB4,CLN3,PLA2G4A,MPC2,SLC4A7,ABCG1,SLC13A5,CTNS,PSEN1,SLC26A8,SLC38A10,SLC52A2,SLC23A2,SLC35B3,SLC35C2,ABCC5,SLC6A15,ATP9A,SLC17A5,SLC35B1,CLN8,ATP9B,SLC22A17,ACSL3,ACSL4,ATP8A1,EMB,ARL6IP5,SLC35A1,SLC19A2,NPC2,SLC1A1,SLC1A4,SLC1A6,SLC2A1,SLC2A3,SLC3A2,PDPN,SLC6A7,SLC7A1,…
GO: Biological Process	GO:0030433	ubiquitin-dependent ERAD pathway		3.44e-13	2.803e-09	3.737e-11	3.581e-10	30	70	DNAJB9,AMFR,AUP1,STT3B,DNAJC10,DERL1,EDEM1,HERPUD1,FBXO6,DERL2,BCAP31,TRIM13,RNF121,TMEM129,SEL1L,JKAMP,EDEM3,EDEM2,SYVN1,SELENOS,NRROS,ERLEC1,OS9,MAN1B1,HSP90B1,HSPA5,WFS1,UBE2J2,RNF103,CCDC47
GO: Biological Process	GO:0009311	oligosaccharide metabolic process		6.255e-13	5.096e-09	6.705e-11	6.425e-10	29	67	MAN2A2,MAN2A1,MAN2B1,MANBA,MGAT2,B3GALNT1,B3GALT2,NEU1,ST3GAL5,MGAT4C,GNPTAB,EDEM1,ST3GAL6,ST3GAL3,SLC2A1,EDEM3,EDEM2,FUT8,GAA,GNPTG,GANAB,GLA,GM2A,MAN2B2,MAN1B1,MGAT4B,MOGS,GAL3ST3,ST6GALNAC5
GO: Biological Process	GO:0006629	lipid metabolic process		7.046e-13	5.74e-09	7.455e-11	7.144e-10	214	1380	SERPINA3,ABCA2,ACHE,ABHD6,ADORA2B,MGST3,SERINC1,PPM1L,NCEH1,ABCC1,FAM213B,RDH14,APLP2,DGKE,APP,DEGS1,ARSA,ASAH1,ATP1A1,DGAT1,B4GALT4,MBTPS1,GPAA1,CDS2,NAGA,LPCAT4,NDUFAB1,NEU1,ST3GAL5,SGPL1,TSPO,CACNA1H,DAGLA,DAGLB,NUCB2,CCKBR,CERS5,PAM,CD81,HACD1,LARGE1,PDGFRA,PDGFRB,WNT4,ABCB4,CIDEA,PIGC,PIGH,CLU,TPP1,CLN3,PI4KA,ALG5,PLA2G4A,CYP7B1,ALG8,ST8SIA5,KDELC1,ALG6,EIF2AK3,ALG12,COMT,MBOAT7,TECR,PTGES,N…
GO: Biological Process	GO:0050771	negative regulation of axonogenesis		8.421e-13	6.86e-09	8.795e-11	8.428e-10	30	72	MAG,SEMA7A,NRP1,OMG,SLIT2,SEMA3E,PSEN1,SEMA4C,PTPRO,EPHA7,EPHB2,RYK,SEMA6C,SEMA3F,SEMA6B,SEMA4F,SEMA4D,SEMA4B,SEMA3C,SLIT1,SPP1,FSTL4,SEMA4A,THY1,LINGO1,TNR,WNT5A,IFRD1,RTN4R,RGMA
GO: Biological Process	GO:0006024	glycosaminoglycan biosynthetic process		9.035e-13	7.361e-09	9.318e-11	8.929e-10	39	115	NDST2,CHST1,B4GALT4,OMD,PDGFRB,B4GALT5,NDST3,CHPF2,CHST2,DSE,GLCE,HS2ST1,VCAN,SDC3,CHPF,HS3ST1,ABCC5,CHSY3,DSEL,EXT1,EXT2,EXTL1,EXTL2,EXTL3,CSGALNACT2,ST3GAL6,CHST12,PXYLP1,ST3GAL3,CSPG5,XYLT2,GPC3,GPC1,B4GAT1,AGRN,HEXA,B4GALT7,CHST7,CEMIP
GO: Biological Process	GO:0036503	ERAD pathway		9.9e-13	8.066e-09	1.008e-10	9.662e-10	33	86	DNAJB9,AMFR,AUP1,STT3B,DNAJC10,TMEM259,DERL1,EDEM1,HERPUD1,FBXO6,DERL2,BCAP31,UBAC2,TRIM13,RNF121,TMEM129,SEL1L,JKAMP,EDEM3,EDEM2,SYVN1,SELENOS,NRROS,ERLEC1,OS9,MAN1B1,HSP90B1,HSPA5,WFS1,HM13,UBE2J2,RNF103,CCDC47
GO: Biological Process	GO:0042592	homeostatic process		1.099e-12	8.951e-09	1.105e-10	1.059e-09	260	1773	SERPINA3,ABCA2,AQP11,MC4R,SLC24A3,ACVR1B,ACVR2A,ADCY2,SLITRK1,ADCY8,ADCYAP1R1,SLC12A5,MET,ADRA1D,ADRA1B,ADRB1,TXNDC16,DYRK3,STIM2,APLP2,APP,ASPH,ATP1A1,ATP1A3,ATP1B1,ATP2B1,ATP2B2,ATP2B3,ATP2B4,HYAL2,DGAT1,ATP6V0B,ATP6V0A1,ATP6AP1,NDN,BLM,BMP4,NELL2,NEO1,BPGM,NFE2L1,TSPO,CACNA1I,CACNA1G,NMB,CA4,CACNA1A,NPM1,SFXN4,CACNA1C,CACNA2D1,NPY1R,NPY2R,CALCA,ATP6V0E1,CALR,HCN1,NTSR1,NUCB2,ATP13A5,CCK,CCKBR,…
GO: Biological Process	GO:0006873	cellular ion homeostasis		1.142e-12	9.304e-09	1.135e-10	1.087e-09	115	608	AQP11,SLC24A3,ADCYAP1R1,SLC12A5,ADRA1D,ADRA1B,STIM2,APLP2,APP,ASPH,ATP1A1,ATP1A3,ATP1B1,ATP2B1,ATP2B2,ATP2B3,ATP2B4,ATP6V0B,ATP6V0A1,BMP4,CACNA1I,CACNA1G,NMB,CACNA1A,CACNA1C,CACNA2D1,NPY1R,NPY2R,CALCA,ATP6V0E1,CALR,NTSR1,NUCB2,ATP13A5,CCKBR,OPRL1,P2RX4,XPR1,PDGFRA,CLCN3,SLC24A2,CLN3,CLN5,SLC39A6,GSTO1,SLC4A7,CP,SLC30A7,PPT1,HERPUD1,PRNP,CYBA,TRPM4,PSEN1,PSEN2,CD55,PTH1R,SLC26A8,SV2A,ATP2C2,CLN6,A…
GO: Biological Process	GO:0006023	aminoglycan biosynthetic process		1.236e-12	1.007e-08	1.209e-10	1.159e-09	39	116	NDST2,CHST1,B4GALT4,OMD,PDGFRB,B4GALT5,NDST3,CHPF2,CHST2,DSE,GLCE,HS2ST1,VCAN,SDC3,CHPF,HS3ST1,ABCC5,CHSY3,DSEL,EXT1,EXT2,EXTL1,EXTL2,EXTL3,CSGALNACT2,ST3GAL6,CHST12,PXYLP1,ST3GAL3,CSPG5,XYLT2,GPC3,GPC1,B4GAT1,AGRN,HEXA,B4GALT7,CHST7,CEMIP
GO: Biological Process	GO:0008038	neuron recognition		1.247e-12	1.016e-08	1.209e-10	1.159e-09	21	37	DSCAML1,AMIGO1,APP,NDN,BDNF,NRP1,CNTN4,NRCAM,CNTNAP2,NTM,DSCAM,CRTAC1,MEGF8,ROBO1,ROBO2,EPHA3,EPHA4,EPHB2,EPHB3,WNT5A,CXCR4
GO: Biological Process	GO:0055082	cellular chemical homeostasis		1.718e-12	1.4e-08	1.646e-10	1.578e-09	136	769	AQP11,SLC24A3,ADCYAP1R1,SLC12A5,ADRA1D,ADRA1B,STIM2,APLP2,APP,ASPH,ATP1A1,ATP1A3,ATP1B1,ATP2B1,ATP2B2,ATP2B3,ATP2B4,ATP6V0B,ATP6V0A1,BMP4,CACNA1I,CACNA1G,NMB,CACNA1A,CACNA1C,CACNA2D1,NPY1R,NPY2R,CALCA,ATP6V0E1,CALR,NTSR1,NUCB2,ATP13A5,CCKBR,OPRL1,P2RX4,XPR1,PDGFRA,CLCN3,NRXN1,SLC24A2,CLN3,CLN5,SLC39A6,PLAU,GSTO1,MPC2,SLC4A7,CP,SLC30A7,PPT1,FITM2,HERPUD1,PRNP,CYBA,TRPM4,PSEN1,PSEN2,CD55,PTH1R,C2CD…
GO: Biological Process	GO:0070838	divalent metal ion transport		2.294e-12	1.869e-08	2.173e-10	2.083e-09	93	456	SLC24A3,ADCYAP1R1,ADRB1,STIM2,ASPH,ATP1B1,ATP2B1,ATP2B2,ATP2B3,ATP2B4,BMP4,TSPO,CACNA1I,CACNA1H,CACNA1G,NIPA1,NPY,CACNA1A,CACNA1B,CACNA1C,CACNA2D1,CALCA,NTSR1,OPRL1,P2RX4,PDGFRB,CBARP,CHRNB2,SELENOK,NALCN,SLC24A2,SLC39A6,GSTO1,SLC39A3,SLC30A7,CTGF,CYBA,TRPM4,CNNM2,PSEN1,PSEN2,PTGS2,ATP2C2,CNNM4,CACNG8,RAMP1,SLC39A9,NPSR1,MAGT1,TRPV2,CXCL12,STOML2,CREB3,ORAI2,SLC3A2,SLC30A6,SLC8A2,SLC9A1,ATP2C1,TS…
GO: Biological Process	GO:0030003	cellular cation homeostasis		2.507e-12	2.042e-08	2.347e-10	2.249e-09	112	593	AQP11,SLC24A3,ADCYAP1R1,SLC12A5,ADRA1D,ADRA1B,STIM2,APLP2,APP,ASPH,ATP1A1,ATP1A3,ATP1B1,ATP2B1,ATP2B2,ATP2B3,ATP2B4,ATP6V0B,ATP6V0A1,BMP4,CACNA1I,CACNA1G,NMB,CACNA1A,CACNA1C,CACNA2D1,NPY1R,NPY2R,CALCA,ATP6V0E1,CALR,NTSR1,NUCB2,ATP13A5,CCKBR,OPRL1,P2RX4,PDGFRA,CLCN3,SLC24A2,CLN3,CLN5,SLC39A6,GSTO1,SLC4A7,CP,SLC30A7,PPT1,HERPUD1,PRNP,CYBA,TRPM4,PSEN1,PSEN2,CD55,PTH1R,SLC26A8,SV2A,ATP2C2,CLN6,ATP13A…
GO: Biological Process	GO:0072511	divalent inorganic cation transport		3.389e-12	2.761e-08	3.137e-10	3.006e-09	93	459	SLC24A3,ADCYAP1R1,ADRB1,STIM2,ASPH,ATP1B1,ATP2B1,ATP2B2,ATP2B3,ATP2B4,BMP4,TSPO,CACNA1I,CACNA1H,CACNA1G,NIPA1,NPY,CACNA1A,CACNA1B,CACNA1C,CACNA2D1,CALCA,NTSR1,OPRL1,P2RX4,PDGFRB,CBARP,CHRNB2,SELENOK,NALCN,SLC24A2,SLC39A6,GSTO1,SLC39A3,SLC30A7,CTGF,CYBA,TRPM4,CNNM2,PSEN1,PSEN2,PTGS2,ATP2C2,CNNM4,CACNG8,RAMP1,SLC39A9,NPSR1,MAGT1,TRPV2,CXCL12,STOML2,CREB3,ORAI2,SLC3A2,SLC30A6,SLC8A2,SLC9A1,ATP2C1,TS…
GO: Biological Process	GO:0010977	negative regulation of neuron projection development		3.765e-12	3.067e-08	3.446e-10	3.303e-09	45	152	MAG,SEMA7A,NRP1,OMG,SLIT2,NLGN3,SEMA3E,PSEN1,SEMA4C,KIAA0319,PTPRO,NTM,EFNA1,EPHA3,EPHA4,SEZ6,EPHA7,EPHB2,RYK,EFEMP1,SEMA6C,SEMA3F,SEMA6B,SEMA4F,SEMA4D,SEMA4B,SEMA3C,NLGN1,SLIT1,SPOCK1,SPP1,FSTL4,SEMA4A,THY1,LINGO1,KLK8,TNR,HLA-A,WNT5A,IFRD1,IL15RA,RTN4R,RGMA,ITM2C,LRP1
GO: Biological Process	GO:0050890	cognition		3.895e-12	3.173e-08	3.526e-10	3.379e-09	70	304	MAN2B1,ADCY8,SLC12A5,FZD9,ADRA1B,ADRB1,AMFR,APP,ATP1A3,ADGRB3,NCAM1,BDNF,CACNA1C,NPTX2,NTRK2,NTSR1,NOG,CHRM1,CHRNB2,NLGN3,NRXN3,NRXN1,NRXN2,SLC24A2,CLN3,CYP7B1,CHST10,COMT,CRHBP,PPT1,CNTNAP2,CTNS,PRNP,RELN,PSEN1,PSEN2,PTGS2,KCNK4,DGCR2,DRD5,RASGRF1,EPHB2,CLN8,MAGT1,ATP8A1,POMK,SLC1A4,NPTN,SLC8A2,SORCS3,GABRA5,GM2A,GRIA1,GRIN1,GRIN2B,GRM5,GRM7,ATAD1,KLK8,CLDN5,TNR,HMGCR,VDAC3,VIP,VLDLR,HTR6,ITGA3,…
GO: Biological Process	GO:0007611	learning or memory		3.993e-12	3.253e-08	3.575e-10	3.425e-09	65	272	MAN2B1,ADCY8,SLC12A5,FZD9,ADRA1B,ADRB1,AMFR,APP,ATP1A3,ADGRB3,NCAM1,BDNF,CACNA1C,NPTX2,NTRK2,NTSR1,NOG,CHRNB2,NLGN3,NRXN3,NRXN1,NRXN2,SLC24A2,CLN3,CYP7B1,CHST10,COMT,CRHBP,PPT1,CNTNAP2,CTNS,PRNP,RELN,PSEN1,PSEN2,PTGS2,KCNK4,DRD5,RASGRF1,EPHB2,CLN8,ATP8A1,POMK,NPTN,SLC8A2,SORCS3,GABRA5,GM2A,GRIA1,GRIN1,GRIN2B,GRM5,GRM7,ATAD1,KLK8,CLDN5,TNR,HMGCR,VDAC3,VIP,VLDLR,HTR6,ITGA3,SLC17A7,KIT
GO: Biological Process	GO:0032527	protein exit from endoplasmic reticulum		4.988e-12	4.064e-08	4.417e-10	4.233e-09	21	39	AUP1,DERL1,TMED9,EDEM1,HERPUD1,DERL2,BCAP31,UBAC2,TMEM129,SEL1L,EDEM2,TMEM30A,SYVN1,SORL1,SELENOS,ERLEC1,SURF4,OS9,HSP90B1,HM13,LMAN1
GO: Biological Process	GO:0061387	regulation of extent of cell growth		1.066e-11	8.687e-08	9.341e-10	8.951e-09	38	118	ISLR2,SEMA7A,BDNF,NRP1,NRCAM,NTRK3,OMG,SLIT2,PLXNA1,PLXNA2,PLXNA4,SEMA3E,SEMA4C,DSCAM,MEGF8,PLXNC1,EPHA7,RYK,TRPV2,CXCL12,SEMA6C,SEMA3F,SEMA6B,SEMA4F,SEMA4D,SEMA4B,SEMA3C,FN1,SLIT1,SPP1,FSTL4,SEMA4A,TNR,WNT5A,IFRD1,RTN4R,RGMA,L1CAM
GO: Biological Process	GO:0071526	semaphorin-plexin signaling pathway		1.467e-11	1.195e-07	1.271e-09	1.218e-08	20	37	MET,SEMA7A,NRP2,NRP1,PLXNA1,PLXNA2,PLXNA4,SEMA3E,SEMA4C,PLXNC1,SEMA6C,SEMA3F,SEMA6B,SEMA4F,SEMA4D,FLNA,SEMA4B,SEMA3C,SEMA4A,PLXNB2
GO: Biological Process	GO:0006517	protein deglycosylation		1.776e-11	1.447e-07	1.523e-09	1.459e-08	15	21	MAN2A2,MAN2A1,MAN2B1,EDEM1,DERL2,SEL1L,EDEM3,EDEM2,UGGT2,SYVN1,OS9,MAN2B2,MAN1B1,PARK7,UGGT1
GO: Biological Process	GO:0050767	regulation of neurogenesis		2.143e-11	1.746e-07	1.818e-09	1.743e-08	135	788	MAG,MAN2A1,ACHE,AMIGO1,MET,KIDINS220,JAG1,NLGN2,ISLR2,SEMA7A,LRRC4C,APP,CAPRIN2,BRINP2,ADGRB3,BDNF,NRP1,BMP4,BMP7,NEU1,TSPO,VWC2L,SDK1,CACNA1A,CNTN4,NRCAM,CALR,NTRK2,NTRK3,OMG,CDH2,NOG,CHRNB2,SLIT2,NLGN3,PLXNA1,PLXNA2,CNTN1,COL3A1,TMEM106B,TENM4,PLXNA4,SEMA3E,RELN,KLK6,PSEN1,BRINP1,CASZ1,PTK7,SEMA4C,KIAA0319,PTPRA,PTPRD,PTPRO,NTM,NDNF,DSCAM,EFNA1,MEGF8,PLXNC1,ROBO1,ROBO2,EPHA3,EPHA4,SEZ6,EPHA7,EP…
GO: Biological Process	GO:0042330	taxis		2.772e-11	2.258e-07	2.328e-09	2.231e-08	107	578	MATN2,ADAM10,TENM2,UNC5A,MET,NLGN2,ABCC1,SEMA7A,APP,UNC5C,NCAM1,BDNF,NRP2,NRP1,BMP4,BMP7,NEO1,NFIB,CNTN4,CALCA,NRCAM,CALR,NTRK3,CDH13,NOG,PDGFRA,PDGFRB,SLIT2,NRXN3,NRXN1,PLAU,ACKR2,PLP2,PLXNA1,PLXNA2,CXCL14,PLXNA4,CXADR,SEMA3E,BOC,TRPM4,RELN,DAG1,SEMA4C,PTPRA,PTPRJ,PTPRM,PTPRO,NECTIN1,DSCAM,HBEGF,EFNA1,EFNA2,MEGF8,PLXNC1,ROBO1,ROBO2,EPHA3,EPHA4,EPHA5,EPHA7,EPHA8,EPHB1,EPHB2,EPHB3,EXT1,RYK,SCN1B,F…
GO: Biological Process	GO:0034765	regulation of ion transmembrane transport		2.976e-11	2.424e-07	2.474e-09	2.371e-08	90	455	KCNH7,AMIGO1,ADRB1,NLGN2,STIM2,DPP10,HCN3,ASPH,ATP1B1,ATP2B4,FXYD5,BMP4,CACNA1I,CACNA1H,CACNA1G,CACNA1A,CACNA1B,CACNA1C,CACNA2D1,HCN1,NTSR1,OPRL1,PDGFRB,CBARP,KCNB2,NLGN3,CLCN2,CLCN3,CLCN4,CLCN6,CLCN7,NRXN1,NALCN,STOML1,TMEM109,GSTO1,CRHBP,CTSS,PRNP,CYBA,RELN,KCNK4,KCNG2,ATP2C2,DPP6,RASGRF1,CACNG8,NPSR1,SCN1A,SCN1B,SCN2A,SCN7A,SCN8A,TRPV2,CXCL12,GPR89B,NLGN1,KCNV1,SLC9A1,TSPAN13,CACNA2D3,ACSL5,SC…
GO: Biological Process	GO:0055065	metal ion homeostasis		3.131e-11	2.551e-07	2.577e-09	2.469e-08	109	594	SLC24A3,ADCYAP1R1,ADRA1D,ADRA1B,STIM2,APLP2,APP,ASPH,ATP1A1,ATP1A3,ATP1B1,ATP2B1,ATP2B2,ATP2B3,ATP2B4,HYAL2,BMP4,NEO1,CACNA1I,CACNA1G,NMB,CACNA1A,SFXN4,CACNA1C,CACNA2D1,NPY1R,NPY2R,CALCA,CALR,NTSR1,NUCB2,ATP13A5,CCKBR,OPRL1,P2RX4,PDGFRA,SLC24A2,CLN3,SLC39A6,GSTO1,COMT,CP,SLC30A7,FAM20A,HERPUD1,PRNP,CYBA,TRPM4,CNNM2,PSEN1,PSEN2,CD55,PTH1R,SV2A,ATP2C2,ATP13A3,RIC3,DRD5,CUTC,CNNM4,BCAP31,SYPL2,STEAP…
GO: Biological Process	GO:0006935	chemotaxis		4.95e-11	4.033e-07	4.033e-09	3.864e-08	106	576	MATN2,ADAM10,TENM2,UNC5A,MET,ABCC1,SEMA7A,APP,UNC5C,NCAM1,BDNF,NRP2,NRP1,BMP4,BMP7,NEO1,NFIB,CNTN4,CALCA,NRCAM,CALR,NTRK3,CDH13,NOG,PDGFRA,PDGFRB,SLIT2,NRXN3,NRXN1,PLAU,ACKR2,PLP2,PLXNA1,PLXNA2,CXCL14,PLXNA4,CXADR,SEMA3E,BOC,TRPM4,RELN,DAG1,SEMA4C,PTPRA,PTPRJ,PTPRM,PTPRO,NECTIN1,DSCAM,HBEGF,EFNA1,EFNA2,MEGF8,PLXNC1,ROBO1,ROBO2,EPHA3,EPHA4,EPHA5,EPHA7,EPHA8,EPHB1,EPHB2,EPHB3,EXT1,RYK,SCN1B,FGFR1,C…
GO: Biological Process	GO:0072507	divalent inorganic cation homeostasis		5.47e-11	4.457e-07	4.413e-09	4.229e-08	90	460	SLC24A3,ADCYAP1R1,ADRA1D,ADRA1B,STIM2,APP,ASPH,ATP1B1,ATP2B1,ATP2B2,ATP2B3,ATP2B4,BMP4,CACNA1I,CACNA1G,NMB,CACNA1A,CACNA1C,CACNA2D1,NPY1R,NPY2R,CALCA,CALR,NTSR1,NUCB2,ATP13A5,CCKBR,OPRL1,P2RX4,PDGFRA,SLC24A2,CLN3,SLC39A6,GSTO1,SLC30A7,FAM20A,HERPUD1,CYBA,TRPM4,CNNM2,PSEN1,PSEN2,CD55,PTH1R,SV2A,ATP2C2,ATP13A3,RIC3,DRD5,CNNM4,BCAP31,SYPL2,NPSR1,CXCL12,STOML2,CIB2,CLSTN1,SLC30A6,NPTN,SLC8A2,ATP2C1,S…
GO: Biological Process	GO:0006665	sphingolipid metabolic process		5.845e-11	4.762e-07	4.668e-09	4.474e-08	43	152	SERINC1,PPM1L,DEGS1,ARSA,ASAH1,NEU1,ST3GAL5,SGPL1,CERS5,HACD1,LARGE1,CLN3,ST8SIA5,CTSA,PPT1,PSAP,CLN6,CLN8,ACER3,ARSK,ST3GAL6,SPTLC1,ST3GAL3,SMPD1,KDSR,TEX2,GBA,SMPDL3B,GLA,GLB1,SUMF1,GM2A,SERINC3,TNFRSF1A,HEXA,PLA2G15,UGCG,UGT8,ASAH2,ITGB8,KIT,ORMDL3,ST6GALNAC5
GO: Biological Process	GO:1904380	endoplasmic reticulum mannose trimming		7.845e-11	6.391e-07	6.205e-09	5.946e-08	10	10	EDEM1,DERL2,SEL1L,EDEM3,EDEM2,UGGT2,SYVN1,OS9,MAN1B1,UGGT1
GO: Biological Process	GO:0030516	regulation of axon extension		8.109e-11	6.607e-07	6.353e-09	6.087e-08	34	104	ISLR2,SEMA7A,BDNF,NRP1,NRCAM,NTRK3,SLIT2,PLXNA1,PLXNA2,PLXNA4,SEMA3E,SEMA4C,DSCAM,MEGF8,PLXNC1,RYK,TRPV2,CXCL12,SEMA6C,SEMA3F,SEMA6B,SEMA4F,SEMA4D,SEMA4B,SEMA3C,FN1,SLIT1,FSTL4,SEMA4A,TNR,WNT5A,IFRD1,RTN4R,L1CAM
GO: Biological Process	GO:1902668	negative regulation of axon guidance		8.828e-11	7.192e-07	6.815e-09	6.53e-08	17	29	SEMA7A,NRP1,SLIT2,SEMA3E,SEMA4C,PTPRO,RYK,SEMA6C,SEMA3F,SEMA6B,SEMA4F,SEMA4D,SEMA4B,SEMA3C,SLIT1,SEMA4A,WNT5A
GO: Biological Process	GO:0045664	regulation of neuron differentiation		8.867e-11	7.224e-07	6.815e-09	6.53e-08	116	657	MAG,ACHE,AMIGO1,MET,KIDINS220,JAG1,NLGN2,ISLR2,SEMA7A,LRRC4C,APP,CAPRIN2,BRINP2,ADGRB3,BDNF,NRP1,BMP4,BMP7,NEU1,VWC2L,SDK1,CACNA1A,CNTN4,NRCAM,CALR,NTRK2,NTRK3,OMG,CDH2,NOG,CHRNB2,SLIT2,NLGN3,PLXNA1,PLXNA2,CNTN1,TMEM106B,PLXNA4,SEMA3E,RELN,KLK6,PSEN1,BRINP1,CASZ1,PTK7,SEMA4C,KIAA0319,PTPRD,PTPRO,NTM,NDNF,DSCAM,EFNA1,MEGF8,PLXNC1,ROBO1,ROBO2,EPHA3,EPHA4,SEZ6,EPHA7,EPHB2,EPHB3,RYK,EFEMP1,SCN1B,TRPV…
GO: Biological Process	GO:0048675	axon extension		1.086e-10	8.849e-07	8.198e-09	7.856e-08	39	132	ISLR2,SEMA7A,NDN,BDNF,NRP2,NRP1,NRCAM,NTRK3,SLIT2,NLGN3,PLXNA1,PLXNA2,PLXNA4,SEMA3E,SEMA4C,DSCAM,MEGF8,PLXNC1,RYK,TRPV2,SLC9A6,CXCL12,SEMA6C,SEMA3F,SEMA6B,SEMA4F,SEMA4D,SEMA4B,SEMA3C,FN1,SLIT1,SLIT3,FSTL4,SEMA4A,TNR,WNT5A,IFRD1,RTN4R,L1CAM
GO: Biological Process	GO:0034762	regulation of transmembrane transport		1.087e-10	8.854e-07	8.198e-09	7.856e-08	91	473	KCNH7,AMIGO1,ADRB1,NLGN2,STIM2,DPP10,HCN3,ASPH,ATP1B1,ATP2B4,FXYD5,BMP4,CACNA1I,CACNA1H,CACNA1G,CACNA1A,CACNA1B,CACNA1C,CACNA2D1,HCN1,NTSR1,OPRL1,PDGFRB,CBARP,KCNB2,NLGN3,CLCN2,CLCN3,CLCN4,CLCN6,CLCN7,NRXN1,NALCN,STOML1,TMEM109,GSTO1,CRHBP,CTSS,PRNP,CYBA,RELN,KCNK4,KCNG2,ATP2C2,DPP6,RASGRF1,CACNG8,NPSR1,SCN1A,SCN1B,SCN2A,SCN7A,SCN8A,TRPV2,CXCL12,GPR89B,NLGN1,KCNV1,SLC9A1,TSPAN13,CACNA2D3,ACSL5,SC…
GO: Biological Process	GO:0006029	proteoglycan metabolic process		1.231e-10	1.003e-06	9.198e-09	8.814e-08	31	90	NDST2,NDST3,CHPF2,DSE,GLCE,HS2ST1,VCAN,SPOCK2,CHPF,NDNF,CHSY3,DSEL,EXT1,EXT2,EXTL1,EXTL2,EXTL3,CSGALNACT2,CHST12,PXYLP1,CSPG5,EGFLAM,XYLT2,SULF2,SULF1,GPC1,CHST8,HEXA,B4GALT7,CHST7,GAL3ST3
GO: Biological Process	GO:1990138	neuron projection extension		1.253e-10	1.021e-06	9.278e-09	8.891e-08	45	167	ISLR2,SEMA7A,NDN,BDNF,NRP2,NRP1,DDR1,NRCAM,NTRK3,SLIT2,NLGN3,PLXNA1,PLXNA2,PLXNA4,SEMA3E,SEMA4C,DSCAM,MEGF8,PLXNC1,RYK,TRPV2,SLC9A6,CXCL12,SEMA6C,SEMA3F,SEMA6B,SEMA4F,SEMA4D,SEMA4B,SEMA3C,FN1,SYT3,SLIT1,SLIT3,FSTL4,SYT1,SYT4,SEMA4A,TNR,FLRT3,FLRT1,WNT5A,IFRD1,RTN4R,L1CAM
GO: Biological Process	GO:0031345	negative regulation of cell projection organization		1.284e-10	1.046e-06	9.422e-09	9.029e-08	47	179	MAG,SEMA7A,NRP1,OMG,SLIT2,NLGN3,NRXN1,SEMA3E,PSEN1,SEMA4C,KIAA0319,PTPRO,NTM,EFNA1,EPHA3,EPHA4,SEZ6,EPHA7,EPHB2,RYK,EFEMP1,SEMA6C,SEMA3F,SEMA6B,SEMA4F,SEMA4D,SEMA4B,SEMA3C,NLGN1,SLIT1,SPOCK1,SPP1,FSTL4,SEMA4A,THY1,LINGO1,KLK8,TNR,HLA-A,WNT5A,IFRD1,IL15RA,RTN4R,ITGA3,RGMA,ITM2C,LRP1
GO: Biological Process	GO:0044255	cellular lipid metabolic process		1.387e-10	1.13e-06	1.009e-08	9.666e-08	167	1066	ACHE,ABHD6,SERINC1,PPM1L,ABCC1,FAM213B,RDH14,DGKE,DEGS1,ARSA,ASAH1,DGAT1,B4GALT4,GPAA1,CDS2,NAGA,LPCAT4,NDUFAB1,NEU1,ST3GAL5,SGPL1,DAGLA,DAGLB,NUCB2,CCKBR,CERS5,PAM,CD81,HACD1,LARGE1,PDGFRA,PDGFRB,PIGC,PIGH,CLN3,PI4KA,ALG5,PLA2G4A,ALG8,ST8SIA5,KDELC1,ALG6,EIF2AK3,ALG12,MBOAT7,TECR,PTGES,NRG2,POR,CTSA,ABCG1,PPT1,SDC3,FITM2,ABHD12,PSAP,PTDSS1,PIGG,RETSAT,PLPPR1,PTGS2,ELOVL2,PLPPR4,LPCAT2,PIGX,CLN6,…
GO: Biological Process	GO:0006986	response to unfolded protein		1.573e-10	1.281e-06	1.134e-08	1.087e-07	46	174	DNAJB9,AMFR,MBTPS1,CALR,CREB3L1,STT3B,SRPRB,TPP1,EIF2AK3,POMT2,DERL1,EDEM1,DNAJC3,HERPUD1,FBXO6,DERL2,TBL2,RNF121,BFAR,EXTL3,TMEM129,MBTPS2,SDF2,CREB3,HYOU1,JKAMP,POMT1,EDEM3,EDEM2,SYVN1,DNAJB11,SELENOS,ERP44,SRPRA,SSR1,MYDGF,TMBIM6,PPP1R15B,SEC62,SEC63,HSP90B1,HSPA5,WFS1,UPF3A,UBE2J2,MANF
GO: Biological Process	GO:0030030	cell projection organization		1.674e-10	1.363e-06	1.196e-08	1.146e-07	210	1427	MAG,TMEM17,ZFYVE27,ACHE,MATN2,TENM2,DSCAML1,SLITRK1,AMIGO1,SLC12A5,UNC5A,MET,LRFN2,KIDINS220,NLGN2,MMP2,RSPH9,ISLR2,LRFN1,SEMA7A,IFT81,CNTNAP1,LRRC4C,APP,UNC5C,CAPRIN2,ATP2B2,ADGRB1,ADGRB3,FXYD5,NCAM1,NDN,BDNF,NRP2,NRP1,BMP4,BMP7,NEO1,NEU1,NFIB,TSPO,SDK1,NPY,CACNA1A,CNTN4,DDR1,NPTX1,NRCAM,NTRK2,NTRK3,WHAMM,OMD,OMG,CCK,CD44,CDH2,CDH11,CDH13,NOG,CHRNB2,SLIT2,NLGN3,LRFN4,NRXN3,NRXN1,CLU,CLN3,PLXNA1,…
GO: Biological Process	GO:0007612	learning		1.885e-10	1.536e-06	1.336e-08	1.28e-07	44	163	SLC12A5,ADRA1B,APP,ATP1A3,ADGRB3,BDNF,CACNA1C,NPTX2,NTRK2,NTSR1,NOG,CHRNB2,NLGN3,NRXN3,NRXN1,NRXN2,SLC24A2,CLN3,CHST10,COMT,PPT1,CNTNAP2,CTNS,RELN,PTGS2,DRD5,EPHB2,CLN8,ATP8A1,NPTN,SLC8A2,SORCS3,GABRA5,GRIN1,GRIN2B,GRM5,GRM7,ATAD1,CLDN5,TNR,HMGCR,VDAC3,HTR6,KIT
GO: Biological Process	GO:0040011	locomotion		2.127e-10	1.733e-06	1.494e-08	1.431e-07	246	1740	MAG,MATN2,ABHD6,ACVR1,ACVR1B,ADAM10,TENM2,UNC5A,MET,JAG1,NLGN2,MMP2,MMP14,RSPH9,MRC1,ABCC1,SEMA7A,IFITM1,APP,UNC5C,PODN,ASTN1,ATP1B1,ATP2B2,ATP2B4,HYAL2,ADAM15,ADAM9,NCAM1,NDN,BDNF,NRP2,NRP1,BMP4,BMP7,NEO1,BSG,NFIB,SGPL1,TSPO,CACNA1I,BMPER,CNTN4,DDR1,CALCA,NRCAM,CALR,NTRK2,NTRK3,CAV2,CCK,SLC16A3,P4HB,CD34,FURIN,SCARB2,CD44,CD47,CD81,CDH2,CDH13,XPR1,NOG,PDGFRA,PDGFRB,WNT4,CHRM1,CHRM4,SLIT2,SELENOK…
GO: Biological Process	GO:0072503	cellular divalent inorganic cation homeostasis		2.559e-10	2.085e-06	1.782e-08	1.707e-07	85	437	SLC24A3,ADCYAP1R1,ADRA1D,ADRA1B,STIM2,APP,ASPH,ATP1B1,ATP2B1,ATP2B2,ATP2B3,ATP2B4,BMP4,CACNA1I,CACNA1G,NMB,CACNA1A,CACNA1C,CACNA2D1,NPY1R,NPY2R,CALCA,CALR,NTSR1,NUCB2,ATP13A5,CCKBR,OPRL1,P2RX4,PDGFRA,SLC24A2,CLN3,SLC39A6,GSTO1,SLC30A7,HERPUD1,CYBA,TRPM4,PSEN1,PSEN2,CD55,PTH1R,SV2A,ATP2C2,ATP13A3,RIC3,DRD5,BCAP31,SYPL2,NPSR1,CXCL12,STOML2,CIB2,CLSTN1,SLC30A6,NPTN,SLC8A2,ATP2C1,SLC37A4,TMEM165,MCHR…
GO: Biological Process	GO:0030968	endoplasmic reticulum unfolded protein response		2.653e-10	2.161e-06	1.832e-08	1.755e-07	38	130	DNAJB9,AMFR,MBTPS1,CALR,CREB3L1,SRPRB,TPP1,EIF2AK3,POMT2,DERL1,EDEM1,DNAJC3,HERPUD1,DERL2,TBL2,RNF121,BFAR,EXTL3,MBTPS2,SDF2,CREB3,HYOU1,POMT1,EDEM3,EDEM2,SYVN1,DNAJB11,SELENOS,SRPRA,SSR1,MYDGF,TMBIM6,PPP1R15B,SEC62,SEC63,HSP90B1,HSPA5,WFS1
GO: Biological Process	GO:0010769	regulation of cell morphogenesis involved in differentiation		3.248e-10	2.646e-06	2.224e-08	2.131e-07	76	375	MAG,ACHE,AMIGO1,MET,ISLR2,SEMA7A,VASN,LRRC4C,CAPRIN2,ADGRB3,BDNF,NRP1,CACNA1A,NRCAM,CALR,NTRK2,NTRK3,OMG,CDH2,CHRNB2,SLIT2,NLGN3,BAMBI,PLXNA1,PLXNA2,COL1A1,PLXNA4,SEMA3E,RELN,PSEN1,DAG1,SEMA4C,PTPRD,PTPRO,DSCAM,EFNA1,MEGF8,PLXNC1,ROBO1,ROBO2,EPHA3,EPHA4,EPHA7,EPHB2,EPHB3,RYK,TRPV2,CXCL12,SEMA6C,SEMA3F,SEMA6B,SEMA4F,SEMA4D,FLNA,SEMA4B,SEMA3C,SFRP2,FN1,NLGN1,SLIT1,SLIT3,SPP1,FSTL4,SEMA4A,GRIN1,IL1R…
GO: Biological Process	GO:0035249	synaptic transmission, glutamatergic		3.283e-10	2.675e-06	2.229e-08	2.136e-07	29	83	NLGN2,CACNA1A,NPY2R,NTRK2,CCKBR,CDH8,NLGN3,CLCN3,NRXN1,PLAT,RELN,CLSTN3,PSEN1,PTGS2,NLGN1,SLC1A4,SYT1,GRIA4,GRIK1,GRIK2,GRIK5,GRIN1,GRM2,GRM5,GRM7,GRM8,ATAD1,TNR,SLC17A7
GO: Biological Process	GO:0035966	response to topologically incorrect protein		3.521e-10	2.869e-06	2.371e-08	2.272e-07	47	184	DNAJB9,AMFR,MBTPS1,CALR,CREB3L1,STT3B,SRPRB,CLU,TPP1,EIF2AK3,POMT2,DERL1,EDEM1,DNAJC3,HERPUD1,FBXO6,DERL2,TBL2,RNF121,BFAR,EXTL3,TMEM129,MBTPS2,SDF2,CREB3,HYOU1,JKAMP,POMT1,EDEM3,EDEM2,SYVN1,DNAJB11,SELENOS,ERP44,SRPRA,SSR1,MYDGF,TMBIM6,PPP1R15B,SEC62,SEC63,HSP90B1,HSPA5,WFS1,UPF3A,UBE2J2,MANF
GO: Biological Process	GO:0006865	amino acid transport		4.406e-10	3.59e-06	2.942e-08	2.82e-07	44	167	SERINC1,PEX3,SLC7A14,SLC17A8,BDNF,CACNA1A,NPY5R,NTRK2,NTSR1,CCK,CLN3,CTNS,PSEN1,SLC38A10,SLC6A15,SLC17A5,CLN8,ARL6IP5,SLC19A2,SLC1A1,SLC1A4,SLC1A6,SLC3A2,PDPN,SLC6A7,SLC7A1,SLC7A4,SLC15A4,SLC19A1,GABBR1,ARL6IP1,SYT1,SERINC3,GRIK1,GRIN2B,GRM2,GRM7,SLC7A8,SLC7A3,TRPC4,HTR6,SLC6A17,SLC17A7,SLC7A5
GO: Biological Process	GO:0018279	protein N-linked glycosylation via asparagine		5.006e-10	4.078e-06	3.316e-08	3.177e-07	19	39	MGAT2,MCFD2,ST3GAL5,STT3B,OSTC,ALG5,DAD1,RPN1,RPN2,MAGT1,ST3GAL6,NUDT14,ST3GAL3,SYVN1,FUT8,STT3A,TUSC3,LMAN1,ST6GALNAC5
GO: Biological Process	GO:0008610	lipid biosynthetic process		5.181e-10	4.221e-06	3.404e-08	3.262e-07	115	668	ACHE,ABHD6,ADORA2B,SERINC1,PPM1L,FAM213B,DGKE,DEGS1,ATP1A1,DGAT1,GPAA1,CDS2,LPCAT4,NDUFAB1,ST3GAL5,SGPL1,TSPO,CACNA1H,CERS5,HACD1,LARGE1,WNT4,PIGC,PIGH,PI4KA,ALG5,PLA2G4A,CYP7B1,ST8SIA5,MBOAT7,TECR,PTGES,POR,ABCG1,FITM2,CYP51A1,PTDSS1,PIGG,PTGS2,ELOVL2,LPCAT2,DHCR7,PIGX,DHCR24,DPAGT1,SRD5A3,PIGK,PIGU,HSD17B11,FBXW7,CLN8,LPCAT1,AGPAT5,ACER3,SH3YL1,ACSL3,ACSL4,CEPT1,ST3GAL6,PGAP1,CDIPT,FGFR1,HACD3,…
GO: Biological Process	GO:0030970	retrograde protein transport, ER to cytosol		5.414e-10	4.41e-06	3.528e-08	3.381e-07	16	28	AUP1,DERL1,EDEM1,HERPUD1,DERL2,BCAP31,UBAC2,TMEM129,SEL1L,EDEM2,SYVN1,SELENOS,ERLEC1,OS9,HSP90B1,HM13
GO: Biological Process	GO:0034620	cellular response to unfolded protein		5.497e-10	4.479e-06	3.554e-08	3.406e-07	38	133	DNAJB9,AMFR,MBTPS1,CALR,CREB3L1,SRPRB,TPP1,EIF2AK3,POMT2,DERL1,EDEM1,DNAJC3,HERPUD1,DERL2,TBL2,RNF121,BFAR,EXTL3,MBTPS2,SDF2,CREB3,HYOU1,POMT1,EDEM3,EDEM2,SYVN1,DNAJB11,SELENOS,SRPRA,SSR1,MYDGF,TMBIM6,PPP1R15B,SEC62,SEC63,HSP90B1,HSPA5,WFS1
GO: Biological Process	GO:0071804	cellular potassium ion transport		6.474e-10	5.274e-06	4.12e-08	3.949e-07	46	181	KCNH7,AMIGO1,SLC12A5,KCNT1,DPP10,HCN3,ATP1A1,ATP1A3,ATP1B1,HCN1,KCNB2,TMEM38A,CNGA4,PRNP,KCNK4,KCNG2,DPP6,TMEM38B,TMEM175,KCNV1,SLC12A4,SLC12A7,KCNH5,ABCC8,SLC9A8,KCNH3,AGRN,KCNQ5,HTR3A,KCNK12,KCNT2,KCNA1,KCNA2,KCNC1,SLC12A9,KCNC3,KCNC4,KCNF1,KCNH2,KCNJ4,KCNJ9,KCNJ11,KCNN1,KCNN2,KCNS1,KCNS3
GO: Biological Process	GO:0071805	potassium ion transmembrane transport		6.474e-10	5.274e-06	4.12e-08	3.949e-07	46	181	KCNH7,AMIGO1,SLC12A5,KCNT1,DPP10,HCN3,ATP1A1,ATP1A3,ATP1B1,HCN1,KCNB2,TMEM38A,CNGA4,PRNP,KCNK4,KCNG2,DPP6,TMEM38B,TMEM175,KCNV1,SLC12A4,SLC12A7,KCNH5,ABCC8,SLC9A8,KCNH3,AGRN,KCNQ5,HTR3A,KCNK12,KCNT2,KCNA1,KCNA2,KCNC1,SLC12A9,KCNC3,KCNC4,KCNF1,KCNH2,KCNJ4,KCNJ9,KCNJ11,KCNN1,KCNN2,KCNS1,KCNS3
GO: Biological Process	GO:0051961	negative regulation of nervous system development		6.553e-10	5.338e-06	4.138e-08	3.966e-07	66	311	MAG,JAG1,SEMA7A,APP,BDNF,NRP1,BMP4,BMP7,TSPO,CNTN4,CALR,NTRK3,OMG,NOG,SLIT2,NLGN3,EIF2AK3,COL3A1,CPE,SEMA3E,PSEN1,BRINP1,CASZ1,SEMA4C,KIAA0319,PTPRO,NTM,EFNA1,ROBO2,EPHA3,EPHA4,SEZ6,EPHA7,EPHB2,RYK,EFEMP1,SEMA6C,SEMA3F,SEMA6B,SEMA4F,SEMA4D,SEMA4B,SEMA3C,NLGN1,SLIT1,SORL1,SPOCK1,SPP1,FSTL4,TNFRSF21,SEMA4A,GPR161,THY1,LINGO1,KLK8,TNR,HLA-A,WNT5A,WNT7B,IFRD1,IL15RA,RTN4R,RGMA,TRIM11,ITM2C,LRP1
GO: Biological Process	GO:0006875	cellular metal ion homeostasis		6.823e-10	5.559e-06	4.276e-08	4.097e-07	95	519	SLC24A3,ADCYAP1R1,ADRA1D,ADRA1B,STIM2,APLP2,APP,ASPH,ATP1A1,ATP1A3,ATP1B1,ATP2B1,ATP2B2,ATP2B3,ATP2B4,BMP4,CACNA1I,CACNA1G,NMB,CACNA1A,CACNA1C,CACNA2D1,NPY1R,NPY2R,CALCA,CALR,NTSR1,NUCB2,ATP13A5,CCKBR,OPRL1,P2RX4,PDGFRA,SLC24A2,CLN3,SLC39A6,GSTO1,CP,SLC30A7,HERPUD1,PRNP,CYBA,TRPM4,PSEN1,PSEN2,CD55,PTH1R,SV2A,ATP2C2,ATP13A3,RIC3,DRD5,BCAP31,SYPL2,NPSR1,SLC22A17,CXCL12,STOML2,CIB2,CLSTN1,SLC30A6,NP…
GO: Biological Process	GO:0007417	central nervous system development		8.522e-10	6.943e-06	5.3e-08	5.079e-07	157	1009	MAG,MAS1,ACVR1B,DSCAML1,MET,PCDH19,ATRN,SEMA7A,APLP2,APP,ADAM22,ARSA,UNC5C,SLC17A8,ATP2B1,ATP2B2,ATP2B4,ADAM23,NAGLU,NCAM1,NDN,NDUFS4,NRP2,NRP1,BMP4,NFIB,BTD,NPY,CACNA1A,CNTN4,NPTX1,NRCAM,NTRK2,NTRK3,OMG,CD9,SYNGR3,PAM,SNTG2,CDH2,PCDH9,CDH11,NOG,WNT4,CHRNB2,ABCB1,SLIT2,NLGN3,SERPINI1,NRXN1,CLU,TPP1,CLN5,PLXNA2,CNTN1,COL3A1,DDIT4,SLC4A7,MBOAT7,TSKU,TENM4,PPT1,VCAN,CNTNAP2,PLXNA4,SLITRK5,CTNS,RELN,…
GO: Biological Process	GO:1903510	mucopolysaccharide metabolic process		8.636e-10	7.036e-06	5.312e-08	5.09e-07	35	118	NDST2,CHST1,HYAL2,B4GALT4,OMD,CD44,B4GALT5,NDST3,CHPF2,CHST2,DSE,GLCE,HS2ST1,VCAN,SPOCK2,CHPF,NDNF,ABCC5,CHSY3,DSEL,CSGALNACT2,ST3GAL6,CHST12,ST3GAL3,SLC9A1,CSPG5,EGFLAM,GALNS,XYLT2,GLB1,GNS,B4GAT1,HEXA,CHST7,CEMIP
GO: Biological Process	GO:0018196	peptidyl-asparagine modification		8.671e-10	7.064e-06	5.312e-08	5.09e-07	19	40	MGAT2,MCFD2,ST3GAL5,STT3B,OSTC,ALG5,DAD1,RPN1,RPN2,MAGT1,ST3GAL6,NUDT14,ST3GAL3,SYVN1,FUT8,STT3A,TUSC3,LMAN1,ST6GALNAC5
GO: Biological Process	GO:0031344	regulation of cell projection organization		9.352e-10	7.619e-06	5.686e-08	5.449e-07	113	659	MAG,ACHE,TENM2,AMIGO1,MET,KIDINS220,NLGN2,ISLR2,SEMA7A,LRRC4C,CAPRIN2,ADGRB3,BDNF,NRP1,BMP4,BMP7,NEU1,SDK1,CACNA1A,NRCAM,NTRK2,NTRK3,OMG,CDH2,CHRNB2,SLIT2,NLGN3,NRXN1,CLN3,PLXNA1,PLXNA2,CNTN1,TMEM106B,PLXNA4,SEMA3E,RELN,KLK6,PSEN1,PTK7,SEMA4C,KIAA0319,PTPRD,PTPRO,NTM,NDNF,DSCAM,EFNA1,MEGF8,PLXNC1,TENM1,ROBO1,ROBO2,EPHA3,EPHA4,SEZ6,EPHA7,EPHB2,EPHB3,RYK,SH3YL1,EFEMP1,SCN1B,TRPV2,FGFR1,CXCL12,SEMA6…
GO: Biological Process	GO:0007270	neuron-neuron synaptic transmission		1.224e-09	9.973e-06	7.388e-08	7.079e-07	41	154	NLGN2,BDNF,CACNA1A,NPY2R,NPY5R,NTRK2,CCKBR,CDH8,CHRNB2,NLGN3,CLCN3,NRXN1,PLAT,CRHBP,RELN,CLSTN3,PSEN1,PTGS2,DRD5,NLGN1,SLC1A4,GABRA1,GABRB3,GABRG2,GLRA2,GLRB,SYT1,GRIA4,GRIK1,GRIK2,GRIK5,GRIN1,GRM2,GRM5,GRM7,GRM8,ATAD1,TNR,PARK7,VDAC3,SLC17A7
GO: Biological Process	GO:0060560	developmental growth involved in morphogenesis		1.302e-09	1.061e-05	7.8e-08	7.474e-07	55	242	ISLR2,SEMA7A,APP,NDN,BDNF,NRP2,NRP1,BMP4,DDR1,NRCAM,NTRK3,OMG,SLIT2,NLGN3,PLXNA1,PLXNA2,PLXNA4,SEMA3E,PTK7,SEMA4C,DSCAM,MEGF8,PLXNC1,ROBO1,EPHA7,RYK,TRPV2,SLC9A6,CXCL12,SEMA6C,SEMA3F,SEMA6B,SEMA4F,SEMA4D,SEMA4B,SEMA3C,SFRP2,FN1,SYT3,SLIT1,SLIT3,SPP1,FSTL4,SYT1,SYT4,SEMA4A,TNR,FLRT3,FLRT1,WNT5A,WNT7B,IFRD1,RTN4R,RGMA,L1CAM
GO: Biological Process	GO:0030517	negative regulation of axon extension		1.364e-09	1.112e-05	8.113e-08	7.775e-07	20	45	SEMA7A,NRP1,SLIT2,SEMA3E,SEMA4C,RYK,SEMA6C,SEMA3F,SEMA6B,SEMA4F,SEMA4D,SEMA4B,SEMA3C,SLIT1,FSTL4,SEMA4A,TNR,WNT5A,IFRD1,RTN4R
GO: Biological Process	GO:0050768	negative regulation of neurogenesis		2.723e-09	2.218e-05	1.607e-07	1.54e-06	61	287	MAG,JAG1,SEMA7A,APP,BDNF,NRP1,BMP4,BMP7,TSPO,CNTN4,CALR,NTRK3,OMG,NOG,SLIT2,NLGN3,COL3A1,SEMA3E,PSEN1,BRINP1,CASZ1,SEMA4C,KIAA0319,PTPRO,NTM,EFNA1,EPHA3,EPHA4,SEZ6,EPHA7,EPHB2,RYK,EFEMP1,SEMA6C,SEMA3F,SEMA6B,SEMA4F,SEMA4D,SEMA4B,SEMA3C,NLGN1,SLIT1,SORL1,SPOCK1,SPP1,FSTL4,SEMA4A,THY1,LINGO1,KLK8,TNR,HLA-A,WNT5A,WNT7B,IFRD1,IL15RA,RTN4R,RGMA,TRIM11,ITM2C,LRP1
GO: Biological Process	GO:0048843	negative regulation of axon extension involved in axon guidance		3.236e-09	2.637e-05	1.897e-07	1.818e-06	15	27	SEMA7A,NRP1,SEMA3E,SEMA4C,RYK,SEMA6C,SEMA3F,SEMA6B,SEMA4F,SEMA4D,SEMA4B,SEMA3C,SLIT1,SEMA4A,WNT5A
GO: Biological Process	GO:0035967	cellular response to topologically incorrect protein		3.378e-09	2.752e-05	1.966e-07	1.883e-06	38	141	DNAJB9,AMFR,MBTPS1,CALR,CREB3L1,SRPRB,TPP1,EIF2AK3,POMT2,DERL1,EDEM1,DNAJC3,HERPUD1,DERL2,TBL2,RNF121,BFAR,EXTL3,MBTPS2,SDF2,CREB3,HYOU1,POMT1,EDEM3,EDEM2,SYVN1,DNAJB11,SELENOS,SRPRA,SSR1,MYDGF,TMBIM6,PPP1R15B,SEC62,SEC63,HSP90B1,HSPA5,WFS1
GO: Biological Process	GO:0048588	developmental cell growth		3.489e-09	2.842e-05	2.016e-07	1.932e-06	51	222	ADRB1,ISLR2,SEMA7A,APP,NDN,BDNF,NRP2,NRP1,DDR1,NRCAM,NTRK3,OMG,SLIT2,NLGN3,PLXNA1,PLXNA2,PLXNA4,SEMA3E,SEMA4C,DSCAM,MEGF8,PLXNC1,EPHA7,RYK,TRPV2,SLC9A6,CXCL12,SEMA6C,SEMA3F,SEMA6B,SEMA4F,SEMA4D,SEMA4B,SEMA3C,FN1,SYT3,SLIT1,SLIT3,SPP1,FSTL4,SYT1,SYT4,SEMA4A,TNR,FLRT3,FLRT1,WNT5A,IFRD1,RTN4R,RGMA,L1CAM
GO: Biological Process	GO:0055074	calcium ion homeostasis		4.665e-09	3.801e-05	2.676e-07	2.565e-06	80	426	SLC24A3,ADCYAP1R1,ADRA1D,ADRA1B,STIM2,APP,ASPH,ATP1B1,ATP2B1,ATP2B2,ATP2B3,ATP2B4,BMP4,CACNA1I,CACNA1G,NMB,CACNA1A,CACNA1C,CACNA2D1,NPY1R,NPY2R,CALCA,CALR,NTSR1,NUCB2,ATP13A5,CCKBR,OPRL1,P2RX4,PDGFRA,SLC24A2,CLN3,GSTO1,FAM20A,HERPUD1,CYBA,TRPM4,PSEN1,PSEN2,CD55,PTH1R,SV2A,ATP2C2,ATP13A3,RIC3,DRD5,BCAP31,SYPL2,NPSR1,CXCL12,STOML2,CIB2,CLSTN1,NPTN,SLC8A2,ATP2C1,SLC37A4,TMEM165,MCHR1,SPPL3,GRIK2,GRI…
GO: Biological Process	GO:0006874	cellular calcium ion homeostasis		5.002e-09	4.075e-05	2.85e-07	2.731e-06	78	412	SLC24A3,ADCYAP1R1,ADRA1D,ADRA1B,STIM2,APP,ASPH,ATP1B1,ATP2B1,ATP2B2,ATP2B3,ATP2B4,BMP4,CACNA1I,CACNA1G,NMB,CACNA1A,CACNA1C,CACNA2D1,NPY1R,NPY2R,CALCA,CALR,NTSR1,NUCB2,ATP13A5,CCKBR,OPRL1,P2RX4,PDGFRA,SLC24A2,CLN3,GSTO1,HERPUD1,CYBA,TRPM4,PSEN1,PSEN2,CD55,PTH1R,SV2A,ATP2C2,ATP13A3,RIC3,DRD5,BCAP31,SYPL2,NPSR1,CXCL12,STOML2,CIB2,CLSTN1,NPTN,SLC8A2,ATP2C1,SLC37A4,TMEM165,MCHR1,SPPL3,GRIK2,GRIN1,GRIN…
GO: Biological Process	GO:0008361	regulation of cell size		5.568e-09	4.536e-05	3.15e-07	3.019e-06	47	199	ISLR2,SEMA7A,ATP2B2,BDNF,NRP1,NPM1,NRCAM,NTRK3,OMG,SLIT2,CLCN3,CLCN6,PLXNA1,PLXNA2,PLXNA4,SEMA3E,SEMA4C,DSCAM,MEGF8,PLXNC1,EPHA7,CLN8,RYK,TRPV2,CXCL12,SEMA6C,SEMA3F,SEMA6B,SEMA4F,SEMA4D,SEMA4B,SEMA3C,FN1,SLC12A4,SLIT1,SLC12A7,SPP1,FSTL4,SEMA4A,LRRC8A,TNR,VAV1,WNT5A,IFRD1,RTN4R,RGMA,L1CAM
GO: Biological Process	GO:0046903	secretion		5.997e-09	4.885e-05	3.369e-07	3.229e-06	180	1230	SERPINA3,ACHE,MC4R,ACVR2A,ACVR2B,ADORA2B,ADRB1,SCAMP5,NLGN2,LTBP4,SYT13,PRSS12,APLP2,APP,ATP2B2,HYAL2,DGAT1,ATP6AP1,ADAM9,NCAM1,BDNF,NELL2,NEO1,CACNA1I,CACNA1H,CACNA1G,NMB,CACNA1A,CACNA1B,CACNA1C,DDR1,NPY1R,NPY2R,NPY5R,NTRK2,CANX,NTSR1,NUCB2,CREB3L1,CCK,CCKBR,OPRL1,SEC22C,CD9,P2RX4,CD34,FURIN,PAM,PCDH7,PCSK5,CBARP,CHRM1,CHRM3,CHRNB2,ABCB4,CIDEA,SELENOK,RAB9A,NRXN3,NRXN1,NRXN2,CLU,PLA2G4A,RHBDD3,T…
GO: Biological Process	GO:0006790	sulfur compound metabolic process		6.475e-09	5.275e-05	3.613e-07	3.462e-06	77	407	MGST3,TPST2,TPST1,NDST2,CHST1,DGAT1,B4GALT4,BTD,SLC5A6,CACNA1A,OMD,HACD1,PCMT1,B4GALT5,NDST3,PCYOX1L,PPT2,CHPF2,CHST2,GSTO1,EIF2AK3,DSE,MPC2,COMT,EEF1E1,TECR,PPT1,GLCE,HS2ST1,VCAN,CTNS,SPOCK2,ELOVL2,CHPF,NDNF,SLC35B3,CHSY3,DSEL,EXT1,EXT2,EXTL1,EXTL2,EXTL3,ACSL3,ACSL4,CSGALNACT2,ST3GAL6,CHST12,PXYLP1,PCYOX1,SLC19A2,ST3GAL3,CSPG5,EGFLAM,OCLN,ACSL5,GALNS,NFU1,GGT7,XYLT2,SULF2,GLB1,DGAT2,SULF1,GPAT4,…
GO: Biological Process	GO:1903573	negative regulation of response to endoplasmic reticulum stress		7.145e-09	5.821e-05	3.96e-07	3.794e-06	18	40	CREB3L1,DNAJC3,HERPUD1,DERL2,TXNDC12,UBAC2,BFAR,CREB3,HYOU1,SYVN1,SELENOS,ERLEC1,OS9,GRINA,TMBIM6,PPP1R15B,PARK7,WFS1
GO: Biological Process	GO:0030166	proteoglycan biosynthetic process		8.338e-09	6.793e-05	4.59e-07	4.398e-06	23	63	NDST2,NDST3,CHPF2,DSE,GLCE,HS2ST1,VCAN,CHPF,CHSY3,DSEL,EXT1,EXT2,EXTL1,EXTL2,EXTL3,CSGALNACT2,CHST12,PXYLP1,CSPG5,XYLT2,CHST8,CHST7,GAL3ST3
GO: Biological Process	GO:0006687	glycosphingolipid metabolic process		8.643e-09	7.042e-05	4.726e-07	4.529e-06	25	73	ARSA,ASAH1,NEU1,ST3GAL5,LARGE1,CLN3,ST8SIA5,CTSA,PSAP,CLN6,ARSK,ST3GAL6,ST3GAL3,SMPD1,GBA,GLA,GLB1,SUMF1,GM2A,HEXA,UGCG,UGT8,ITGB8,KIT,ST6GALNAC5
GO: Biological Process	GO:0045665	negative regulation of neuron differentiation		9.083e-09	7.4e-05	4.933e-07	4.728e-06	51	228	MAG,JAG1,SEMA7A,APP,NRP1,BMP7,CNTN4,CALR,OMG,SLIT2,NLGN3,SEMA3E,PSEN1,CASZ1,SEMA4C,KIAA0319,PTPRO,NTM,EFNA1,EPHA3,EPHA4,SEZ6,EPHA7,EPHB2,RYK,EFEMP1,SEMA6C,SEMA3F,SEMA6B,SEMA4F,SEMA4D,SEMA4B,SEMA3C,NLGN1,SLIT1,SPOCK1,SPP1,FSTL4,SEMA4A,THY1,LINGO1,KLK8,TNR,HLA-A,WNT5A,IFRD1,IL15RA,RTN4R,RGMA,ITM2C,LRP1
GO: Biological Process	GO:0051049	regulation of transport		9.405e-09	7.663e-05	5.075e-07	4.863e-06	265	1980	SEH1L,ABCA2,KCNH7,ACHE,ACVR2A,ADCYAP1R1,AMIGO1,ADORA2B,MET,ADRB1,SCAMP5,NLGN2,SYT13,STIM2,DPP10,HCN3,ASPH,ATP1A1,ATP1B1,ATP2B2,ATP2B4,HYAL2,DGAT1,MBTPS1,ATP6AP1,ADAM9,FXYD5,NCAM1,NRP1,BMP4,BMP7,NELL2,NEO1,NFKBIA,TSPO,CACNA1I,CACNA1H,CACNA1G,NMB,CACNA1A,CACNA1B,CACNA1C,CACNA2D1,NPY1R,NPY2R,NPY5R,CALCA,CALR,HCN1,NTRK2,NTSR1,NUCB2,CCK,CCKBR,OPRL1,P2RX4,CD34,SYNGR3,CD47,PAM,CDH2,CDH13,PDGFRB,CBARP,KC…
GO: Biological Process	GO:0035637	multicellular organismal signaling		1.18e-08	9.61e-05	6.322e-07	6.059e-06	46	197	CNTNAP1,ASPH,ATP1A1,ATP1A3,ATP1B1,ATP2B1,ATP2B2,ATP2B3,ATP2B4,FXYD6,CACNA1I,CACNA1G,CACNA1A,CACNA1C,CACNA2D1,NPPC,NPR2,NRCAM,P2RX4,CNTNAP2,CXADR,TRPM4,DPP6,DRD5,CACNG8,SCN1A,SCN1B,SCN2A,SCN7A,SCN8A,SLC8A2,SLC9A1,CACNA2D3,SCN3B,NFASC,GRIA1,GRIK2,GRM7,TNR,TRPC1,KCNA1,KCNA2,KCNC4,KCNH2,KCNJ4,KCNJ11
GO: Biological Process	GO:0046942	carboxylic acid transport		1.196e-08	9.741e-05	6.367e-07	6.101e-06	66	333	SERINC1,ABCC1,PEX3,SLC7A14,SLC17A8,BDNF,BSG,SLC5A6,NMB,CACNA1A,NPY5R,NTRK2,NTSR1,CCK,P2RX4,SLC16A3,ABCB4,CLN3,PLA2G4A,MPC2,SLC13A5,CTNS,PSEN1,SLC26A8,SLC38A10,SLC23A2,SLC6A15,SLC17A5,CLN8,ACSL3,ACSL4,EMB,ARL6IP5,SLC19A2,SLC1A1,SLC1A4,SLC1A6,SLC3A2,PDPN,SLC6A7,SLC7A1,SLC7A4,SLC15A4,SLC19A1,SLC22A5,GABBR1,ACSL5,ARL6IP1,SYT1,SERINC3,SLC16A11,SLC27A4,GRIK1,GRIN2B,GRM2,GRM7,SLC7A8,MFSD2A,SLC7A3,SLCO2B…
GO: Biological Process	GO:0010771	negative regulation of cell morphogenesis involved in differentiation		1.43e-08	0.0001165	7.568e-07	7.252e-06	35	130	MAG,SEMA7A,VASN,NRP1,OMG,SLIT2,NLGN3,SEMA3E,PSEN1,SEMA4C,PTPRO,EFNA1,EPHA7,EPHB2,RYK,SEMA6C,SEMA3F,SEMA6B,SEMA4F,SEMA4D,SEMA4B,SEMA3C,SFRP2,NLGN1,SLIT1,SPP1,FSTL4,SEMA4A,THY1,LINGO1,TNR,WNT5A,IFRD1,RTN4R,RGMA
GO: Biological Process	GO:0036508	protein alpha-1,2-demannosylation		1.524e-08	0.0001241	7.957e-07	7.625e-06	10	13	EDEM1,DERL2,SEL1L,EDEM3,EDEM2,UGGT2,SYVN1,OS9,MAN1B1,UGGT1
GO: Biological Process	GO:0036507	protein demannosylation		1.524e-08	0.0001241	7.957e-07	7.625e-06	10	13	EDEM1,DERL2,SEL1L,EDEM3,EDEM2,UGGT2,SYVN1,OS9,MAN1B1,UGGT1
GO: Biological Process	GO:0007215	glutamate receptor signaling pathway		1.617e-08	0.0001317	8.39e-07	8.04e-06	25	75	NLGN2,APP,ATP1A3,NLGN3,NRXN1,CLN3,CRHBP,RELN,RASGRF1,CACNG8,NLGN1,GRIA1,GRIA3,GRIA4,GRID1,GRIK1,GRIK2,GRIK4,GRIK5,GRIN1,GRIN2B,GRM2,GRM5,GRM7,GRM8
GO: Biological Process	GO:0007220	Notch receptor processing		1.859e-08	0.0001514	9.583e-07	9.183e-06	11	16	ADAM10,JAG1,APH1B,PSEN1,PSEN2,APH1A,GALNT11,DNER,ADAM17,NCSTN,JAG2
GO: Biological Process	GO:0015849	organic acid transport		1.948e-08	0.0001587	9.979e-07	9.563e-06	66	337	SERINC1,ABCC1,PEX3,SLC7A14,SLC17A8,BDNF,BSG,SLC5A6,NMB,CACNA1A,NPY5R,NTRK2,NTSR1,CCK,P2RX4,SLC16A3,ABCB4,CLN3,PLA2G4A,MPC2,SLC13A5,CTNS,PSEN1,SLC26A8,SLC38A10,SLC23A2,SLC6A15,SLC17A5,CLN8,ACSL3,ACSL4,EMB,ARL6IP5,SLC19A2,SLC1A1,SLC1A4,SLC1A6,SLC3A2,PDPN,SLC6A7,SLC7A1,SLC7A4,SLC15A4,SLC19A1,SLC22A5,GABBR1,ACSL5,ARL6IP1,SYT1,SERINC3,SLC16A11,SLC27A4,GRIK1,GRIN2B,GRM2,GRM7,SLC7A8,MFSD2A,SLC7A3,SLCO2B…
GO: Biological Process	GO:0030198	extracellular matrix organization		2.655e-08	0.0002163	1.352e-06	1.296e-05	68	354	ADAM10,MMP2,MMP14,MMP15,MMP16,APLP2,APP,ADAM15,BSG,DDR1,CREB3L1,P4HA1,FURIN,CD44,CD47,PDGFRA,COL1A1,COL3A1,COL8A1,COL11A2,COL12A1,COL16A1,COL19A1,OLFML2B,VCAN,CTGF,CTSK,CTSL,CTSS,DAG1,SPOCK2,ST7L,NPNT,NDNF,ELN,ADAMTS20,FBLN5,MIA3,SFRP2,FN1,PRDX4,POMT1,SPINT2,EGFLAM,SPP1,GAS6,SMOC2,SULF2,SULF1,GPM6B,EMILIN1,COL18A1,TIMP2,ICAM5,TNR,AGRN,B4GALT7,PARK7,FLRT2,ERO1B,VWA1,ITGA6,ITGA3,ITGA7,ITGAV,ITGB8,M…
GO: Biological Process	GO:0030534	adult behavior		2.745e-08	0.0002236	1.389e-06	1.331e-05	41	170	SLITRK1,MET,ADRA1B,NLGN2,APP,ADAM22,ATP1A3,SDK1,NPY,CACNA1A,CACNA1C,NTSR1,CHRNA5,CHRNB2,NLGN3,NRXN3,CLCN3,NRXN1,NRXN2,CRHBP,PPT1,CNTNAP2,SLITRK5,CTNS,ABHD12,SEZ6L2,EPHA4,SEZ6,CLN8,SCN1A,SCN8A,CXCL12,GABRG2,GLRB,GRIK1,GRIN1,GRM7,SEZ6L,HEXA,PARK7,UCHL3
GO: Biological Process	GO:0006813	potassium ion transport		2.775e-08	0.0002261	1.396e-06	1.337e-05	49	222	KCNH7,SLC24A3,AMIGO1,SLC12A5,KCNT1,DPP10,HCN3,ATP1A1,ATP1A3,ATP1B1,HCN1,KCNB2,SLC24A2,TMEM38A,CNGA4,PRNP,KCNK4,KCNG2,DPP6,TMEM38B,TMEM175,KCNV1,SLC12A4,SLC12A7,KCNH5,ABCC8,SLC9A8,KCNH3,AGRN,KCNQ5,VIP,HTR3A,KCNK12,KCNT2,KCNA1,KCNA2,KCNC1,SLC12A9,KCNC3,KCNC4,KCNF1,KCNH2,KCNJ4,KCNJ9,KCNJ11,KCNN1,KCNN2,KCNS1,KCNS3
GO: Biological Process	GO:0043062	extracellular structure organization		2.981e-08	0.0002428	1.49e-06	1.428e-05	68	355	ADAM10,MMP2,MMP14,MMP15,MMP16,APLP2,APP,ADAM15,BSG,DDR1,CREB3L1,P4HA1,FURIN,CD44,CD47,PDGFRA,COL1A1,COL3A1,COL8A1,COL11A2,COL12A1,COL16A1,COL19A1,OLFML2B,VCAN,CTGF,CTSK,CTSL,CTSS,DAG1,SPOCK2,ST7L,NPNT,NDNF,ELN,ADAMTS20,FBLN5,MIA3,SFRP2,FN1,PRDX4,POMT1,SPINT2,EGFLAM,SPP1,GAS6,SMOC2,SULF2,SULF1,GPM6B,EMILIN1,COL18A1,TIMP2,ICAM5,TNR,AGRN,B4GALT7,PARK7,FLRT2,ERO1B,VWA1,ITGA6,ITGA3,ITGA7,ITGAV,ITGB8,M…
GO: Biological Process	GO:0006457	protein folding		3.034e-08	0.0002472	1.507e-06	1.444e-05	51	236	LTBP4,PPIL3,NFYC,CALR,CANX,P4HB,CLGN,DNAJC10,CLU,PDCL3,SELENOF,TMX3,ALG12,PPIB,PDIA4,MLEC,QSOX1,QSOX2,RIC3,TXNDC11,PPIH,CRTAP,PRDX4,FKBPL,FKBP7,DNAJB11,EMC3,EMC1,ERP44,MESDC2,GANAB,ERP29,DNAJC1,FUT10,TOR2A,PDIA3,SIL1,TMX4,HSP90B1,CALR3,FKBP9,HSPA5,ERO1B,WFS1,UGGT1,TMX1,LMAN2L,TXNDC5,MOGS,LMAN1,LRPAP1
GO: Biological Process	GO:0044711	single-organism biosynthetic process		3.409e-08	0.0002777	1.683e-06	1.613e-05	239	1775	ACHE,MAS1,ABHD6,MC4R,ADCY2,ADCY8,ADCYAP1R1,ADORA2B,MGAT2,ADRB1,MGST3,SERINC1,PPM1L,FAM213B,NDST2,MRPL13,DGKE,CHST1,DEGS1,MRPL22,ATP1A1,ATP2B4,DGAT1,B4GALT4,B3GALNT1,B3GALT2,ATP6V0A1,GPAA1,CDS2,LPCAT4,NDUFAB1,BMP4,BPGM,ST3GAL5,NFE2L1,SGPL1,TSPO,CACNA1H,MALSU1,NPPC,NPR2,NPY2R,CALCA,NTSR1,NUCB2,OMD,OPRL1,CERS5,HACD1,LARGE1,PDGFRB,WNT4,B4GALT5,NDST3,VKORC1,PIGC,PIGH,PI4KA,PDCL3,ALG5,PLA2G4A,CYP7B1,AL…
GO: Biological Process	GO:0097502	mannosylation		3.737e-08	0.0003044	1.823e-06	1.747e-05	16	35	DPY19L3,LARGE1,ALG5,ALG8,ALG12,POMT2,FKRP,ALG9,TMEM5,SDF2,POMT1,ALG1,B4GAT1,DPY19L1,POMGNT2,ALG2
GO: Biological Process	GO:0016339	calcium-dependent cell-cell adhesion via plasma membrane cell adhesion molecules		3.737e-08	0.0003044	1.823e-06	1.747e-05	16	35	PCDHB16,FXYD5,CDH2,PCDH1,CDH13,NRXN1,PCDHB5,NLGN1,ATP2C1,PCDHB14,PCDHB13,PCDHB11,PCDHB10,PCDHB9,PCDHB4,PCDHB3
GO: Biological Process	GO:0032940	secretion by cell		4.402e-08	0.0003586	2.134e-06	2.045e-05	160	1093	SERPINA3,ACHE,MC4R,ACVR2A,ACVR2B,ADORA2B,ADRB1,SCAMP5,NLGN2,LTBP4,SYT13,PRSS12,APLP2,APP,HYAL2,DGAT1,ATP6AP1,ADAM9,NCAM1,BDNF,NELL2,NEO1,CACNA1I,CACNA1H,CACNA1G,NMB,CACNA1A,CACNA1B,CACNA1C,NPY1R,NPY2R,NPY5R,NTRK2,CANX,NTSR1,NUCB2,CREB3L1,CCK,CCKBR,SEC22C,CD9,CD34,FURIN,PAM,PCDH7,PCSK5,CBARP,CHRNB2,CIDEA,SELENOK,RAB9A,NRXN3,NRXN1,NRXN2,CLU,RHBDD3,TMX3,EIF2AK3,MPC2,GNPTAB,CRHBP,PDIA4,CBLN4,PPT1,CTG…
GO: Biological Process	GO:0050920	regulation of chemotaxis		4.736e-08	0.0003858	2.283e-06	2.188e-05	45	199	ADAM10,MET,SEMA7A,NRP1,CALR,NTRK3,CDH13,PDGFRA,PDGFRB,SLIT2,PLXNA1,PLXNA2,CXCL14,PLXNA4,SEMA3E,SEMA4C,PTPRJ,PTPRO,DSCAM,MEGF8,PLXNC1,ROBO1,ROBO2,RYK,FGFR1,CX3CL1,CXCL12,CREB3,SEMA6C,SEMA3F,SEMA6B,SEMA4F,SEMA4D,SEMA4B,SEMA3C,FN1,SLIT1,GAS6,ADAM17,SEMA4A,AGRN,VEGFC,WNT5A,CXCR4,SCG2
GO: Biological Process	GO:0046467	membrane lipid biosynthetic process		5.009e-08	0.0004081	2.401e-06	2.301e-05	34	130	PPM1L,DEGS1,GPAA1,ST3GAL5,SGPL1,CERS5,HACD1,LARGE1,PIGC,PIGH,ALG5,ST8SIA5,PIGG,PIGX,PIGK,PIGU,CLN8,ACER3,ST3GAL6,PGAP1,SPTLC1,ST3GAL3,PIGT,SMPD1,KDSR,GBA,PIGO,TNFRSF1A,PGAP3,UGCG,UGT8,GAL3ST3,ORMDL3,ST6GALNAC5
GO: Biological Process	GO:0045454	cell redox homeostasis		6.019e-08	0.0004904	2.868e-06	2.748e-05	23	69	TXNDC16,P4HB,DNAJC10,TMX3,PDIA4,CYBA,QSOX1,QSOX2,TXNDC12,TXNDC11,TMX2,TXNDC15,MAGT1,PRDX4,SELENOS,ERP44,DNAJC16,PDIA3,TMX4,ERO1B,TMX1,TXNDC5,TUSC3
GO: Biological Process	GO:0060284	regulation of cell development		6.209e-08	0.0005059	2.941e-06	2.818e-05	147	989	MAG,MAN2A1,ACHE,AMIGO1,MET,ADRB1,KIDINS220,JAG1,NLGN2,ISLR2,SEMA7A,VASN,LRRC4C,APP,CAPRIN2,BRINP2,ATP6AP1,ADGRB3,BDNF,NRP1,BMP4,BMP7,NEU1,TSPO,VWC2L,SDK1,CACNA1A,CNTN4,NPPC,NPR2,NRCAM,CALR,NTRK2,NTRK3,OMG,CDH2,NOG,CHRNB2,SLIT2,NLGN3,BAMBI,PLXNA1,PLXNA2,CNTN1,COL1A1,COL3A1,TMEM106B,TENM4,PLXNA4,SEMA3E,RELN,KLK6,PSEN1,DAG1,BRINP1,CASZ1,PTK7,SEMA4C,KIAA0319,PTPRA,PTPRD,PTPRO,NTM,NDNF,DSCAM,EFNA1,MEG…
GO: Biological Process	GO:0006816	calcium ion transport		6.345e-08	0.000517	2.988e-06	2.864e-05	74	406	SLC24A3,ADCYAP1R1,ADRB1,STIM2,ASPH,ATP1B1,ATP2B1,ATP2B2,ATP2B3,ATP2B4,BMP4,TSPO,CACNA1I,CACNA1H,CACNA1G,NPY,CACNA1A,CACNA1B,CACNA1C,CACNA2D1,CALCA,NTSR1,OPRL1,P2RX4,PDGFRB,CBARP,CHRNB2,SELENOK,NALCN,SLC24A2,GSTO1,CTGF,CYBA,TRPM4,PSEN1,PSEN2,PTGS2,ATP2C2,CACNG8,RAMP1,NPSR1,TRPV2,CXCL12,STOML2,CREB3,ORAI2,SLC3A2,SLC8A2,SLC9A1,ATP2C1,TSPAN13,SARAF,CACNA2D3,TMEM165,GAS6,GJA4,GPM6A,MCHR1,GRIN1,GRIN2B,…
GO: Biological Process	GO:0006821	chloride transport		6.654e-08	0.0005421	3.116e-06	2.986e-05	29	102	SLC12A5,TSPO,CLCN2,CLCN3,CLCN4,CLCN6,CLCN7,SLC26A8,ANO10,PCYOX1,SLC1A4,SLC12A4,SLC12A7,ANO3,GABRA1,GABRA2,GABRA3,GABRA5,GABRB1,GABRB3,GABRD,GABRG2,CLCC1,GLRA2,GLRB,SLC26A10,SLC12A9,SLC17A7,SLC4A10
GO: Biological Process	GO:0000902	cell morphogenesis		7.005e-08	0.0005707	3.261e-06	3.125e-05	188	1341	MAG,TMEM17,ACHE,MATN2,TENM2,DSCAML1,SLITRK1,AMIGO1,UNC5A,MET,LRFN2,KIDINS220,PDZD8,RSPH9,ISLR2,LRFN1,SEMA7A,VASN,IFT81,CNTNAP1,LRRC4C,APP,C1GALT1C1,UNC5C,CAPRIN2,ATP2B2,ADAM15,ADGRB1,ADGRB3,NCAM1,NDN,BDNF,NRP2,NRP1,BMP4,BMP7,NEO1,NFIB,CACNA1A,CNTN4,DDR1,NPTX1,NRCAM,CALR,NTRK2,NTRK3,OMD,OMG,CCK,CDH2,CDH11,NOG,WNT4,CHRNB2,SLIT2,NLGN3,LRFN4,NRXN3,NRXN1,CLU,BAMBI,PLXNA1,PLXNA2,COL1A1,SLC39A3,TSKU,TME…
GO: Biological Process	GO:0001558	regulation of cell growth		7.348e-08	0.0005987	3.402e-06	3.26e-05	79	445	ACVR1B,ADAM10,ADRB1,MMP14,LTBP4,ISLR2,SEMA7A,CAPRIN2,DCBLD2,HYAL2,ADAM15,BDNF,NRP1,DDR1,NRCAM,NTRK3,WFDC1,OMG,CD44,CD81,SLIT2,PLXNA1,PLXNA2,PPT1,PLXNA4,CTGF,SEMA3E,CYBA,CLSTN3,ST7L,SEMA4C,PTPRJ,DSCAM,HBEGF,DERL2,MEGF8,PLXNC1,EPHA7,EXTL3,RYK,ACSL4,TRPV2,KIAA1109,CXCL12,CREB3,SEMA6C,SEMA3F,SEMA6B,SEMA4F,SEMA4D,SEMA4B,SEMA3C,FBLN5,SFRP2,FN1,SYT3,CLSTN1,SLC9A1,CGRRF1,SLIT1,SLIT3,SPOCK1,SPP1,FSTL4,SYT…
GO: Biological Process	GO:0006672	ceramide metabolic process		8.083e-08	0.0006585	3.72e-06	3.565e-05	26	86	DEGS1,ASAH1,NEU1,ST3GAL5,SGPL1,CERS5,CLN3,CLN6,CLN8,ACER3,ST3GAL6,SPTLC1,ST3GAL3,SMPD1,GBA,GLA,GM2A,TNFRSF1A,HEXA,PLA2G15,UGCG,UGT8,ASAH2,ITGB8,ORMDL3,ST6GALNAC5
GO: Biological Process	GO:0007413	axonal fasciculation		8.28e-08	0.0006746	3.79e-06	3.632e-05	12	21	AMIGO1,NDN,NRP1,CNTN4,NRCAM,CRTAC1,MEGF8,EPHA3,EPHA4,EPHB2,EPHB3,WNT5A
GO: Biological Process	GO:0051240	positive regulation of multicellular organismal process		8.353e-08	0.0006805	3.802e-06	3.643e-05	219	1616	MAG,MAN2A1,ACHE,MC4R,ACVR1,ACVR1B,ACVR2A,ACVR2B,SLITRK1,AMIGO1,ADORA2B,MET,ADRA1D,ADRA1B,ADRB1,KIDINS220,SCAMP5,JAG1,NLGN2,MMP14,ISLR2,SEMA7A,IFITM1,CAPRIN2,BRINP2,ATP1A1,HYAL2,ATP6AP1,ADAM9,ADGRB1,ADGRB2,ADGRB3,NCAM1,BDNF,NRP2,NRP1,NELL1,BMP4,BMP7,NEU1,TSPO,VWC2L,NPPC,NPY1R,NPY2R,CALCA,NRCAM,NTRK2,NTRK3,NUCB2,OPRL1,CD34,ADGRE5,NOG,PDGFRB,PDLIM7,WNT4,CD83,CHRM3,SLIT2,NLGN3,SELENOK,VKORC1,NRXN3,NR…
GO: Biological Process	GO:0035235	ionotropic glutamate receptor signaling pathway		1.06e-07	0.0008638	4.799e-06	4.599e-05	13	25	APP,ATP1A3,CLN3,GRIA1,GRIA3,GRIA4,GRID1,GRIK1,GRIK2,GRIK4,GRIK5,GRIN1,GRIN2B
GO: Biological Process	GO:0030201	heparan sulfate proteoglycan metabolic process		1.1e-07	0.0008961	4.951e-06	4.744e-05	15	33	NDST2,NDST3,DSE,GLCE,HS2ST1,EXT1,EXT2,EXTL1,EXTL2,EXTL3,PXYLP1,XYLT2,SULF2,SULF1,GPC1
GO: Biological Process	GO:0042391	regulation of membrane potential		1.361e-07	0.001108	6.09e-06	5.836e-05	71	391	KCNH7,MET,ADRB1,NLGN2,HCN3,CNTNAP1,ATP1A1,ATP1A3,ATP1B1,BDNF,TSPO,CACNA1I,CACNA1H,CACNA1G,CACNA1A,CACNA1B,CACNA1C,CACNA2D1,NPY2R,NRCAM,HCN1,NTSR1,CCK,P2RX4,CHRNB2,NLGN3,NRXN1,NALCN,CLN3,CNGA4,CXADR,TRPM4,RELN,PSEN1,KCNK4,SLC26A8,DPP6,SEZ6,SCN1A,SCN1B,SCN2A,SCN7A,SCN8A,CX3CL1,STOML2,ARL6IP5,NLGN1,SLC1A6,SLC9A1,SCN3B,KCNH5,GABRB3,GLRB,POPDC3,GRIA1,GRIK1,GRIK2,GRIK5,GRIN1,GRIN2B,KCNH3,AGRN,PARK7,KCN…
GO: Biological Process	GO:0098609	cell-cell adhesion		1.394e-07	0.001135	6.204e-06	5.945e-05	145	985	TENM2,DSCAML1,AMIGO1,PCDH19,NLGN2,PCDH10,CD200,PCDHB16,ASTN1,CADM3,ADAM9,FXYD5,NCAM1,NCAM2,BLM,BMP4,BMP7,SDK1,CNTN4,CALCA,NRCAM,CD34,CD44,CD47,CDH2,PCDH1,PCDH7,PCDH8,CDH6,PCDH9,CDH8,CDH9,CDH10,CDH11,CDH12,CDH13,CDH18,PDGFRA,WNT4,CD83,SLIT2,NLGN3,SELENOK,NRXN3,NRXN1,NRXN2,CLPTM1,SDK2,COL19A1,PODXL2,NECTIN3,CCM2L,PRNP,CXADR,BOC,CLSTN3,PSEN1,PSEN2,PCDHB5,PSMB10,CD55,PTPRD,PTPRM,PTPRR,NECTIN1,NECTIN2…
GO: Biological Process	GO:0007626	locomotory behavior		1.573e-07	0.001282	6.966e-06	6.675e-05	49	234	ADRA1B,NLGN2,APLP2,APP,ADAM22,ASTN1,ATP1A3,ATP2B2,NAGLU,CACNA1A,CACNA1B,CACNA1C,NPY1R,NPY2R,NTSR1,OPRL1,ZDHHC8,CHRNB2,CLCN3,PPT1,CTNS,ABHD12,RELN,CLN6,DSCAM,SEZ6L2,EPHA4,SEZ6,CLN8,SCN1A,SCN8A,CXCL12,SELENOP,SLC22A5,GAA,GLRB,ADGRL3,GPR37,GRIN1,GRM5,ANKH,OLFM2,TNR,SEZ6L,HEXA,PARK7,UCHL3,LRRTM1,SLC4A10
GO: Biological Process	GO:0060078	regulation of postsynaptic membrane potential		1.59e-07	0.001295	7.002e-06	6.71e-05	28	100	MET,ADRB1,NLGN2,HCN3,BDNF,NPY2R,HCN1,NTSR1,P2RX4,NLGN3,NRXN1,RELN,SEZ6,SCN1A,SCN1B,SCN2A,SCN7A,SCN8A,CX3CL1,NLGN1,SCN3B,GABRB3,GRIK1,GRIK2,GRIK5,GRIN1,GRIN2B,SLC17A7
GO: Biological Process	GO:0016049	cell growth		1.632e-07	0.00133	7.15e-06	6.852e-05	93	562	ACVR1B,ADAM10,ADRA1B,ADRB1,MMP14,LTBP4,ISLR2,SEMA7A,APP,CAPRIN2,DCBLD2,HYAL2,ADAM15,NDN,BDNF,NRP2,NRP1,CACNA1A,NPM1,DDR1,ATP6V0E1,NRCAM,NTRK3,WFDC1,OMG,CD44,CD81,SLIT2,NLGN3,PLXNA1,PLXNA2,PPT1,PLXNA4,CTGF,SEMA3E,CYBA,CLSTN3,ST7L,SEMA4C,PTPRJ,NDNF,DSCAM,HBEGF,DERL2,MEGF8,PLXNC1,EPHA7,EXTL3,RYK,ACSL4,TRPV2,KIAA1109,SLC9A6,CXCL12,CREB3,SEMA6C,SEMA3F,SEMA6B,SEMA4F,SEMA4D,SEMA4B,SEMA3C,FBLN5,SFRP2,FN1…
GO: Biological Process	GO:0006491	N-glycan processing		1.661e-07	0.001353	7.173e-06	6.873e-05	12	22	MAN2A2,MAN2A1,MGAT4C,GNPTAB,EDEM1,EDEM3,EDEM2,FUT8,GNPTG,GANAB,MAN1B1,MGAT4B
GO: Biological Process	GO:0031290	retinal ganglion cell axon guidance		1.661e-07	0.001353	7.173e-06	6.873e-05	12	22	NRP1,NRCAM,SLIT2,PTPRM,PTPRO,ROBO2,EPHA7,EPHB1,EPHB2,EPHB3,SEMA4F,SLIT1
GO: Biological Process	GO:0048640	negative regulation of developmental growth		1.664e-07	0.001356	7.173e-06	6.873e-05	29	106	ADRB1,SEMA7A,NRP1,BMP4,NOG,SLIT2,CXADR,SEMA3E,LGMN,SEMA4C,EPHA7,RYK,SEMA6C,SEMA3F,SEMA6B,SEMA4F,SEMA4D,SEMA4B,SEMA3C,SFRP2,SLIT1,SPP1,FSTL4,SEMA4A,TNR,WNT5A,IFRD1,RTN4R,RGMA
GO: Biological Process	GO:0098661	inorganic anion transmembrane transport		1.708e-07	0.001392	7.324e-06	7.019e-05	30	112	SLC12A5,CLCN2,CLCN3,CLCN4,CLCN7,SLC26A8,ANO10,PCYOX1,SLC37A3,SLC1A4,SLC12A4,SLC20A1,SLC12A7,ANO3,SLC37A4,GABRA1,GABRA2,GABRA3,GABRA5,GABRB1,GABRB3,GABRD,GABRG2,CLCC1,GLRA2,GLRB,ANKH,SLC26A10,SLC12A9,SLC17A7
GO: Biological Process	GO:0050804	modulation of synaptic transmission		2.103e-07	0.001714	8.972e-06	8.598e-05	66	358	ACHE,ABHD6,MET,ADRB1,NLGN2,ATP2B2,NCAM1,BDNF,CACNA1A,CACNA1B,CNTN4,NPY2R,NPY5R,NTRK2,NTSR1,CCKBR,SYNGR1,CHRNB2,NLGN3,NRXN1,SLC24A2,CRHBP,LRRTM2,RELN,CLSTN3,PSEN1,PSEN2,SYT12,PTGS2,DRD5,RASGRF1,CACNG8,EPHB2,NLGN1,CLSTN1,NPTN,SLC8A2,CSPG5,SORCS3,GABBR1,CLSTN2,SYT11,SYP,SYT1,GPM6B,GRIA1,GRIA4,GRIK1,GRIK2,GRIK5,GRIN1,GRIN2B,GRM2,GRM5,GRM7,GRM8,ATAD1,TNR,SHISA6,VGF,HTR6,LRRTM1,KCNC3,KCNC4,KCNN2,KIT
GO: Biological Process	GO:0031214	biomineral tissue development		2.279e-07	0.001856	9.669e-06	9.266e-05	35	144	ACVR1,ACVR2A,ACVR2B,MGP,RSPO2,ATP2B2,NELL1,BMP4,BMP7,OMD,HACD1,WNT4,PLA2G4A,EIF2AK3,COL1A1,MINPP1,FAM20A,TRPM4,PTGS2,PTH1R,NECTIN1,ECM1,CNNM4,LGR4,ATRAID,MIA3,SPP1,GAS6,GLA,GPC3,GPM6B,ANKH,WNT6,FAM20C,LTBP3
GO: Biological Process	GO:0001508	action potential		2.388e-07	0.001946	1.008e-05	9.661e-05	34	138	CNTNAP1,ATP1A1,ATP1B1,CACNA1I,CACNA1H,CACNA1G,CACNA1A,CACNA1B,CACNA1C,CACNA2D1,NRCAM,HCN1,NTSR1,P2RX4,CHRNB2,NALCN,CLN3,CXADR,TRPM4,DPP6,SCN1A,SCN1B,SCN2A,SCN7A,SCN8A,SLC9A1,SCN3B,GRIA1,GRIK2,GRIN2B,KCNA1,KCNA2,KCNC4,KCNH2
GO: Biological Process	GO:2000026	regulation of multicellular organismal development		2.742e-07	0.002234	1.152e-05	0.0001104	248	1901	MAG,MAN2A1,ACHE,ACVR1,ACVR1B,ACVR2A,ACVR2B,SLITRK1,AMIGO1,ADORA2B,MET,ADRB1,KIDINS220,MGP,JAG1,NLGN2,MMP14,ISLR2,TMEM176B,SEMA7A,VASN,LRRC4C,APP,CAPRIN2,BRINP2,RSPO2,ATP6AP1,ADGRB1,ADGRB2,ADGRB3,NCAM1,BDNF,NRP1,NELL1,BMP4,BMP7,NEU1,NFIB,NFKBIA,TSPO,VWC2L,SDK1,CACNA1A,CNTN4,CALCA,NRCAM,CALR,NTRK2,NTRK3,OMD,OMG,CD34,CD44,ADGRE5,CDH2,NOG,PDGFRB,WNT4,CD83,CHRNB2,SLIT2,NLGN3,NRXN3,NRXN1,PDCL3,CLPTM1,P…
GO: Biological Process	GO:1902476	chloride transmembrane transport		2.821e-07	0.002298	1.178e-05	0.0001129	26	91	SLC12A5,CLCN2,CLCN3,CLCN4,CLCN7,SLC26A8,ANO10,PCYOX1,SLC1A4,SLC12A4,SLC12A7,ANO3,GABRA1,GABRA2,GABRA3,GABRA5,GABRB1,GABRB3,GABRD,GABRG2,CLCC1,GLRA2,GLRB,SLC26A10,SLC12A9,SLC17A7
GO: Biological Process	GO:0051966	regulation of synaptic transmission, glutamatergic		3.183e-07	0.002593	1.323e-05	0.0001268	20	59	NLGN2,NPY2R,NTRK2,CCKBR,NLGN3,NRXN1,RELN,PSEN1,PTGS2,NLGN1,SYT1,GRIA4,GRIK1,GRIK2,GRM2,GRM5,GRM7,GRM8,ATAD1,TNR
GO: Biological Process	GO:0007158	neuron cell-cell adhesion		3.244e-07	0.002643	1.335e-05	0.0001279	10	16	NLGN2,ASTN1,NCAM2,CNTN4,NLGN3,NRXN3,NRXN1,NRXN2,NLGN1,TNR
GO: Biological Process	GO:0002483	antigen processing and presentation of endogenous peptide antigen		3.244e-07	0.002643	1.335e-05	0.0001279	10	16	ABCB1,ABCB4,TAP1,TAP2,TAPBP,ABCB9,HFE,HLA-A,HLA-E,HLA-G
GO: Biological Process	GO:0021954	central nervous system neuron development		3.305e-07	0.002693	1.353e-05	0.0001297	25	86	NRP2,NRP1,NFIB,NPY,NTRK2,CDH11,CHRNB2,SLIT2,TSKU,PLXNA4,TCTN1,ROBO1,ROBO2,EPHA4,EPHB1,EPHB2,EPHB3,SCN1B,FGFR1,SLIT1,SLIT3,GABRB1,LINGO1,WNT5A,SLC4A10
GO: Biological Process	GO:0032989	cellular component morphogenesis		3.652e-07	0.002976	1.488e-05	0.0001426	195	1434	MAG,TMEM17,ACHE,MATN2,TENM2,DSCAML1,SLITRK1,AMIGO1,UNC5A,MET,LRFN2,KIDINS220,PDZD8,RSPH9,ISLR2,LRFN1,SEMA7A,VASN,IFT81,CNTNAP1,LRRC4C,APP,TCAP,C1GALT1C1,UNC5C,CAPRIN2,ATP2B2,ADAM15,ADGRB1,ADGRB3,NCAM1,NDN,BDNF,NRP2,NRP1,BMP4,BMP7,NEO1,NFIB,CACNA1A,CNTN4,DDR1,NPTX1,NRCAM,CALR,NTRK2,NTRK3,OMD,OMG,CCK,CD9,CDH2,CDH11,NOG,PDGFRA,PDGFRB,WNT4,CHRNB2,SLIT2,NLGN3,LRFN4,NRXN3,NRXN1,CLU,BAMBI,PLXNA1,PLXNA2,…
GO: Biological Process	GO:0010721	negative regulation of cell development		3.722e-07	0.003033	1.509e-05	0.0001446	65	356	MAG,JAG1,SEMA7A,VASN,APP,BDNF,NRP1,BMP4,BMP7,TSPO,CNTN4,NPPC,NPR2,CALR,NTRK3,OMG,NOG,SLIT2,NLGN3,COL3A1,SEMA3E,PSEN1,BRINP1,CASZ1,SEMA4C,KIAA0319,PTPRO,NTM,EFNA1,EPHA3,EPHA4,SEZ6,EPHA7,EPHB2,RYK,EFEMP1,SEMA6C,SEMA3F,SEMA6B,SEMA4F,SEMA4D,SEMA4B,SEMA3C,SFRP2,NLGN1,SLIT1,SORL1,SPOCK1,SPP1,FSTL4,SEMA4A,THY1,LINGO1,KLK8,TNR,HLA-A,WNT5A,WNT7B,IFRD1,IL15RA,RTN4R,RGMA,TRIM11,ITM2C,LRP1
GO: Biological Process	GO:0044272	sulfur compound biosynthetic process		3.903e-07	0.00318	1.574e-05	0.0001508	46	220	MGST3,NDST2,CHST1,B4GALT4,OMD,HACD1,B4GALT5,NDST3,PPT2,CHPF2,CHST2,GSTO1,EIF2AK3,DSE,MPC2,TECR,PPT1,GLCE,HS2ST1,VCAN,ELOVL2,CHPF,SLC35B3,CHSY3,DSEL,EXT1,EXT2,EXTL1,EXTL2,EXTL3,ACSL3,ACSL4,CSGALNACT2,ST3GAL6,CHST12,PXYLP1,ST3GAL3,CSPG5,ACSL5,GGT7,XYLT2,LIAS,B4GAT1,GSTP1,CHST7,SLC35B2
GO: Biological Process	GO:0009247	glycolipid biosynthetic process		4.084e-07	0.003327	1.639e-05	0.000157	21	65	GPAA1,ST3GAL5,LARGE1,PIGC,PIGH,ALG5,ST8SIA5,PIGG,PIGX,PIGK,PIGU,ST3GAL6,PGAP1,ST3GAL3,PIGT,PIGO,PGAP3,UGCG,UGT8,GAL3ST3,ST6GALNAC5
GO: Biological Process	GO:0019233	sensory perception of pain		4.342e-07	0.003538	1.734e-05	0.0001662	33	135	ADRB1,NLGN2,NCAM1,NDN,CACNA1H,CACNA1A,CACNA1B,NPY1R,NPY2R,CALCA,NTSR1,CCK,CCKBR,OPRL1,P2RX4,CHRNB2,COMT,CTSS,PTGS2,KCNK4,EPHB1,NR2F6,FGFR1,POMK,SLC9A1,SCN3B,GRIN1,GRIN2B,GRM8,VIP,KCNA1,KCNA2,KCNC4
GO: Biological Process	GO:0050922	negative regulation of chemotaxis		4.472e-07	0.003643	1.777e-05	0.0001703	19	55	SEMA7A,NRP1,SLIT2,SEMA3E,SEMA4C,PTPRO,ROBO1,ROBO2,RYK,SEMA6C,SEMA3F,SEMA6B,SEMA4F,SEMA4D,SEMA4B,SEMA3C,SLIT1,SEMA4A,WNT5A
GO: Biological Process	GO:1902236	negative regulation of endoplasmic reticulum stress-induced intrinsic apoptotic signaling pathway		4.948e-07	0.004031	1.957e-05	0.0001875	11	20	CREB3L1,HERPUD1,TXNDC12,CREB3,HYOU1,SYVN1,SELENOS,GRINA,TMBIM6,PARK7,WFS1
GO: Biological Process	GO:1902235	regulation of endoplasmic reticulum stress-induced intrinsic apoptotic signaling pathway		5.246e-07	0.004274	2.065e-05	0.0001979	14	32	CREB3L1,EIF2AK3,HERPUD1,TXNDC12,CREB3,HYOU1,SYVN1,SELENOS,SERINC3,ERP29,GRINA,TMBIM6,PARK7,WFS1
GO: Biological Process	GO:0016477	cell migration		5.603e-07	0.004565	2.195e-05	0.0002103	179	1302	MAG,MATN2,ABHD6,ACVR1,ACVR1B,ADAM10,MET,JAG1,MMP2,MMP14,ABCC1,SEMA7A,IFITM1,UNC5C,PODN,ASTN1,ATP1B1,HYAL2,ADAM15,ADAM9,NDN,NRP2,NRP1,BMP4,BSG,SGPL1,TSPO,BMPER,DDR1,CALCA,NRCAM,CALR,NTRK2,NTRK3,CCK,SLC16A3,CD34,FURIN,CD44,CD47,CDH2,CDH13,NOG,PDGFRA,PDGFRB,WNT4,SLIT2,SELENOK,CLN3,BAMBI,PLAT,PLAU,PLXNA1,PLXNA2,WDR44,COL1A1,COL3A1,DDIT4,MBOAT7,CXCL14,PODXL2,VCAN,PLXNA4,SDC3,CTGF,CXADR,SEMA3E,TRPM4,RE…
GO: Biological Process	GO:0002476	antigen processing and presentation of endogenous peptide antigen via MHC class Ib		5.751e-07	0.004686	2.242e-05	0.0002148	7	8	ABCB1,ABCB4,TAP1,TAP2,ABCB9,HLA-E,HLA-G
GO: Biological Process	GO:0010976	positive regulation of neuron projection development		6.024e-07	0.004907	2.337e-05	0.0002239	55	287	ACHE,AMIGO1,MET,KIDINS220,NLGN2,ISLR2,SEMA7A,CAPRIN2,BDNF,NRP1,BMP4,BMP7,NEU1,NTRK2,NTRK3,SLIT2,NLGN3,CNTN1,TMEM106B,RELN,PSEN1,PTK7,PTPRD,NDNF,DSCAM,MEGF8,ROBO1,ROBO2,EPHA3,EPHA4,SEZ6,SCN1B,TRPV2,FGFR1,CXCL12,SEMA4D,FN1,SYT3,NLGN1,NPTN,TMEM30A,ATP8A2,SYT1,SYT4,GRN,IL1RAPL1,PLXNB2,VLDLR,WNT5A,IGF1R,IL1RAP,ITGA3,MOB2,RGMA,L1CAM
GO: Biological Process	GO:1901264	carbohydrate derivative transport		6.158e-07	0.005017	2.378e-05	0.0002278	19	56	ABCC1,ABCB1,ABCG1,RFT1,SLC35B3,SLC35C2,SLC17A5,SLC35B1,SLC35E3,SLC37A3,SLC35A1,NPC2,G6PC3,SLC37A4,SLC35A3,SLC35B4,SLC35A2,VLDLR,SLC35B2
GO: Biological Process	GO:0048638	regulation of developmental growth		6.862e-07	0.00559	2.637e-05	0.0002527	63	347	ADRB1,ATRN,ISLR2,SEMA7A,APP,NCAM1,BDNF,NRP1,BMP4,SGPL1,CACNA1C,NPPC,NPY1R,NRCAM,NTRK3,OMG,NOG,SLIT2,PLXNA1,PLXNA2,POR,PPIB,PLXNA4,CXADR,SEMA3E,LGMN,SEMA4C,DSCAM,MEGF8,PLXNC1,EPHA7,RYK,TRPV2,FGFR1,CXCL12,SEMA6C,SEMA3F,SEMA6B,SEMA4F,SEMA4D,SEMA4B,SEMA3C,SFRP2,FN1,SYT3,SLIT1,SPP1,ATP8A2,FSTL4,AFG3L2,SYT1,SYT4,SEMA4A,GPAT4,TNR,AGRN,WNT2,WNT5A,IFRD1,RTN4R,INSR,RGMA,L1CAM
GO: Biological Process	GO:0035725	sodium ion transmembrane transport		7.875e-07	0.006415	3.012e-05	0.0002886	32	132	SLC24A3,HCN3,ATP1A1,ATP1A3,ATP1B1,ATP2B4,FXYD5,HCN1,NALCN,SLC24A2,STOML1,SLC4A7,TRPM4,CNNM4,SCN1A,SCN1B,SCN2A,SCN7A,SCN8A,SLC9A6,SLC3A2,SLC8A2,SLC9A1,SLC9A2,SLC9A5,SLC20A1,SCN3B,SLC9A9,SLC9A8,AGRN,TRPM2,SLC17A7
GO: Biological Process	GO:0042982	amyloid precursor protein metabolic process		8.301e-07	0.006763	3.16e-05	0.0003028	14	33	ACHE,CLU,CLN3,ITM2A,ABCG1,KLK6,PSEN1,PSEN2,DHCR24,APH1A,SORL1,NCSTN,LRRTM3,ITM2C
GO: Biological Process	GO:0034975	protein folding in endoplasmic reticulum		9.534e-07	0.007767	3.613e-05	0.0003462	8	11	CALR,CANX,DNAJC10,EMC3,EMC1,PDIA3,HSP90B1,HSPA5
GO: Biological Process	GO:0043270	positive regulation of ion transport		9.799e-07	0.007983	3.696e-05	0.0003542	54	284	ADCYAP1R1,AMIGO1,ADRB1,STIM2,ASPH,ATP1B1,ATP2B2,BMP4,TSPO,CACNA2D1,NPY2R,HCN1,NTSR1,CCK,P2RX4,PDGFRB,CHRM1,CHRNB2,ABCB4,NLGN3,GSTO1,CNTN1,CTSS,RELN,ATP2C2,DPP6,NPSR1,ATP8A1,SCN1B,TRPV2,CXCL12,CREB3,SLC9A1,GABBR1,ACSL5,SCN3B,ATP8A2,ARL6IP1,ABCC8,MCHR1,GRIK1,GRIN2B,THY1,HFE,PARK7,TRPC1,HTR3A,HTR6,WFS1,KCNC1,CXCR4,KCNH2,KCNJ11,CEMIP
GO: Biological Process	GO:0006465	signal peptide processing		1.012e-06	0.008249	3.801e-05	0.0003643	12	25	SPCS1,SEC11C,FURIN,PCSK5,CLN5,SPCS2,GAS6,SPPL3,SEC11A,SPCS3,HM13,SPPL2B
GO: Biological Process	GO:1903513	endoplasmic reticulum to cytosol transport		1.137e-06	0.009264	4.25e-05	0.0004072	19	58	ASPH,AUP1,CACNA1C,GSTO1,DERL1,EDEM1,HERPUD1,DERL2,BCAP31,UBAC2,TMEM129,SEL1L,EDEM2,SYVN1,SELENOS,ERLEC1,OS9,HSP90B1,HM13
GO: Biological Process	GO:0001503	ossification		1.226e-06	0.009989	4.561e-05	0.0004371	70	406	ACHE,ACVR1,ACVR2A,ACVR2B,MGP,JAG1,MMP2,MMP14,MMP16,SEMA7A,RDH14,IFITM1,RSPO2,ATP6AP1,NELL1,BMP3,BMP4,BMP7,NPPC,NPR2,CALCA,OMD,CREB3L1,CDH11,NOG,PDLIM7,WNT4,PLA2G4A,EIF2AK3,COL1A1,COL11A2,MINPP1,VCAN,CTGF,CTSK,TRPM4,PTGS2,PTH1R,CHRDL1,NPNT,ECM1,OSTF1,ERH,LGR4,EXT1,EXT2,RRBP1,SORT1,ATRAID,FGFR1,SEMA4D,MIA3,SFRP2,GABBR1,SPP1,GLA,GPC3,BCAP29,GPM6B,SUN1,UFL1,ANKH,WNT5A,WNT7B,IGFBP5,IL6ST,FAM20C,CCDC47…
GO: Biological Process	GO:0015807	L-amino acid transport		1.241e-06	0.01011	4.584e-05	0.0004393	21	69	SERINC1,SLC7A14,SLC17A8,NTSR1,CTNS,PSEN1,CLN8,ARL6IP5,SLC1A1,SLC1A4,SLC1A6,SLC7A1,SLC7A4,SLC15A4,ARL6IP1,SERINC3,SLC7A8,SLC7A3,SLC6A17,SLC17A7,SLC7A5
GO: Biological Process	GO:0051674	localization of cell		1.253e-06	0.01021	4.584e-05	0.0004393	192	1433	MAG,MATN2,ABHD6,ACVR1,ACVR1B,ADAM10,MET,JAG1,MMP2,MMP14,RSPH9,ABCC1,SEMA7A,IFITM1,UNC5C,PODN,ASTN1,ATP1B1,ATP2B4,HYAL2,ADAM15,ADAM9,NDN,NRP2,NRP1,BMP4,BSG,SGPL1,TSPO,CACNA1I,BMPER,DDR1,CALCA,NRCAM,CALR,NTRK2,NTRK3,CCK,SLC16A3,CD34,FURIN,CD44,CD47,CD81,CDH2,CDH13,NOG,PDGFRA,PDGFRB,WNT4,SLIT2,SELENOK,CLN3,BAMBI,PLAT,PLAU,PLXNA1,PLXNA2,WDR44,COL1A1,COL3A1,DDIT4,MBOAT7,NRG2,CXCL14,PODXL2,VCAN,PLXNA4,…
GO: Biological Process	GO:0048870	cell motility		1.253e-06	0.01021	4.584e-05	0.0004393	192	1433	MAG,MATN2,ABHD6,ACVR1,ACVR1B,ADAM10,MET,JAG1,MMP2,MMP14,RSPH9,ABCC1,SEMA7A,IFITM1,UNC5C,PODN,ASTN1,ATP1B1,ATP2B4,HYAL2,ADAM15,ADAM9,NDN,NRP2,NRP1,BMP4,BSG,SGPL1,TSPO,CACNA1I,BMPER,DDR1,CALCA,NRCAM,CALR,NTRK2,NTRK3,CCK,SLC16A3,CD34,FURIN,CD44,CD47,CD81,CDH2,CDH13,NOG,PDGFRA,PDGFRB,WNT4,SLIT2,SELENOK,CLN3,BAMBI,PLAT,PLAU,PLXNA1,PLXNA2,WDR44,COL1A1,COL3A1,DDIT4,MBOAT7,NRG2,CXCL14,PODXL2,VCAN,PLXNA4,…
GO: Biological Process	GO:0015698	inorganic anion transport		1.255e-06	0.01022	4.584e-05	0.0004393	35	154	SLC12A5,TSPO,CLCN2,CLCN3,CLCN4,CLCN6,CLCN7,SLC4A7,SLC26A8,ANO10,FGFR1,PCYOX1,SLC37A3,SLC1A4,SLC12A4,SLC20A1,SLC12A7,ANO3,SLC37A4,GABRA1,GABRA2,GABRA3,GABRA5,GABRB1,GABRB3,GABRD,GABRG2,CLCC1,GLRA2,GLRB,ANKH,SLC26A10,SLC12A9,SLC17A7,SLC4A10
GO: Biological Process	GO:1905039	carboxylic acid transmembrane transport		1.338e-06	0.0109	4.865e-05	0.0004662	28	110	ABCC1,PEX3,SLC7A14,SLC17A8,SLC5A6,SLC16A3,MPC2,SLC13A5,SLC38A10,SLC23A2,SLC6A15,SLC17A5,EMB,SLC1A1,SLC1A4,SLC1A6,SLC6A7,SLC7A1,SLC7A4,SLC15A4,SLC22A5,ACSL5,SLC16A11,SLC7A8,SLC7A3,SLC6A17,SLC17A7,SLC7A5
GO: Biological Process	GO:0015748	organophosphate ester transport		1.656e-06	0.01349	5.997e-05	0.0005746	25	93	ABCA2,ABCC1,ABCB4,ABCG1,SLC35B3,SLC35C2,ATP9A,SLC35B1,ATP9B,ATP8A1,SLC35E3,SLC37A3,SLC35A1,NPC2,G6PC3,TMEM30A,SLC37A4,ATP8A2,ATP11B,MFSD2A,SLC35A3,SLC35B4,SLC35A2,SLC35B2,LDLR
GO: Biological Process	GO:0035268	protein mannosylation		1.73e-06	0.01409	6.236e-05	0.0005976	11	22	DPY19L3,LARGE1,ALG5,POMT2,FKRP,TMEM5,SDF2,POMT1,B4GAT1,DPY19L1,POMGNT2
GO: Biological Process	GO:0060322	head development		1.756e-06	0.0143	6.301e-05	0.0006038	119	807	MAG,MAS1,DSCAML1,MET,PCDH19,MMP2,ATRN,SEMA7A,APLP2,APP,UNC5C,ASPH,SLC17A8,ATP2B1,ATP2B2,ATP2B4,NAGLU,NCAM1,NDUFS4,NRP2,NRP1,BMP4,NFIB,SGPL1,NPY,CACNA1A,CNTN4,NTRK2,CD9,SYNGR3,CDH2,PCDH9,NOG,PDGFRA,WNT4,CHRNB2,SLIT2,NRXN1,CLN5,PLXNA2,CNTN1,COL1A1,COL3A1,DDIT4,SLC4A7,MBOAT7,TSKU,PPT1,CNTNAP2,PLXNA4,SLITRK5,CTNS,RELN,PSEN1,PSEN2,SEMA4C,PTPRS,TCTN1,E2F1,CRTAC1,SEZ6L2,EFNA2,CELSR2,ATP6AP2,TMEM57,SYPL2…
GO: Biological Process	GO:0040012	regulation of locomotion		1.863e-06	0.01518	6.657e-05	0.0006379	126	867	ABHD6,ACVR1,ACVR1B,ADAM10,MET,JAG1,MMP2,MMP14,ABCC1,SEMA7A,IFITM1,UNC5C,PODN,HYAL2,ADAM15,ADAM9,NRP2,NRP1,BMP4,BMPER,CALR,NTRK3,P4HB,FURIN,CD81,CDH13,NOG,PDGFRA,PDGFRB,WNT4,CHRM1,CHRM4,SLIT2,SELENOK,PLAU,PLXNA1,PLXNA2,WDR44,COL1A1,COL3A1,NRG2,CXCL14,PLXNA4,SDC3,SEMA3E,RELN,DAG1,PTGS2,SEMA4C,PTPRJ,PTPRK,PTPRM,PTPRO,PTPRR,NECTIN2,DRD5,DSCAM,HBEGF,PTPRU,ECM1,MEMO1,EFNA1,MEGF8,PLXNC1,ROBO1,ROBO2,LGR6…
GO: Biological Process	GO:0006814	sodium ion transport		1.892e-06	0.01541	6.73e-05	0.0006449	44	218	SLC24A3,HCN3,SLC17A8,ATP1A1,ATP1A3,ATP1B1,ATP2B4,FXYD5,SLC5A6,HCN1,P2RX4,NALCN,SLC24A2,STOML1,CNTN1,SLC4A7,SLC13A5,TRPM4,SLC38A10,SLC23A2,SLC6A15,CNNM4,SLC10A7,SCN1A,SCN1B,SCN2A,SCN7A,SCN8A,SLC9A6,SLC3A2,SLC8A2,SLC9A1,SLC9A2,SLC9A5,SLC20A1,SLC22A5,SCN3B,SLC9A9,SLC9A8,COMMD3,AGRN,TRPM2,SLC17A7,SLC4A10
GO: Biological Process	GO:0048167	regulation of synaptic plasticity		1.916e-06	0.01561	6.787e-05	0.0006504	37	170	ABHD6,ADRB1,ATP2B2,NCAM1,BDNF,CNTN4,NTRK2,SYNGR1,NLGN3,SLC24A2,LRRTM2,RELN,PSEN1,PSEN2,SYT12,PTGS2,DRD5,RASGRF1,EPHB2,NLGN1,NPTN,SLC8A2,SORCS3,SYP,GRIA1,GRIK1,GRIK2,GRIN1,GRIN2B,GRM5,TNR,SHISA6,VGF,HTR6,LRRTM1,KCNN2,KIT
GO: Biological Process	GO:0050769	positive regulation of neurogenesis		2.163e-06	0.01762	7.628e-05	0.000731	77	467	MAG,MAN2A1,ACHE,AMIGO1,MET,KIDINS220,NLGN2,ISLR2,SEMA7A,CAPRIN2,BRINP2,BDNF,NRP1,BMP4,BMP7,NEU1,TSPO,VWC2L,NRCAM,NTRK2,NTRK3,NOG,SLIT2,NLGN3,CNTN1,TMEM106B,TENM4,RELN,PSEN1,BRINP1,PTK7,PTPRA,PTPRD,NDNF,DSCAM,MEGF8,ROBO1,ROBO2,EPHA3,EPHA4,SEZ6,EPHB2,SCN1B,TRPV2,FGFR1,CX3CL1,CXCL12,SEMA4D,FN1,SYT3,NLGN1,NPTN,TMEM30A,ATP8A2,SYT1,SYT4,UFL1,GRN,GRM5,TF,IL1RAPL1,TIMP2,PLXNB2,VEGFC,VLDLR,WNT2,WNT5A,IGF1…
GO: Biological Process	GO:0007157	heterophilic cell-cell adhesion via plasma membrane cell adhesion molecules		2.202e-06	0.01794	7.734e-05	0.0007411	18	55	TENM2,AMIGO1,CD200,CADM3,CDH2,NRXN1,NECTIN3,CXADR,PTPRD,NECTIN1,NECTIN2,ADGRL1,NLGN1,IL1RAPL1,CADM4,CADM2,AMIGO2,L1CAM
GO: Biological Process	GO:0050654	chondroitin sulfate proteoglycan metabolic process		2.328e-06	0.01897	8.14e-05	0.0007801	16	45	CHPF2,DSE,VCAN,SPOCK2,CHPF,NDNF,CHSY3,DSEL,CSGALNACT2,CHST12,PXYLP1,CSPG5,EGFLAM,XYLT2,HEXA,CHST7
GO: Biological Process	GO:0002428	antigen processing and presentation of peptide antigen via MHC class Ib		2.367e-06	0.01928	8.239e-05	0.0007895	7	9	ABCB1,ABCB4,TAP1,TAP2,ABCB9,HLA-E,HLA-G
GO: Biological Process	GO:1903825	organic acid transmembrane transport		2.38e-06	0.01939	8.251e-05	0.0007906	28	113	ABCC1,PEX3,SLC7A14,SLC17A8,SLC5A6,SLC16A3,MPC2,SLC13A5,SLC38A10,SLC23A2,SLC6A15,SLC17A5,EMB,SLC1A1,SLC1A4,SLC1A6,SLC6A7,SLC7A1,SLC7A4,SLC15A4,SLC22A5,ACSL5,SLC16A11,SLC7A8,SLC7A3,SLC6A17,SLC17A7,SLC7A5
GO: Biological Process	GO:0007218	neuropeptide signaling pathway		2.462e-06	0.02006	8.5e-05	0.0008145	27	107	SORCS1,SORCS2,NMB,NPY,NPY1R,NPY2R,NPY5R,CALCA,NTSR1,OPRL1,PNOC,CPE,TENM1,NPSR1,SORT1,QRFPR,SCG5,SORCS3,SSTR2,SSTR3,GLRA2,GLRB,MCHR1,GRP,NXPH3,NXPH2,HCRTR1
GO: Biological Process	GO:0015012	heparan sulfate proteoglycan biosynthetic process		2.815e-06	0.02293	9.676e-05	0.0009272	12	27	NDST2,NDST3,DSE,GLCE,HS2ST1,EXT1,EXT2,EXTL1,EXTL2,EXTL3,PXYLP1,XYLT2
GO: Biological Process	GO:0019883	antigen processing and presentation of endogenous antigen		2.848e-06	0.0232	9.749e-05	0.0009342	10	19	ABCB1,ABCB4,TAP1,TAP2,TAPBP,ABCB9,HFE,HLA-A,HLA-E,HLA-G
GO: Biological Process	GO:0033619	membrane protein proteolysis		2.954e-06	0.02407	0.0001007	0.0009649	18	56	ADAM10,MBTPS1,ADAM9,FURIN,APH1B,PSEN1,PSEN2,DAG1,APH1A,MBTPS2,PARL,ADAM17,SPPL3,NCSTN,TIMP2,BACE1,HM13,SPPL2B
GO: Biological Process	GO:0099565	chemical synaptic transmission, postsynaptic		2.984e-06	0.02431	0.0001013	0.0009707	27	108	MET,ADRB1,NLGN2,BDNF,TSPO,NPY2R,NTSR1,P2RX4,CHRNA5,CHRNB2,NLGN3,NRXN1,RELN,SEZ6,CX3CL1,NLGN1,GABRA2,GABRA3,GABRB3,GABRG2,GLRA2,GRIK1,GRIK2,GRIK5,GRIN1,GRIN2B,SLC17A7
GO: Biological Process	GO:0007167	enzyme linked receptor protein signaling pathway		3.019e-06	0.0246	0.0001021	0.0009781	143	1021	ZFYVE27,ACVR1,ACVR1B,ACVR2A,ACVR2B,ADAM10,MET,PPM1L,NCEH1,MMP2,LTBP4,VASN,APLP2,APP,ATP6V0B,ATP6V0A1,ATP6AP1,ADAM9,NDN,BDNF,NRP2,NRP1,BMP3,BMP4,BMP7,NEO1,SGPL1,VWC2L,BMPER,DDR1,NPPC,NPR2,ATP6V0E1,NTRK2,NTRK3,MPZL1,NUCB2,CAV2,FURIN,SLC33A1,CDH13,NOG,PDGFRA,PDGFRB,WNT4,CIDEA,STOML1,BAMBI,PLAT,EIF2AK3,COL1A1,COL3A1,DDIT4,SLC2A8,POLR2F,POLR2H,POLR2J,POLR2K,NRG2,CTGF,LEPROT,CYBA,APH1B,LGMN,PSEN1,PSEN2…
GO: Biological Process	GO:0006885	regulation of pH		3.068e-06	0.025	0.0001033	0.0009898	26	102	AQP11,SLC12A5,ATP6V0B,ATP6V0A1,ATP6AP1,CA4,ATP6V0E1,CLCN3,CLN3,CLN5,SLC4A7,PPT1,SLC26A8,CLN6,SLC9A6,GPR89B,TMEM175,SLC9A1,SLC9A2,SLC9A5,SLC9A9,TMEM165,SLC9A8,SLC26A10,SLC17A7,SLC4A10
GO: Biological Process	GO:0040008	regulation of growth		3.115e-06	0.02537	0.0001044	0.001001	108	724	ACVR1B,ADAM10,ADRB1,MMP14,LTBP4,ATRN,ISLR2,SEMA7A,APP,CAPRIN2,DCBLD2,HYAL2,ADAM15,NCAM1,NDN,BDNF,NRP1,BMP4,NELL2,SGPL1,CACNA1C,DDR1,NPPC,NPY1R,NRCAM,NTRK3,WFDC1,IGSF11,OMG,CD44,CD81,NOG,SLIT2,PLXNA1,PLXNA2,LRP12,POR,PPIB,PPT1,PLXNA4,CTGF,CXADR,SEMA3E,CYBA,LGMN,CLSTN3,ST7L,SEMA4C,PTPRJ,DSCAM,HBEGF,DERL2,MEGF8,PLXNC1,EPHA7,EXTL3,RYK,ACSL4,TRPV2,KIAA1109,FGFR1,CXCL12,CREB3,SEMA6C,SEMA3F,SEMA6B,SEMA4…
GO: Biological Process	GO:1905114	cell surface receptor signaling pathway involved in cell-cell signaling		3.444e-06	0.02806	0.000115	0.001102	28	115	MET,ADRB1,NLGN2,BDNF,BMP4,TSPO,NPY2R,NTSR1,P2RX4,CHRNA5,CHRNB2,NLGN3,NRXN1,RELN,SEZ6,CX3CL1,NLGN1,GABRA2,GABRA3,GABRB3,GABRG2,GLRA2,GRIK1,GRIK2,GRIK5,GRIN1,GRIN2B,SLC17A7
GO: Biological Process	GO:0006066	alcohol metabolic process		3.821e-06	0.03113	0.0001271	0.001218	69	411	ABCA2,ACHE,MAS1,ADCYAP1R1,RDH14,APLP2,APP,DGAT1,MBTPS1,LPCAT4,CACNA1H,NTSR1,WNT4,CLN3,ALG5,PLA2G4A,CYP7B1,POR,MINPP1,ABCG1,LGMN,CYP51A1,RETSAT,PTH1R,LPCAT2,DHCR7,DHCR24,CLN6,DPAGT1,SRD5A3,RDH12,RDH11,CLN8,LPCAT1,ACER3,ACSL3,CEPT1,MBTPS2,FGFR1,SPTLC1,NPC2,SCAP,EBP,SMPD1,DKK3,CYB5R1,SORL1,SQLE,GBA,CYP46A1,MBOAT2,SMPDL3B,DGAT2,EBPL,STARD3,GPAT4,C14orf1,TM7SF2,PARK7,HMGCR,PLA2G15,VLDLR,LMF1,INSIG1,CH…
GO: Biological Process	GO:0051604	protein maturation		4.354e-06	0.03547	0.0001442	0.001382	63	366	ADAM10,MMP14,PRSS12,SPCS1,TSPAN33,TMEM208,ASPH,SEC11C,CALR,RHBDL1,CCK,FURIN,PCSK5,PCSK2,CLN3,CLN5,PLAT,EIF2AK3,FKRP,TMEM59,CPD,CPE,CR1L,CTSS,CTSZ,APH1B,LGMN,MASP1,KLK6,PSEN1,PSEN2,SPCS2,CD55,DHCR24,SUSD4,ECE1,APH1A,ATP6AP2,ROBO1,ZMPSTE24,PARL,STOML2,SCG5,PRDX4,SORL1,PLGRKT,GAS6,PERP,GLG1,AFG3L2,SPPL3,NCSTN,CHST8,SEC11A,CPXM1,SPCS3,LMF1,ERO1B,WFS1,XDH,HM13,SPPL2B,TSPAN14
GO: Biological Process	GO:0035269	protein O-linked mannosylation		4.423e-06	0.03604	0.0001459	0.001398	9	16	LARGE1,ALG5,POMT2,FKRP,TMEM5,SDF2,POMT1,B4GAT1,POMGNT2
GO: Biological Process	GO:0030204	chondroitin sulfate metabolic process		4.512e-06	0.03676	0.0001482	0.00142	15	42	CHPF2,DSE,VCAN,SPOCK2,CHPF,NDNF,CHSY3,DSEL,CSGALNACT2,CHST12,CSPG5,EGFLAM,XYLT2,HEXA,CHST7
GO: Biological Process	GO:0019226	transmission of nerve impulse		4.569e-06	0.03722	0.0001495	0.001432	22	80	CNTNAP1,CACNA1I,CACNA1A,NRCAM,P2RX4,CNTNAP2,DPP6,DRD5,CACNG8,SCN1A,SCN1B,SCN2A,SCN7A,SCN8A,NFASC,GRIA1,GRIK2,GRM7,TNR,KCNA1,KCNA2,KCNC4
GO: Biological Process	GO:0002485	antigen processing and presentation of endogenous peptide antigen via MHC class I via ER pathway, TAP-dependent		5.229e-06	0.0426	0.0001691	0.00162	6	7	ABCB1,ABCB4,TAP1,TAP2,ABCB9,HLA-A
GO: Biological Process	GO:0002489	antigen processing and presentation of endogenous peptide antigen via MHC class Ib via ER pathway, TAP-dependent		5.229e-06	0.0426	0.0001691	0.00162	6	7	ABCB1,ABCB4,TAP1,TAP2,ABCB9,HLA-E
GO: Biological Process	GO:0002488	antigen processing and presentation of endogenous peptide antigen via MHC class Ib via ER pathway		5.229e-06	0.0426	0.0001691	0.00162	6	7	ABCB1,ABCB4,TAP1,TAP2,ABCB9,HLA-E
GO: Biological Process	GO:0000041	transition metal ion transport		5.874e-06	0.04786	0.0001892	0.001813	28	118	ATP6V0B,ATP6V0A1,ATP6AP1,ATP6V0E1,SLC39A6,SLC39A3,CP,SLC30A7,ATP2C2,NECTIN1,CCS,CUTC,STEAP3,SLC39A9,SLC30A6,ATP2C1,SLC39A1,TF,SLC39A14,HFE,TRPC1,TRPC4,TRPM2,SLC30A5,SLC30A3,ATP13A1,SLC39A10,MCOLN1
GO: Biological Process	GO:1902285	semaphorin-plexin signaling pathway involved in neuron projection guidance		6.222e-06	0.05069	0.0001996	0.001912	8	13	NRP2,NRP1,PLXNA1,PLXNA2,PLXNA4,PLXNC1,SEMA3F,PLXNB2
GO: Biological Process	GO:0006984	ER-nucleus signaling pathway		6.312e-06	0.05142	0.0002017	0.001932	15	43	MBTPS1,CALR,EIF2AK3,HERPUD1,ATG10,FBXW7,MBTPS2,SCAP,SELENOS,PPP1R15B,HSP90B1,HSPA5,WFS1,INSIG1,CCDC47
GO: Biological Process	GO:0008037	cell recognition		6.595e-06	0.05373	0.0002099	0.002011	35	165	DSCAML1,AMIGO1,CD200,APP,ARSA,CADM3,NDN,BDNF,NRP1,CNTN4,NRCAM,CLGN,NECTIN3,VCAN,CNTNAP2,SIRPA,NTM,NECTIN1,NECTIN2,DSCAM,CRTAC1,MEGF8,ROBO1,ROBO2,EPHA3,EPHA4,EPHB1,EPHB2,EPHB3,FCGR1A,CADM4,COLEC12,WNT5A,CADM2,CXCR4
GO: Biological Process	GO:0008045	motor neuron axon guidance		8.216e-06	0.06693	0.0002604	0.002496	13	34	NRP1,NOG,SLIT2,PLXNA1,PLXNA2,PLXNA4,PLXNC1,EPHA3,EPHA4,CXCL12,SEMA3F,SLIT1,CXCR4
GO: Biological Process	GO:0031293	membrane protein intracellular domain proteolysis		8.591e-06	0.06999	0.0002713	0.002599	9	17	MBTPS1,APH1B,PSEN2,APH1A,MBTPS2,ADAM17,NCSTN,HM13,SPPL2B
GO: Biological Process	GO:0086010	membrane depolarization during action potential		8.724e-06	0.07107	0.0002744	0.00263	15	44	CACNA1I,CACNA1H,CACNA1G,CACNA1A,CACNA1B,CACNA1C,CACNA2D1,NALCN,SCN1A,SCN1B,SCN2A,SCN7A,SCN8A,SCN3B,KCNH2
GO: Biological Process	GO:0006497	protein lipidation		8.776e-06	0.0715	0.000275	0.002635	22	83	HHATL,GPAA1,ZDHHC8,SELENOK,PIGC,PIGH,ALG5,ZDHHC5,PIGG,PIGX,ATG10,PIGK,PIGU,ZDHHC9,PGAP1,ZDHHC16,PIGT,PIGO,ZDHHC17,ZDHHC6,PGAP3,PORCN
GO: Biological Process	GO:0060080	inhibitory postsynaptic potential		9.068e-06	0.07388	0.000282	0.002702	10	21	ADRB1,NLGN2,BDNF,NTSR1,NLGN3,CX3CL1,NLGN1,GABRB3,GRIK1,GRIK2
GO: Biological Process	GO:0042987	amyloid precursor protein catabolic process		9.068e-06	0.07388	0.000282	0.002702	10	21	CLU,CLN3,ABCG1,PSEN1,PSEN2,DHCR24,APH1A,SORL1,NCSTN,LRRTM3
GO: Biological Process	GO:0097466	ubiquitin-dependent glycoprotein ERAD pathway		9.432e-06	0.07684	0.0002922	0.0028	5	5	EDEM1,FBXO6,EDEM3,EDEM2,MAN1B1
GO: Biological Process	GO:0006835	dicarboxylic acid transport		9.976e-06	0.08127	0.0003078	0.00295	25	102	SLC17A8,BDNF,NPY5R,NTRK2,NTSR1,CCK,SLC13A5,PSEN1,SLC26A8,CLN8,ARL6IP5,SLC19A2,SLC1A1,SLC1A6,PDPN,SLC19A1,GABBR1,ARL6IP1,SYT1,GRIN2B,GRM2,GRM7,HTR6,SLC26A10,SLC17A7
GO: Biological Process	GO:0007420	brain development		1.016e-05	0.08281	0.0003125	0.002995	110	760	MAG,MAS1,DSCAML1,MET,PCDH19,ATRN,SEMA7A,APLP2,APP,UNC5C,SLC17A8,ATP2B1,ATP2B2,ATP2B4,NAGLU,NCAM1,NDUFS4,NRP2,NRP1,BMP4,NFIB,NPY,CACNA1A,CNTN4,NTRK2,CD9,SYNGR3,CDH2,PCDH9,NOG,WNT4,CHRNB2,SLIT2,NRXN1,CLN5,PLXNA2,CNTN1,COL3A1,DDIT4,SLC4A7,MBOAT7,TSKU,PPT1,CNTNAP2,PLXNA4,SLITRK5,CTNS,RELN,PSEN1,PSEN2,SEMA4C,PTPRS,TCTN1,E2F1,CRTAC1,SEZ6L2,EFNA2,CELSR2,TMEM57,SYPL2,ROBO1,ROBO2,SDF4,EPHA5,SEZ6,EPHA7,EPH…
GO: Biological Process	GO:0016125	sterol metabolic process		1.067e-05	0.0869	0.0003267	0.003131	32	148	ABCA2,APLP2,APP,MBTPS1,CYP7B1,POR,ABCG1,CYP51A1,DHCR7,DHCR24,CLN6,CLN8,MBTPS2,NPC2,SCAP,EBP,CYB5R1,SORL1,SQLE,CYP46A1,DGAT2,EBPL,STARD3,C14orf1,TM7SF2,HMGCR,VLDLR,LMF1,INSIG1,LDLR,LIPA,LRP1
GO: Biological Process	GO:0051094	positive regulation of developmental process		1.092e-05	0.08893	0.0003331	0.003192	175	1329	MAG,MAN2A1,ACHE,ACVR1,ACVR1B,ACVR2A,ACVR2B,SLITRK1,AMIGO1,MET,ADRB1,KIDINS220,JAG1,NLGN2,MMP14,ISLR2,SEMA7A,IFITM1,CAPRIN2,BRINP2,ATP6AP1,ADAM9,ADGRB1,ADGRB2,ADGRB3,NCAM1,BDNF,NRP1,NELL1,BMP4,BMP7,NEU1,TSPO,VWC2L,NPPC,CALCA,NRCAM,CALR,NTRK2,NTRK3,CD34,ADGRE5,CDH2,NOG,PDGFRB,PDLIM7,WNT4,CD83,SLIT2,NLGN3,NRXN3,NRXN1,CLU,PDCL3,PLA2G4A,BAMBI,CNTN1,COL1A1,EEF1E1,POR,PPIB,TMEM106B,LRRN3,TENM4,LRRTM2,SL…
GO: Biological Process	GO:0006027	glycosaminoglycan catabolic process		1.141e-05	0.09293	0.0003468	0.003323	18	61	HYAL2,NAGLU,OMD,CD44,VCAN,SDC3,SLC9A1,CSPG5,FUCA1,GALNS,GPC3,GLB1,GNS,GPC1,HGSNAT,AGRN,HEXA,CEMIP
GO: Biological Process	GO:0044712	single-organism catabolic process		1.211e-05	0.09869	0.0003669	0.003516	152	1127	MAN2B1,MANBA,ACHE,ABHD6,DNAJB9,ADRA1B,ADRB1,NCEH1,MMP2,MMP14,MMP15,MMP16,AMFR,PEX3,ATP1B1,ATP2B4,HYAL2,AUP1,ADAM15,NAGA,NEU1,BPGM,SGPL1,TSPO,DAGLA,DAGLB,CALCA,NTSR1,OMD,STT3B,FURIN,ENTPD2,ENTPD3,CD44,ZDHHC8,CIDEA,PCYOX1L,KIAA1549L,DNAJC10,YIPF1,TMEM259,PLA2G4A,PLOD2,COL1A1,COL3A1,DDIT4,COL8A1,COL11A2,COL12A1,COL19A1,DERL1,POR,PPT1,VCAN,EDEM1,CTSB,CTSK,ABHD12,CTSL,HERPUD1,CTSS,BOC,KLK6,FBXO6,ENPP5…
GO: Biological Process	GO:0006818	hydrogen transport		1.271e-05	0.1035	0.0003834	0.003674	33	156	ATP1A1,ATP1A3,ATP6V0B,ATP6V0A1,ATP6AP1,NDUFA4,ATP6V0E1,SLC25A14,SLC33A1,SLC2A8,COX4I1,TMCO3,SLC23A2,SLC35A5,SLC17A5,SLC9A6,STOML2,SLC35A1,SLC9A1,SLC9A2,SLC9A5,SLC15A2,SLC15A4,SLC9A9,SURF1,SLC9A8,SLC35A3,SLC2A6,MFSD3,PARK7,SLC35A2,SLC30A5,SLC4A10
GO: Biological Process	GO:0031589	cell-substrate adhesion		1.285e-05	0.1047	0.0003863	0.003702	56	324	MMP14,ADAM15,ADAM9,SGCE,DDR1,NPY2R,CALR,WHAMM,CD34,CD44,HACD1,CDH13,WNT4,PLAU,COL1A1,COL3A1,COL8A1,COL16A1,CTGF,EPDR1,SEMA3E,DAG1,SPOCK2,SIRPA,PTPRJ,PTPRK,PTPRO,NPNT,NDNF,EDIL3,EFNA1,EPHA3,EPHB1,EPHB3,MERTK,FLNA,FBLN5,FN1,SLC9A1,EGFLAM,SPOCK1,SPP1,GAS6,SMOC2,GPM6B,EMILIN1,THY1,TYRO3,VEGFC,ITGA6,ITGA3,ITGA7,ITGAV,ITGB8,LAMC1,BCAM
GO: Biological Process	GO:0042158	lipoprotein biosynthetic process		1.301e-05	0.106	0.0003897	0.003735	23	91	HHATL,GPAA1,P4HB,ZDHHC8,SELENOK,PIGC,PIGH,ALG5,ZDHHC5,PIGG,PIGX,ATG10,PIGK,PIGU,ZDHHC9,PGAP1,ZDHHC16,PIGT,PIGO,ZDHHC17,ZDHHC6,PGAP3,PORCN
GO: Biological Process	GO:0021952	central nervous system projection neuron axonogenesis		1.314e-05	0.1071	0.0003921	0.003758	11	26	NFIB,CDH11,CHRNB2,SLIT2,TSKU,PLXNA4,EPHA4,EPHB1,EPHB2,EPHB3,SCN1B
GO: Biological Process	GO:0019885	antigen processing and presentation of endogenous peptide antigen via MHC class I		1.328e-05	0.1082	0.0003949	0.003784	8	14	ABCB1,ABCB4,TAP1,TAP2,TAPBP,ABCB9,HFE,HLA-A
GO: Biological Process	GO:0070588	calcium ion transmembrane transport		1.425e-05	0.1161	0.0004222	0.004046	49	272	SLC24A3,STIM2,ASPH,ATP1B1,ATP2B1,ATP2B2,ATP2B3,ATP2B4,BMP4,CACNA1I,CACNA1H,CACNA1G,CACNA1A,CACNA1B,CACNA1C,CACNA2D1,NTSR1,OPRL1,CBARP,SLC24A2,GSTO1,CYBA,TRPM4,PSEN1,ATP2C2,CACNG8,NPSR1,TRPV2,ORAI2,SLC8A2,SLC9A1,ATP2C1,TSPAN13,CACNA2D3,GAS6,GPM6A,GRIN1,GRM7,IL1RAPL1,THY1,ORAI3,TRPC1,TRPC4,TRPM2,PANX1,ITGAV,SELENON,MCOLN1,CEMIP
GO: Biological Process	GO:0044057	regulation of system process		1.478e-05	0.1204	0.0004362	0.00418	89	590	MAG,ACVR2A,ADORA2B,ADRA1D,ADRA1B,ADRB1,NLGN2,MMP2,ASPH,ATP1A1,ATP1A3,ATP1B1,ATP2B1,ATP2B2,ATP2B3,ATP2B4,DGAT1,FXYD6,NCAM1,CACNA1H,CACNA1G,CACNA1B,CACNA1C,CACNA2D1,NPPC,NPR2,NPY1R,NPY2R,CALCA,NTSR1,NUCB2,CCK,CCKBR,OPRL1,P2RX4,KCNB2,CHRM1,CHRM3,NLGN3,GSTO1,EIF2AK3,COMT,CRHBP,TENM4,CTGF,CTSS,CXADR,CYBA,TRPM4,PTGS2,KCNG2,PTPRM,PTPRO,NPNT,HBEGF,ECE1,CACNG8,SCPEP1,NPSR1,SCN1B,FGFR1,CX3CL1,NLGN1,SLC1A1,…
GO: Biological Process	GO:0051270	regulation of cellular component movement		1.51e-05	0.123	0.0004442	0.004257	121	861	ABHD6,ACVR1,ACVR1B,ADAM10,MET,ADRB1,JAG1,MMP2,MMP14,ABCC1,SEMA7A,IFITM1,UNC5C,PODN,ATP1A1,HYAL2,ADAM15,ADAM9,NRP2,NRP1,BMP4,BMPER,CACNA1C,CALR,NTRK3,FURIN,CD81,CDH13,NOG,PDGFRA,PDGFRB,WNT4,SLIT2,SELENOK,PLAU,PLXNA1,PLXNA2,WDR44,COL1A1,COL3A1,NRG2,CXCL14,PLXNA4,SDC3,SEMA3E,TRPM4,RELN,DAG1,PTGS2,SEMA4C,PTPRJ,PTPRK,PTPRM,PTPRO,PTPRR,DRD5,DSCAM,HBEGF,PTPRU,ECM1,MEMO1,EFNA1,MEGF8,PLXNC1,ROBO1,LGR6,EGF…
GO: Biological Process	GO:0006026	aminoglycan catabolic process		1.567e-05	0.1276	0.0004591	0.0044	19	68	CHID1,HYAL2,NAGLU,OMD,CD44,VCAN,SDC3,SLC9A1,CSPG5,FUCA1,GALNS,GPC3,GLB1,GNS,GPC1,HGSNAT,AGRN,HEXA,CEMIP
GO: Biological Process	GO:0051050	positive regulation of transport		1.573e-05	0.1282	0.0004594	0.004402	144	1062	ACHE,ACVR2A,ADCYAP1R1,AMIGO1,ADORA2B,MET,ADRB1,SCAMP5,NLGN2,STIM2,ASPH,ATP1B1,ATP2B2,HYAL2,ATP6AP1,ADAM9,BMP4,NELL2,NFKBIA,TSPO,CACNA1I,CACNA1H,CACNA1G,NMB,CACNA1B,CACNA2D1,NPY2R,CALR,HCN1,NTSR1,NUCB2,CCK,CCKBR,OPRL1,P2RX4,CD34,SYNGR3,CD47,CDH2,PDGFRB,CHRM1,ZDHHC8,CHRNB2,ABCB4,NLGN3,SELENOK,RAB9A,PLA2G4A,BAMBI,GSTO1,CNTN1,MPC2,ABCG1,PPT1,CALY,LEPROT,EDEM1,CTSK,CTSS,CYBA,TRPM4,RELN,SIRPA,PTGS2,C2C…
GO: Biological Process	GO:0030282	bone mineralization		1.597e-05	0.1301	0.0004646	0.004452	26	111	ACVR1,ACVR2A,ACVR2B,MGP,RSPO2,NELL1,BMP4,BMP7,OMD,WNT4,PLA2G4A,EIF2AK3,MINPP1,TRPM4,PTGS2,PTH1R,ECM1,LGR4,ATRAID,MIA3,GLA,GPC3,GPM6B,ANKH,FAM20C,LTBP3
GO: Biological Process	GO:0006983	ER overload response		1.82e-05	0.1483	0.0005258	0.005038	7	11	EIF2AK3,ATG10,SELENOS,PPP1R15B,HSPA5,WFS1,CCDC47
GO: Biological Process	GO:0021891	olfactory bulb interneuron development		1.82e-05	0.1483	0.0005258	0.005038	7	11	SLIT2,ROBO1,ROBO2,FGFR1,SLIT1,SLIT3,WNT5A
GO: Biological Process	GO:0007613	memory		1.869e-05	0.1523	0.000538	0.005156	28	125	ADCY8,ADRB1,ATP1A3,NTRK2,NOG,CHRNB2,SLC24A2,CYP7B1,CHST10,COMT,CTNS,RELN,PSEN1,PSEN2,PTGS2,KCNK4,RASGRF1,SLC8A2,SORCS3,GRIA1,GRIN1,GRIN2B,GRM7,ATAD1,KLK8,VLDLR,ITGA3,SLC17A7
GO: Biological Process	GO:0033555	multicellular organismal response to stress		1.907e-05	0.1553	0.00054	0.005175	23	93	ADCYAP1R1,ADRB1,NCAM1,BDNF,TSPO,CACNA1A,CACNA1B,NPY2R,CALCA,CCK,COMT,RELN,BRINP1,GABRA5,GJA4,GRIK1,GRIK2,GRIN2B,GRM7,VDAC3,HTR1A,VWA1,SELENON
GO: Biological Process	GO:0097104	postsynaptic membrane assembly		1.916e-05	0.1561	0.00054	0.005175	6	8	NLGN2,CDH2,NLGN3,NRXN1,NRXN2,NLGN1
GO: Biological Process	GO:0015781	pyrimidine nucleotide-sugar transport		1.916e-05	0.1561	0.00054	0.005175	6	8	SLC35C2,SLC35B1,SLC35A1,SLC35A3,SLC35B4,SLC35A2
GO: Biological Process	GO:0002589	regulation of antigen processing and presentation of peptide antigen via MHC class I		1.916e-05	0.1561	0.00054	0.005175	6	8	ABCB1,ABCB4,TAP1,TAP2,ABCB9,HFE
GO: Biological Process	GO:0002481	antigen processing and presentation of exogenous protein antigen via MHC class Ib, TAP-dependent		1.916e-05	0.1561	0.00054	0.005175	6	8	ABCB1,ABCB4,TAP1,TAP2,ABCB9,HLA-G
GO: Biological Process	GO:0002477	antigen processing and presentation of exogenous peptide antigen via MHC class Ib		1.916e-05	0.1561	0.00054	0.005175	6	8	ABCB1,ABCB4,TAP1,TAP2,ABCB9,HLA-G
GO: Biological Process	GO:0031346	positive regulation of cell projection organization		2.033e-05	0.1656	0.0005711	0.005473	61	368	ACHE,TENM2,AMIGO1,MET,KIDINS220,NLGN2,ISLR2,SEMA7A,CAPRIN2,BDNF,NRP1,BMP4,BMP7,NEU1,NTRK2,NTRK3,SLIT2,NLGN3,CNTN1,TMEM106B,RELN,PSEN1,PTK7,PTPRD,NDNF,DSCAM,MEGF8,TENM1,ROBO1,ROBO2,EPHA3,EPHA4,SEZ6,EFEMP1,SCN1B,TRPV2,FGFR1,CXCL12,SEMA4D,FN1,SYT3,NLGN1,NPTN,TMEM30A,ATP8A2,SYT1,SYT4,GPM6A,GRN,IL1RAPL1,AGRN,PLXNB2,VLDLR,WNT5A,IGF1R,IL1RAP,ITGA3,MOB2,RGMA,KIT,L1CAM
GO: Biological Process	GO:0042157	lipoprotein metabolic process		2.061e-05	0.1679	0.000577	0.005529	30	139	HHATL,GPAA1,P4HB,ZDHHC8,SELENOK,PIGC,PIGH,ALG5,ZDHHC5,ABCG1,PPT1,PIGG,PIGX,ATG10,PIGK,PIGU,ZDHHC9,PGAP1,ZDHHC16,PIGT,DGAT2,PIGO,ZDHHC17,ZDHHC6,PGAP3,PORCN,ITGAV,LDLR,LPL,LRP1
GO: Biological Process	GO:0008344	adult locomotory behavior		2.173e-05	0.1771	0.0006064	0.005811	24	100	NLGN2,APP,ADAM22,ATP1A3,CACNA1A,CACNA1C,NTSR1,CLCN3,PPT1,CTNS,ABHD12,SEZ6L2,EPHA4,SEZ6,CLN8,SCN1A,SCN8A,CXCL12,GLRB,GRIN1,SEZ6L,HEXA,PARK7,UCHL3
GO: Biological Process	GO:0048585	negative regulation of response to stimulus		2.195e-05	0.1788	0.0006103	0.005848	195	1526	MC4R,ACVR1,MET,ADRA1B,MMP14,SEMA7A,VASN,LRRC4C,DLK2,PODN,CHID1,ATP2B4,HYAL2,NRP1,BMP4,BMP7,NFKBIA,TSPO,VWC2L,BMPER,NPY2R,NPY5R,CALCA,CALR,NUCB2,WFDC1,CAV2,BCDIN3D,CREB3L1,CCK,CD34,CD44,CDH2,NOG,PDGFRA,WNT4,CIDEA,SLIT2,NLGN3,NRXN1,CLU,CLN3,STOML1,CYP7B1,BAMBI,PLAT,PLAU,GSTO1,COL3A1,DDIT4,CR1L,CRHBP,TSKU,LEPROT,DNAJC3,HERPUD1,PRNP,SEMA3E,LGMN,MASP1,PSAP,PSEN1,PSEN2,PSMA1,PSMB10,CD55,DAG1,PSME2,SEMA…
GO: Biological Process	GO:0046165	alcohol biosynthetic process		2.203e-05	0.1795	0.0006105	0.00585	33	160	ACHE,MAS1,ADCYAP1R1,CACNA1H,NTSR1,WNT4,PLA2G4A,POR,ABCG1,CYP51A1,PTH1R,LPCAT2,DHCR7,DHCR24,DPAGT1,LPCAT1,ACER3,ACSL3,CEPT1,SPTLC1,SCAP,EBP,DKK3,CYB5R1,SQLE,GBA,GPAT4,C14orf1,TM7SF2,PARK7,HMGCR,INSIG1,CHPT1
GO: Biological Process	GO:0016358	dendrite development		2.211e-05	0.1801	0.0006105	0.00585	44	239	ACHE,MATN2,SLC12A5,MET,KIDINS220,NLGN2,APP,CAPRIN2,ADGRB3,BDNF,NRP1,BMP7,SDK1,CACNA1A,NTRK2,CHRNB2,NLGN3,TMEM106B,SLITRK5,RELN,PSEN1,KIAA0319,PTPRD,DSCAM,EFNA1,CELSR2,ROBO1,EPHA4,EPHA5,SEZ6,EPHB1,EPHB2,EPHB3,ACSL4,SLC9A6,SEMA4D,NLGN1,FSTL4,GRN,GRIN1,IL1RAPL1,FLRT1,VLDLR,IL1RAP
GO: Biological Process	GO:0006509	membrane protein ectodomain proteolysis		2.322e-05	0.1892	0.0006392	0.006125	14	42	ADAM10,ADAM9,FURIN,PSEN1,PSEN2,DAG1,APH1A,ADAM17,SPPL3,NCSTN,TIMP2,BACE1,HM13,SPPL2B
GO: Biological Process	GO:0006644	phospholipid metabolic process		2.475e-05	0.2017	0.000679	0.006507	68	426	ACHE,ABHD6,SERINC1,DGKE,GPAA1,CDS2,LPCAT4,CCKBR,CD81,PDGFRA,PDGFRB,PIGC,PIGH,CLN3,PI4KA,ALG5,PLA2G4A,MBOAT7,NRG2,FITM2,ABHD12,PTDSS1,PIGG,PLPPR1,PLPPR4,LPCAT2,PIGX,SRD5A3,PIGK,HBEGF,PIGU,EPHA8,CLN8,LPCAT1,AGPAT5,PLPPR3,SH3YL1,ACSL3,CEPT1,PGAP1,CDIPT,FGFR1,STOML2,DOLK,SPTLC1,GDE1,PIGT,SMPD1,ACSL5,MBOAT2,SMPDL3B,SERINC3,GPAT4,PIGO,TAZ,GPCPD1,PGAP3,PLA2G15,PLPPR2,VAV1,AGPAT3,AGPAT4,PTDSS2,CHPT1,PLA2…
GO: Biological Process	GO:0015992	proton transport		2.494e-05	0.2032	0.0006817	0.006533	32	154	ATP1A1,ATP1A3,ATP6V0B,ATP6V0A1,ATP6AP1,NDUFA4,ATP6V0E1,SLC25A14,SLC33A1,SLC2A8,COX4I1,TMCO3,SLC35A5,SLC17A5,SLC9A6,STOML2,SLC35A1,SLC9A1,SLC9A2,SLC9A5,SLC15A2,SLC15A4,SLC9A9,SURF1,SLC9A8,SLC35A3,SLC2A6,MFSD3,PARK7,SLC35A2,SLC30A5,SLC4A10
GO: Biological Process	GO:0006928	movement of cell or subcellular component		2.581e-05	0.2103	0.0007032	0.006739	234	1888	MAG,MATN2,ABHD6,ACVR1,ACVR1B,ADAM10,TENM2,UNC5A,MET,ADRB1,JAG1,MMP2,MMP14,RSPH9,AMFR,ABCC1,SEMA7A,IFT81,IFITM1,APP,TCAP,UNC5C,PODN,ASTN1,ATP1A1,ATP1B1,ATP2B4,HYAL2,ADAM15,ADAM9,NCAM1,NDN,BDNF,NRP2,NRP1,BMP4,BMP7,NEO1,BSG,NFIB,SGPL1,TSPO,CACNA1I,BMPER,NPY,CACNA1C,CNTN4,DDR1,CACNA2D1,CALCA,NRCAM,CALR,NTRK2,NTRK3,CCK,CD9,SLC16A3,CD34,FURIN,CD44,CD47,CD81,ADGRE5,CDH2,CDH13,NOG,PDGFRA,PDGFRB,WNT4,SLIT…
GO: Biological Process	GO:0097090	presynaptic membrane organization		2.604e-05	0.2122	0.0007072	0.006777	8	15	NLGN2,CDH2,NLGN3,NRXN1,PTPRD,LRRTM4,NLGN1,IL1RAPL1
GO: Biological Process	GO:0071705	nitrogen compound transport		2.617e-05	0.2132	0.0007084	0.006789	122	880	SEH1L,AQP11,MC4R,ACVR2B,SLC12A5,ADORA2B,SERINC1,NLGN2,LTBP4,ABCC1,PEX3,SLC7A14,SLC17A8,DGAT1,BDNF,BMP7,SLC5A6,NFKBIA,CACNA1A,NPM1,CACNA1C,NPY2R,NPY5R,NTRK2,NTSR1,NUCB2,CCK,CCKBR,CHRNB2,ABCB1,NRXN1,CLN3,EIF2AK3,MPC2,CRHBP,CTNS,TRPM4,PSEN1,SIDT1,TOMM20,PTGS2,C2CD2L,KCNG2,SLC38A10,PTPRN,PTPRN2,SLC52A2,SLC23A2,SLC35B3,SLC35C2,MAGOHB,SLC6A15,SLC17A5,SIDT2,EPHA5,SLC35B1,CLN8,SLC35E3,CXCL12,THOC7,SRSF5,…
GO: Biological Process	GO:0060041	retina development in camera-type eye		2.873e-05	0.2341	0.0007751	0.007428	33	162	MAN2A1,ACHE,ACVR2B,SLC17A8,ATP2B1,ATP2B4,NRP1,BMP4,SDK1,HCN1,NTRK2,PDGFRA,PDGFRB,CLCN2,SDK2,SLC4A7,NECTIN3,PSEN1,CASZ1,PTPRM,NECTIN1,DSCAM,RPGR,CLN8,LPCAT1,MERTK,ATP8A2,GPM6A,THY1,UCHL3,HPS1,FJX1,SLC17A7
GO: Biological Process	GO:0006493	protein O-linked glycosylation		3.083e-05	0.2512	0.000829	0.007944	24	102	C1GALT1C1,LARGE1,B4GALT5,ALG5,POMT2,FKRP,GALNT9,DAG1,GALNT14,SLC35C2,TMEM5,SPON1,POMK,SDF2,POMGNT1,ST3GAL3,POMT1,GALNT11,EOGT,GALNT1,ADAMTSL1,B4GAT1,POMGNT2,POGLUT1
GO: Biological Process	GO:1901136	carbohydrate derivative catabolic process		3.181e-05	0.2592	0.0008526	0.00817	36	184	MANBA,CHID1,HYAL2,NAGA,NAGLU,NEU1,OMD,STT3B,CD44,VCAN,SDC3,EDEM1,ABHD12,FBXO6,NUDT18,NT5C3A,NAGK,EDEM3,SLC9A1,CSPG5,EDEM2,FUCA1,FUCA2,GALNS,GBA,GLA,GPC3,GLB1,GM2A,GNS,GPC1,HGSNAT,AGRN,MAN1B1,HEXA,CEMIP
GO: Biological Process	GO:0042339	keratan sulfate metabolic process		3.309e-05	0.2696	0.0008811	0.008443	12	33	CHST1,B4GALT4,OMD,B4GALT5,CHST2,ST3GAL6,ST3GAL3,GALNS,GLB1,GNS,B4GAT1,HEXA
GO: Biological Process	GO:0006506	GPI anchor biosynthetic process		3.309e-05	0.2696	0.0008811	0.008443	12	33	GPAA1,PIGC,PIGH,ALG5,PIGG,PIGX,PIGK,PIGU,PGAP1,PIGT,PIGO,PGAP3
GO: Biological Process	GO:0032102	negative regulation of response to external stimulus		3.607e-05	0.2939	0.0009572	0.009173	54	320	SEMA7A,CHID1,NRP1,TSPO,NPY5R,NUCB2,WFDC1,CCK,CD34,CD44,PDGFRA,WNT4,SLIT2,NRXN1,CLN3,PLAT,PLAU,SEMA3E,PSMA1,SEMA4C,QSOX1,PTPRO,ROBO1,ROBO2,EPHA4,RYK,SEMA6C,SEMA3F,SEMA6B,SEMA4F,SEMA4D,SEMA4B,SEMA3C,SLIT1,SELENOS,SPP1,GBA,SMPDL3B,SEMA4A,GPR17,GRIN1,NDFIP1,GSTP1,THBD,TSPAN6,KLK8,TNFAIP6,TNFRSF1A,TNR,HMGCR,TYRO3,WNT5A,RGMA,SHARPIN
GO: Biological Process	GO:0051968	positive regulation of synaptic transmission, glutamatergic		3.842e-05	0.313	0.001016	0.009738	10	24	NLGN2,NTRK2,CCKBR,NLGN3,NRXN1,RELN,PTGS2,NLGN1,GRIA4,TNR
GO: Biological Process	GO:1902287	semaphorin-plexin signaling pathway involved in axon guidance		4.002e-05	0.326	0.001055	0.01011	7	12	NRP1,PLXNA1,PLXNA2,PLXNA4,PLXNC1,SEMA3F,PLXNB2
GO: Biological Process	GO:0045666	positive regulation of neuron differentiation		4.243e-05	0.3457	0.001112	0.01066	61	377	ACHE,AMIGO1,MET,KIDINS220,NLGN2,ISLR2,SEMA7A,CAPRIN2,BRINP2,BDNF,NRP1,BMP4,BMP7,NEU1,VWC2L,NRCAM,NTRK2,NTRK3,SLIT2,NLGN3,CNTN1,TMEM106B,RELN,PSEN1,BRINP1,PTK7,PTPRD,NDNF,DSCAM,MEGF8,ROBO1,ROBO2,EPHA3,EPHA4,SEZ6,SCN1B,TRPV2,FGFR1,CXCL12,SEMA4D,FN1,SYT3,NLGN1,NPTN,TMEM30A,ATP8A2,SYT1,SYT4,GRN,IL1RAPL1,TIMP2,PLXNB2,VLDLR,WNT5A,IGF1R,IL1RAP,BRINP3,ITGA3,MOB2,RGMA,L1CAM
GO: Biological Process	GO:0055067	monovalent inorganic cation homeostasis		4.246e-05	0.3459	0.001112	0.01066	32	158	AQP11,SLC12A5,ATP1A1,ATP1A3,ATP1B1,ATP6V0B,ATP6V0A1,ATP6AP1,CA4,ATP6V0E1,CLCN3,CLN3,CLN5,SLC4A7,COMT,PPT1,SLC26A8,CLN6,SCN7A,SLC9A6,GPR89B,TMEM175,SLC9A1,SLC9A2,SLC9A5,SLC9A9,TMEM165,SLC9A8,SLC26A10,KCNH2,SLC17A7,SLC4A10
GO: Biological Process	GO:0051899	membrane depolarization		4.323e-05	0.3522	0.001129	0.01082	24	104	TSPO,CACNA1I,CACNA1H,CACNA1G,CACNA1A,CACNA1B,CACNA1C,CACNA2D1,HCN1,NTSR1,CCK,P2RX4,CHRNB2,NALCN,TRPM4,SCN1A,SCN1B,SCN2A,SCN7A,SCN8A,SCN3B,GRIK1,PARK7,KCNH2
GO: Biological Process	GO:0016485	protein processing		4.426e-05	0.3606	0.001152	0.01104	56	338	ADAM10,MMP14,PRSS12,SPCS1,TMEM208,ASPH,SEC11C,RHBDL1,CCK,FURIN,PCSK5,PCSK2,CLN3,CLN5,PLAT,EIF2AK3,FKRP,TMEM59,CPD,CPE,CR1L,CTSS,CTSZ,APH1B,LGMN,MASP1,KLK6,PSEN1,PSEN2,SPCS2,CD55,DHCR24,SUSD4,ECE1,APH1A,ATP6AP2,ROBO1,ZMPSTE24,PARL,STOML2,SCG5,PLGRKT,GAS6,PERP,GLG1,AFG3L2,SPPL3,NCSTN,CHST8,SEC11A,CPXM1,SPCS3,ERO1B,XDH,HM13,SPPL2B
GO: Biological Process	GO:0070861	regulation of protein exit from endoplasmic reticulum		4.533e-05	0.3693	0.001169	0.0112	9	20	EDEM1,DERL2,BCAP31,UBAC2,EDEM2,TMEM30A,SORL1,ERLEC1,OS9
GO: Biological Process	GO:0006490	oligosaccharide-lipid intermediate biosynthetic process		4.533e-05	0.3693	0.001169	0.0112	9	20	ALG8,ALG6,ALG12,DPAGT1,SRD5A3,ALG9,DOLK,ALG1,ALG2
GO: Biological Process	GO:0006488	dolichol-linked oligosaccharide biosynthetic process		4.533e-05	0.3693	0.001169	0.0112	9	20	ALG8,ALG6,ALG12,DPAGT1,SRD5A3,ALG9,DOLK,ALG1,ALG2
GO: Biological Process	GO:0051453	regulation of intracellular pH		4.563e-05	0.3717	0.00117	0.01121	20	79	AQP11,SLC12A5,ATP6V0B,ATP6V0A1,ATP6V0E1,CLCN3,CLN3,CLN5,SLC4A7,PPT1,SLC26A8,CLN6,GPR89B,TMEM175,SLC9A1,TMEM165,SLC9A8,SLC26A10,SLC17A7,SLC4A10
GO: Biological Process	GO:0036498	IRE1-mediated unfolded protein response		4.635e-05	0.3776	0.00117	0.01121	18	67	DNAJB9,SRPRB,TPP1,EDEM1,DNAJC3,BFAR,EXTL3,HYOU1,SYVN1,DNAJB11,SRPRA,SSR1,MYDGF,TMBIM6,SEC62,SEC63,HSPA5,WFS1
GO: Biological Process	GO:0030574	collagen catabolic process		4.635e-05	0.3776	0.00117	0.01121	18	67	MMP2,MMP14,MMP15,MMP16,ADAM15,FURIN,COL1A1,COL3A1,COL8A1,COL11A2,COL12A1,COL19A1,CTSB,CTSK,CTSL,CTSS,KLK6,COL18A1
GO: Biological Process	GO:1904587	response to glycoprotein		4.658e-05	0.3795	0.00117	0.01121	5	6	EDEM1,FBXO6,EDEM3,EDEM2,MAN1B1
GO: Biological Process	GO:0021825	substrate-dependent cerebral cortex tangential migration		4.658e-05	0.3795	0.00117	0.01121	5	6	NRP2,NRP1,SLIT2,ROBO1,FGFR1
GO: Biological Process	GO:0002591	positive regulation of antigen processing and presentation of peptide antigen via MHC class I		4.658e-05	0.3795	0.00117	0.01121	5	6	ABCB1,ABCB4,TAP1,TAP2,ABCB9
GO: Biological Process	GO:0021955	central nervous system neuron axonogenesis		4.666e-05	0.3802	0.00117	0.01121	12	34	NFIB,CDH11,CHRNB2,SLIT2,TSKU,PLXNA4,TCTN1,EPHA4,EPHB1,EPHB2,EPHB3,SCN1B
GO: Biological Process	GO:0048169	regulation of long-term neuronal synaptic plasticity		4.666e-05	0.3802	0.00117	0.01121	12	34	BDNF,SYNGR1,DRD5,EPHB2,NPTN,SYP,GRIK1,GRIK2,GRIN1,GRIN2B,GRM5,KIT
GO: Biological Process	GO:0001941	postsynaptic membrane organization		4.666e-05	0.3802	0.00117	0.01121	12	34	NLGN2,CDH2,NLGN3,NRXN1,NRXN2,RELN,LRRTM4,NLGN1,GLRB,RER1,AGRN,HTR1A
GO: Biological Process	GO:0001649	osteoblast differentiation		4.757e-05	0.3875	0.001187	0.01138	41	224	ACHE,ACVR1,ACVR2A,ACVR2B,JAG1,SEMA7A,RDH14,IFITM1,RSPO2,ATP6AP1,NELL1,BMP3,BMP4,BMP7,NPPC,CREB3L1,NOG,PDLIM7,WNT4,COL1A1,VCAN,TRPM4,PTH1R,NPNT,ERH,LGR4,RRBP1,ATRAID,FGFR1,SEMA4D,SFRP2,GABBR1,SPP1,BCAP29,UFL1,WNT7B,IGFBP5,IL6ST,FAM20C,CCDC47,UCMA
GO: Biological Process	GO:1903830	magnesium ion transmembrane transport		4.766e-05	0.3883	0.001187	0.01138	8	16	NIPA1,ZDHHC13,CNNM4,MAGT1,ZDHHC17,NIPA2,TUSC3,NIPAL3
GO: Biological Process	GO:0010720	positive regulation of cell development		4.807e-05	0.3916	0.001194	0.01144	85	575	MAG,MAN2A1,ACHE,AMIGO1,MET,ADRB1,KIDINS220,NLGN2,ISLR2,SEMA7A,CAPRIN2,BRINP2,ATP6AP1,BDNF,NRP1,BMP4,BMP7,NEU1,TSPO,VWC2L,NRCAM,CALR,NTRK2,NTRK3,NOG,SLIT2,NLGN3,BAMBI,CNTN1,COL1A1,TMEM106B,TENM4,RELN,PSEN1,BRINP1,PTK7,PTPRA,PTPRD,NDNF,DSCAM,MEGF8,ROBO1,ROBO2,EPHA3,EPHA4,SEZ6,EPHB2,SCN1B,TRPV2,FGFR1,CX3CL1,CXCL12,SEMA4D,FLNA,FN1,SYT3,NLGN1,NPTN,TMEM30A,ATP8A2,SYT1,SYT4,UFL1,GRN,GRM5,TF,IL1RAPL1,TIM…
GO: Biological Process	GO:0015780	nucleotide-sugar transport		5.274e-05	0.4296	0.001286	0.01233	6	9	SLC35C2,SLC35B1,SLC35A1,SLC35A3,SLC35B4,SLC35A2
GO: Biological Process	GO:1904861	excitatory synapse assembly		5.274e-05	0.4296	0.001286	0.01233	6	9	NLGN2,NRXN1,NRXN2,RELN,NPTN,WNT5A
GO: Biological Process	GO:0002484	antigen processing and presentation of endogenous peptide antigen via MHC class I via ER pathway		5.274e-05	0.4296	0.001286	0.01233	6	9	ABCB1,ABCB4,TAP1,TAP2,ABCB9,HLA-A
GO: Biological Process	GO:0035751	regulation of lysosomal lumen pH		5.274e-05	0.4296	0.001286	0.01233	6	9	CLN3,CLN5,PPT1,CLN6,TMEM175,TMEM165
GO: Biological Process	GO:0097105	presynaptic membrane assembly		5.274e-05	0.4296	0.001286	0.01233	6	9	NLGN2,NLGN3,NRXN1,PTPRD,NLGN1,IL1RAPL1
GO: Biological Process	GO:0002585	positive regulation of antigen processing and presentation of peptide antigen		5.274e-05	0.4296	0.001286	0.01233	6	9	TREM2,ABCB1,ABCB4,TAP1,TAP2,ABCB9
GO: Biological Process	GO:0007040	lysosome organization		5.365e-05	0.4371	0.001301	0.01247	16	56	ACP2,MBTPS1,NAGLU,TPP1,CLN3,CLN5,GNPTAB,TMEM106B,PPT1,CLN6,CLN8,TMEM175,GAA,TMEM165,HEXA,HPS1
GO: Biological Process	GO:0080171	lytic vacuole organization		5.365e-05	0.4371	0.001301	0.01247	16	56	ACP2,MBTPS1,NAGLU,TPP1,CLN3,CLN5,GNPTAB,TMEM106B,PPT1,CLN6,CLN8,TMEM175,GAA,TMEM165,HEXA,HPS1
GO: Biological Process	GO:0007193	adenylate cyclase-inhibiting G-protein coupled receptor signaling pathway		5.694e-05	0.4639	0.001377	0.01319	19	74	ADCY2,ADCY8,NPY1R,NPY2R,OPRL1,CHRM1,CHRM3,CHRM4,PSAP,FLNA,GABBR1,SSTR2,MCHR1,GPR37,GRM2,GRM7,GRM8,HTR1A,HTR1F
GO: Biological Process	GO:0045669	positive regulation of osteoblast differentiation		5.74e-05	0.4676	0.001383	0.01326	18	68	ACVR1,ACVR2A,ACVR2B,JAG1,IFITM1,ATP6AP1,NELL1,BMP4,BMP7,NPPC,PDLIM7,WNT4,NPNT,ATRAID,SFRP2,WNT7B,IL6ST,FAM20C
GO: Biological Process	GO:0030206	chondroitin sulfate biosynthetic process		5.849e-05	0.4765	0.001406	0.01347	10	25	CHPF2,DSE,VCAN,CHPF,CHSY3,CSGALNACT2,CHST12,CSPG5,XYLT2,CHST7
GO: Biological Process	GO:0008306	associative learning		5.961e-05	0.4856	0.001428	0.01369	22	93	ADRA1B,APP,ATP1A3,CACNA1C,NPTX2,NOG,CHRNB2,NLGN3,CLN3,PPT1,CTNS,RELN,DRD5,CLN8,NPTN,GABRA5,GRIN1,GRIN2B,GRM7,TNR,HMGCR,KIT
GO: Biological Process	GO:1902652	secondary alcohol metabolic process		6.225e-05	0.5071	0.001487	0.01425	29	140	ABCA2,APLP2,APP,MBTPS1,CYP7B1,POR,ABCG1,CYP51A1,DHCR7,DHCR24,CLN6,CLN8,MBTPS2,FGFR1,NPC2,SCAP,EBP,SORL1,SQLE,CYP46A1,DGAT2,STARD3,TM7SF2,HMGCR,VLDLR,LMF1,INSIG1,LDLR,LRP1
GO: Biological Process	GO:0072348	sulfur compound transport		6.479e-05	0.5279	0.001539	0.01475	12	35	ABCC1,SLC5A6,SLC33A1,CTNS,SLC26A8,SLC35B3,SLC19A2,SLC1A1,SLC1A4,MFSD3,SLC26A10,SLC35B2
GO: Biological Process	GO:0006505	GPI anchor metabolic process		6.479e-05	0.5279	0.001539	0.01475	12	35	GPAA1,PIGC,PIGH,ALG5,PIGG,PIGX,PIGK,PIGU,PGAP1,PIGT,PIGO,PGAP3
GO: Biological Process	GO:0045778	positive regulation of ossification		6.54e-05	0.5328	0.001549	0.01484	23	100	ACVR1,ACVR2A,ACVR2B,JAG1,IFITM1,ATP6AP1,NELL1,BMP4,BMP7,NPPC,CALCA,PDLIM7,WNT4,PLA2G4A,NPNT,ATRAID,MIA3,SFRP2,GPM6B,WNT5A,WNT7B,IL6ST,FAM20C
GO: Biological Process	GO:2000145	regulation of cell motility		6.691e-05	0.5451	0.001576	0.0151	110	794	ABHD6,ACVR1,ACVR1B,ADAM10,MET,JAG1,MMP2,MMP14,ABCC1,SEMA7A,IFITM1,UNC5C,PODN,HYAL2,ADAM15,ADAM9,NRP2,NRP1,BMP4,BMPER,CALR,NTRK3,FURIN,CD81,CDH13,NOG,PDGFRA,PDGFRB,WNT4,SLIT2,SELENOK,PLAU,PLXNA1,PLXNA2,WDR44,COL1A1,COL3A1,NRG2,CXCL14,PLXNA4,SDC3,SEMA3E,RELN,DAG1,PTGS2,SEMA4C,PTPRJ,PTPRK,PTPRM,PTPRR,DRD5,HBEGF,PTPRU,ECM1,MEMO1,EFNA1,PLXNC1,ROBO1,LGR6,EGFL7,EPHA3,FBXW7,EFEMP1,ATP8A1,FGFR1,CX3CL1,CXC…
GO: Biological Process	GO:0030641	regulation of cellular pH		6.692e-05	0.5452	0.001576	0.0151	20	81	AQP11,SLC12A5,ATP6V0B,ATP6V0A1,ATP6V0E1,CLCN3,CLN3,CLN5,SLC4A7,PPT1,SLC26A8,CLN6,GPR89B,TMEM175,SLC9A1,TMEM165,SLC9A8,SLC26A10,SLC17A7,SLC4A10
GO: Biological Process	GO:0030334	regulation of cell migration		7.007e-05	0.5709	0.001645	0.01576	104	743	ABHD6,ACVR1,ACVR1B,ADAM10,MET,JAG1,MMP2,MMP14,ABCC1,SEMA7A,IFITM1,UNC5C,PODN,HYAL2,ADAM15,ADAM9,NRP2,NRP1,BMP4,BMPER,CALR,NTRK3,FURIN,CDH13,NOG,PDGFRA,PDGFRB,WNT4,SLIT2,SELENOK,PLAU,PLXNA1,PLXNA2,WDR44,COL1A1,COL3A1,CXCL14,PLXNA4,SDC3,SEMA3E,RELN,DAG1,PTGS2,SEMA4C,PTPRJ,PTPRK,PTPRM,PTPRR,DRD5,HBEGF,PTPRU,ECM1,EFNA1,PLXNC1,ROBO1,LGR6,EGFL7,EPHA3,FBXW7,EFEMP1,ATP8A1,FGFR1,CX3CL1,CXCL12,CREB3,SEMA6C…
GO: Biological Process	GO:0048168	regulation of neuronal synaptic plasticity		7.036e-05	0.5733	0.001647	0.01579	17	63	BDNF,SYNGR1,DRD5,RASGRF1,EPHB2,NPTN,SLC8A2,SYP,GRIK1,GRIK2,GRIN1,GRIN2B,GRM5,SHISA6,VGF,KCNN2,KIT
GO: Biological Process	GO:0040007	growth		7.233e-05	0.5893	0.001688	0.01618	145	1104	MUSTN1,ACVR1B,ACVR2B,ADAM10,SLITRK1,SLC12A5,ADRA1B,ADRB1,MMP14,LTBP4,ATRN,ISLR2,SEMA7A,APP,CAPRIN2,RSPO2,DCBLD2,HYAL2,ADAM15,NCAM1,NDN,BDNF,NRP2,NRP1,BMP3,BMP4,BMP7,NELL2,SGPL1,CACNA1A,NPM1,CACNA1C,DDR1,NPPC,NPY1R,ATP6V0E1,NRCAM,NTRK3,WFDC1,IGSF11,OMG,CD44,CD81,LARGE1,NOG,SLIT2,NLGN3,PLAU,PLXNA1,PLXNA2,LRP12,POR,PPIB,TENM4,CCM2L,PPT1,PLXNA4,CTGF,CXADR,SEMA3E,CYBA,LGMN,CLSTN3,KLK6,PSAP,ST7L,PTK7,S…
GO: Biological Process	GO:0019432	triglyceride biosynthetic process		7.278e-05	0.5929	0.001694	0.01623	14	46	DGAT1,LPCAT4,FITM2,FBXW7,LPCAT1,AGPAT5,ACSL5,DGAT2,GPAT4,AGMO,AGPAT3,AGPAT4,LDLR,LPL
GO: Biological Process	GO:0048013	ephrin receptor signaling pathway		7.595e-05	0.6188	0.001763	0.01689	21	88	ADAM10,MMP2,NTRK3,APH1B,PSEN2,EFNA1,EFNA2,APH1A,EPHA10,EPHA3,EPHA4,EPHA5,EPHA7,EPHA8,EPHB1,EPHB2,EPHB3,EPHB6,GRIN1,GRIN2B,NCSTN
GO: Biological Process	GO:0034332	adherens junction organization		7.723e-05	0.6292	0.001787	0.01713	26	121	MMP14,CADM3,WHAMM,CDH2,CDH6,CDH8,CDH9,CDH10,CDH11,CDH12,CDH13,CDH18,WNT4,COL16A1,NECTIN3,PTPRJ,PTPRK,NECTIN1,NECTIN2,EPHA3,SLC9A1,GPM6B,CDH24,THY1,ITGAV,CADM2
GO: Biological Process	GO:0046486	glycerolipid metabolic process		7.755e-05	0.6318	0.00179	0.01715	64	409	ACHE,ABHD6,SERINC1,DGAT1,GPAA1,CDS2,LPCAT4,DAGLA,PDGFRA,PDGFRB,PIGC,PIGH,PI4KA,ALG5,PLA2G4A,MBOAT7,NRG2,FITM2,ABHD12,PTDSS1,PIGG,LPCAT2,PIGX,PIGK,HBEGF,PIGU,FBXW7,LPCAT1,AGPAT5,SH3YL1,ACSL3,ACSL4,CEPT1,PGAP1,CDIPT,FGFR1,STOML2,GDE1,PIGT,SLC37A4,ACSL5,MBOAT2,DGAT2,SERINC3,GPAT4,PIGO,TAZ,ABHD2,GPCPD1,PGAP3,PLA2G15,VAV1,LMF1,AGMO,IL6ST,INSIG1,AGPAT3,AGPAT4,PTDSS2,CHPT1,PLA2G12A,KIT,LDLR,LPL
GO: Biological Process	GO:0048589	developmental growth		7.878e-05	0.6418	0.001813	0.01737	97	685	MUSTN1,ACVR2B,SLITRK1,SLC12A5,ADRA1B,ADRB1,ATRN,ISLR2,SEMA7A,APP,RSPO2,ADAM15,NCAM1,NDN,BDNF,NRP2,NRP1,BMP4,SGPL1,CACNA1C,DDR1,NPPC,NPY1R,NRCAM,NTRK3,OMG,LARGE1,NOG,SLIT2,NLGN3,PLAU,PLXNA1,PLXNA2,POR,PPIB,TENM4,CCM2L,PLXNA4,CXADR,SEMA3E,LGMN,KLK6,PSAP,PTK7,SEMA4C,PTPN12,DHCR7,DSCAM,HBEGF,MEGF8,PLXNC1,ROBO1,EPHA7,ERCC5,RYK,TRPV2,FGFR1,SLC9A6,CXCL12,SEMA6C,SEMA3F,SEMA6B,SEMA4F,SEMA4D,SEMA4B,SEMA3C,…
GO: Biological Process	GO:1901679	nucleotide transmembrane transport		7.944e-05	0.6472	0.001813	0.01737	7	13	SLC35B3,SLC35B1,SLC35E3,SLC35A3,SLC35B4,SLC35A2,SLC35B2
GO: Biological Process	GO:1904152	regulation of retrograde protein transport, ER to cytosol		7.944e-05	0.6472	0.001813	0.01737	7	13	EDEM1,DERL2,BCAP31,UBAC2,EDEM2,ERLEC1,OS9
GO: Biological Process	GO:0002583	regulation of antigen processing and presentation of peptide antigen		7.944e-05	0.6472	0.001813	0.01737	7	13	TREM2,ABCB1,ABCB4,TAP1,TAP2,ABCB9,HFE
GO: Biological Process	GO:0008203	cholesterol metabolic process		8.075e-05	0.6579	0.001838	0.01761	28	135	ABCA2,APLP2,APP,MBTPS1,CYP7B1,POR,ABCG1,CYP51A1,DHCR7,DHCR24,CLN6,CLN8,MBTPS2,NPC2,SCAP,EBP,SORL1,SQLE,CYP46A1,DGAT2,STARD3,TM7SF2,HMGCR,VLDLR,LMF1,INSIG1,LDLR,LRP1
GO: Biological Process	GO:0006516	glycoprotein catabolic process		8.239e-05	0.6712	0.00187	0.01792	8	17	MANBA,STT3B,EDEM1,FBXO6,EDEM3,EDEM2,GPC1,MAN1B1
GO: Biological Process	GO:0021675	nerve development		8.427e-05	0.6866	0.001902	0.01822	19	76	BDNF,NRP2,NRP1,NPTX1,CHRNB2,LRIG1,PLXNA4,DAG1,LRIG2,EPHB1,EPHB2,SEMA3F,TMEM126A,GABRA5,GABRB3,SULF2,SULF1,AFG3L2,KCNA2
GO: Biological Process	GO:0050805	negative regulation of synaptic transmission		8.427e-05	0.6866	0.001902	0.01822	19	76	ACHE,ABHD6,BDNF,NPY2R,NPY5R,NLGN3,SLC24A2,PTGS2,DRD5,SORCS3,GABBR1,SYT11,GPM6B,GRIA1,GRIK1,GRIK2,ATAD1,TNR,HTR6
GO: Biological Process	GO:0007214	gamma-aminobutyric acid signaling pathway		8.684e-05	0.7075	0.001954	0.01873	10	26	BDNF,CACNA1A,GABBR2,GABBR1,GABRA1,GABRA2,GABRA3,GABRA5,GABRB3,GABRG2
GO: Biological Process	GO:0050650	chondroitin sulfate proteoglycan biosynthetic process		9.129e-05	0.7438	0.002049	0.01963	11	31	CHPF2,DSE,VCAN,CHPF,CHSY3,CSGALNACT2,CHST12,PXYLP1,CSPG5,XYLT2,CHST7
GO: Biological Process	GO:0050923	regulation of negative chemotaxis		9.771e-05	0.7961	0.002169	0.02079	4	4	SLIT2,PLXNA4,ROBO1,ROBO2
GO: Biological Process	GO:1904382	mannose trimming involved in glycoprotein ERAD pathway		9.771e-05	0.7961	0.002169	0.02079	4	4	EDEM1,EDEM3,EDEM2,MAN1B1
GO: Biological Process	GO:0060686	negative regulation of prostatic bud formation		9.771e-05	0.7961	0.002169	0.02079	4	4	BMP4,BMP7,SULF1,WNT5A
GO: Biological Process	GO:0035977	protein deglycosylation involved in glycoprotein catabolic process		9.771e-05	0.7961	0.002169	0.02079	4	4	EDEM1,EDEM3,EDEM2,MAN1B1
GO: Biological Process	GO:0021537	telencephalon development		0.000102	0.8311	0.002259	0.02164	45	262	MAS1,SEMA7A,ATP2B4,NRP2,NRP1,BMP4,NFIB,NPY,NTRK2,CDH2,SLIT2,COL3A1,MBOAT7,TSKU,CNTNAP2,PLXNA4,SLITRK5,RELN,PSEN1,PTPRS,TCTN1,CRTAC1,EFNA2,ROBO1,ROBO2,EPHA5,EPHB2,EPHB3,EXT1,RYK,FGFR1,CXCL12,SLIT1,SLIT3,KIRREL3,FUT10,GRIN1,TNR,VLDLR,HTR5A,HTR6,WNT5A,KCNA1,CXCR4,LRP1
GO: Biological Process	GO:0043113	receptor clustering		0.0001027	0.8369	0.002268	0.02173	15	53	CACNA1A,CDH2,NRXN1,NRXN2,RELN,LRRTM4,FLNA,NLGN1,GLRB,RER1,GRIK2,GRIK5,GRIN2B,AGRN,HTR1A
GO: Biological Process	GO:0045595	regulation of cell differentiation		0.000105	0.8553	0.002312	0.02215	210	1706	MAG,MAN2A1,ACHE,ACVR1,ACVR1B,ACVR2A,ACVR2B,AMIGO1,MET,ADRB1,KIDINS220,JAG1,NLGN2,MMP14,LTBP4,ISLR2,TMEM176B,SEMA7A,VASN,IFITM1,LRRC4C,APP,CAPRIN2,BRINP2,DLK2,ATP6AP1,ADGRB3,BDNF,NRP1,NELL1,BMP4,BMP7,NEU1,NFKBIA,TSPO,VWC2L,SDK1,CACNA1A,CNTN4,NPPC,NPR2,CALCA,NRCAM,CALR,NTRK2,NTRK3,NUCB2,OMG,CD34,CD44,CDH2,NOG,PDGFRA,PDLIM7,WNT4,CD83,CHRNB2,SLIT2,NLGN3,CLU,CLPTM1,BAMBI,PLXNA1,PLXNA2,CNTN1,COL1A1,COL…
GO: Biological Process	GO:0044070	regulation of anion transport		0.0001143	0.9311	0.00251	0.02405	32	166	CACNA1A,NPY2R,NPY5R,NTSR1,CCK,P2RX4,CHRNB2,ABCB4,CLCN2,CLCN3,CLCN4,CLCN6,CLCN7,LRRC8D,ACSL4,ATP8A1,CXCL12,LRRC8C,ARL6IP5,GABBR1,ACSL5,ATP8A2,ARL6IP1,GPM6B,GRIK1,GRIN2B,GRM7,LRRC8A,VDAC3,HTR1A,HTR6,KCNA2
GO: Biological Process	GO:0036500	ATF6-mediated unfolded protein response		0.000121	0.9858	0.002609	0.025	6	10	MBTPS1,CALR,MBTPS2,HSP90B1,HSPA5,WFS1
GO: Biological Process	GO:0021785	branchiomotor neuron axon guidance		0.000121	0.9858	0.002609	0.025	6	10	NRP1,PLXNA1,PLXNA2,PLXNA4,PLXNC1,SEMA3F
GO: Biological Process	GO:0021800	cerebral cortex tangential migration		0.000121	0.9858	0.002609	0.025	6	10	NRP2,NRP1,SLIT2,RELN,ROBO1,FGFR1
GO: Biological Process	GO:0097119	postsynaptic density protein 95 clustering		0.000121	0.9858	0.002609	0.025	6	10	NLGN2,CDH2,NRXN1,NRXN2,RELN,NLGN1
GO: Biological Process	GO:1902473	regulation of protein localization to synapse		0.000121	0.9858	0.002609	0.025	6	10	NLGN2,NLGN3,CLSTN3,NLGN1,NPTN,WNT5A
GO: Biological Process	GO:0035437	maintenance of protein localization in endoplasmic reticulum		0.000121	0.9858	0.002609	0.025	6	10	GPAA1,KDELR1,OS9,GRIK5,PDIA3,HSPA5
GO: Biological Process	GO:0040013	negative regulation of locomotion		0.000121	0.986	0.002609	0.025	49	295	ABHD6,SEMA7A,IFITM1,PODN,HYAL2,ADAM15,NRP1,NOG,WNT4,SLIT2,COL3A1,SEMA3E,DAG1,SEMA4C,PTPRJ,PTPRK,PTPRM,PTPRO,PTPRR,DRD5,PTPRU,ROBO1,ROBO2,EGFL7,RYK,CXCL12,SEMA6C,SEMA3F,SEMA6B,SEMA4F,SEMA4D,SEMA4B,SEMA3C,MIA3,SFRP2,IFITM2,SPINT2,SLIT1,SULF1,SEMA4A,ABHD2,GRM5,THY1,TMEFF2,WNT5A,IGFBP5,ITGAV,TRIM11,LRP1
GO: Biological Process	GO:0046466	membrane lipid catabolic process		0.000126	1	0.002709	0.02596	10	27	NAGA,NEU1,SGPL1,PPT1,SMPD1,GBA,SMPDL3B,GLA,GM2A,HEXA
GO: Biological Process	GO:1902475	L-alpha-amino acid transmembrane transport		0.000127	1	0.002723	0.0261	11	32	SLC7A14,SLC17A8,SLC1A1,SLC1A6,SLC7A1,SLC7A4,SLC15A4,SLC7A8,SLC7A3,SLC17A7,SLC7A5
GO: Biological Process	GO:0050806	positive regulation of synaptic transmission		0.0001343	1	0.002872	0.02752	30	153	ADRB1,NLGN2,CACNA1B,NTRK2,NTSR1,CCKBR,CHRNB2,NLGN3,NRXN1,SLC24A2,LRRTM2,RELN,CLSTN3,SYT12,PTGS2,NLGN1,CLSTN1,NPTN,SLC8A2,CLSTN2,SYT1,GRIA1,GRIA4,GRIK1,GRIK2,GRIN1,GRIN2B,TNR,HTR6,LRRTM1
[truncated: 17,139 more rows]

## Sheet: OrangeToppGene.txt
Category	ID	Name	Source	p-value	q-value Bonferroni	q-value FDR B&H	q-value FDR B&Y	Hit Count in Query List	Hit Count in Genome	Hit in Query List
[truncated: 5,763 more rows]

## Sheet: MagentaToppGene.txt
Category	ID	Name	Source	p-value	q-value Bonferroni	q-value FDR B&H	q-value FDR B&Y	Hit Count in Query List	Hit Count in Genome	Hit in Query List
[truncated: 48,385 more rows]

[truncated: 2 more sheets: BrownToppGene.txt, BlueToppGene.txt]
